# Supplementary material for: Electrochemical C(sp3)–C(sp3) cross-dehydrogenative coupling: enabling access to 9-substituted fluorescent acridanes
Source: Royal Society of Chemistry journal article supplement (doi:10.1039/d3cc02127k), 2023-01-01

## Electronic Supporting Information

### Electrochemical C(sp<sup>3</sup>)-C(sp<sup>3</sup>) Cross Dehydrogenative Coupling: Enabling Access to 9-Substituted Fluorescent Acridanes

Shantonu Roy,<sup>§</sup> Sudip Karmakar,<sup>§</sup> Intiaj Mondal,<sup>§</sup> Koushik Naskar,<sup>§</sup> Writhabrata Sarkar<sup>§</sup>  
and Indubhusan Deb\*<sup>§</sup>

<sup>§</sup>Organic and Medicinal Chemistry Division, CSIR-Indian Institute of Chemical Biology, 4-Raja  
S. C. Mullick Road, Jadavpur, Kolkata 700032, India.

\* *Email: indubhusandeb@iicb.res.in, indubhusandeb@gmail.com*

#### Table of contents

|                                                                                                                |            |
|----------------------------------------------------------------------------------------------------------------|------------|
| General Information.....                                                                                       | S2         |
| Preparation of starting materials.....                                                                         | S3 – S5    |
| Representative Bioactive Acridines, 3-coumaranone and 3-isochromanone.....                                     | S5         |
| Additional optimizations of reaction condition, Table S1 and Table S2.....                                     | S6 – S7    |
| Experimental procedure for electrolysis.....                                                                   | S8         |
| Large scale synthetic reaction.....                                                                            | S9         |
| Product transformation.....                                                                                    | S9         |
| Unsuccessful Results.....                                                                                      | S10        |
| Characterization of products.....                                                                              | S11 – S25  |
| Mechanistic study: Radical scavenging and control potential experiments.....                                   | S26        |
| Cyclic voltammetry experiments.....                                                                            | S27        |
| Kinetic isotope effect experiments.....                                                                        | S27 – S28  |
| Fate of 9,10-dihydroacridine and N-protected 9,10-dihydroacridine in standard electrochemical conditions ..... | S28        |
| Comparison with non-electrochemical methods.....                                                               | S29        |
| Fluorescence decay curves.....                                                                                 | S30        |
| Photophysical Study: Absorption and Fluorescence spectroscopic studies.....                                    | S30 – S35  |
| Theoretical calculations.....                                                                                  | S35 – S86  |
| References.....                                                                                                | S87        |
| <sup>1</sup> H and <sup>13</sup> C NMR spectra of compounds.....                                               | S88 – S134 |

## General Information:

All reactions were carried out in oven-dried reaction vessels under a nitrogen atmosphere unless otherwise mentioned. TLC analysis was performed on silica gel TLC plates. Column chromatography was done using 230–400 mesh silica gel by applying pressure through an air pump.  $^1\text{H}$  and  $^{13}\text{C}$  NMR spectra were recorded on 400 and 600 MHz spectrometers and are reported as chemical shifts ( $\delta$ ) in parts per million (ppm), and multiplicities are abbreviated as s = singlet, d = doublet, t = triplet, q = quartet, qu = quintet, m = multiplet, app = apparent, comp = complex. Internal standards or residual solvent signals were used as reference. HRMS (m/z) was recorded using ESI (Q-Tof, positive ion) and EI (magnetic sector, positive ion) mode. Melting points were determined in a capillary melting point apparatus and are uncorrected. Single-crystal X-ray diffraction data were collected on either Bruker APEX II diffractometer with a graphite monochromator using Mo K $\alpha$  radiation or Bruker D8 Venture with a microfocus optics using CuK $\alpha$  radiation. The CIF files were submitted to CCDC (**2238292-2238293**) and can be obtained at <https://summary.ccdc.cam.ac.uk/structure-summary-form>. The electrochemical reactions were studied on the ElectroSyn 2.0 pro. Graphite, Platinum and other electrodes were supplied by IKA. All cyclic voltametric experiments were carried out in K-Lyte 1.2 potentiostat. The fluorescence studies were performed using PTI QM-400 Fluorimeter. Absorption spectra were measured on a Cary 60 UV-Vis Spectrophotometer. Relative quantum yields were determined by using literature method taking quinine sulfate solution in 0.5 M H<sub>2</sub>SO<sub>4</sub> as the standard. Luminescence lifetime measurements were carried out by using time–correlated single photon counting set up from Horiba Jobin-Yvon. The luminescence decay data were collected on a Hamamatsu MCP photomultiplier (R3809) and were analyzed by using IBH DAS6 software. Single crystals of **3aa** and **3bb** were obtained taking 10 mg of the sample in 5 mL round bottom flasks using EtOH/CHCl<sub>3</sub> mixture applying solvent evaporation method.

### Preparation of starting materials:

### Preparation of *N*-alkyl acridones:

These compounds were synthesized according to the known literature procedure with slight modifications. <sup>[1], [2]</sup>

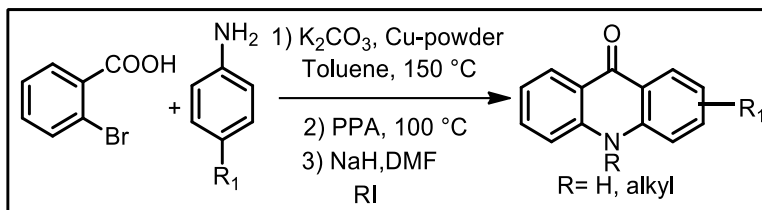

A round-bottomed flask equipped with a magnetic stirrer and reflux condenser was charged with 2-bromobenzoic acid derivatives (5 mmol), potassium carbonate (5.75 mmol), copper (0.9 mmol) and aniline derivatives (7 mmol) in anhydrous toluene. The mixture was heated to reflux (160 °C oil bath) and stirred for further 3 hours. The solvent was evaporated under reduced pressure, and the residue was dissolved in hot water (90 mL) and filtered through Celite. The Celite was washed with water (30 mL), and the filtrate was acidified with concentrated HCl to pH 6. A solid precipitated, which was isolated by filtration and washed with water. The solid was crystallized from CHCl<sub>3</sub> to give 2-(phenylamino)benzoic acid derivatives.

A mixture of 2-(phenylamino)benzoic acid derivatives (4.7 mmol) and polyphosphoric acid (3.9 mL) was heated to 110 °C for 3 h. The solution was poured onto ice (120 mL), and the precipitate was filtered and washed with water. The precipitate was dissolved in hot EtOH, filtered, and evaporated to afford acridone derivatives.

Acridone derivatives (5 mmol) was dissolved in dimethylformamide (8 mL) and cooled to 0 °C. Sodium hydride (12.5 mmol, 2.5 equiv.) was then added in portions while stirring. This was then heated to 60 °C and stirred for 30 mins at which point alkyl iodide (2.5 equiv.) was added and stirred at 60 °C for 18 h. Upon completion, the reaction was cooled to ambient temperature and quenched with water. The solid was filtered via suction filtration and dissolved in chloroform then washed with a brine solution. The organic fractions were combined and dried over MgSO<sub>4</sub> with the volatiles being removed in vacuo to give the crude product.

### 9,10-Dihydroacridines:

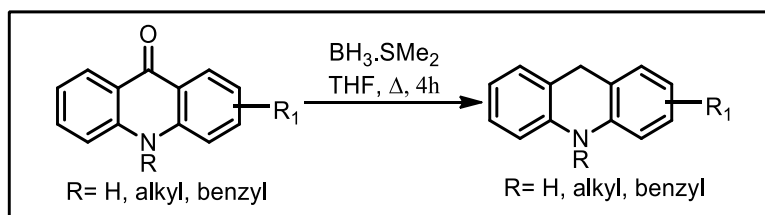

To a slurry of acridone (5.0 mmol) in THF (20 mL) was BH<sub>3</sub>.SMe<sub>2</sub> solution (1 mL, 10.0 mmol) added dropwise and the mixture was refluxed for 4 hours under Ar-atmosphere. On completion (checked by TLC) the mixture was cooled to 0-5 °C and brine (100 mL) was cautiously added followed by 2M aq. NaOH (5 mL). The organic layer was separated, and the aqueous layer was extracted with Et<sub>2</sub>O (1 × 20 mL). The collected organic layers were washed with conc. aq. NaHCO<sub>3</sub> (1 × 10 mL), dried over Na<sub>2</sub>SO<sub>4</sub> and evaporated. The crude product was subjected to column chromatography on silica with DCM to afford crude products.

### N-Benzylacridone derivatives:

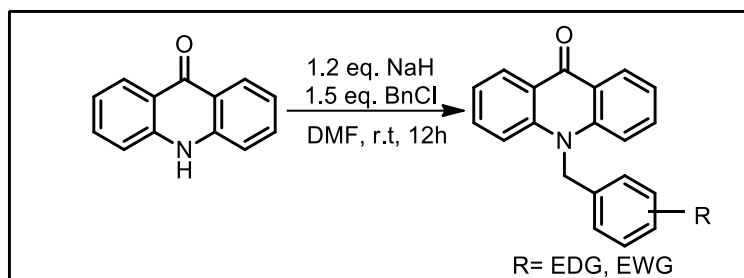

A two-necked round bottom flask equipped with a magnetic stirrer was evacuated and refilled with argon, then charged with NaH (60% in mineral oil; 6.0 mmol) and DMF (8 mL). The slurry was cooled to 0-5 °C and acridone derivatives (5 mmol) were added portion-wise. After an additional 1h at room temperature, benzyl chloride (8 mmol) in DMF (5 mL) was added dropwise and the mixture was stirred overnight. Then H<sub>2</sub>O (25 mL) was added and the product was extracted with EtOAc (3 × 25 mL). The collected organic phases were dried over NaSO<sub>4</sub>, filtered, and evaporated to give the crude product. Column chromatography on silica with DCM-EtOAc (95:5) gave N-benzylacridone-9(10H)-one derivatives.

### N-Phenylacridane derivatives:

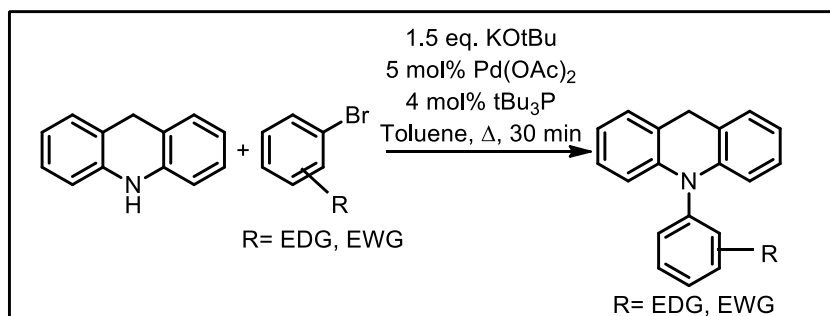

These compounds were synthesized according to the known literature procedure.<sup>[1]</sup> A Schlenk-tube equipped with a magnetic stirrer and a reflux condenser was evacuated and refilled with argon. Then 9,10-dihydroacridine (1.812 g, 10.0 mmol), bromobenzene (1.16 mL, 11.0 mmol), Pd(OAc)<sub>2</sub> (0.112 g, 0.5 mmol), tris(tert-butyl)phosphine (0.081 g, 0.4 mmol) and toluene (12 mL) were added followed by potassium tert-butoxide (1.683 g, 15.0 mmol). The reaction mixture was stirred under reflux (130°C oil bath) for 30 minutes and then allowed to cool to room temperature. The reaction mixture was filtered through a celite bed and washed with DCM (100 mL) and the collected filtrates were evaporated to give the crude product. Column chromatography on silica with hexanes-DCM (90:10) gave N-phenylacridanes.

**N-(Benzyloxycarbonyl)acridane** and **N-(tert-butyloxycarbonyl)acridane** were synthesized according to the known literature procedure.<sup>[1]</sup>

**Preparation of 10-methylacridine-d<sub>2</sub>** (10-methylacridine-d<sub>2</sub> (1a-d<sub>2</sub>) was prepared according to the literature procedure):<sup>[3]</sup> Taking 10-methyl-9,10-dihydroacridine (0.170 g, 0.87 mmol) in DMSO-d<sub>6</sub> (5.0 mL) along with NaH (0.10 g, 4.2 mmol) under an inert atmosphere. The reaction mixture was stirred for ~ 2 hours at 50 °C and then quenched with D<sub>2</sub>O (5.0 mL). The crude product



was filtered and washed thoroughly with distilled H<sub>2</sub>O. <sup>1</sup>H NMR of the product confirmed the formation of 10-methylacridine -d<sub>2</sub> (99% D).

**10-methylacridine -d<sub>2</sub> (1a-d<sub>2</sub>):**

<sup>1</sup>H NMR (400 MHz, Chloroform-*d*) δ 7.34 – 7.22 (comp, 4H), 7.05 – 6.93 (comp, 4H), 3.44 (s, 3H); <sup>13</sup>C NMR (100 MHz, CDCl<sub>3</sub>) δ 143.6, 127.5, 126.8, 124.1, 120.5, 111.8, 33.0, 32.4 (qu, *J* = 18.9 Hz).

**Preparation of 3-Coumaranone Derivatives:**

3-Coumaranone Derivatives were synthesized from literature procedure with slight modifications.<sup>[4], [5]</sup>

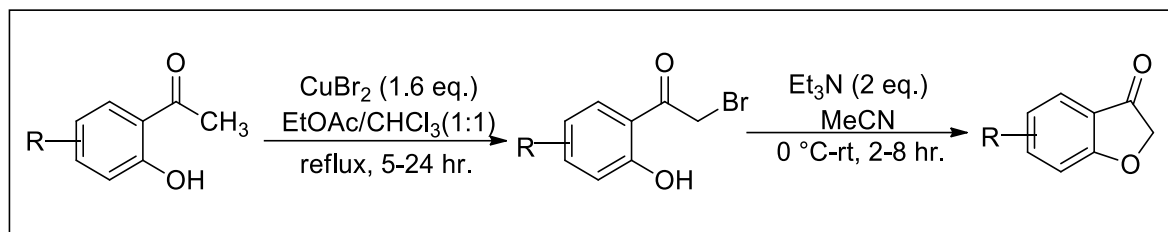

To a solution of *o*-Acetyl phenol (1eq.) in CHCl<sub>3</sub> was added CuBr<sub>2</sub>(1.6 eq.) dissolved in ethyl acetate, the reaction was kept at reflux until the starting material was consumed. White CuBr was removed by filtration and washed with EtOAc. The solvent was concentrated under vacuum and the residue was purified by flash chromatography on silica gel to give the desired 2-Bromo-1-(2-hydroxyacetophenone). 2-Bromo-1-(2-hydroxyacetophenone)(1eq.) was dissolved in MeCN, then cooled to 0°C, and Et<sub>3</sub>N (2eq.) was slowly added. The solution was quenched with water and extracted with DCM. The combined organic phase was dried over Na<sub>2</sub>SO<sub>4</sub> and concentrated. The residue was purified by flash chromatography on silica gel to afford the 3-Coumaranone Derivatives.

**Figure S1. Representative Bioactive Acridines, 3-coumaranone and 3-isochromanone**

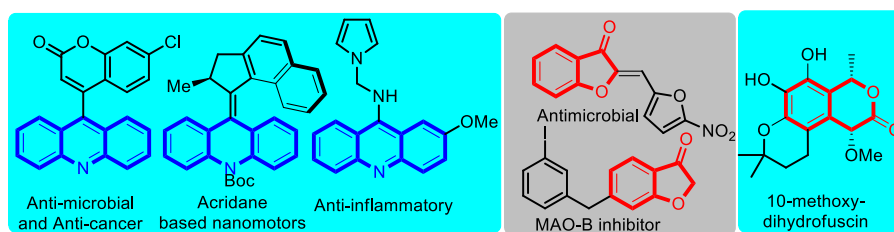

**Table S1: Additional optimization of reaction conditions:** <sup>a</sup>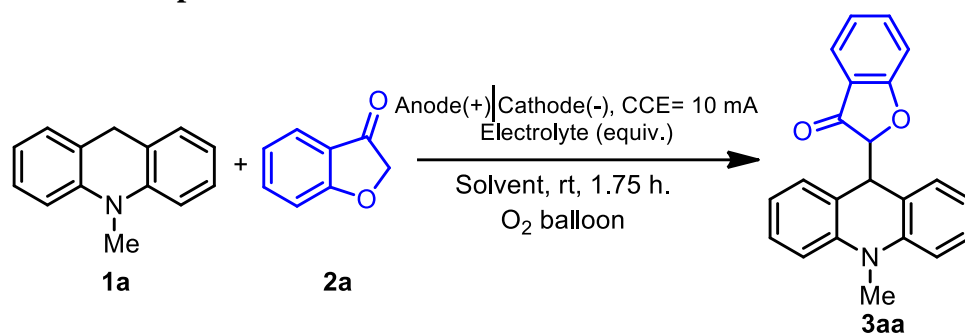

| Entry           | Anode-Cathode | Electrolyte (equiv.)     | Solvent           | Yield <sup>b</sup> of <b>3aa</b> (%) |
|-----------------|---------------|--------------------------|-------------------|--------------------------------------|
| 1               | C-Pt          | TEABF <sub>4</sub> (2.0) | MeOH              | 69                                   |
| 2               | C-Pt          | TEABF <sub>4</sub> (3.0) | MeOH              | 69                                   |
| 3               | C-Pt          | TBABF <sub>4</sub> (2.0) | MeOH              | 51                                   |
| 4               | C-Pt          | TBAPF <sub>6</sub> (2.0) | MeOH              | 42                                   |
| 5               | C-Pt          | TBAB (2.0)               | MeOH              | 46                                   |
| 7               | C-Pt          | LiClO <sub>4</sub> (2.0) | MeOH              | 63                                   |
| 8 <sup>c</sup>  | C-Pt          | TEABF <sub>4</sub> (2.5) | MeOH              | nr                                   |
| 9 <sup>d</sup>  | C-Pt          | TEABF <sub>4</sub> (2.5) | MeOH              | 35                                   |
| 10              | C-Pt          | TEABF <sub>4</sub> (2.5) | MeCN              | 60                                   |
| 11              | C-Pt          | TEABF <sub>4</sub> (2.5) | MeCN/MeOH (1:2)   | 46                                   |
| 12              | C-Pt          | TEABF <sub>4</sub> (2.5) | CHCl <sub>3</sub> | nr                                   |
| 13              | C-Pt          | TEABF <sub>4</sub> (2.5) | <sup>t</sup> AmOH | nr                                   |
| 14              | C-Pt          | TEABF <sub>4</sub> (2.5) | Dry THF           | 42                                   |
| 15 <sup>e</sup> | C-Pt          | TEABF <sub>4</sub> (2.5) | MeOH              | 50                                   |
| 16 <sup>f</sup> | C-Pt          | TEABF <sub>4</sub> (2.5) | MeOH              | 65                                   |
| 17 <sup>g</sup> | C-Pt          | TEABF <sub>4</sub> (2.5) | MeOH              | 39                                   |
| 18 <sup>h</sup> | C-Pt          | TEABF <sub>4</sub> (2.5) | MeOH              | 78                                   |

<sup>a</sup>Reaction conditions: Unless otherwise mentioned, all reactions were performed with **1a** (0.2 mmol, 1.0 equiv), **2a** (0.26 mmol, 1.3 equiv), in 2 mL solvent (0.1 M), constant current = 10 mA, undivided cell, at rt (30 °C) under O<sub>2</sub> balloon for 1.75 h. <sup>b</sup>Isolated yield. <sup>c</sup>MsOH(1 equiv.) as additive. <sup>d</sup>K<sub>2</sub>CO<sub>3</sub> (1equiv.) as additive. <sup>e</sup>Platinum plated ceramic electrode as cathode. <sup>f</sup>air. <sup>g</sup>Under N<sub>2</sub> atmosphere. <sup>h</sup>40 °C instead of rt. “nr”: no reaction. CCE= constant current electrolysis:

**Table S2: Additional optimization Scheme 3:<sup>a</sup>**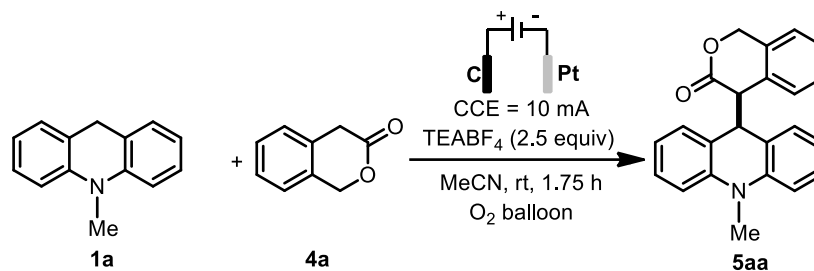

| Entry | 1a:4a<br>(Equivalent ratio) | Solvent | Yield <sup>b</sup> of<br><b>5aa</b> (%) |
|-------|-----------------------------|---------|-----------------------------------------|
| 1     | 1:1.3                       | MeOH    | 60                                      |
| 2     | 1:1.5                       | MeCN    | 72                                      |
| 3     | 1.5:1                       | MeCN    | 76                                      |

<sup>a</sup>Reaction conditions: Unless otherwise mentioned, all reactions were performed with **1** (1.5 equiv), **2** (0.2 mmol, 1.0 equiv), TEABF<sub>4</sub> (2.5 equiv), solvent (2 mL), carbon rod anode, platinum plate cathode, constant current = 10 mA, rt (30 °C), O<sub>2</sub> balloon, 1.75 h. <sup>b</sup>Isolated yield.

### Experimental procedures and characterization data of products:

#### General information for Electrolysis

The ElectraSyn 2.0 package (IKA) was used to execute Electrochemical reactions in constant current mode. The reactions were carried out in a 5 or 20 mL vial with a stir bar and a graphite-SK-50 (5.0 x 0.8 x 0.2 cm) working electrode (anode) and a platinum-plated (5.0 x 0.8 x 0.2 cm) counter-electrode (cathode) separated by 0.6 cm. (Figure S1)

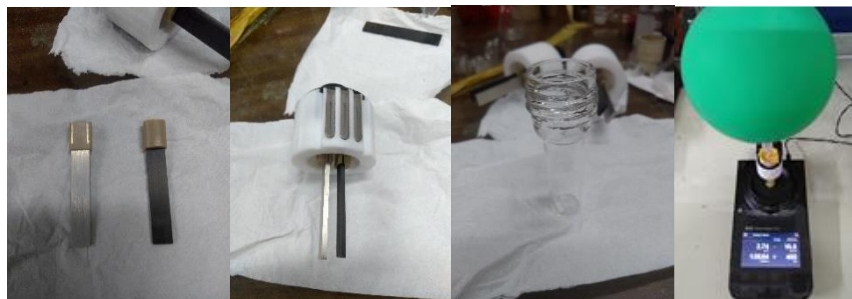**Figure S2.** Experimental electrochemical set-up with ElectraSyn 2.0

**General Procedure for Electrochemical C(sp<sup>3</sup>)/C(sp<sup>3</sup>) Cross Dehydrogenative Coupling Reaction: (0.2 mmol Scale):**

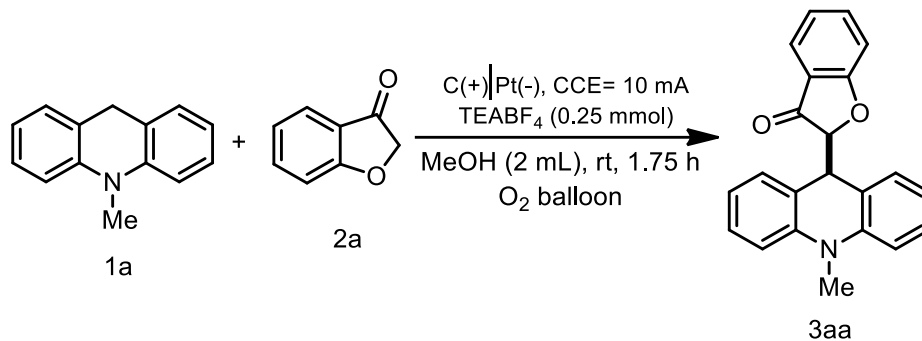

A 5 mL oven-dried electrosyn vial was charged with 10-methyl-9,10-dihydroacridine **1a** (39 mg, 0.2 mmol), 3-coumaranone **2a** (35 mg, 0.26 mmol), TEABF<sub>4</sub> (0.5 mmol, 2.5 equiv,) and MeOH (2.0 mL). The vial was equipped with a graphite rod as the anode (immersed surface area 1.2 x 0.5 cm<sup>2</sup>) and a platinum plate as the cathode (immersed surface area 1.2 x 0.5 cm<sup>2</sup>), the distance between the electrodes was 0.6 cm. The resulting mixture was stirred and electrolyzed at a constant current of 10 mA at ambient temperature for 1.75 h. with an O<sub>2</sub>-balloon. After completion of the reaction indicated by TLC the volatiles were evaporated in vacuum and the crude product was directly purified by column chromatography using ethyl acetate / petroleum ether (5%) to afford product **3aa** (54.9 mg; yield = 84%; R<sub>f</sub> = 0.2).

### Large Scale Synthesis of 3aa at 2.6 mmol:

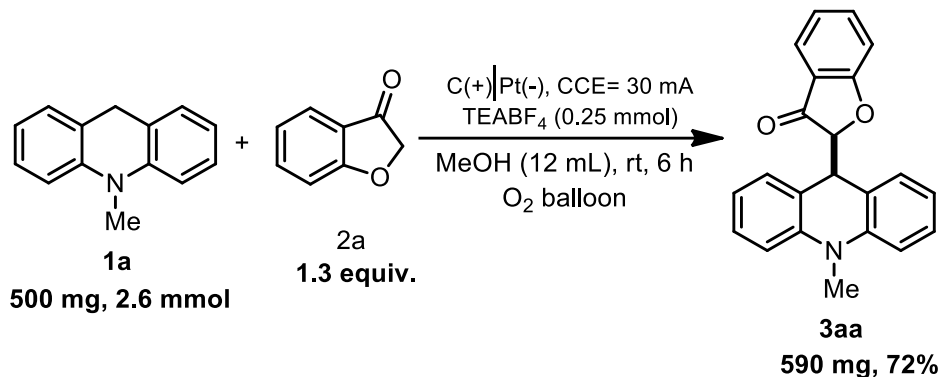

A 20 mL oven-dried electrosyn vial was charged with 10-methyl-9,10-dihydroacridine **1a** (500 mg, 2.6 mmol), 3-coumaranone **2a** (442 mg, 3.3 mmol), TEABF<sub>4</sub> (6.5 mmol, 2.5 equiv.) and MeOH (12 mL). The vial was equipped with a graphite rod as the anode (immersed surface area 1.2 x 0.5 cm<sup>2</sup>) and platinum a plate as the cathode (immersed surface area 1.2 x 0.5 cm<sup>2</sup>), the distance between the electrodes was 0.6 cm. The resulting mixture was stirred and electrolyzed at a constant current of 30 mA at ambient temperature for 6 h. with O<sub>2</sub>-balloon. After completion of the reaction indicated by TLC the volatiles was evaporated in vacuum and the crude product was directly purified by column chromatography using ethyl acetate / petroleum ether (5%) to afford product **3aa** (590 mg; yield = 72%; R<sub>f</sub> = 0.2).

### Product Transformation:

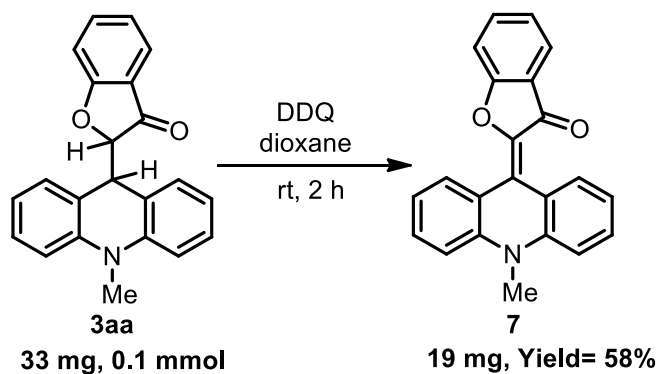

A 5 mL oven-dried sample vial was charged with **3aa** (33 mg, 0.1 mmol), DDQ (45 mg, 0.2 mmol), and Dioxane (2 mL). The mixture was stirred for 2 h. After completion of the reaction indicated by TLC the volatiles were evaporated in vacuum and the crude product was directly purified by column chromatography using ethyl acetate / petroleum ether (10%) to afford product **4aa** (19 mg; yield = 58%; R<sub>f</sub> = 0.1).

Red solid; R<sub>f</sub> 0.10 (pet ether/ethyl acetate = 10:1); **eluent composition** petroleum ether/ethyl acetate = 10:1; mp 128-130 °C; <sup>1</sup>H NMR (400 MHz, CDCl<sub>3</sub>) δ 8.44 (dd, J = 8.0, 1.2 Hz, 2H), 7.81 (app d, J = 7.6 Hz, 1H), 7.56-7.53 (comp, 3H), 7.31 – 7.25 (comp, 5H), 7.17 – 7.14 (m, 1H), 3.74 (s, 1H).; <sup>13</sup>C NMR (100 MHz, CDCl<sub>3</sub>) δ 162.9, 141.4, 139.5, 134.5, 131.2 (X 2), 130.7 (X 2), 127.8, 124.2 (X 2), 123.8, 122.5, 120.7 (X 2), 119.3, 113.0 (X 3), 112.3 (X 2), 34.6. **HRMS** (ESI, m/z) calcd for C<sub>22</sub>H<sub>15</sub>NO<sub>2</sub> [M + H]<sup>+</sup> 326.1181, found 326.1179.

**Table S3. Unsuccessful Substrates:**

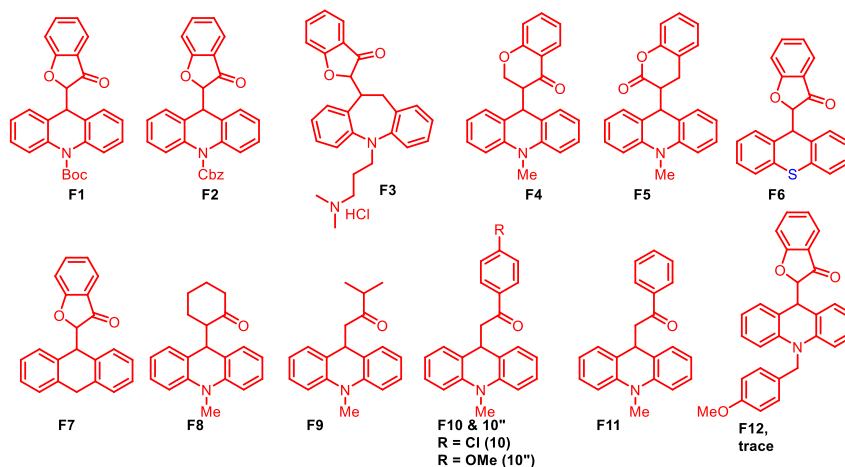

**Reactivity of 9H-Xanthene and 9H-Thioxanthene:**

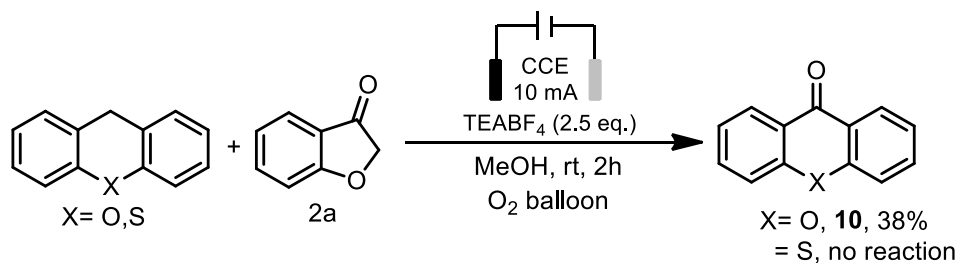

**Reactivity of tertiary C-H:**

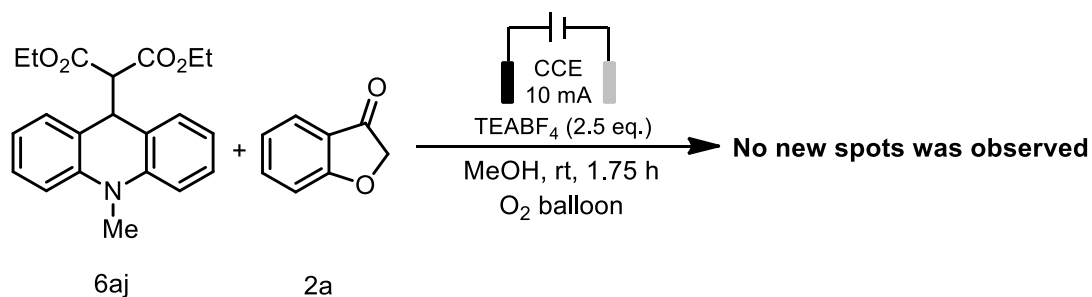

**Reactivity of Acridane with others coupling agents:**

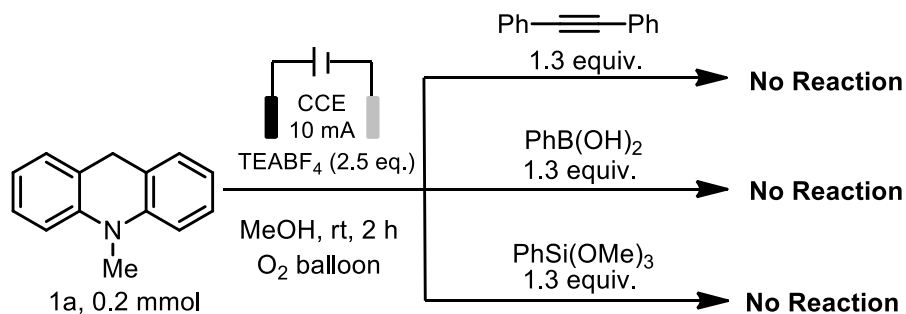

## Characterization Data for the products:

### 2-(10-methyl-9,10-dihydroacridin-9-yl)benzofuran-3(2H)-one (3aa):

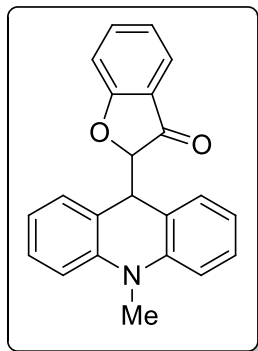

**Yield** 84% (54.9 mg); **Brown solid**; **R<sub>f</sub>** 0.20 (pet ether/ethyl acetate = 20:1); **eluent composition** petroleum ether/ethyl acetate = 20:1; **mp** 126-128 °C (crystallization from hot EtOH/CHCl<sub>3</sub> mixture); **<sup>1</sup>H NMR** (400 MHz, CDCl<sub>3</sub>) δ 7.50 (dd, *J* = 7.6, 0.4, 1H), 7.45 – 7.40 (m, 1H), 7.31 – 7.27 (comp, 2H), 7.13 – 7.08 (comp, 2H), 7.02 – 6.96 (comp, 2H), 6.91 (t, *J* = 7.6 Hz, 1H), 6.87 (app d, *J* = 8.4 Hz, 1H), 6.83 (app d, *J* = 8.0 Hz, 1H), 6.77 (app td, *J* = 7.6, 1.2 Hz, 1H), 4.64 (app d, *J* = 4.0 Hz, 1H), 4.61 (app d, *J* = 4.0 Hz, 1H), 3.44 (s, 3H); **<sup>13</sup>CNMR** (100 MHz, CDCl<sub>3</sub>) δ 200.0, 172.8, 143.4, 143.2, 137.5, 129.1, 128.9, 128.1, 127.9, 123.8, 121.8, 121.7, 121.4, 120.6,

120.2, 119.6, 112.8, 112.4, 112.2, 89.8, 46.0, 33.2.; **HRMS** (ESI, *m/z*) calcd for C<sub>22</sub>H<sub>17</sub>NO<sub>2</sub> [M + H]<sup>+</sup> 328.1338, found 328.1331.

**Figure S3.** X-ray crystal structure of **3aa** (ellipsoid contour at 50% probability level) (CCDC-2238292)

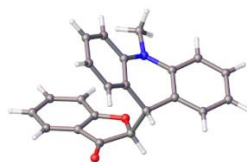

|                                                              |                                                                              |
|--------------------------------------------------------------|------------------------------------------------------------------------------|
| Empirical formula                                            | C <sub>22</sub> H <sub>17</sub> NO <sub>2</sub>                              |
| Formula weight                                               | 327.36                                                                       |
| Temperature/K                                                | 100                                                                          |
| Crystal system                                               | monoclinic                                                                   |
| Space group                                                  | P2 <sub>1</sub> /n                                                           |
| <i>a</i> /Å                                                  | 8.549(3)                                                                     |
| <i>b</i> /Å                                                  | 9.093(2)                                                                     |
| <i>c</i> /Å                                                  | 20.815(5)                                                                    |
| <i>α</i> /°                                                  | 90                                                                           |
| <i>β</i> /°                                                  | 96.522(10)                                                                   |
| <i>γ</i> /°                                                  | 90                                                                           |
| Volume/Å <sup>3</sup>                                        | 1607.6(7)                                                                    |
| <i>Z</i>                                                     | 4                                                                            |
| $\rho_{\text{calc}}/\text{cm}^3$                             | 1.353                                                                        |
| $\mu/\text{mm}^{-1}$                                         | 0.689                                                                        |
| <i>F</i> (000)                                               | 688.0                                                                        |
| Crystal size/mm <sup>3</sup>                                 | 0.2 × 0.2 × 0.2                                                              |
| Radiation                                                    | Cu K $\alpha$ ( $\lambda$ = 1.54184)                                         |
| 2 $\theta$ range for data collection/°                       | 8.552 to 145.336                                                             |
| Index ranges                                                 | -10 ≤ <i>h</i> ≤ 10, -11 ≤ <i>k</i> ≤ 10, -25 ≤ <i>l</i> ≤ 25                |
| Reflections collected                                        | 23659                                                                        |
| Independent reflections                                      | 3123 [ <i>R</i> <sub>int</sub> = 0.0566, <i>R</i> <sub>sigma</sub> = 0.0339] |
| Data/restraints/parameters                                   | 3123/0/227                                                                   |
| Goodness-of-fit on <i>F</i> <sup>2</sup>                     | 1.100                                                                        |
| Final <i>R</i> indexes [ <i>I</i> ≥ 2 $\sigma$ ( <i>I</i> )] | <i>R</i> <sub>1</sub> = 0.0503, <i>wR</i> <sub>2</sub> = 0.1158              |
| Final <i>R</i> indexes [all data]                            | <i>R</i> <sub>1</sub> = 0.0543, <i>wR</i> <sub>2</sub> = 0.1186              |
| Largest diff. peak/hole / e Å <sup>-3</sup>                  | 0.31/-0.27                                                                   |

### 7-methoxy-2-(10-methyl-9,10-dihydroacridin-9-yl)benzofuran-3(2H)-one (3ab):

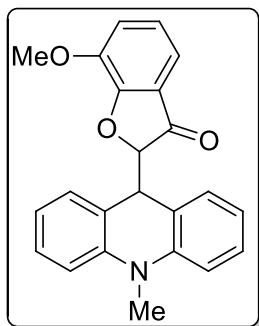

**Yield** 70% (50 mg); Colorless solid; **R<sub>f</sub>** 0.3 (pet ether/ethyl acetate = 10:1); **eluent composition** petroleum ether/ethyl acetate = 20:1; **mp** 143-145°C; **<sup>1</sup>H NMR** (400 MHz, CDCl<sub>3</sub>) 7.29 (app td, *J* = 6.9, 1.5 Hz, 1H), 7.26 – 7.23 (m, 1H), 7.11 – 7.09 (m, 1H), 7.08 – 7.05 (comp, 2H), 6.97 – 6.91 (comp, 3H), 6.84-6.80 (comp, 2H), 6.74 (app td, *J* = 7.4, 1.0 Hz, 1H), 4.69 – 4.67 (m, 1H), 4.65 (app d, *J* = 3.6 Hz, 1H), 3.84 (s, 3H), 3.41 (s, 3H); **<sup>13</sup>C NMR** (100 MHz, CDCl<sub>3</sub>) δ 200.1, 146.2, 143.5, 143.2, 128.9, 128.8, 128.0, 127.9, 123.1, 121.9 (x 2), 121.8, 120.5, 120.1, 119.2, 119.0, 115.2, 112.5, 112.3, 90.6, 56.4, 46.2, 33.3.; **HRMS** (ESI, *m/z*) calcd for C<sub>23</sub>H<sub>20</sub>NO<sub>3</sub>[M + H]<sup>+</sup> 358.1443, found 358.1441.

### 5-methyl-2-(10-methyl-9,10-dihydroacridin-9-yl)benzofuran-3(2H)-one (3ac):

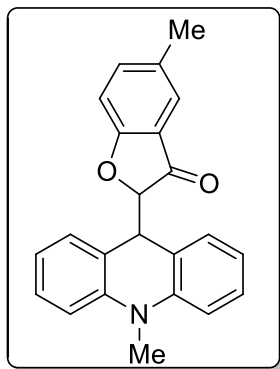

**Yield** 68% (46 mg); Red solid; **R<sub>f</sub>** 0.2 (pet ether/ethyl acetate = 20:1); **eluent composition** petroleum ether/ethyl acetate = 20:1; **mp** 113-115°C; **<sup>1</sup>H NMR** (400 MHz, CDCl<sub>3</sub>) δ 7.31 – 7.27 (comp, 3H), 7.24 (dd, *J* = 8.4, 1.6 Hz, 1H), 7.14 – 7.08 (comp, 2H), 7.01 – 6.95 (comp, 2H), 6.84 (d, *J* = 8.0 Hz, 1H), 6.79 – 6.75 (comp, 2H), 4.62 (app d, *J* = 3.6 Hz, 1H), 4.59 (app d, *J* = 4.0 Hz, 1H), 3.43 (s, 3H), 2.25 (s, 3H); **<sup>13</sup>C NMR** (100 MHz, CDCl<sub>3</sub>) δ 200.0, 171.3, 143.4, 143.2, 138.9, 131.0, 129.1, 128.9, 128.0, 127.9, 123.2, 122.0, 121.5, 120.6, 120.2, 119.8, 112.43, 112.39, 112.2, 90.0, 46.0, 33.3, 20.5.; **HRMS** (ESI, *m/z*) calcd for C<sub>23</sub>H<sub>19</sub>NNaO<sub>2</sub>[M + Na]<sup>+</sup> 364.1313, found 364.1311.

### 7-fluoro-2-(10-methyl-9,10-dihydroacridin-9-yl)benzofuran-3(2H)-one (3ad):

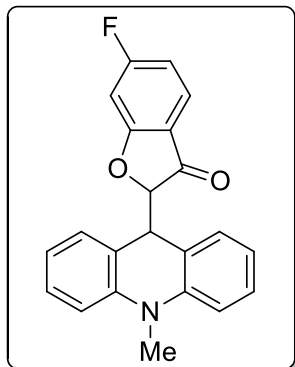

**Yield** 71% (49.0 mg); Orange Jelly; **R<sub>f</sub>** 0.3 (pet ether/ethyl acetate = 20:1); **eluent composition** petroleum ether/ethyl acetate = 20:1; **<sup>1</sup>H NMR** (400 MHz, CDCl<sub>3</sub>) δ 7.48 (dd, *J* = 8.5, 5.8 Hz, 1H), 7.32 – 7.27 (comp, 2H), 7.14 – 7.10 (m, 1H), 7.07 (dd, *J* = 7.5, 1.6 Hz, 1H), 7.01 (dd, *J* = 7.2, 0.8 Hz, 1H), 6.98 – 6.95 (m, 1H), 6.84 (app d, *J* = 8.0 Hz, 1H), 6.76 (app td, *J* = 7.6, 1.2 Hz, 1H), 6.63 (app td, *J* = 8.4, 2.0 Hz, 1H), 6.52 (dd, *J* = 9.2, 2.0 Hz, 1H), 4.67 – 4.64 (comp, 2H), 3.43 (s, 3H); **<sup>13</sup>C NMR** (100 MHz, CDCl<sub>3</sub>) δ 198.0, 174.3 (d, <sup>2</sup>*J*<sub>C-F</sub> = 15.0 Hz), 169.0 (d, <sup>1</sup>*J*<sub>C-F</sub> = 256.0 Hz), 143.3, (d, <sup>2</sup>*J*<sub>C-F</sub> = 16 Hz), 129.2, 128.9, 128.2 (d, <sup>3</sup>*J*<sub>C-F</sub> = 10 Hz), 125.7 (d, <sup>3</sup>*J*<sub>C-F</sub> = 13 Hz), 121.7, 120.8, 120.4, 119.2, 118.5, 112.6, 112.4, 110.6, 110.3, 100.3, 100.1, 91.4, 46.1, 33.4.; **<sup>19</sup>F NMR** (376 MHz, CDCl<sub>3</sub>) δ<sub>F</sub> -97.4 (s, 1F); **HRMS** (ESI, *m/z*) calcd for C<sub>22</sub>H<sub>16</sub>FNO<sub>2</sub>[M + H]<sup>+</sup> 346.1243, found 346.1230.



### 2-(10-ethyl-9,10-dihydroacridin-9-yl)benzofuran-3(2H)-one (3ba):

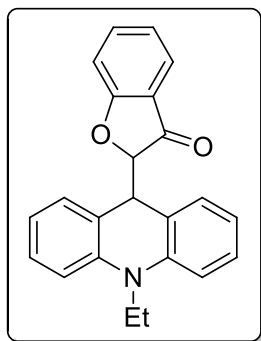

**Yield** 52% (36 mg); Red solid; **R<sub>f</sub>** 0.2 (pet ether/ethyl acetate = 20:1); **eluent composition** petroleum ether/ethyl acetate = 20:1; **mp** 134-136°C; **<sup>1</sup>H NMR** (400 MHz, CDCl<sub>3</sub>) δ 7.48 – 7.46 (m, 1H), 7.42 – 7.37 (m, 1H), 7.31 – 7.26 (comp, 2H), 7.06 – 7.00 (comp, 3H), 6.97 (app td, *J* = 7.6, 1.2 Hz, 1H), 6.90 – 6.80 (comp, 3H), 6.66 (app td, *J* = 7.6, 0.8 Hz, 1H), 4.72 (d, *J* = 3.2 Hz, 1H), 4.55 (d, *J* = 3.6 Hz, 1H), 4.09 – 3.98 (m, 2H), 1.41 (t, *J* = 7.0 Hz, 3H).; **<sup>13</sup>C NMR** (100 MHz, CDCl<sub>3</sub>) δ 200.1, 173.0, 141.8, 141.7, 137.5, 129.3, 129.0, 128.1, 127.9, 123.7, 121.8, 121.6, 121.4, 120.5, 119.9, 118.5, 112.8, 112.4, 112.3, 91.3, 45.7, 40.3, 11.9.; **HRMS** (ESI, *m/z*) calcd for C<sub>23</sub>H<sub>19</sub>NO<sub>2</sub> [M + H]<sup>+</sup> 342.1494, found 342.1492.

### 2-(10-ethyl-9,10-dihydroacridin-9-yl)-7-methoxybenzofuran-3(2H)-one (3bb):

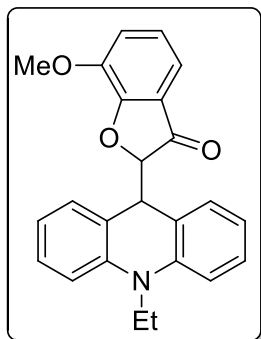

**Yield** 68% (50 mg); Yellow solid; **R<sub>f</sub>** 0.3 (pet ether/ethyl acetate = 10:1); **eluent composition** petroleum ether/ethyl acetate = 20:1; **mp** 146-148°C; **<sup>1</sup>H NMR** (400 MHz, CDCl<sub>3</sub>) δ 7.30 (dd, *J* = 7.6, 1.2 Hz, 1H), 7.26 – 7.21 (m, 1H), 7.08 – 7.03 (comp, 3H), 6.99 (app d, *J* = 8.4 Hz, 1H), 6.94 – 6.89 (m, 2H), 6.86 (app d, *J* = 8.0 Hz, 1H), 6.80 (app t, *J* = 7.8 Hz, 1H), 6.78 (app td, *J* = 7.6, 0.8 Hz, 1H), 4.74 (d, *J* = 3.2 Hz, 1H), 4.60 (d, *J* = 3.2 Hz, 1H), 4.07 – 3.93 (m, 2H), 3.82 (s, 3H), 1.41 (t, *J* = 7.1 Hz, 3H).; **<sup>13</sup>C NMR** (100 MHz, CDCl<sub>3</sub>) δ 200.1, 163.2, 146.1, 142.0, 141.6, 129.2, 128.9, 128.1, 127.9, 123.2, 121.8, 121.4, 120.4, 119.8, 119.0, 118.2, 115.1, 112.5, 112.2, 91.7, 56.4, 45.9, 40.5, 11.8.; **HRMS** (ESI, *m/z*) calcd for C<sub>24</sub>H<sub>21</sub>NO<sub>3</sub> [M + H]<sup>+</sup> 372.1600, found 372.1598.

**Figure S4.**X-ray crystal structure of **3bb** (ellipsoid contour at 50% probability level) (CCDC-2238293)

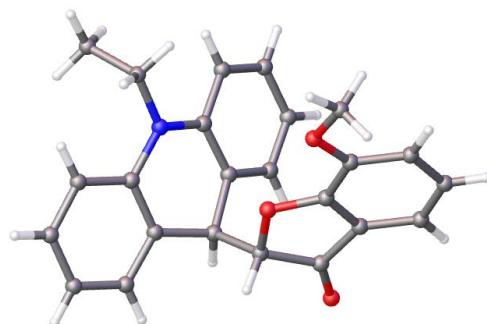

|                          |                                                 |
|--------------------------|-------------------------------------------------|
| <b>Empirical formula</b> | C <sub>24</sub> H <sub>21</sub> NO <sub>3</sub> |
| <b>Formula weight</b>    | 371.42                                          |
| <b>Temperature/K</b>     | 100.0                                           |
| <b>Crystal system</b>    | monoclinic                                      |
| <b>Space group</b>       | P2 <sub>1</sub> /n                              |
| <b><i>a</i>/Å</b>        | 13.5269(9)                                      |
| <b><i>b</i>/Å</b>        | 9.3422(6)                                       |
| <b><i>c</i>/Å</b>        | 15.1324(10)                                     |
| <b><i>α</i>/°</b>        | 90                                              |
| <b><i>β</i>/°</b>        | 105.484(2)                                      |
| <b><i>γ</i>/°</b>        | 90                                              |

|                                             |                                                               |
|---------------------------------------------|---------------------------------------------------------------|
| Volume/Å <sup>3</sup>                       | 1842.9(2)                                                     |
| Z                                           | 4                                                             |
| $\rho_{\text{calc}}/\text{cm}^3$            | 1.339                                                         |
| $\mu/\text{mm}^{-1}$                        | 0.707                                                         |
| F(000)                                      | 784.0                                                         |
| Crystal size/mm <sup>3</sup>                | 0.35 × 0.25 × 0.2                                             |
| Radiation                                   | Cu K $\alpha$ ( $\lambda = 1.54178$ )                         |
| 2 $\theta$ range for data collection/°      | 7.796 to 130.198                                              |
| Index ranges                                | -15 ≤ h ≤ 15, -9 ≤ k ≤ 10, -17 ≤ l ≤ 17                       |
| Reflections collected                       | 27657                                                         |
| Independent reflections                     | 3095 [R <sub>int</sub> = 0.0655, R <sub>sigma</sub> = 0.0386] |
| Data/restraints/parameters                  | 3095/0/115                                                    |
| Goodness-of-fit on F <sup>2</sup>           | 1.039                                                         |
| Final R indexes [I ≥ 2 $\sigma$ (I)]        | R <sub>1</sub> = 0.0736, wR <sub>2</sub> = 0.1861             |
| Final R indexes [all data]                  | R <sub>1</sub> = 0.0746, wR <sub>2</sub> = 0.1869             |
| Largest diff. peak/hole / e Å <sup>-3</sup> | 0.56/-0.60                                                    |

### 2-(10-ethyl-9,10-dihydroacridin-9-yl)-5-methoxybenzofuran-3(2H)-one (3bc):

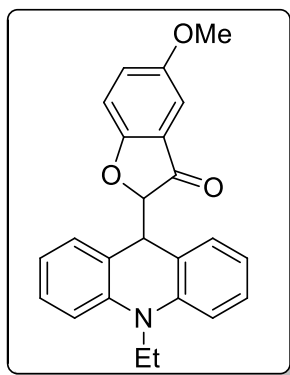

**Yield** 66% (49 mg); Red solid; **R<sub>f</sub>** 0.3 (pet ether/ethyl acetate = 20:1); **eluent composition** petroleum ether/ethyl acetate = 20:1; **mp** 126–128°C; **<sup>1</sup>H NMR** (400 MHz, CDCl<sub>3</sub>)  $\delta$  7.31 – 7.27 (comp, 2H), 7.08 – 7.01 (comp, 4H), 6.97 (app td,  $J = 7.6, 0.8$  Hz, 1H), 6.88 – 6.86 (comp, 2H), 6.75 (app d,  $J = 9.2$  Hz, 1H), 6.69 (app td,  $J = 7.6, 0.8$  Hz, 1H), 4.71 (d,  $J = 3.2$  Hz, 1H), 4.57 (d,  $J = 3.2$  Hz, 1H), 4.09 – 4.00 (m, 2H), 3.71 (s, 3H), 1.40 (t,  $J = 7.1$  Hz, 3H); **<sup>13</sup>C NMR** (100 MHz, CDCl<sub>3</sub>)  $\delta$  200.3, 168.4, 154.5, 141.8, 141.7, 129.3, 129.0, 128.1, 127.9, 127.6, 121.7, 121.6, 120.4, 119.9, 118.6, 113.7, 112.4, 112.3, 103.5, 92.2, 55.8, 45.7, 40.3, 11.8.; **HRMS** (ESI, m/z) calcd for C<sub>24</sub>H<sub>21</sub>NO<sub>3</sub> [M + H]<sup>+</sup> 372.1600,

found 372.1603.

### 5-ethyl-2-(10-methyl-9,10-dihydroacridin-9-yl)benzofuran-3(2H)-one (3bd):

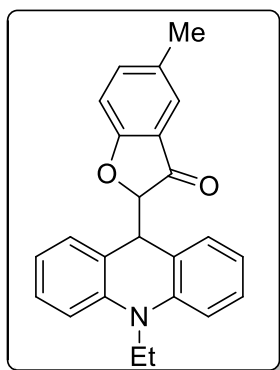

**Yield** 50% (35 mg); Red solid; **R<sub>f</sub>** 0.3 (pet ether/ethyl acetate = 20:1); **eluent composition** petroleum ether/ethyl acetate = 20:1; **mp** 135–137°C; **<sup>1</sup>H NMR** (400 MHz, CDCl<sub>3</sub>)  $\delta$  7.31 – 7.29 (m, 1H), 7.27 – 7.25 (comp, 2H), 7.21 (dd,  $J = 8.4, 2.0$ , 1H), 7.08 – 7.03 (comp, 3H), 6.98 – 6.94 (m, 1H), 6.87 (d,  $J = 8.4$  Hz, 1H), 6.72 (d,  $J = 9.2$  Hz, 1H), 6.71 – 6.67 (m, 1H), 4.70 (d,  $J = 3.2$  Hz, 1H), 4.55 (d,  $J = 3.2$  Hz, 1H), 4.09 – 3.99 (comp, 2H), 2.24 (s, 3H), 1.41 (t,  $J = 7.0$  Hz, 3H); **<sup>13</sup>C NMR** (100 MHz, CDCl<sub>3</sub>)  $\delta$  200.1, 171.5, 141.8, 141.7, 138.9 (x 2), 130.9, 129.3, 129.0, 128.1, 127.9, 123.1, 121.8, 120.4, 119.9, 118.7, 112.41, 112.35, 112.3, 91.6, 45.6, 40.3, 20.5, 11.9.; **HRMS** (ESI, m/z) calcd for C<sub>24</sub>H<sub>21</sub>NO<sub>2</sub>[M + H]<sup>+</sup> 356.1651, found 356.1646.

### 2-(10-ethyl-9,10-dihydroacridin-9-yl)-7-fluorobenzofuran-3(2H)-one (3be):

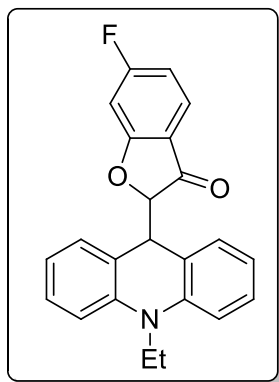

**Yield** 56% (40 mg); Red Jelly; **R<sub>f</sub>** 0.2 (pet ether/ethyl acetate = 20:1); **eluent composition** petroleum ether/ethyl acetate = 20:1; **<sup>1</sup>H NMR** (400 MHz, CDCl<sub>3</sub>) δ 7.46 (dd, *J* = 8.5, 5.8 Hz, 1H), 7.32 – 7.28 (comp, 2H), 7.10 – 7.05 (m, 1H), 7.03 (app dd, *J* = 7.6, 2.0 Hz, 2H), 6.98 (app td, *J* = 7.6, 0.8 Hz, 1H), 6.88 (app d, *J* = 8.0 Hz, 1H), 6.68 (app td, *J* = 7.6, 1.2 Hz, 1H), 6.61 (app td, *J* = 8.4, 2.0 Hz, 1H), 6.48 (dd, *J* = 9.2, 2.0 Hz, 1H), 4.72 (d, *J* = 3.2 Hz, 1H), 4.62 (d, *J* = 3.2 Hz, 1H), 4.07 – 4.01 (m, 2H), 1.41 (t, *J* = 7.2 Hz, 3H).; **<sup>13</sup>C NMR** (100 MHz, CDCl<sub>3</sub>) <sup>13</sup>C NMR (101 MHz, Chloroform-d) δ 198.0, 174.3 (d, <sup>2</sup>*J*<sub>C-F</sub> = 14.8 Hz), 168.9 (d, <sup>1</sup>*J*<sub>C-F</sub> = 257.7 Hz), 141.7 (d, <sup>2</sup>*J*<sub>C-F</sub> = 17.4 Hz), 129.3, 128.9, 128.1 (d, <sup>3</sup>*J*<sub>C-F</sub> = 11.0 Hz), 125.6 (d, <sup>3</sup>*J*<sub>C-F</sub> = 12.3 Hz), 121.4, 120.5, 119.9, 118.5, 118.1, 112.5, 112.3, 110.4, 110.2, 100.1, 99.9, 92.7, 45.6, 40.3, 11.8.; **<sup>19</sup>F NMR** (376 MHz, CDCl<sub>3</sub>) δ<sub>F</sub> -97.4 (s, 1F); **HRMS** (ESI, m/z) calcd for C<sub>23</sub>H<sub>18</sub>FNO<sub>2</sub> [M + H]<sup>+</sup> 360.1400, found 360.1385.

### 2-(10-isopentyl-9,10-dihydroacridin-9-yl)benzofuran-3(2H)-one (3ca):

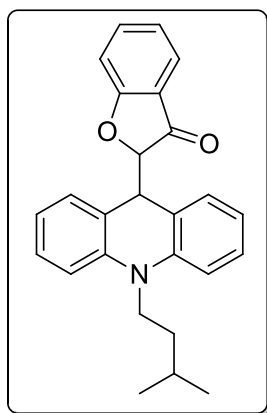

**Yield** 59% (45 mg); Red Jelly; **R<sub>f</sub>** 0.4 (pet ether/ethyl acetate = 20:1); **eluent composition** petroleum ether/ethyl acetate = 20:1; **<sup>1</sup>H NMR** (400 MHz, CDCl<sub>3</sub>) δ 7.49 – 7.46 (m, 1H), 7.42 – 7.38 (m, 1H), 7.32 – 7.25 (comp, 2H), 7.08 – 7.03 (comp, 2H), 7.00 – 6.94 (comp, 2H), 6.91 – 6.87 (m, 1H), 6.84 – 6.82 (comp, 2H), 6.68 (app td, *J* = 7.6, 1.2 Hz, 1H), 4.72 (d, *J* = 3.2 Hz, 1H), 4.56 (d, *J* = 3.2 Hz, 1H), 3.97 – 3.92 (comp, 2H), 1.87 – 1.78 (m, 1H), 1.76 – 1.70 (m, 2H), 1.08 (d, *J* = 1.6 Hz, 3H), 1.07 (d, *J* = 1.6 Hz, 3H).; **<sup>13</sup>C NMR** (100 MHz, CDCl<sub>3</sub>) δ 200.1, 172.9, 142.0, 141.8, 137.5, 129.3, 129.0, 128.1, 127.9, 123.7, 121.8, 121.6, 121.4, 120.4, 119.9, 118.4, 112.8, 112.4, 112.3, 91.3, 45.7, 44.4, 34.5, 26.8, 22.6 (x 2).; **HRMS** (ESI, m/z) calcd for C<sub>26</sub>H<sub>25</sub>NO<sub>2</sub> [M + H]<sup>+</sup> 384.1964, found 384.1966.

### 2-(10-isopentyl-9,10-dihydroacridin-9-yl)-7-methoxybenzofuran-3(2H)-one (3cb):

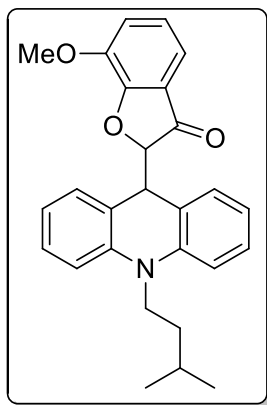

**Yield** 56% (46 mg); Red solid; **R<sub>f</sub>** 0.4 (pet ether/ethyl acetate = 20:1); **eluent composition** petroleum ether/ethyl acetate = 20:1; **mp** 118-120°C; **<sup>1</sup>H NMR** (400 MHz, CDCl<sub>3</sub>) δ 7.29 (dd, *J* = 7.5, 1.3 Hz, 1H), 7.25 – 7.21 (m, 1H), 7.09 – 7.02 (m, 3H), 6.97 – 6.88 (m, 3H), 6.85 – 6.77 (m, 2H), 6.68 (app td, *J* = 7.5, 0.8 Hz, 1H), 4.73 (d, *J* = 3.2 Hz, 1H), 4.60 (d, *J* = 3.2 Hz, 1H), 3.99 – 3.86 (m, 2H), 3.83 (s, 3H), 1.85 – 1.70 (comp, 3H), 1.09 (d, *J* = 1.2 Hz, 3H), 1.07 (d, *J* = 1.2 Hz, 3H).; **<sup>13</sup>C NMR** (100 MHz, CDCl<sub>3</sub>) δ 200.1, 163.1, 146.1, 142.2, 141.8, 129.1, 128.9, 128.1, 127.9, 123.2, 121.8, 121.2, 120.3, 119.8, 118.9, 118.2, 115.1, 112.4, 112.2, 91.6, 56.3, 45.9, 45.0, 34.3, 26.9, 22.6 (x 2).; **HRMS** (ESI, m/z) calcd for C<sub>27</sub>H<sub>27</sub>NO<sub>3</sub> [M + H]<sup>+</sup> 414.2069, found 414.2063.

### 2-(10-isopentyl-9,10-dihydroacridin-9-yl)-5-methoxybenzofuran-3(2H)-one (3cc):

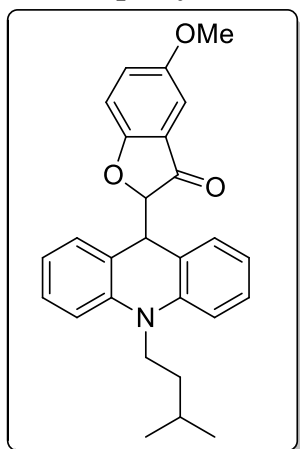

**Yield** 54% (45 mg); Red solid; **R<sub>f</sub>** 0.4 (pet ether/ethyl acetate = 20:1); **eluent composition** petroleum ether/ethyl acetate = 20:1; **mp** 123-125°C; **<sup>1</sup>H NMR** (400 MHz, CDCl<sub>3</sub>) δ 7.31 – 7.24 (comp, 3H), 7.08 – 7.06 (m, 1H), 7.05 – 7.02 (comp, 2H), 6.99 – 6.94 (comp, 2H), 6.87 (app d, *J* = 2.8 Hz, 1H), 6.84 (app d, *J* = 8.4 Hz, 1H), 6.75 (app d, *J* = 9.2 Hz, 1H), 6.68 (app td, *J* = 7.6, 0.8 Hz, 1H), 4.71 (d, *J* = 3.2 Hz, 1H), 4.56 (d, *J* = 3.2 Hz, 1H), 3.96 – 3.91 (m, 2H), 3.72 (s, 3H), 1.77 – 1.69 (comp, 3H), 1.08 (d, *J* = 1.6 Hz, 3H), 1.06 (d, *J* = 1.6 Hz, 3H); **<sup>13</sup>C NMR** (100 MHz, CDCl<sub>3</sub>) δ 200.3, 168.4, 154.5, 142.0, 141.8, 129.2, 129.0, 128.1, 127.9, 127.6, 121.7, 121.6, 120.4, 119.9, 118.5, 113.7, 112.4, 112.3, 103.5, 92.2, 55.8, 45.7, 44.4, 34.5, 26.7, 22.6 (x 2); **HRMS** (ESI, *m/z*) calcd for C<sub>27</sub>H<sub>27</sub>NO<sub>3</sub> [M + H]<sup>+</sup>414.2069, found 414.2067.

### 2-(10-benzyl-9,10-dihydroacridin-9-yl)benzofuran-3(2H)-one (3da):

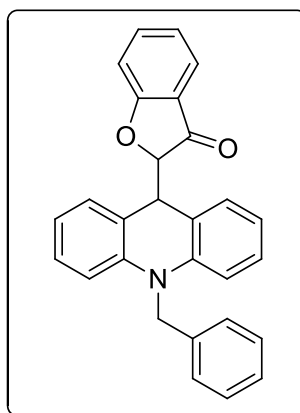

**Yield** 58% (47 mg); colourless solid; **R<sub>f</sub>** 0.3 (pet ether/ethyl acetate = 10:1); **eluent composition** petroleum ether/ethyl acetate = 20:1; **mp** 98-100°C; **<sup>1</sup>H NMR** (400 MHz, CDCl<sub>3</sub>) δ 7.47 (dd, *J* = 8.0 Hz, 0.8 Hz, 1H), 7.44 – 7.39 (m, 1H), 7.36 – 7.28 (comp, 4H), 7.21 (app d, *J* = 7.2 Hz, 2H), 7.16 – 7.14 (m, 1H), 7.08 (dd, *J* = 7.6, 1.2 Hz, 1H), 6.97 (dd, *J* = 7.4, 0.9 Hz, 1H), 6.95 – 6.91 (m, 1H), 6.86 – 6.90 (comp, 2H), 6.76 (app d, *J* = 8.4 Hz, 1H), 6.69 (app td, *J* = 7.2, 0.8 Hz, 1H), 6.61 (app d, *J* = 8.0 Hz, 1H), 5.25 – 5.11 (comp, 2H), 4.82 (d, *J* = 2.8 Hz, 1H), 4.65 (d, *J* = 3.2 Hz, 1H);

**<sup>13</sup>C NMR** (100 MHz, CDCl<sub>3</sub>) δ 200.1, 173.0, 142.6, 142.3, 137.6, 137.2, 129.0, 128.8 (X 2), 128.7, 128.2, 128.0, 126.9, 126.0 (x 2), 123.8, 121.8, 121.4, 121.0, 120.4, 118.6, 113.5, 113.3, 112.8, 108.4, 91.4, 51.4, 45.5.; **HRMS** (ESI, *m/z*) calcd for C<sub>28</sub>H<sub>21</sub>NKO<sub>2</sub> [M + K]<sup>+</sup> 442.1209, found 442.1242.

### 2-(10-benzyl-9,10-dihydroacridin-9-yl)-7-methoxybenzofuran-3(2H)-one (3db):

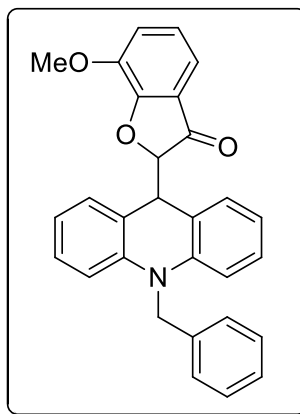

**Yield** 72% (62 mg); pink solid; **R<sub>f</sub>** 0.3 (pet ether/ethyl acetate = 10:1); **eluent composition** petroleum ether/ethyl acetate = 10:1; **mp** 172-174°C; **<sup>1</sup>H NMR** (400 MHz, CDCl<sub>3</sub>) δ 7.35 – 7.28 (comp, 4H), 7.21 (app d, *J* = 6.8 Hz, 2H), 7.11 – 7.07 (comp, 2H), 7.05 (dd, *J* = 7.6, 1.2 Hz, 1H), 6.95 – 6.90 (comp, 3H), 6.83 – 6.79 (m, 1H), 6.73 – 6.67 (comp, 2H), 6.60 (d, *J* = 8.4 Hz, 1H), 5.23 – 5.06 (comp, 2H), 4.83 (d, *J* = 3.2 Hz, 1H), 4.68 (d, *J* = 2.8 Hz, 1H), 3.89 (s, 3H); **<sup>13</sup>C NMR** (100 MHz, CDCl<sub>3</sub>) δ 200.1, 163.1, 146.1, 142.9, 142.4, 137.5, 128.84, 128.79 (x 2), 128.5, 128.1, 128.0, 126.9, 126.0 (x 2), 123.2, 121.9, 121.8, 120.9, 120.4, 118.8, 118.5, 115.0, 113.7, 113.3, 91.7, 56.4, 52.0, 45.7.; **HRMS** (ESI, *m/z*) calcd for C<sub>29</sub>H<sub>23</sub>NNaO<sub>3</sub> [M + Na]<sup>+</sup>456.1576,

found 456.1577.

### 2-(10-(4-methylbenzyl)-9,10-dihydroacridin-9-yl)benzofuran-3(2H)-one (3ea):

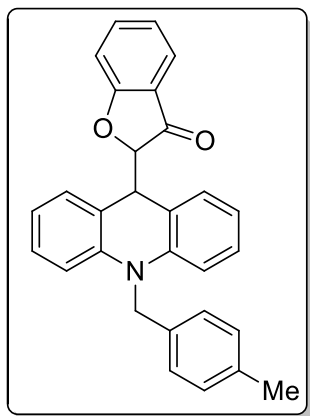

**Yield** 44% (37 mg); Red solid; **R<sub>f</sub>** 0.2 (pet ether/ethyl acetate = 20:1); **eluent composition** petroleum ether/ethyl acetate = 20:1; **mp** 60-65°C; **<sup>1</sup>H NMR** (400 MHz, CDCl<sub>3</sub>) δ 7.48 – 7.46 (m, 1H), 7.44 – 7.39 (m, 1H), 7.34 (dd, *J* = 7.5, 1.4 Hz, 1H), 7.15 – 7.06 (comp, 6H), 6.97 (dd, *J* = 7.6, 1.2 Hz, 1H), 6.94 – 6.86 (comp, 3H), 6.77 (app d, *J* = 8.4 Hz, 1H), 6.68 (app td, *J* = 7.6, 1.2 Hz, 1H), 6.63 (app d, *J* = 8.4 Hz, 1H), 5.22 – 5.07 (comp, 2H), 4.82 (d, *J* = 3.2, 1H), 4.64 (d, *J* = 3.2 Hz, 1H), 2.34 (s, 3H).;

**<sup>13</sup>C NMR** (100 MHz, CDCl<sub>3</sub>) δ 200.1, 173.0, 142.6, 142.4, 137.6, 136.5, 134.0, 129.5 (X 2), 129.0, 128.6, 128.2, 128.0, 125.9 (X 2), 123.8, 121.84, 121.81, 121.4, 120.9, 120.4, 118.6, 113.5, 113.3, 112.8,

91.4, 51.2, 45.5, 21.1. **HRMS** (ESI, *m/z*) calcd for C<sub>29</sub>H<sub>23</sub>NNaO<sub>2</sub> [M + Na]<sup>+</sup> 440.1626, found 440.1661.

### 7-methoxy-2-(10-(4-methylbenzyl)-9,10-dihydroacridin-9-yl)benzofuran-3(2H)-one (3eb):

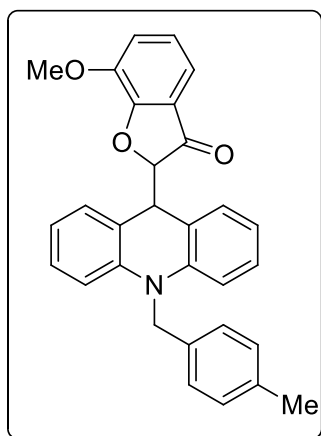

**Yield** 55% (49 mg); Red solid; **R<sub>f</sub>** 0.2 (pet ether/ethyl acetate = 10:1); **eluent composition** petroleum ether/ethyl acetate = 10:1; **mp** 83-85°C; **<sup>1</sup>H NMR** (400 MHz, CDCl<sub>3</sub>) δ 7.34 (dd, *J* = 7.4, 1.4 Hz, 1H), 7.13 (app d, *J* = 8.0 Hz, 2H), 7.12 – 7.07 (comp, 4H), 7.05 (dd, *J* = 8.0, 1.2 Hz, 1H), 6.94 – 6.90 (comp, 3H), 6.81 (app t, *J* = 7.6 Hz, 1H), 6.75 – 6.73 (m, 1H), 6.69 (app td, *J* = 7.6, 0.8 Hz, 1H), 6.63 – 6.61 (m, 1H), 5.23 – 5.06 (comp, 2H), 4.83 (d, *J* = 3.2 Hz, 1H), 4.68 (d, *J* = 2.8 Hz, 1H), 3.89 (s, 3H), 2.34 (s, 3H).; **<sup>13</sup>C NMR** (100 MHz, CDCl<sub>3</sub>) δ 200.1, 163.1, 146.1, 142.9, 142.5, 136.4, 134.3, 129.5 (x 2), 128.8, 128.5, 128.1, 128.0, 125.9 (x 2), 123.2, 121.8, 121.7, 120.8, 120.3, 118.8, 118.5, 115.0, 113.7, 113.4, 91.7, 56.4, 51.7, 45.7, 21.0.;

**HRMS** (ESI, *m/z*) calcd for C<sub>30</sub>H<sub>25</sub>NNaO<sub>3</sub> [M + Na]<sup>+</sup> 470.1732, found 470.1742.

### 2-(10-(4-methoxyphenyl)-9,10-dihydroacridin-9-yl)benzofuran-3(2H)-one (3fa):

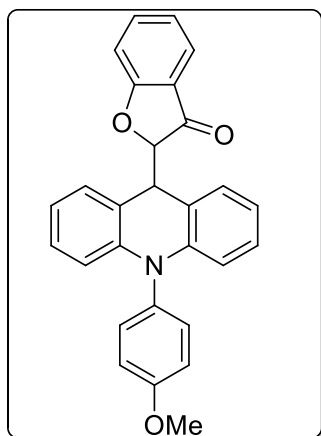

**Yield** 41% (34 mg); White solid; **R<sub>f</sub>** 0.3 (pet ether/ethyl acetate = 20:1); **eluent composition** petroleum ether/ethyl acetate = 20:1; **mp** 150-152°C; **<sup>1</sup>H NMR** (400 MHz, CDCl<sub>3</sub>) δ 7.48 (dd, *J* = 4.4, 0.4 Hz, 1H), 7.42 – 7.38 (m, 1H), 7.36 (dd, *J* = 7.2, 1.2 Hz, 1H), 7.34 – 7.30 (comp, 2H), 7.17 – 7.14 (comp, 2H), 7.08 – 7.02 (comp, 2H), 6.95 – 6.86 (comp, 3H), 6.81 (app td, *J* = 8.4 Hz, 1.6 Hz, 1H), 6.62 (td, *J* = 7.6, 1.2 Hz, 1H), 6.36 (dd, *J* = 8.4, 0.8 Hz, 1H), 6.22 (dd, *J* = 8.4, 0.8 Hz, 1H), 4.92 (d, *J* = 2.8 Hz, 1H), 4.69 (d, *J* = 2.4 Hz, 1H), 3.92 (s, 3H).; **<sup>13</sup>C NMR** (100 MHz, CDCl<sub>3</sub>) δ 200.2, 173.1, 159.2, 143.3, 143.0, 137.6, 133.3, 132.0 (X 2), 128.9, 128.5, 127.7, 127.6, 123.8, 121.9, 121.4, 120.8, 120.2, 120.1, 116.4, 115.9 (X 2), 114.3, 114.0,

112.7, 92.2, 55.5, 45.2.; **HRMS** (ESI, *m/z*) calcd for C<sub>28</sub>H<sub>21</sub>NO<sub>3</sub>Na [M + Na]<sup>+</sup> 442.1419, found 442.1419.

### 2-(10-(4-fluorophenyl)-9,10-dihydroacridin-9-yl)benzofuran-3(2H)-one (3ga):

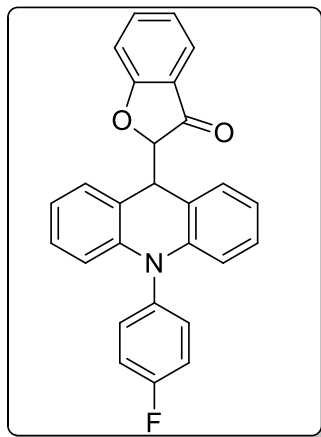

**Yield** 60% (49 mg); Red solid; **R<sub>f</sub>** 0.3 (pet ether/ethyl acetate = 20:1); **eluent composition** petroleum ether/ethyl acetate = 20:1; **mp** 150-152°C; **<sup>1</sup>H NMR** (400 MHz, CDCl<sub>3</sub>) δ 7.48 (dd, *J* = 8.1, 0.9 Hz, 1H), 7.43 – 7.35 (comp, 5H), 7.36 – 7.30 (m, 1H), 7.09 (dd, *J* = 7.6, 1.6 Hz, 1H), 7.07 – 7.03 (m, 1H), 6.96 – 6.92 (m, 1H), 6.91 – 6.87 (comp, 2H), 6.85 – 6.81 (m, 1H), 6.67 – 6.63 (m, 1H), 6.31 (dd, *J* = 8.4, 0.8 Hz, 1H), 6.18 (dd, *J* = 8.3, 0.9 Hz, 1H), 4.92 (d, *J* = 2.8 Hz, 1H), 4.69 (d, *J* = 2.8 Hz, 1H).; **<sup>13</sup>C NMR** (100 MHz, CDCl<sub>3</sub>) δ 200.1, 173.0, 162.1 (d, <sup>1</sup>*J*<sub>C-F</sub> = 246.9 Hz), 142.8 (d, <sup>2</sup>*J*<sub>C-F</sub> = 30.3 Hz), 137.6 (d, <sup>4</sup>*J*<sub>C-F</sub> = 3.0 Hz), 136.6, 132.8 (d, <sup>3</sup>*J*<sub>C-F</sub> = 8.4 Hz), 129.0, 128.7, 127.8, 127.6 (x 2), 123.8, 121.9, 121.5, 121.1 (x 2), 120.5, 120.2, 117.9, 117.6, 116.6, 114.1, 113.8, 112.6, 92.1, 45.1.; **HRMS** (ESI, *m/z*) calcd for C<sub>27</sub>H<sub>18</sub>FNNaO<sub>2</sub> [M + Na]<sup>+</sup> 430.1219, found 430.1242.

### 2-(4-methoxy-10-methyl-9,10-dihydroacridin-9-yl)benzofuran-3(2H)-one (3ha):

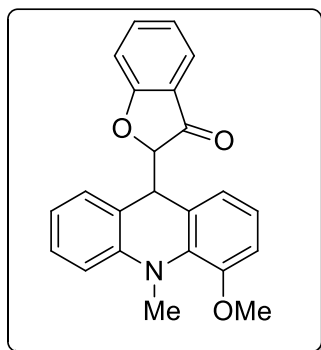

**Combined Yield** 77% (55 mg, dr 1.1:1 ); Red Jelly; **R<sub>f</sub>** 0.1 (pet ether/ethyl acetate = 20:1); **eluent composition** petroleum ether/ethyl acetate = 20:1; **<sup>1</sup>H NMR** (400 MHz, CDCl<sub>3</sub>) δ 7.50 – 7.46 (comp, 2H), 7.39 – 7.44 (comp, 2H), 7.25 – 7.23 (m, 1H), 7.09 (app d, *J* = 7.6 Hz, 1H), 7.04 – 7.00 (comp, 2H), 7.00 – 6.93 (comp, 4H), 6.92 – 6.90 (comp, 2H), 6.89 – 6.87 (comp, 2H), 6.86 – 6.83 (comp, 2H), 6.76 – 6.72 (m, 1H), 6.69 – 6.65 (m, 3H), 4.65 – 4.63 (comp, 3H), 4.58 (d, *J* = 3.2 Hz, 1H), 3.88 (s, 3H), 3.77 (s, 3H), 3.62 (s, 3H), 3.60 (s, 3H).; **<sup>13</sup>C NMR** (100 MHz, CDCl<sub>3</sub>) δ 200.0, 199.8, 173.0, 172.9, 150.4, 150.3, 147.0, 146.8, 137.6 (x 2), 134.0, 128.4, 127.9, 127.8, 127.7 (x 2), 124.7, 124.4, 123.9 (x 2), 122.5, 122.0, 121.9, 121.8, 121.6, 121.4 (x 2), 121.3, 121.2, 120.8, 120.6, 116.1, 116.0, 113.0, 112.9, 111.61, 111.56, 90.1, 90.0, 55.9, 55.86, 45.8, 45.7, 41.0, 40.9.; **HRMS** (ESI, *m/z*) calcd for C<sub>23</sub>H<sub>20</sub>NO<sub>3</sub> [M + H]<sup>+</sup> 358.1443, found 358.1429.

### 2-(2-bromo-10-methyl-9,10-dihydroacridin-9-yl)benzofuran-3(2H)-one (3ia):

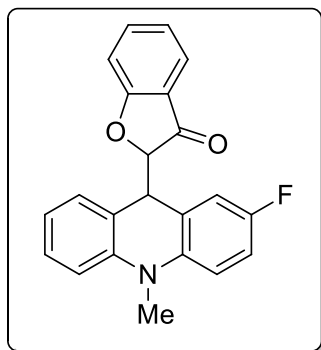

**Combined Yield** 72% (50 mg, dr 1.1:1 ); Red solid; **R<sub>f</sub>** 0.15 (pet ether/ethyl acetate = 20:1); **eluent composition** petroleum ether/ethyl acetate = 20:1; **mp** 116-118°C; **<sup>1</sup>H NMR** (600 MHz, CDCl<sub>3</sub>) δ 7.53 (d, *J* = 7.7 Hz, 1H), 7.50 – 7.48 (m, 1H), 7.47 – 7.42 (comp, 2H), 7.31 – 7.27 (comp, 2H), 7.14 – 7.11 (m, 1H), 7.07 (dd, *J* = 7.5, 1.3 Hz, 1H), 7.03 (dd, *J* = 8.4, 3.0 Hz, 1H), 7.01 – 6.98 (comp, 2H), 6.96 – 6.94 (comp, 2H), 6.94 – 6.91 (m, 1H), 6.89 – 6.88 (comp, 2H), 6.87 – 6.85 (m, 1H), 6.84 – 6.81 (comp, 3H), 6.78 – 6.74 (comp, 2H), 4.85 – 4.63 (comp, 3H), 4.56 (d, *J* = 4.5 Hz, 1H), 3.411 (s, 3H), 3.406 (s, 3H).; **<sup>13</sup>C NMR** (100 MHz, CDCl<sub>3</sub>) δ 199.7, 199.6, 172.73, 172.71, 158.5 (d, <sup>1</sup>*J*<sub>C-F</sub> = 112.8 Hz), 156.2 (d, <sup>1</sup>*J*<sub>C-F</sub> = 112.8 Hz), 143.3, 143.2, 139.9, 139.7 (d, <sup>4</sup>*J*<sub>C-F</sub> = 2.8 Hz), 137.7, 137.6, 129.04, 129.0, 128.3, 128.1, 123.9, 123.8, 123.2 (d, <sup>3</sup>*J*<sub>C-F</sub> = 26.3 Hz), 121.7, 121.6 (x 2), 121.2 (d, <sup>3</sup>*J*<sub>C-F</sub> = 30.0 Hz), 120.9, 120.7, 120.3, 118.8, 115.7, 115.4, 115.2, 114.5 (d, <sup>2</sup>*J*<sub>C-F</sub> = 48.7 Hz), 114.3 (d, <sup>2</sup>*J*<sub>C-F</sub> =

48.7 Hz), 113.2 (d,  $^2J_{C-F} = 30.0$  Hz), 113.1 (d,  $^2J_{C-F} = 26.2$  Hz), 112.84, 112.82, 112.4, 112.2, 89.2, 89.1, 46.0 (x 2), 33.5 (x 2).  $^{19}\text{F}$  NMR (376 MHz,  $\text{CDCl}_3$ )  $\delta_{\text{F}}$  -124.5 (s, 1F), -124.7 (s, 1F); **HRMS** (ESI, m/z) calcd for  $\text{C}_{22}\text{H}_{16}\text{FNO}_2$   $[\text{M} + \text{H}]^+$  346.1243, found 346.1246.

#### 4-(10-methyl-9,10-dihydroacridin-9-yl)isochroman-3-one (5aa):

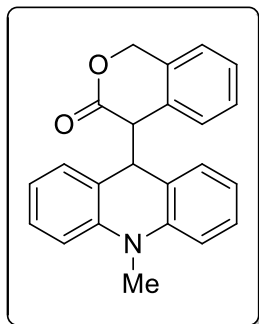

**Yield** 76% (52 mg); White solid; **R<sub>f</sub>** 0.20 (pet ether/ethyl acetate = 5:1); **eluent composition** petroleum ether/ethyl acetate = 5:1; **mp** 156-158°C;  $^1\text{H}$  NMR (400 MHz,  $\text{CDCl}_3$ )  $\delta$  7.33 (dd,  $J = 7.2$  Hz, 1.2 Hz, 1H), 7.29-7.25 (m, 1H), 7.24-7.21 (comp, 2H), 7.12 (app td,  $J = 7.6$ , 0.8 Hz, 1H), 7.06-7.02 (m, 1H), 6.99-6.92 (comp, 2H), 6.87 (app d,  $J = 7.6$  Hz, 1H), 6.69 (app d,  $J = 8.0$  Hz, 1H), 6.61 (app d,  $J = 8.0$  Hz, 1H), 6.60 (app d,  $J = 7.6$  Hz, 1H), 4.84 (d,  $J = 4.8$  Hz, 1H), 4.72 (d,  $J = 14.4$  Hz, 1H), 3.81 (d,  $J = 4.8$  Hz, 1H), 3.67 (d,  $J = 14.3$  Hz, 1H), 2.70 (s, 3H).;  $^{13}\text{C}$  NMR (100 MHz,  $\text{CDCl}_3$ )  $\delta$  172.0, 143.3 (x 2), 131.2, 130.8, 129.0, 128.8, 128.7, 128.6, 128.3, 127.4, 126.9, 123.1 (x 2), 121.6, 121.2, 121.1, 112.5, 112.0, 70.0, 55.2, 49.0, 32.8; **HRMS** (ESI, m/z) calcd for  $\text{C}_{23}\text{H}_{19}\text{NNaO}_2$   $[\text{M} + \text{Na}]^+$  364.1313, found 364.1315.

#### 4-(10-ethyl-9,10-dihydroacridin-9-yl)isochroman-3-one (5ba):

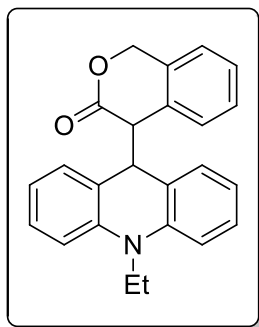

**Yield** 64% (45 mg); White solid; **R<sub>f</sub>** 0.25 (pet ether/ethyl acetate = 10:1); **eluent composition** petroleum ether/ethyl acetate = 10:1; **mp** 133-135°C;  $^1\text{H}$  NMR (400 MHz,  $\text{CDCl}_3$ )  $\delta$  7.34 (dd,  $J = 7.6$ , 1.2 Hz, 1H), 7.29 – 7.21 (comp, 3H), 7.11 (app td,  $J = 0.8$ , 7.2 Hz, 1H), 7.03 (app td,  $J = 7.6$ , 1.2 Hz, 1H), 6.96 – 6.94 (m, 1H), 6.93 – 6.91 (m, 1H), 6.84 (app d,  $J = 7.6$  Hz, 1H), 6.74 (app d,  $J = 8.4$  Hz, 1H), 6.65 (app d,  $J = 8.0$  Hz, 1H), 5.94 (d,  $J = 8.0$  Hz, 1H), 4.86 (d,  $J = 4.4$  Hz, 1H), 4.68 (d,  $J = 14.4$  Hz, 1H), 3.75 (d,  $J = 4.8$  Hz, 1H), 3.54 (d,  $J = 14.0$  Hz, 1H), 3.20 – 3.08 (m, 2H), 1.12 (t,  $J = 7.1$  Hz, 3H).;  $^{13}\text{C}$  NMR (100 MHz,  $\text{CDCl}_3$ )  $\delta$  171.8, 141.7, 141.6, 131.2, 130.2, 129.1, 128.7, 128.64, 128.58, 128.2, 127.2, 126.6, 122.8, 122.1, 120.9, 120.7, 120.4, 112.1, 111.6, 69.8, 55.7, 48.7, 40.4, 11.6.; **HRMS** (ESI, m/z) calcd for  $\text{C}_{24}\text{H}_{21}\text{NO}_2$   $[\text{M} + \text{H}]^+$  356.1651, found 356.1645.

#### 4-(10-isopentyl-9,10-dihydroacridin-9-yl)isochroman-3-one (5ca):

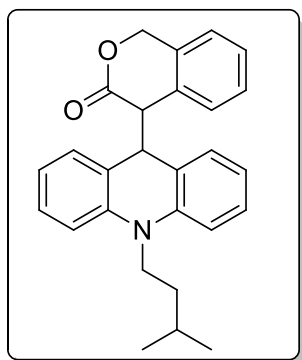

**Yield** 59% (40 mg); Brown solid; **R<sub>f</sub>** 0.30 (pet ether/ethyl acetate = 10:1); **eluent composition** petroleum ether/ethyl acetate = 10:1; **mp** 156-158°C;  $^1\text{H}$  NMR (400 MHz,  $\text{CDCl}_3$ )  $\delta$  7.32 (dd,  $J = 7.4$ , 1.4 Hz, 1H), 7.28 – 7.21 (comp, 3H), 7.13 (app td,  $J = 7.6$ , 1.2 Hz, 1H), 7.02 (app td,  $J = 7.6$ , 0.8 Hz, 1H), 6.96 (app d,  $J = 7.6$  Hz, 1H), 6.94 – 6.90 (m, 1H), 6.86 (app d,  $J = 7.6$  Hz, 1H), 6.70 (app d,  $J = 8.2$  Hz, 1H), 6.60 (app d,  $J = 8.3$  Hz, 1H), 5.94 (app d,  $J = 7.6$  Hz, 1H), 4.88 (d,  $J = 4.4$  Hz, 1H), 4.69 (d,  $J = 14.4$  Hz, 1H), 3.75 (d,  $J = 4.8$  Hz, 1H), 3.56 (d,  $J = 14.4$  Hz, 1H), 3.11 – 3.00 (m, 2H), 1.66 – 1.61 (m, 1H), 1.43 – 1.36 (m, 2H), 0.97 (d,  $J = 2.4$  Hz, 3H), 0.95 (d,  $J = 2.8$  Hz, 3H).;  $^{13}\text{C}$  NMR (100 MHz,  $\text{CDCl}_3$ )  $\delta$  171.8, 141.8, 141.7, 131.2, 130.3, 129.1, 128.8, 128.7, 128.6, 128.2, 127.2, 126.7, 122.9, 122.0, 120.8, 120.7, 120.4, 112.1, 111.6, 69.8, 55.8, 48.7, 44.7, 34.0, 26.7, 22.5.; **HRMS** (ESI, m/z) calcd for  $\text{C}_{27}\text{H}_{27}\text{NNaO}_2$   $[\text{M} + \text{Na}]^+$  420.1939, found 420.1941.

#### 4-(10-benzyl-9,10-dihydroacridin-9-yl)isochroman-3-one (5da):

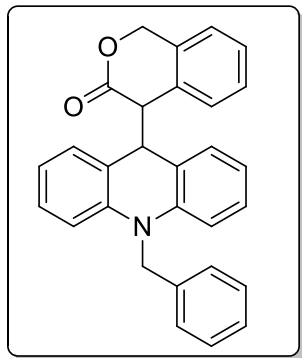

**Yield** 46% (38 mg); Colorless solid; **R<sub>f</sub>** 0.30 (pet ether/ethyl acetate = 10:1); **eluent composition** petroleum ether/ethyl acetate = 10:1; **mp** 138-140 °C; **<sup>1</sup>H NMR** (400 MHz, CDCl<sub>3</sub>) δ 7.39 (dd, *J* = 7.6, 1.6 Hz, 1H), 7.32 (dd, *J* = 7.6, 1.6 Hz, 1H), 7.24 – 7.18 (comp, 4H), 7.16 – 7.13 (comp, 2H), 7.08 – 7.05 (m, 1H), 7.04 – 7.00 (m, 1H), 6.96 (dd, *J* = 7.4, 1 Hz, 2H), 6.92 (app d, *J* = 8.8 Hz, 2H), 6.48 – 6.46 (m, 1H), 6.38 – 6.36 (m, 1H), 6.01 (app d, *J* = 7.6 Hz, 1H), 4.98 (d, *J* = 4.8 Hz, 1H), 4.71 (d, *J* = 14.4 Hz, 1H), 4.16 (AB q, *J* = 16.8 Hz, 2H), 3.85 (d, *J* = 4.4 Hz, 1H), 3.51 (d, *J* = 14.4 Hz, 1H); **<sup>13</sup>C NMR** (100 MHz, CDCl<sub>3</sub>)

δ 171.8, 142.9, 142.3, 136.6, 131.3, 130.3, 128.8, 128.73 (x 3), 128.70, 128.5, 128.3, 127.4, 126.9, 126.7, 125.7 (x 2), 123.0, 122.8, 121.5, 121.4, 121.0, 113.4, 112.9, 69.8, 55.8, 50.9, 48.7.; **HRMS** (ESI, *m/z*) calcd for C<sub>29</sub>H<sub>23</sub>NO<sub>2</sub> [M + H]<sup>+</sup> 418.1807, found 418.1806.

#### 4-(10-pentyl-9,10-dihydroacridin-9-yl)isochroman-3-one (5ja):

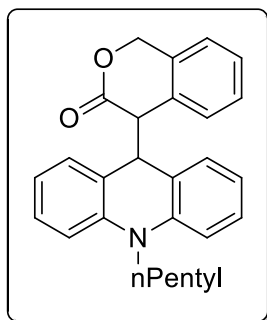

**Yield** 38% (30 mg); Brown solid; **R<sub>f</sub>** 0.20 (pet ether/ethyl acetate = 10:1); **eluent composition** petroleum ether/ethyl acetate = 10:1; **mp** 156-158 °C; **<sup>1</sup>H NMR** (400 MHz, CDCl<sub>3</sub>) δ 7.32 (dd, *J* = 7.4, 1.4 Hz, 1H), 7.27 – 7.20 (comp, 3H), 7.11 (app td, *J* = 7.6, 0.8 Hz, 1H), 7.02 (app td, *J* = 7.6, 0.8 Hz, 1H), 6.95 – 6.89 (comp, 2H), 6.85 (app d, *J* = 7.2 Hz, 1H), 6.68 (app d, *J* = 8.4 Hz, 1H), 6.59 (app d, *J* = 8.4 Hz, 1H), 5.92 (d, *J* = 7.6 Hz, 1H), 4.88 (d, *J* = 4.8 Hz, 1H), 4.68 (d, *J* = 14.4 Hz, 1H), 3.73 (d, *J* = 4.8 Hz, 1H), 3.54 (d, *J* = 14.4 Hz, 1H), 3.06 – 2.92 (m, 2H), 1.56 – 1.47 (m,

2H), 1.39 – 1.25 (comp, 4H), 0.92 (t, *J* = 7.2 Hz, 3H); **<sup>13</sup>C NMR** (100 MHz, CDCl<sub>3</sub>) δ 172.1, 142.0, 141.9, 131.3, 130.3, 129.2, 128.9, 128.8, 128.7, 128.3, 127.4, 126.8, 123.0, 122.1, 121.0, 120.8, 120.4, 112.3, 111.8, 69.9, 55.9, 48.8, 46.3, 29.2, 25.4, 22.6, 14.3; **HRMS** (ESI, *m/z*) calcd for C<sub>27</sub>H<sub>27</sub>NNaO<sub>2</sub> [M + Na]<sup>+</sup> 420.1939, found 420.1925.

#### 4-(10-butyl-9,10-dihydroacridin-9-yl)isochroman-3-one (5ka):

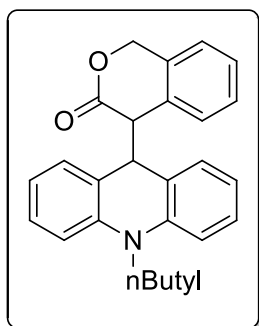

**Yield** 40% (31 mg); White solid; **R<sub>f</sub>** 0.1 (pet ether/ethyl acetate = 20:1); **eluent composition** petroleum ether/ethyl acetate = 10:1; **mp** 122-124 °C; **<sup>1</sup>H NMR** (400 MHz, CDCl<sub>3</sub>) δ 7.33 (dd, *J* = 7.6, 1.6 Hz, 1H), 7.28 – 7.21 (comp, 3H), 7.12 (app td, *J* = 7.6, 1.2 Hz, 1H), 7.03 (app td, *J* = 7.2, 1.2 Hz, 1H), 6.96 – 6.90 (comp, 2H), 6.85 (app d, *J* = 7.6 Hz, 1H), 6.70 (app d, *J* = 8.4 Hz, 1H), 6.60 (app d, *J* = 8.4 Hz, 1H), 5.94 (d, *J* = 7.6 Hz, 1H), 4.88 (d, *J* = 4.8 Hz, 1H), 4.69 (d, *J* = 14.4 Hz, 1H), 3.75 (d, *J* = 4.8 Hz, 1H), 3.56 (d, *J* = 14.4 Hz, 1H), 3.08 – 2.94 (m, 2H), 1.53 – 1.46 (m, 2H), 1.34 (comp, 2H), 0.96 (t, *J* = 7.3 Hz, 3H). ; **<sup>13</sup>C NMR** (100 MHz, CDCl<sub>3</sub>)

δ 171.9, 141.8, 141.7, 131.1, 130.2, 129.1, 128.7, 128.63, 128.57, 128.2, 127.2, 126.6, 122.8, 121.9, 120.9, 120.7, 120.3, 112.1, 111.6, 69.8, 55.7, 48.6, 45.9, 27.6, 20.1, 13.8.; **HRMS** (ESI, *m/z*) calcd for C<sub>26</sub>H<sub>25</sub>NNaO<sub>2</sub> [M + Na]<sup>+</sup> 406.1783, found 406.1763.



#### 4-(10-phenyl-9,10-dihydroacridin-9-yl)isochroman-3-one (5la):

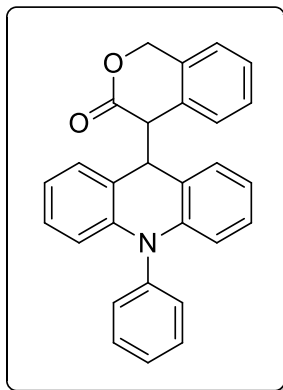

Yield 40% (32 mg) Colorless solid;  $R_f$  0.30 (pet ether/ethyl acetate = 10:1); **eluent composition** petroleum ether/ethyl acetate = 10:1; **mp** 160-162 °C;  $^1\text{H NMR}$  (400 MHz,  $\text{CDCl}_3$ )  $\delta$  7.47 – 7.43 (comp, 2H), 7.42 – 7.37 (comp, 3H), 7.30 (app td,  $J = 7.6, 0.8$  Hz, 1H), 7.06 – 6.96 (comp, 5H), 6.93 (app td,  $J = 7.6, 1.2$  Hz, 1H), 6.52 – 6.50 (comp, 2H), 6.04 – 6.00 (comp, 2H), 5.93 – 5.90 (m, 1H), 5.17 (d,  $J = 4.4$  Hz, 1H), 4.70 (d,  $J = 14.0$  Hz, 1H), 3.94 (d,  $J = 4.4$  Hz, 1H), 3.56 (d,  $J = 14.4$  Hz, 1H).;  $^{13}\text{C NMR}$  (100 MHz,  $\text{CDCl}_3$ )  $\delta$  172.0, 142.7, 139.6, 131.7, 130.7 (x 3), 130.6 (x 3), 129.2, 129.0, 128.7, 128.23, 128.20, 127.8, 127.4, 127.2, 123.6, 121.3, 121.2, 119.8, 118.5, 113.9, 113.5, 69.9, 56.5, 48.3.; **HRMS** (ESI, m/z) calcd for  $\text{C}_{28}\text{H}_{21}\text{NNaO}_2$  [ $\text{M} + \text{Na}$ ] $^+$  426.1470, found 426.1469.

#### 4-(2-methoxy-10-methyl-9,10-dihydroacridin-9-yl)isochroman-3-one (5ma):

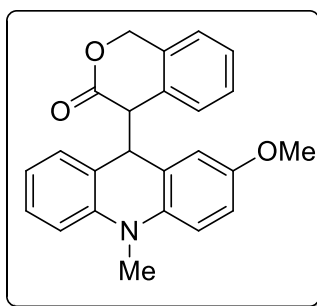

Yield 54% (40 mg, dr 1:1) White solid;  $R_f$  0.20 (pet ether/ethyl acetate = 10:1); **mp** 150-152 °C;  $^1\text{H NMR}$  (400 MHz,  $\text{CDCl}_3$ )  $\delta$  7.28 – 7.24 (comp, 3H), 7.21 (d,  $J = 7.2$  Hz, 1H), 7.15-7.10 (comp, 2H), 7.01 – 6.96 (comp, 3H), 6.92 – 6.81 (comp, 6H), 6.77 (d,  $J = 2.8$  Hz, 1H), 6.66 (d,  $J = 8.1$  Hz, 1H), 6.62 (d,  $J = 8.8$  Hz, 1H), 6.56 (d,  $J = 8.9$  Hz, 1H), 6.12 (d,  $J = 7.6$  Hz, 1H), 6.08 (d,  $J = 7.6$  Hz, 1H), 4.82 (d,  $J = 4.7$  Hz, 1H), 4.79 (d,  $J = 6.2$  Hz, 1H), 4.76 (d,  $J = 2.9$  Hz, 1H), 4.72 (d,  $J = 14.4$  Hz, 1H), 3.86-3.80 (comp, 6H), 3.77 (s, 3H), 3.64 (d,  $J = 14.3$  Hz, 1H), 2.71 (s, 3H), 2.65 (s, 3H).;  $^{13}\text{C NMR}$  (100 MHz,  $\text{CDCl}_3$ )  $\delta$  171.9, 171.7, 154.5, 154.3, 143.4, 137.4, 131.1, 130.8, 130.5, 128.7 (x 3), 128.5, 128.4, 128.1, 127.2 (x 3), 126.8, 126.7, 123.9, 123.0, 122.9, 122.4, 122.1, 120.6, 120.51, 120.46 (x 2), 114.8, 114.1, 113.4 (x 2), 113.3, 113.1, 112.8, 112.1, 111.5, 69.9 (x 2), 55.9, 55.8, 54.8 (x 2), 49.2, 49.1, 32.71, 32.68.; **HRMS** (ESI, m/z) calcd for  $\text{C}_{24}\text{H}_{21}\text{NNaO}_3$  [ $\text{M} + \text{Na}$ ] $^+$  394.1419, found 394.1423.

#### 5-hydroxy-2-(10-methyl-9,10-dihydroacridin-9-yl)benzofuran-3(2H)-one (6aa):

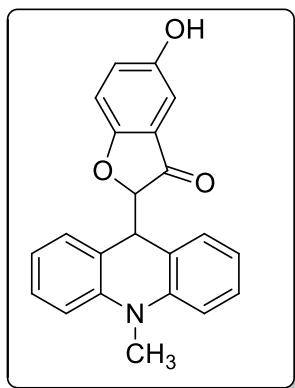

Yield 58% (40 mg); Green solid;  $R_f$  0.3 (pet ether/ethyl acetate = 5:1); **mp** 140-142 °C;  $^1\text{H NMR}$  (400 MHz,  $\text{CDCl}_3$ )  $\delta$  7.35 – 7.29 (m, 2H), 7.17 – 7.12 (m, 2H), 7.04 – 7.01 (m, 1H), 6.93 (d,  $J = 8.0$  Hz, 1H), 6.86 (app td,  $J = 7.6, 0.8$  Hz, 1H), 6.68 – 6.63 (comp, 2H), 6.57 (dd,  $J = 8.4, 2.4$  Hz, 1H), 6.03 (d,  $J = 2.4$  Hz, 1H), 4.80 (d,  $J = 4.4$  Hz, 1H), 3.80 (d,  $J = 4.4$  Hz, 1H), 3.18 (s, 3H).;  $^{13}\text{C NMR}$  (100 MHz,  $\text{CDCl}_3$ )  $\delta$  176.0, 151.6, 147.6, 143.0, 142.6, 128.9 (X 2), 128.8 (X 2), 128.3, 128.1, 125.8, 122.7, 121.0, 120.6 (X 2), 120.5, 115.1, 112.8, 112.6 (X 2), 112.3, 110.2 (X 2), 53.3, 45.8, 33.1.; **HRMS** (ESI, m/z) calcd for  $\text{C}_{27}\text{H}_{17}\text{NNaO}_3$  [ $\text{M} + \text{Na}$ ] $^+$  366.1106, found 366.1129.

### 2-(10-methyl-9,10-dihydroacridin-9-yl)dihydrofuran-3(2H)-one (6ab):

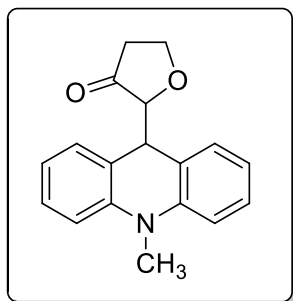

**Yield** 41% (25 mg); Yellow solid; **R<sub>f</sub>** 0.20 (pet ether/ethyl acetate = 20:1); **eluent composition** petroleum ether/ethyl acetate = 20:1; **mp** 96-98 °C **<sup>1</sup>H NMR** (400 MHz, CDCl<sub>3</sub>) δ 7.28 – 7.22 (comp, 3H), 7.15 (dd, *J* = 7.6, 1.3 Hz, 1H), 7.01 – 6.97 (m, 1H), 6.94 – 6.91 (comp, 3H), 4.62 (d, *J* = 4.4 Hz, 1H), 4.05 (app t, *J* = 8.8 Hz, 1H), 3.89 (d, *J* = 17.0 Hz, 1H), 3.70 (app t, *J* = 9.2 Hz, 1H), 3.47 (d, *J* = 17.0 Hz, 1H), 3.39 (s, 1H), 2.69 (m, 1H).; **<sup>13</sup>C NMR** (100 MHz, CDCl<sub>3</sub>) δ 214.6, 143.5, 142.7, 128.9, 128.1, 127.9, 127.6, 125.2, 122.7, 121.1, 121.0, 112.3, 112.2, 71.3, 68.8, 55.6, 41.3, 33.0.; **HRMS** (ESI, *m/z*) calcd for C<sub>18</sub>H<sub>17</sub>NO<sub>2</sub> [M + H]<sup>+</sup> 280.1338, found 280.1339.

### 2-(10-methyl-9,10-dihydroacridin-9-yl)-2,3-dihydro-1H-inden-1-one (6ac):

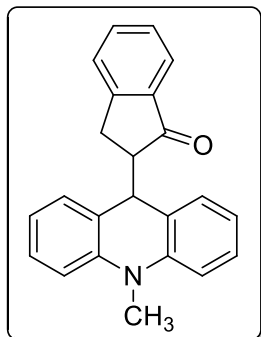

**Yield** 40% (26 mg); White solid; **R<sub>f</sub>** 0.2 (pet ether/ethyl acetate = 20:1); **eluent composition** petroleum ether/ethyl acetate = 20:1; **mp** 160-165 °C **<sup>1</sup>H NMR** (400 MHz, CDCl<sub>3</sub>) δ 7.70 (app d, *J* = 7.6 Hz, 1H), 7.44 (app td, *J* = 7.2, 0.8 Hz, 1H), 7.33 (dd, *J* = 7.6, 1.2 Hz, 1H), 7.28 – 7.23 (comp, 3H), 7.15 – 7.08 (comp, 2H), 7.00 (app td, *J* = 7.2, 0.8 Hz, 1H), 6.94 (app d, *J* = 8.0 Hz, 1H), 6.85 (app d, *J* = 8.0 Hz, 1H), 6.76 (app td, *J* = 7.6, 0.8 Hz, 1H), 4.93 (d, *J* = 3.6 Hz, 1H), 3.40 (s, 3H), 2.99 – 2.96 (m, 1H), 2.92 – 2.89 (m, 2H).; **<sup>13</sup>C NMR** (100 MHz, CDCl<sub>3</sub>) δ 206.4, 154.2, 143.4, 142.9, 136.8, 134.4, 129.6, 128.5, 127.4, 127.3, 127.0, 126.2, 126.0, 123.7, 122.9, 121.0, 120.7, 112.13, 112.10, 58.0, 42.8, 33.0, 28.5.; **HRMS** (ESI, *m/z*) calcd for C<sub>23</sub>H<sub>19</sub>NNaO [M + Na]<sup>+</sup> 348.1364, found 348.1362.

### 6-methyl-2-(10-methyl-9,10-dihydroacridin-9-yl)-2,3-dihydro-1H-inden-1-one (6ad):

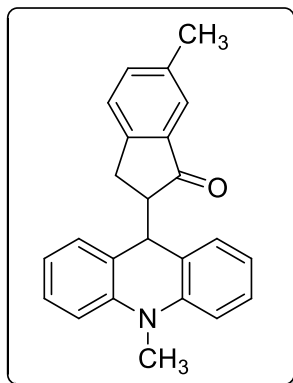

**Yield** 35% (24 mg); White solid; **R<sub>f</sub>** 0.2 (pet ether/ethyl acetate = 20:1); **eluent composition** petroleum ether/ethyl acetate = 20:1; **mp** 130-132 °C **<sup>1</sup>H NMR** (400 MHz, CDCl<sub>3</sub>) **<sup>1</sup>H NMR** (400 MHz, Chloroform-d) δ 7.50 (app s, 1H), 7.32 (dd, *J* = 7.4, 1 Hz, 1H), 7.25 – 7.22 (comp, 2H), 7.14 – 7.08 (comp, 3H), 6.99 (app td, *J* = 7.6, 0.8 Hz, 1H), 6.93 (app d, *J* = 8.4 Hz, 1H), 6.84 (app d, *J* = 8.0 Hz, 1H), 6.78 – 6.74 (m, 1H), 4.92 (d, *J* = 3.6 Hz, 1H), 3.40 (s, 3H), 2.98 – 2.94 (m, 1H), 2.84 (t, *J* = 6.4 Hz, 2H), 2.34 (s, 3H).; **<sup>13</sup>C NMR** (100 MHz, CDCl<sub>3</sub>) δ 206.5, 151.6, 143.4, 142.9, 137.0, 136.9, 135.7, 129.6, 128.5, 127.4, 127.2, 126.1, 125.9, 123.7, 123.0, 121.0, 120.7, 112.1 (x 2), 58.3, 42.7, 33.0, 28.1, 21.0.; **HRMS** (ESI, *m/z*) calcd for C<sub>24</sub>H<sub>21</sub>NNaO [M + Na]<sup>+</sup> 362.1521, found 362.1537.

### 2-(10-methyl-9,10-dihydroacridin-9-yl)-2-nitro-1-phenylethanone (6ae):

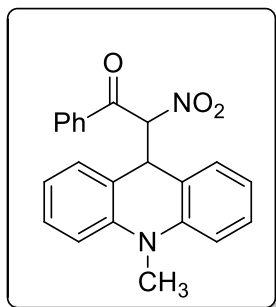

**Yield** 56% (40 mg); Yellow solid; **R<sub>f</sub>** 0.15 (pet ether/ethyl acetate = 20:1); **eluent composition** petroleum ether/ethyl acetate = 20:1; **mp** 132-134 °C **<sup>1</sup>H NMR** (400 MHz, CDCl<sub>3</sub>) δ 7.64 (d, *J* = 1.2 Hz, 1H), 7.62 (d, *J* = 1.2 Hz, 1H), 7.50 – 7.46 (m, 1H), 7.37 – 7.33 (m, 1H), 7.34 – 7.28 (comp, 3H), 7.20 (dd, *J* = 7.6 Hz, 1.2 Hz, 1H), 7.08 – 7.00 (comp, 3H), 6.84 (d, *J* = 8.0 Hz, 1H), 6.77 (app td, *J* = 7.6, 0.8 Hz, 1H), 6.25 (d, *J* = 10.0 Hz, 1H), 5.29 (d, *J* = 10 Hz, 1H), 3.46 (s, 3H).; **<sup>13</sup>C NMR** (100 MHz, CDCl<sub>3</sub>) δ 188.0, 143.5, 143.0, 135.0, 134.2, 129.9, 128.9, 128.6 (x 2), 128.6 (x 3), 128.4, 121.8, 121.4 (x 2), 119.4, 112.6, 112.5, 88.0, 45.8, 33.1.; **HRMS** (ESI, *m/z*) calcd for C<sub>22</sub>H<sub>18</sub>N<sub>2</sub>O<sub>3</sub> [M]<sup>+</sup> 358.1317, found 358.1313.

### Methyl 2-(10-methyl-9,10-dihydroacridin-9-yl)-3-oxobutanoate (6af):

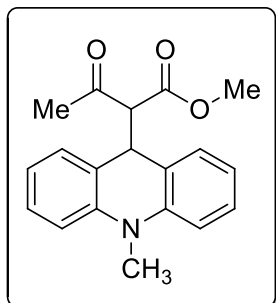

**Yield** 71% (44 mg); White solid; **R<sub>f</sub>** 0.2 (pet ether/ethyl acetate = 20:1); **eluent composition** petroleum ether/ethyl acetate = 20:1; **mp** 126-128 °C **<sup>1</sup>H NMR** (400 MHz, CDCl<sub>3</sub>) δ 7.29 – 7.19 (comp, 4H), 6.98 – 6.91 (comp, 4H), 4.79 (d, *J* = 10.4 Hz, 1H), 3.89 (d, *J* = 10.4 Hz, 1H), 3.52 (s, 3H), 3.45 (s, 3H), 1.79 (s, 3H).; **<sup>13</sup>C NMR** (100 MHz, CDCl<sub>3</sub>) δ 202.2, 167.9, 143.0, 129.0, 128.6, 127.7, 127.6, 123.7, 123.3, 121.0, 120.9, 112.3 (X 3), 62.1, 52.2, 44.1, 33.1, 31.5.; **HRMS** (ESI, *m/z*) calcd for C<sub>19</sub>H<sub>19</sub>NNaO<sub>3</sub> [M + Na]<sup>+</sup> 332.1263, found 332.1284.

### Ethyl 2-(10-methyl-9,10-dihydroacridin-9-yl)-3-oxobutanoate (6ag):

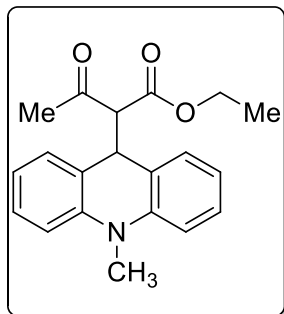

**Yield** 46% (30 mg); White solid; **R<sub>f</sub>** 0.25 (pet ether/ethyl acetate = 10:1); **eluent composition** petroleum ether/ethyl acetate = 10:1; **mp** 116-118 °C **<sup>1</sup>H NMR** (400 MHz, CDCl<sub>3</sub>) δ 7.29 (dd, *J* = 7.4, 1.4 Hz, 1H), 7.25 – 7.20 (comp, 3H), 6.98 – 6.91 (comp, 4H), 4.79 (d, *J* = 10.4 Hz, 1H), 4.00 - 3.92 (m, 2H), 3.86 (d, *J* = 10.4 Hz, 1H), 3.45 (s, 3H), 1.81 (s, 3H), 1.07 (q, *J* = 7.2 Hz, 3H).; **<sup>13</sup>C NMR** (100 MHz, CDCl<sub>3</sub>) δ 202.2, 167.5, 143.1, 143.0, 129.0, 128.7, 127.6, 127.6, 123.8, 123.5, 121.0, 120.9, 112.3, 112.2, 62.3, 61.2, 44.0, 33.1, 31.3, 13.9.; **HRMS** (ESI, *m/z*) calcd for C<sub>20</sub>H<sub>21</sub>N<sub>2</sub>NaO<sub>3</sub> [M + Na]<sup>+</sup> 346.1419, found 346.1429.

### Ethyl 2-(10-methyl-9,10-dihydroacridin-9-yl)-2-nitroacetate (6ah):

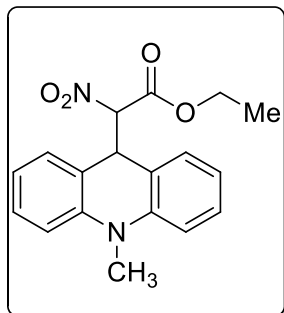

**Yield** 69% (45 mg); Colourless solid; **R<sub>f</sub>** 0.1 (pet ether/ethyl acetate = 20:1); **eluent composition** petroleum ether/ethyl acetate = 20:1; **mp** 128-130 °C **<sup>1</sup>H NMR** (400 MHz, CDCl<sub>3</sub>) δ 7.33 – 7.28 (comp, 4H), 7.02 – 6.96 (comp, 4H), 5.16 – 5.04 (comp, 2H), 4.11 – 3.94 (m, 2H), 3.47 (s, 3H), 1.07 (t, *J* = 7.1 Hz, 3H).; **<sup>13</sup>C NMR** (100 MHz, CDCl<sub>3</sub>) δ 163.0, 143.3, 142.7, 129.1, 128.8, 128.7 (x 2), 121.6, 121.2, 120.7, 119.4, 112.6 (x 2), 88.8, 62.8, 45.6, 33.2, 13.6.; **HRMS** (ESI, *m/z*) calcd for C<sub>18</sub>H<sub>18</sub>N<sub>2</sub>KO<sub>2</sub> [M + K]<sup>+</sup> 365.0904, found 365.0930.

### Ethyl 2-cyano-2-(10-methyl-9,10-dihydroacridin-9-yl)acetate (6ai):

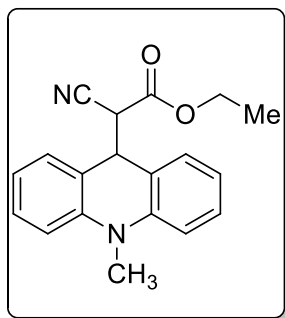

**Yield** 65% (40 mg); Yellow solid; **R<sub>f</sub>** 0.10 (pet ether/ethyl acetate = 10:1); **eluent composition** petroleum ether/ethyl acetate = 10:1; **mp** 68-70 °C **<sup>1</sup>H NMR** (400 MHz, CDCl<sub>3</sub>) δ 7.39 – 7.28 (comp, 3H), 7.18 (dd, *J* = 7.2, 1.2 Hz, 1H), 7.06 – 6.94 (comp, 4H), 4.66 (d, *J* = 8.8 Hz, 1H), 4.12 – 4.00 (m, 2H), 3.54 (d, *J* = 8.8 Hz, 1H), 3.45 (s, 3H), 1.14 (t, *J* = 7.2 Hz, 3H).; **<sup>13</sup>C NMR** (100 MHz, CDCl<sub>3</sub>) δ 164.9, 142.7, 142.5, 128.9, 128.7 (x 2), 128.3, 121.2, 121.15, 121.07, 121.0, 115.6, 112.8, 112.7, 62.6, 45.5, 43.7, 33.2, 13.8.; **HRMS** (ESI, *m/z*) calcd for

C<sub>19</sub>H<sub>18</sub>N<sub>2</sub>O<sub>2</sub> [M + H]<sup>+</sup> 307.1447, found 307.1450.

### Diethyl 2-(10-methyl-9,10-dihydroacridin-9-yl)malonate (6aj):

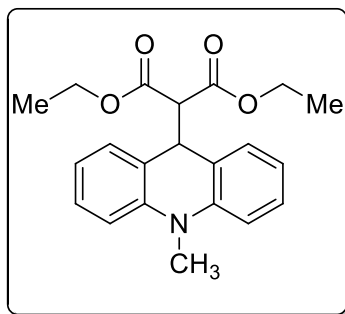

**Yield** 63% (44 mg); Brown solid; **R<sub>f</sub>** 0.30 (pet ether/ethyl acetate = 10:1); **eluent composition** petroleum ether/ethyl acetate = 10:1; **mp** 70-72 °C **<sup>1</sup>H NMR** (400 MHz, CDCl<sub>3</sub>) δ 7.28 (dd, *J* = 7.4, 1.5 Hz, 2H), 7.26 – 7.21 (comp, 2H), 6.98 – 6.90 (comp, 4H), 4.77 (d, *J* = 10.6 Hz, 1H), 4.04 – 3.89 (comp, 4H), 3.58 (d, *J* = 10.6 Hz, 1H), 3.44 (s, 3H), 1.06 (t, *J* = 7.1 Hz, 6H).; **<sup>13</sup>C NMR** (100 MHz, CDCl<sub>3</sub>) δ 167.7, 143.1, 128.8, 127.8, 123.7, 120.8, 112.3, 61.3, 56.0, 44.2, 33.2, 14.0.; **HRMS** (ESI, *m/z*) calcd for C<sub>21</sub>H<sub>23</sub>NNaO<sub>4</sub> [M + Na]<sup>+</sup>

376.1525, found 376.1537.

### 2-(10-methylacridin-9(10H)-ylidene)benzofuran-3(2H)-one (7):

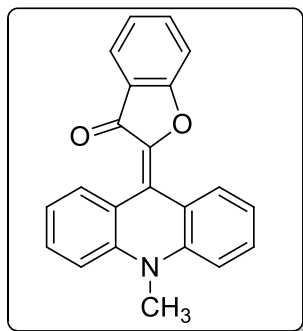

**Yield** 58% (38 mg); Red solid; **R<sub>f</sub>** 0.10 (pet ether/ethyl acetate = 10:1); **eluent composition** petroleum ether/ethyl acetate = 10:1; **mp** 128-130 °C, **<sup>1</sup>H NMR** (400 MHz, CDCl<sub>3</sub>) δ 8.43 (dd, *J* = 8.0, 1.2 Hz, 2H), 7.81 (d, *J* = 7.6 Hz, 1H), 7.56 – 7.53 (comp, 3H), 7.31 – 7.25 (comp, 5H), 7.17 – 7.14 (m, 1H), 3.74 (s, 3H).; **<sup>13</sup>C NMR** (100 MHz, CDCl<sub>3</sub>) δ 163.3, 141.5, 139.9, 134.7 (X 2), 130.8 (X 2), 130.7 (X 2), 124.1 (X 2), 123.9, 122.5 (X 2), 120.4 (X 2), 112.8 (X 3), 112.4 (X 2), 34.4.; **HRMS** (ESI, *m/z*) calcd for C<sub>22</sub>H<sub>15</sub>NO<sub>2</sub> [M + H]<sup>+</sup> 326.1181, found 326.1179.

### 3aa-d<sub>1</sub>:

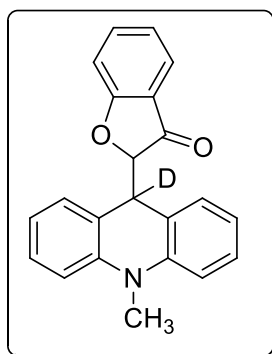

**Yield** 61% (40 mg); Yellow solid; **R<sub>f</sub>** 0.30 (pet ether/ethyl acetate = 10:1); **eluent composition** petroleum ether/ethyl acetate = 10:1; **mp** 133-135 °C **<sup>1</sup>H NMR** (400 MHz, CDCl<sub>3</sub>) δ 7.51 (dd, *J* = 7.6, 0.8 Hz, 1H), 7.45 – 7.40 (m, 1H), 7.31 – 7.25 (comp, 2H), 7.13 – 7.08 (comp, 2H), 7.03 – 6.95 (comp, 2H), 6.93 – 6.89 (m, 1H), 6.85 (dd, *J* = 13.3, 8.2 Hz, 2H), 6.76 (app td, *J* = 7.4, 1.0 Hz, 1H), 4.61 (s, 1H), 3.44 (s, 3H).; **<sup>13</sup>C NMR** (100 MHz, CDCl<sub>3</sub>) δ 200.0, 172.8, 143.4, 143.2, 137.5, 129.0, 128.9, 128.1, 127.9, 123.8, 121.8, 121.7, 121.4, 120.6, 120.2, 119.5, 112.8, 112.4, 112.3, 89.7, 50.0 – 45.3 (m), 33.2.; **HRMS** (ESI, *m/z*) calcd for

C<sub>22</sub>H<sub>16</sub>DNO<sub>2</sub> [M + H]<sup>+</sup> 329.1416, found 329.1393.

**10-(4-methoxybenzyl)acridin-9(10H)-one (9):**

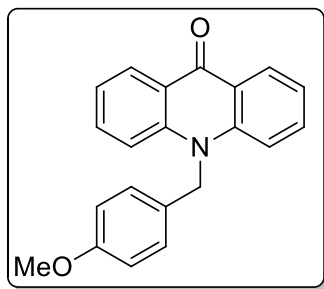

**Yield** 50% (30 mg); **Brown solid**; **R<sub>f</sub>** 0.20 (pet ether/ethyl acetate = 5:1); **eluent composition** petroleum ether/ethyl acetate = 5:1; **<sup>1</sup>H NMR** (400 MHz, CDCl<sub>3</sub>) δ 8.60 (dd, *J* = 8.0, 1.6 Hz, 1H), 7.66 – 7.62 (comp, 2H), 7.38 (d, *J* = 8.7 Hz, 1H), 7.32 – 7.28 (comp, 2H), 7.13 (d, *J* = 8.7 Hz, 2H), 6.89 – 6.87 (comp, 2H), 5.55 (s, 2H), 3.78 (s, 3H).; **<sup>13</sup>C NMR** (100 MHz, CDCl<sub>3</sub>) δ 178.3, 159.2, 142.6 (X 2), 134.0 (X 2), 127.8 (X 2), 127.2, 126.8 (X 2), 122.6 (X 2), 121.6 (X 2), 115.2 (X 2), 114.6 (X 2), 55.3, 50.3; **HRMS** (ESI, *m/z*) calcd for

C<sub>21</sub>H<sub>17</sub>NO<sub>2</sub> [M + H]<sup>+</sup> 316.1338, found 316.1334.

**9H-xanthen-9-oneone (10):**

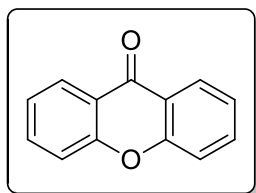

**Yield** 31% (12 mg); **White solid**; **R<sub>f</sub>** 0.30 (pet ether/ethyl acetate = 5:1); **eluent composition** petroleum ether/ethyl acetate = 5:1; **<sup>1</sup>H NMR** (400 MHz, CDCl<sub>3</sub>) δ 8.35 (dd, *J* = 8.0, 1.7 Hz, 2H), 7.74 (ddd, *J* = 8.7, 7.1, 1.7 Hz, 2H), 7.51 (d, *J* = 8.4 Hz, 2H), 7.42 – 7.36 (comp, 2H).

## Mechanistic studies:

### Radical scavenging experiments:

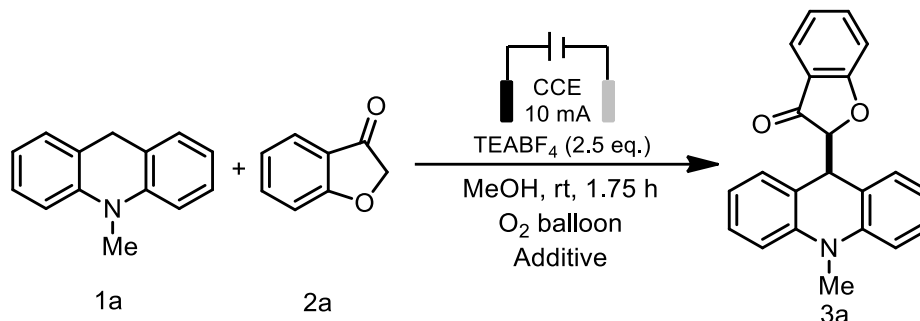

| Exp. No | Additive | Equiv. | Yield of <b>3a</b> |
|---------|----------|--------|--------------------|
| 1       | -        | -      | 84%                |
| 2       | TEMPO    | 2.0    | 82%                |
| 3       | BHT      | 2.0    | 82%                |

A 5 mL oven-dried electrosyn vial was charged with 10-methyl-9,10-dihydroacridine **1a** (39 mg, 0.2 mmol), 3-coumaranone **2a** (35 mg, 0.26 mmol), TEABF<sub>4</sub> (0.5 mmol, 2.5 equiv.), radical scavengers (2 equiv.) and MeOH (2.0 mL). The vial was equipped with a graphite rod as anode (immersed surface area 1.2 x 0.5 cm<sup>2</sup>) and platinum plate as the cathode (immersed surface area 1.2 x 0.5 cm<sup>2</sup>), the distance between the electrodes was 0.6 cm. The resulting mixture was stirred and electrolyzed at a constant current of 10 mA at ambient temperature for 1.75 h. with O<sub>2</sub>-balloon. After completion of the reaction indicated by TLC the volatiles was evaporated in vacuum and the crude product was directly purified by column chromatography using ethyl acetate / petroleum ether (5%) to afford product **3aa**.

### Control potential experiment:

b) controll potential Experiment

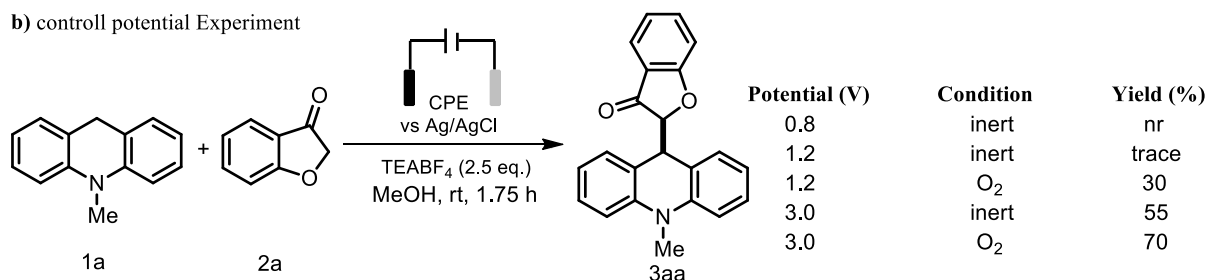

A 5 mL oven-dried electrosyn vial was charged with 10-methyl-9,10-dihydroacridine **1a** (39 mg, 0.2 mmol), 3-coumaranone **2a** (35 mg, 0.26 mmol), TEABF<sub>4</sub> (0.5 mmol, 2.5 equiv.) and MeOH (2.0 mL). The vial was equipped with a graphite rod as anode, platinum plate as the cathode and Ag/AgCl as reference electrode. The resulting mixture was stirred and electrolyzed at a constant potential at room temperature for 1.75 h. After completion of the reaction indicated by TLC the volatiles was evaporated in vacuum and the crude product was directly purified by column chromatography using ethyl acetate / petroleum ether (5%) to afford product **3aa**.

### Cyclic voltammetry experiments:

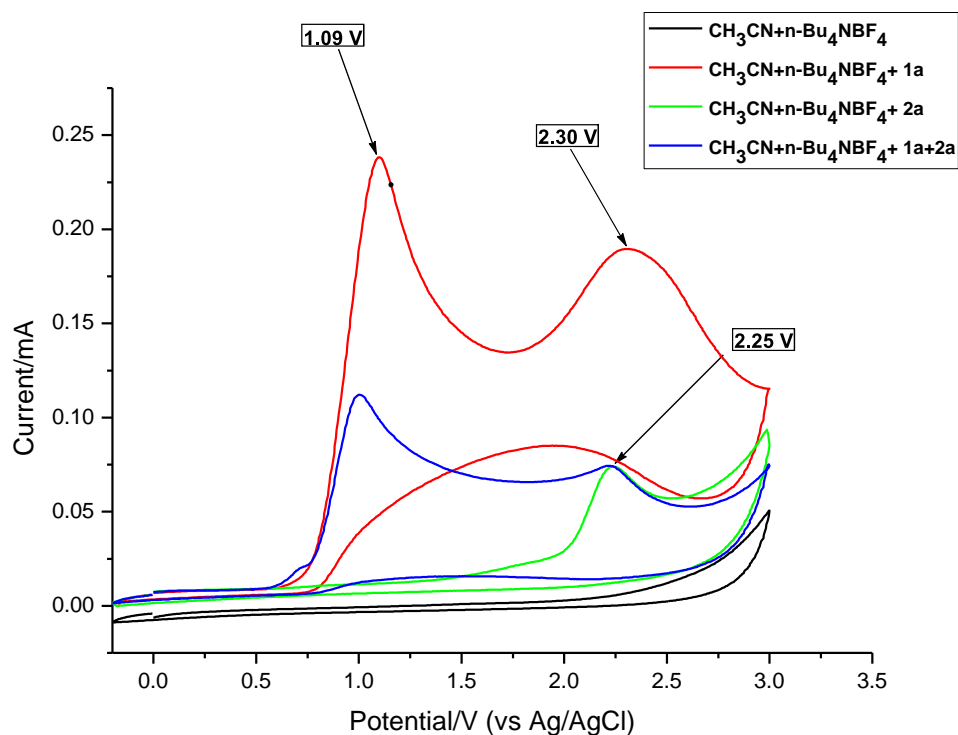

**Figure S5.** Cyclic Voltammogram recorded with K-Lite 1.2 work workstation at room temperature in MeCN with 0.04 M TBABF<sub>4</sub> and 1a (20 mM), 2a (20 mM), 1a+2a (20 mM). A glassy-carbon disk was used as a working electrode. Pt-disk and Ag/AgCl was used as counter and reference electrode, respectively. Sweep rate was 50 mV/s.

### Kinetic isotope effect experiment:

Kinetic isotope experiments (KIE) were performed between acridine (1a) and acridine-d<sub>2</sub> (1a-d<sub>2</sub>) to check whether the C–H abstraction step of the reaction is involved in the rate-determining step (rds) of the reaction or not. Intermolecular competitive experiment suggested a high k<sub>H</sub>/k<sub>D</sub> value of 5.25 from <sup>1</sup>H NMR spectroscopy. This result indicated that the C–H cleavage step might be involved in the rate-determining step of the reaction.

### Procedure for competitive experiment between 1a and 1a-d<sub>2</sub>:

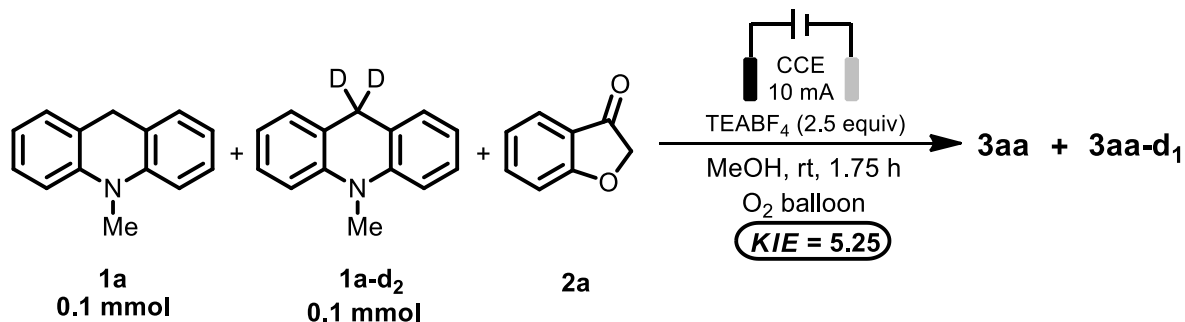

A 5 mL oven-dried electrosyn vial was charged with 10-methyl-9,10-dihydroacridine **1a** (39 mg, 0.2 mmol), 3-coumaranone **2a** (35 mg, 0.26 mmol), TEABF<sub>4</sub> (0.5 mmol, 2.5 equiv,) and MeOH (2.0 mL). The vial was equipped with graphite rod as anode (immersed surface area 1.2 x 0.5 cm<sup>2</sup>)

and platinum plate as the cathode (immersed surface area  $1.2 \times 0.5 \text{ cm}^2$ ), the distance between the electrodes was 0.6 cm. The resulting mixture was stirred and electrolyzed at a constant current of 10 mA at ambient temperature for 15 min. with  $\text{O}_2$ -balloon. Then reaction mixture was concentrated in vacuum and the crude product was directly purified by column chromatography using ethyl acetate/petroleum ether (5%) as eluent to afford recovered starting material and product. The ratio of **3aa** and **3aa-*d*<sub>1</sub>** was determined by  $^1\text{H}$  NMR spectroscopy. Primary kinetic isotopic effect (KIE) was found be  $k_{\text{H}}/k_{\text{D}} \approx 0.84/0.16 \approx 5.3$ .  $^1\text{H}$  NMR spectroscopy of recovered starting material showed that the ratio of **1a**:**1a-*d*<sub>2</sub>** = 25:75.

**Fate of 9,10-dihydroacridine and N-protected 9,10-dihydroacridine in standard electrochemical conditions:**

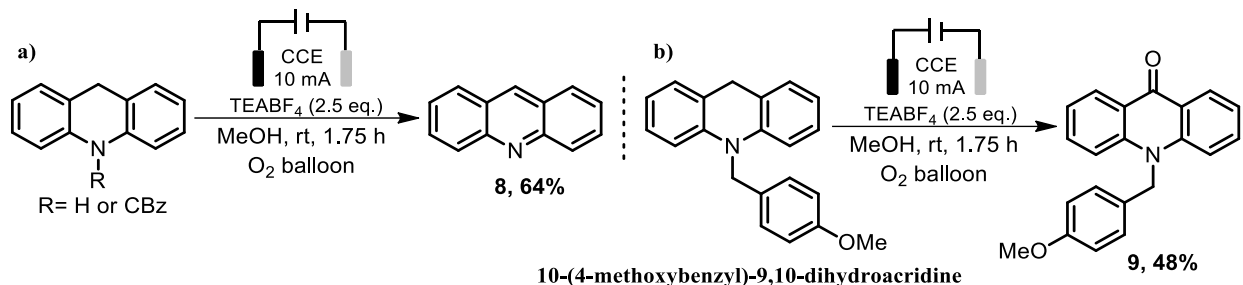

The above reactions **a** and **b** were performed in similar way. A 5 mL oven-dried electrosyn vial was charged with 0.2 mmol of starting materials, TEABF<sub>4</sub> (0.5 mmol, 2.5 equiv.) and MeOH (2.0 mL). The vial was equipped with graphite rod as anode and platinum plate as the cathode. The resulting mixture was stirred and electrolyzed at a constant current of 10 mA at ambient temperature for 1.75 h. with  $\text{O}_2$ -balloon. After completion of the reaction indicated by TLC the volatiles were evaporated in vacuum and the crude product was directly purified by column chromatography using ethyl acetate / petroleum ether (5%) to afford product **8** and **9**.



**Table S4: Comparison with non-electrochemical methods**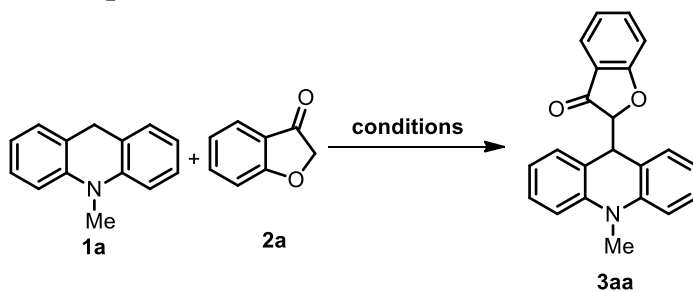

| Entry | Conditions                                                                                                          | Yield of 3aa |
|-------|---------------------------------------------------------------------------------------------------------------------|--------------|
| 1     | 1a (0.2 mmol, 1 equiv), 2a (0.26 mmol, 1.3 equiv), Eosin Y (10 mol%), MeOH (2 mL), blue LED (455 nm), rt, 12 h      | trace        |
| 2     | 1a (0.2 mmol, 1 equiv), 2a (0.26 mmol, 1.3 equiv), O <sub>2</sub> balloon, MeOH (2 mL), blue LED (455 nm), rt, 12 h | trace        |
| 3     | 1a (0.2 mmol, 1 equiv), 2a (0.26 mmol, 1.3 equiv), DDQ (2 equiv), MeOH (2 mL), rt, 24 h                             | 23%          |
| 4     | 1a (0.2 mmol, 1 equiv), 2a (0.26 mmol, 1.3 equiv), TBHP (2 equiv), MeOH (2 mL), rt, 24 h                            | 43%          |
| 5     | Optimized electrochemical condition                                                                                 | 84%          |

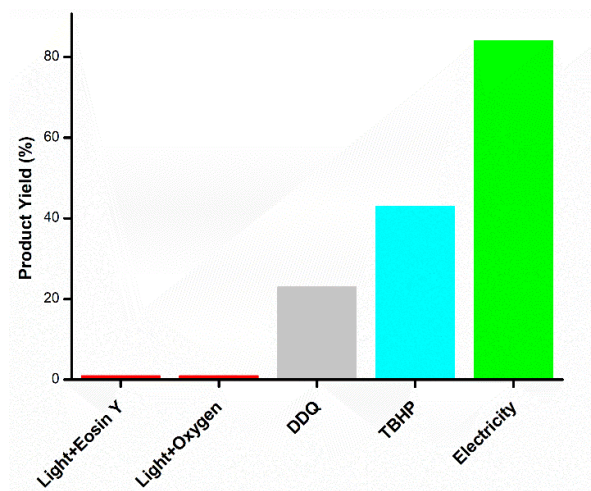**Figure S6.** Effect of common oxidants on the product yield.

## Fluorescence lifetime of compounds 3aa, 5ba, 3ae, 6af and 3db in Acetonitrile.

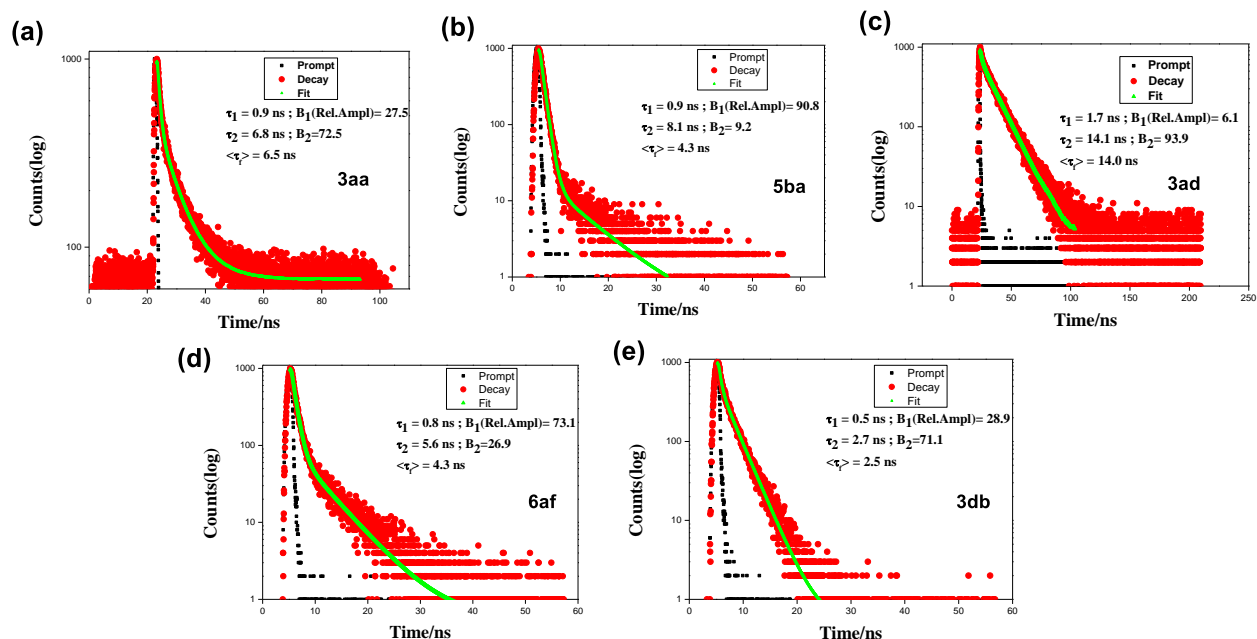

**Figure S7.** Fluorescence decay curves of compounds (a) 3aa, (b) 5ba, (c) 3ad, (d) 6af and (e) 3db in acetonitrile at room temperature. Green line denotes the curve of best fit by a biexponential function.

**Table S5.** Fluorescence lifetime of compounds 3aa, 5ba, 3ad, 6af and 3db in Acetonitrile.

| Compound | $\tau_1/\text{ns}$ | $\tau_2/\text{ns}$ | $\langle\tau_f/\text{ns}\rangle^a$ | $\chi^2$ |
|----------|--------------------|--------------------|------------------------------------|----------|
| 3aa      | 0.9                | 6.8                | 6.5                                | 1.11     |
| 5ba      | 0.9                | 8.1                | 4.3                                | 1.01     |
| 3ad      | 1.7                | 14.1               | 14.0                               | 1.17     |
| 6af      | 0.8                | 5.6                | 4.3                                | 0.96     |
| 3db      | 0.5                | 2.7                | 2.5                                | 0.92     |

<sup>a</sup>The area-weighted mean fluorescence lifetime was calculated as follows:  $\langle\tau_f\rangle = \frac{\sum(A_n \tau_n^2)}{\sum(A_n \tau_n)}$  where  $A_n$  is the coefficient of exponential function of the n-th component. <sup>[6]</sup>

**Table S6.** Absorption, emission and Relative quantum yield data of 9- Substituted Fluorescent Acridines (Acetonitrile)

| Entry | Compound Name | Absorption (nm) | Emission (nm) | Stokes shift (nm) | Relative Quantum Yield ( $\Phi_f$ ) |
|-------|---------------|-----------------|---------------|-------------------|-------------------------------------|
| 1     | 1a            | 284             | 382           | 98                | 0.22                                |
| 2     | 1b            | 292             | 410           | 118               | 0.09                                |
| 3     | 3aa           | 287             | 490           | 203               | 0.55                                |
| 4     | 5ba           | 293             | 411           | 118               | 0.46                                |
| 5     | 3ad           | 288             | 485           | 197               | 0.09                                |
| 6     | 6af           | 280             | 484           | 204               | 0.33                                |
| 7     | 1d            | 289             | 384           | 95                | 0.03                                |
| 8     | 3db           | 287             | 495           | 208               | 0.06                                |

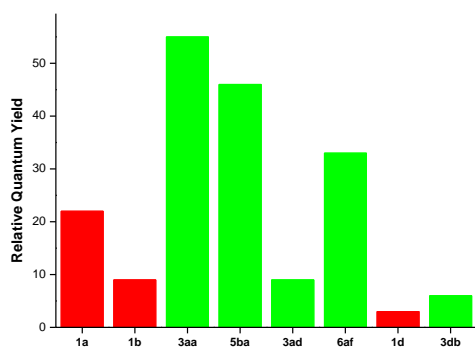

**Figure S8. Relative Quantum Yield Comparison**

**Fluorescence studies:**

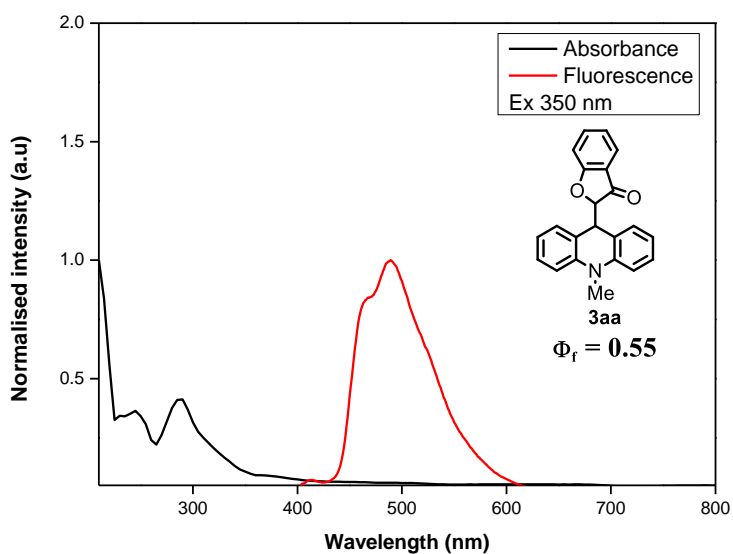

**Figure S9. Absorption (black, left) and fluorescence (red, right) spectra of compound 3aa (50  $\mu$ M) in Acetonitrile.**

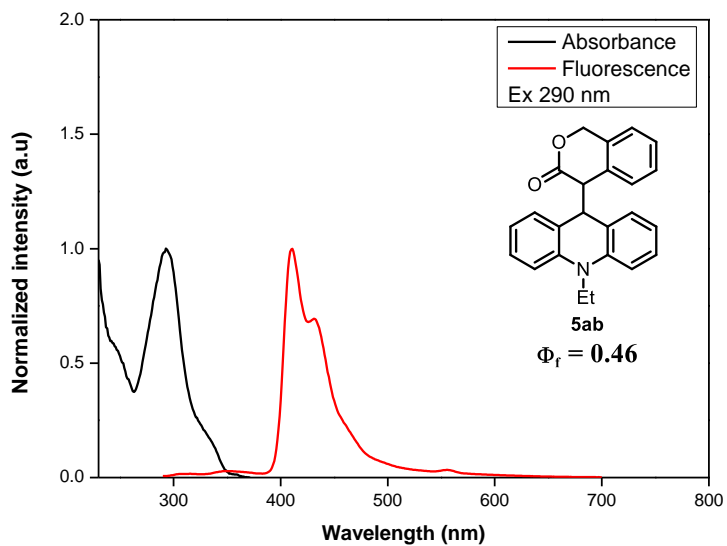

Figure S10. Absorption (black, left) and fluorescence (red, right) spectra of compound 5ba (50  $\mu$ M) in Acetonitrile.

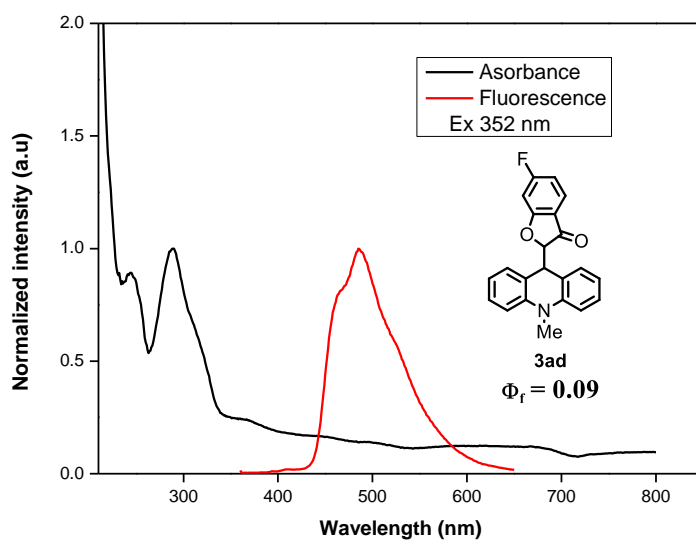

Figure S11. Absorption (black, left) and fluorescence (red, right) spectra of compound 3ad (50  $\mu$ M) in Acetonitrile.

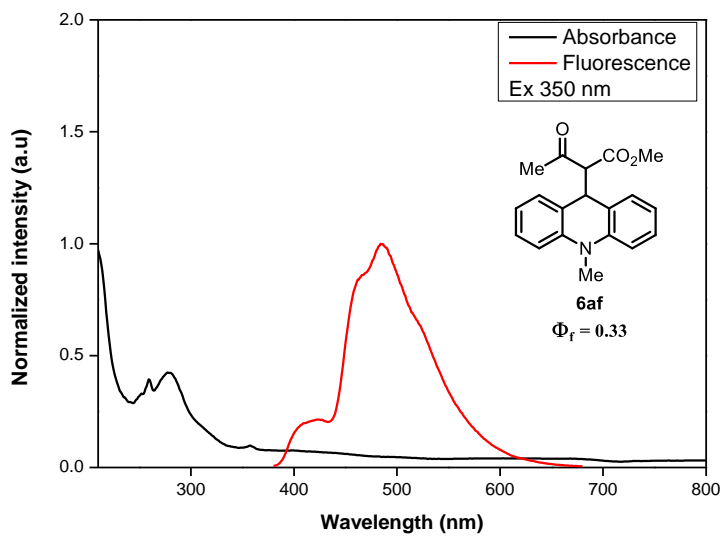

**Figure S12.** Absorption (black, left) and fluorescence (red, right) spectra of compound **6af** (50  $\mu\text{M}$ ) in Acetonitrile.

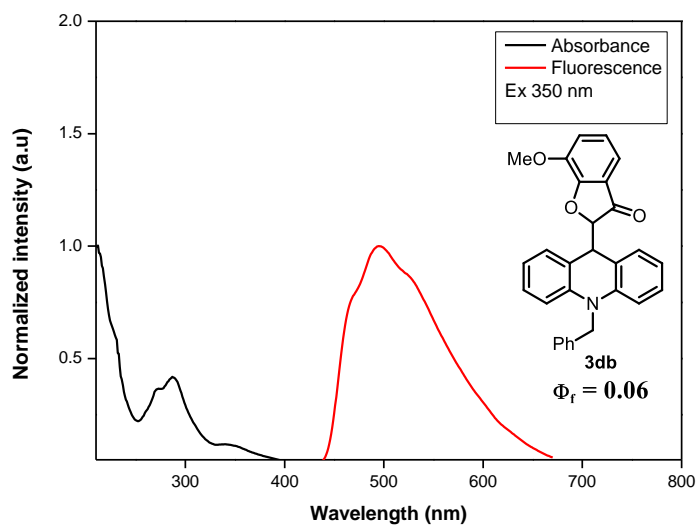

**Figure S13.** Absorption (black, left) and fluorescence (red, right) spectra of compound **3db** (50  $\mu\text{M}$ ) in Acetonitrile.

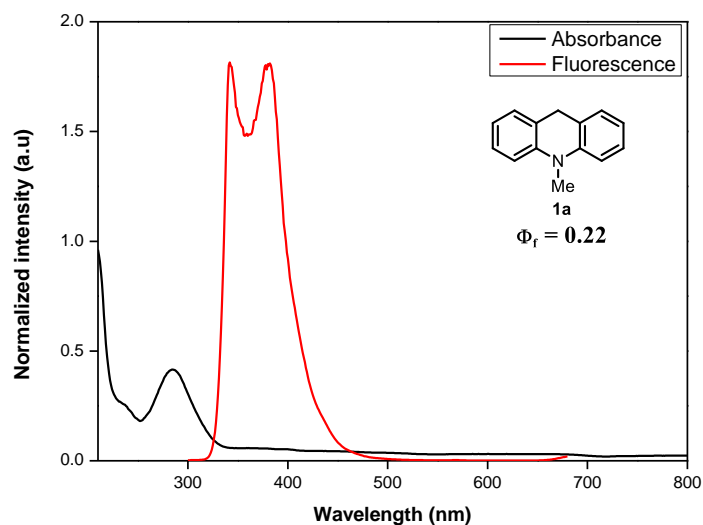

**Figure S14.** Absorption (black, left) and fluorescence (red, right) spectra of compound **1a** (50  $\mu\text{M}$ ) in Acetonitrile.

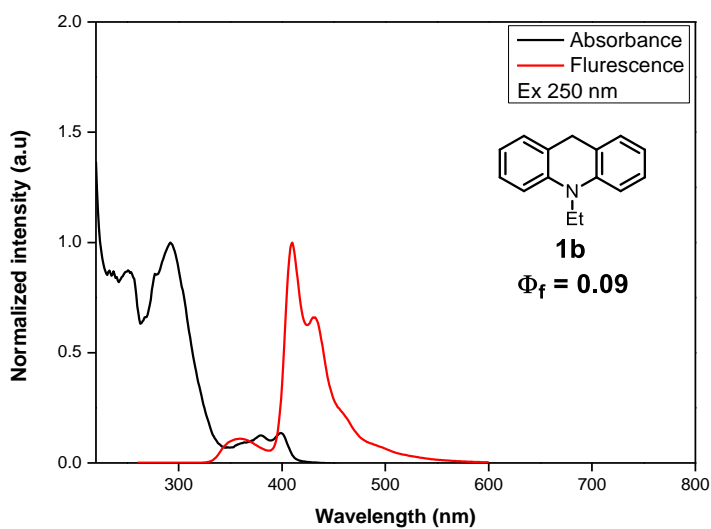

**Figure S15.** Absorption (black, left) and fluorescence (red, right) spectra of compound **1b** (50  $\mu\text{M}$ ) in Acetonitrile.

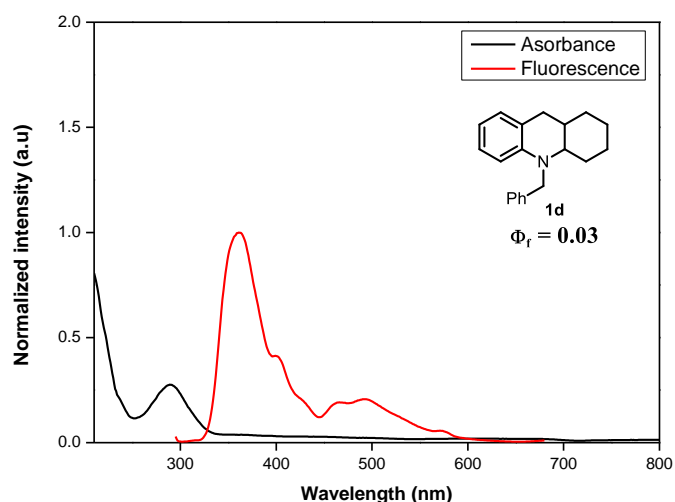

**Figure S16.** Absorption (black, left) and fluorescence (red, right) spectra of compound **1d** (50  $\mu$ M) in Acetonitrile.

**Table S7.** Theoretical Calculations:

The geometrical optimization was carried out at the B3LYP/def2-SVP level of theory implemented on Turbomole (TmoleX2023) in gas phase. Convergence at a local minimum structure in the ground state and excited state was confirmed.

| Energy level                 | 3aa                      |                           | 5ba                      |                           | 3ad                      |                           | 6af                      |                           | 3bd                      |                           |
|------------------------------|--------------------------|---------------------------|--------------------------|---------------------------|--------------------------|---------------------------|--------------------------|---------------------------|--------------------------|---------------------------|
|                              | Ground State Energy (ev) | Excited State Energy (ev) | Ground State Energy (ev) | Excited State Energy (ev) | Ground State Energy (ev) | Excited State Energy (ev) | Ground State Energy (ev) | Excited State Energy (ev) | Ground State Energy (ev) | Excited State Energy (ev) |
| LUMO+1                       | -0.2966                  | -0.4217                   | -0.5360                  | -0.6748                   | -0.5714                  | -0.6911                   | -0.3945                  | -0.3428                   | -0.4027                  | -0.3646                   |
| LUMO                         | -1.8063                  | -2.2729                   | -0.7969                  | -1.8804                   | -1.8332                  | -2.2885                   | -0.5199                  | -1.8699                   | -1.6081                  | -2.0999                   |
| HOMO                         | -5.3013                  | -4.9660                   | -5.279                   | -4.4912                   | -5.3701                  | -5.0695                   | -5.2380                  | -4.7342                   | -5.3349                  | -4.99522                  |
| HOMO-1                       | -6.340                   | -6.4137                   | -6.604                   | -6.0354                   | -6.6422                  | -6.6205                   | -6.4028                  | -6.0926                   | -6.0382                  | -6.2749                   |
| E <sub>gap</sub> (HOMO-LUMO) | <b>3.495</b>             | <b>2.6931</b>             | <b>4.4815</b>            | <b>2.611</b>              | <b>3.5369</b>            | <b>2.7809</b>             | <b>4.71807</b>           | <b>2.864</b>              | <b>3.72686</b>           | <b>2.89526</b>            |

**Frontier molecular orbital of acridanes both in ground state and in excited state (HOMO and LUMO) by DFT (Turbomole):**

|      | Ground state                                                                        | Energy (ev) | Excited State                                                                        | Energy (ev) |
|------|-------------------------------------------------------------------------------------|-------------|--------------------------------------------------------------------------------------|-------------|
| 3aa  |                                                                                     |             |                                                                                      |             |
| LUMO | 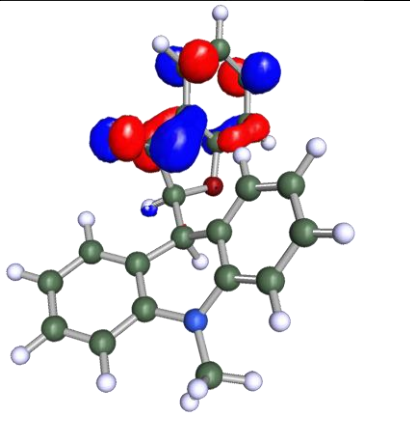   | -1.8063     |    | -2.272      |
| HOMO |   | -5.3013     |   | -4.966      |
| 3ad  |                                                                                     |             |                                                                                      |             |
| LUMO |  | -1.8332     |  | -2.2884     |



|      |                                                                                     |          |                                                                                       |         |
|------|-------------------------------------------------------------------------------------|----------|---------------------------------------------------------------------------------------|---------|
| HOMO | 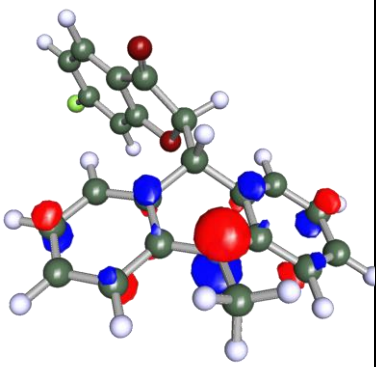   | -5.37015 |     | -5.0695 |
| 3db  |                                                                                     |          |                                                                                       |         |
| LUMO |    | -1.6081  |     | -2.0999 |
| HOMO |  | -5.336   |   | -4.9952 |
| 5ba  |                                                                                     |          |                                                                                       |         |
| LUMO |  | -0.7969  |  | -1.8804 |

|      |                                                                                    |         |                                                                                     |         |
|------|------------------------------------------------------------------------------------|---------|-------------------------------------------------------------------------------------|---------|
| HOMO | 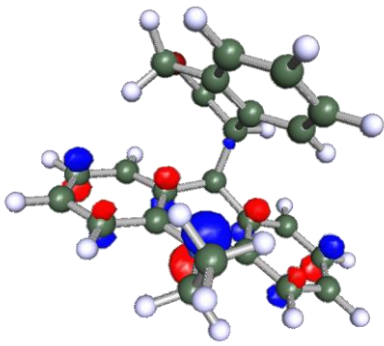  | -5.2784 |  | -4.4912 |
| 6af  |                                                                                    |         |                                                                                     |         |
| LUMO |   | -0.5199 |   | -1.8699 |
| HOMO |  | -5.2380 |  | -4.7342 |

**Cartesian coordinates and Cartesian gradients and Energy for the compounds 3aa, 5ba, 3ad, 6af and 3bd**

The geometrical optimization was carried out at the B3LYP/def2-SVP level of theory implemented on Turbomole (TmoleX2023) in gas phase. Convergence at a local minimum structure in the ground state and excited state was confirmed.

For the compound **3aa**, ground state: Cartesian coordinates and Cartesian gradients and Energy:

**No Imaginary frequency was observed.**

\*\*\*\*\*

| ATOM | CARTESIAN COORDINATES |                   |                   |
|------|-----------------------|-------------------|-------------------|
| 1 c  | -1.60378069257824     | -5.34581088805835 | 0.37905920980765  |
| 2 c  | -2.19899346854222     | -2.83151624166591 | 0.91899614740490  |
| 3 c  | -4.76543002741024     | -2.13707061076930 | 1.22074959380156  |
| 4 c  | -6.65325437372587     | -4.00110187669224 | 1.09938410647897  |
| 5 c  | -6.00455267666260     | -6.52069613327820 | 0.64529166985805  |
| 6 c  | -3.48836465235207     | -7.19780930109847 | 0.25106654390711  |
| 7 n  | -5.32792632054956     | 0.44334849064124  | 1.58142829267982  |
| 8 c  | -3.80041599286873     | 2.21190079235408  | 0.29653543949494  |
| 9 c  | -1.20058517584691     | 1.64844093964885  | -0.00423484328659 |
| 10 c | -0.30613156674216     | -0.71120311243540 | 1.37519091562327  |
| 11 c | 2.47130958667892      | -1.48013335727657 | 1.11652652330752  |
| 12 o | 4.06836726021131      | 0.33811536105652  | 2.38643968597362  |
| 13 c | 6.14171685054488      | 0.75373713749526  | 0.95199533722826  |
| 14 c | 6.08315432355456      | -0.48434019598647 | -1.39058724185523 |
| 15 c | 3.68736449649918      | -1.89125673899706 | -1.51637800657958 |
| 16 o | 2.84826692373192      | -3.19354205306531 | -3.20094636300607 |
| 17 c | 8.06862091588729      | -0.22441424762969 | -3.12092771465343 |

|      |                   |                   |                   |
|------|-------------------|-------------------|-------------------|
| 18 c | 10.11993063662903 | 1.28462690135293  | -2.44740238167056 |
| 19 c | 10.15769178330246 | 2.51390249884296  | -0.08272792802334 |
| 20 c | 8.18295365378623  | 2.27815542807574  | 1.65417231564694  |
| 21 c | 0.32283188253056  | 3.32320746343127  | -1.35859927715048 |
| 22 c | -0.65996608516485 | 5.56111681984329  | -2.37086973504030 |
| 23 c | -3.20890356492153 | 6.13194316373441  | -2.02397276321284 |
| 24 c | -4.78219012598007 | 4.46361326241188  | -0.71384615082824 |
| 25 c | -7.84782705314570 | 1.16899361197491  | 2.36975851302887  |
| 26 h | 0.35036726671392  | -5.88885529203412 | 0.01683424737535  |
| 27 h | -8.63943081150243 | -3.49535118862378 | 1.31040524935777  |
| 28 h | -7.49473958062508 | -7.94935736654822 | 0.55670483509447  |
| 29 h | -2.97986382855333 | -9.15650504306158 | -0.15846996165657 |
| 30 h | -0.49156788447685 | -0.24668475403968 | 3.41491039059102  |
| 31 h | 2.71404063752392  | -3.28223461483656 | 2.14499846732804  |
| 32 h | 7.97940650708131  | -1.19702056290639 | -4.94090936559865 |
| 33 h | 11.70866769239859 | 1.52217266209770  | -3.74397750035387 |
| 34 h | 11.78345886337061 | 3.69059138669661  | 0.41093101747151  |
| 35 h | 8.20905692786204  | 3.23750108843004  | 3.47998356399544  |
| 36 h | 2.32607158925893  | 2.92334870707759  | -1.61646362638260 |
| 37 h | 0.57486206840257  | 6.85094950204140  | -3.40733947993508 |
| 38 h | -4.00281195815256 | 7.87412199486996  | -2.80091855390891 |
| 39 h | -6.78507458955440 | 4.90770330357673  | -0.52479910730126 |
| 40 h | -8.50431846472718 | -0.11861474377726 | 3.86151280803399  |
| 41 h | -7.79981198017448 | 3.08741902520299  | 3.16393971138601  |
| 42 h | -9.25219899171090 | 1.13860878192388  | 0.81655541556806  |

\*\*\*\*\*

| ATOM | CARTESIAN GRADIENTS |                   |                   |
|------|---------------------|-------------------|-------------------|
| 1 c  | 0.00002970249289    | 0.00008765915247  | 0.00013166614721  |
| 2 c  | -0.00000242379511   | 0.00000138287909  | -0.00004964437489 |
| 3 c  | -0.00004767157195   | 0.00003569438316  | 0.00014993225203  |
| 4 c  | 0.00000679472702    | -0.00001098558109 | -0.00005665363699 |
| 5 c  | -0.00001500987834   | -0.00000681040153 | 0.00000139031438  |
| 6 c  | 0.00000754958523    | -0.00001714933710 | -0.00013859805957 |
| 7 n  | 0.00005404809174    | -0.00007163540134 | -0.00001357865462 |
| 8 c  | -0.00007639689045   | 0.00004483339417  | 0.00005041087508  |
| 9 c  | 0.00000143824153    | -0.00006741908218 | -0.00002814330462 |
| 10 c | -0.00000493377014   | -0.00001493746279 | 0.00007869476780  |
| 11 c | 0.00002655776351    | -0.00003958230120 | 0.00003591190088  |
| 12 o | 0.00006745262284    | -0.00008098640747 | 0.00002548232196  |
| 13 c | -0.00014646228341   | 0.00020594420404  | -0.00011630715256 |
| 14 c | -0.00003204463487   | 0.00005704369421  | -0.00001186279610 |
| 15 c | 0.00004395249284    | -0.00004472383551 | 0.00001362980508  |
| 16 o | -0.00002733224213   | -0.00000395959008 | -0.00002244779902 |
| 17 c | 0.00002877023522    | -0.00011431978225 | 0.00005469821913  |
| 18 c | -0.00000551529514   | 0.00001406889570  | -0.00001250396683 |
| 19 c | 0.00003830389146    | -0.00005009022775 | 0.00003473335263  |
| 20 c | 0.00001648474498    | -0.00009503354199 | 0.00005607176269  |
| 21 c | 0.00001204403449    | 0.00001339035519  | -0.00001991159094 |
| 22 c | -0.00001185993360   | 0.00000262663078  | -0.00001378058182 |
| 23 c | 0.00000191333457    | 0.00001810126856  | -0.00001016634771 |
| 24 c | 0.00003695607035    | 0.00004240333600  | -0.00003408632655 |
| 25 c | 0.00000294566224    | 0.00000343249284  | 0.00003690443501  |

|      |                   |                   |                   |
|------|-------------------|-------------------|-------------------|
| 26 h | -0.00001184426338 | -0.00002705134508 | -0.00008911789021 |
| 27 h | -0.00001191285119 | 0.00001243961526  | -0.00009820982491 |
| 28 h | -0.00000170796259 | -0.00002719759433 | 0.00010888548277  |
| 29 h | 0.00000623581325  | -0.00001373547071 | 0.00002127391738  |
| 30 h | -0.00002274676094 | -0.00000626796379 | 0.00004076710975  |
| 31 h | -0.00001527343238 | 0.00001676807968  | 0.00001647842626  |
| 32 h | -0.00001844610935 | 0.00002831297105  | -0.00003722775134 |
| 33 h | 0.00001201859116  | -0.00000894564650 | -0.00001679157024 |
| 34 h | 0.00001945395553  | -0.00000799030351 | 0.00001734111285  |
| 35 h | -0.00003525501549 | 0.00006819339514  | -0.00001784877595 |
| 36 h | -0.00004666020107 | -0.00000858316577 | -0.00005680515082 |
| 37 h | 0.00002120617630  | 0.00003086615621  | 0.00003819496430  |
| 38 h | -0.00000223566346 | 0.00001564886274  | -0.00000495654929 |
| 39 h | -0.00000384689444 | -0.00001405646734 | -0.00003356446774 |
| 40 h | -0.00000183670116 | 0.00000347346221  | 0.00000509475836  |
| 41 h | 0.00000483772821  | 0.00000084463288  | 0.00000804511890  |
| 42 h | -0.00000974709811 | -0.00000033267653 | -0.00000367074043 |

\*\*\*\*\*

norm of actual CARTESIAN gradient: 5.54849E-04

norm of actual INTERNAL gradient: 9.94736E-04

ENERGY = -1052.3883116500 a.u.; # of cycle = 11

Approximate Hessian read from \$hessapprox data section

Hessian updated according to BFGS formula

Number of zero Hessian eigenvalues: 0

```
-----  
| total energy   = -1052.38831294818 |  
-----  
  
: kinetic energy = 1041.66449400756 :  
: potential energy = -2094.05280695574 :  
: virial theorem  =  1.98981001707 :  
: wavefunction norm =  0.99999999990 :  
.....
```

#### HOMO-LUMO Separation

HOMO : -0.19481786 H = -5.30127 eV

LUMO : -0.06638186 H = -1.80634 eV

HOMO-LUMO gap: 0.12843600 H = +3.49492 eV

For the compound **3aa**, excited state: Cartesian coordinates and Cartesian gradients and Energy

\*\*\*\*\*

| ATOM | CARTESIAN COORDINATES |                   |                  |
|------|-----------------------|-------------------|------------------|
| 1 c  | -1.51831762129636     | -5.35964637378737 | 0.59583467276804 |
| 2 c  | -2.15349640586273     | -2.83078292016033 | 0.97759231272851 |
| 3 c  | -4.76688443322855     | -2.18029081078678 | 1.08762287253674 |
| 4 c  | -6.65504342522592     | -4.08009844237381 | 1.00402344918141 |
| 5 c  | -5.95688194809080     | -6.58630035686239 | 0.70667924839440 |
| 6 c  | -3.39202636144413     | -7.21966498700240 | 0.46256044069427 |

|      |                   |                   |                   |
|------|-------------------|-------------------|-------------------|
| 7 n  | -5.43507832324533 | 0.36655887904075  | 1.13756351724183  |
| 8 c  | -3.76524659775634 | 2.21970406790919  | 0.24663854539310  |
| 9 c  | -1.12572584725772 | 1.68533651749527  | 0.20055015797397  |
| 10 c | -0.26180935568331 | -0.73811305841844 | 1.46278248937113  |
| 11 c | 2.53936797666235  | -1.50325669814311 | 1.29201216932060  |
| 12 o | 4.06236677231051  | 0.44094270117491  | 2.38176593907529  |
| 13 c | 6.14060678591381  | 0.80690435349315  | 0.81589362391220  |
| 14 c | 5.94224323913396  | -0.64911997096323 | -1.44113838206038 |
| 15 c | 3.67381399187815  | -2.08049613505248 | -1.36047818048458 |
| 16 o | 2.67276992662641  | -3.62611458018556 | -2.85424202279864 |
| 17 c | 7.91623201170837  | -0.41204900843918 | -3.26952037015086 |
| 18 c | 9.93582542993079  | 1.20606864068903  | -2.75557769109384 |
| 19 c | 10.07778123235998 | 2.61207126866895  | -0.50849559104466 |
| 20 c | 8.11232712196859  | 2.40929405492130  | 1.33601580758252  |
| 21 c | 0.49085668867688  | 3.51762331670432  | -0.79371015051280 |
| 22 c | -0.45862763735172 | 5.80093354422523  | -1.72592590685516 |
| 23 c | -3.05451319425998 | 6.32586244191226  | -1.64997040666703 |
| 24 c | -4.70989178619483 | 4.55173843180945  | -0.66024582813451 |
| 25 c | -8.01791420710370 | 1.08250975790709  | 1.81091636864340  |
| 26 h | 0.44845993330770  | -5.86095371777714 | 0.28338836996860  |
| 27 h | -8.65287686763483 | -3.59138905591527 | 1.07388044509825  |
| 28 h | -7.40899516797994 | -8.04903490857517 | 0.60412650757728  |
| 29 h | -2.84475241896336 | -9.18437278431039 | 0.14651687436419  |
| 30 h | -0.53832452698557 | -0.30126758297546 | 3.50686504593796  |
| 31 h | 2.74682706720419  | -3.20276058737263 | 2.50264372230231  |
| 32 h | 7.82541552645827  | -1.50243751117330 | -5.01840390280288 |



|      |                   |                   |                   |
|------|-------------------|-------------------|-------------------|
| 33 h | 11.46205187129043 | 1.38082876759470  | -4.14162814438519 |
| 34 h | 11.68682423415016 | 3.85392527034517  | -0.15419098798832 |
| 35 h | 8.16775169991962  | 3.47362709855007  | 3.10358802563077  |
| 36 h | 2.51179513679156  | 3.17356891414076  | -0.85262311896622 |
| 37 h | 0.85096296601597  | 7.18463216508554  | -2.51861545792084 |
| 38 h | -3.78457988496690 | 8.11016712536790  | -2.38618226173973 |
| 39 h | -6.72984823046023 | 4.94590687437356  | -0.66282247428846 |
| 40 h | -8.74174676264043 | -0.22573591705808 | 3.24272546785838  |
| 41 h | -8.01097679582115 | 2.98863348174372  | 2.61717008967647  |
| 42 h | -9.28072181285369 | 1.04704773417984  | 0.15441471466202  |

\*\*\*\*\*

| ATOM | CARTESIAN GRADIENTS |                   |                   |
|------|---------------------|-------------------|-------------------|
| 1 c  | -0.00000791031313   | -0.00001380607122 | 0.00000038698132  |
| 2 c  | -0.00000026512476   | 0.00000046314386  | 0.00000119788551  |
| 3 c  | -0.00000550314892   | 0.00000946527246  | 0.00000323406855  |
| 4 c  | -0.00000557915465   | 0.00000155659360  | 0.00000371163269  |
| 5 c  | 0.00000145796369    | -0.00000241471758 | 0.00000971066836  |
| 6 c  | -0.00001817594788   | 0.00000342247513  | 0.00000617341806  |
| 7 n  | -0.00000363038352   | -0.00000780780722 | 0.00000039333680  |
| 8 c  | -0.00000037834581   | 0.00000690589077  | -0.00000030562044 |
| 9 c  | -0.00000653842603   | 0.00000311113836  | -0.00000100468323 |
| 10 c | -0.00000752663264   | 0.00000034488706  | 0.00000477704731  |
| 11 c | 0.00000465833786    | -0.00000497129984 | 0.00000175183155  |
| 12 o | -0.00000609539925   | 0.00000171592465  | -0.00001109046381 |
| 13 c | 0.00000175028540    | 0.00000220621512  | -0.00000676247167 |
| 14 c | -0.00000421841737   | -0.00001141607221 | -0.00000178567804 |

|      |                   |                   |                   |
|------|-------------------|-------------------|-------------------|
| 15 c | -0.00000180767570 | 0.00001743549399  | 0.00001704175327  |
| 16 o | -0.00000740558324 | -0.00001394616710 | -0.00001102350489 |
| 17 c | 0.00000209383441  | -0.00000463665772 | -0.00000377959142 |
| 18 c | -0.00000618674209 | -0.00000552470868 | -0.00000590233555 |
| 19 c | -0.00000609305213 | 0.00000231541056  | -0.00001016401069 |
| 20 c | -0.00000732725604 | -0.00000397042367 | -0.00000337465422 |
| 21 c | -0.00000146972712 | -0.00000405184890 | 0.00000235192201  |
| 22 c | -0.00000633349029 | 0.00000448413945  | 0.00000212454717  |
| 23 c | 0.00000406809324  | 0.00000201714919  | 0.00000088833343  |
| 24 c | -0.00000127901896 | -0.00000251833800 | 0.00000343591887  |
| 25 c | -0.00000445453346 | 0.00000443679006  | 0.00000797810872  |
| 26 h | 0.00000101874555  | 0.00001188217560  | 0.00000476400099  |
| 27 h | -0.00000228849253 | 0.00000054136529  | 0.00000225363690  |
| 28 h | -0.00000671477976 | 0.00000349630090  | 0.00000325143949  |
| 29 h | -0.00000495374452 | -0.00000004458320 | 0.00000738519440  |
| 30 h | 0.00000605550831  | 0.00000057195220  | -0.00000141741405 |
| 31 h | -0.00000556871427 | -0.00000530565482 | -0.00000480166797 |
| 32 h | -0.00001198613388 | -0.00000317153369 | -0.00000509336954 |
| 33 h | -0.00000149738468 | -0.00000866188610 | -0.00000410335102 |
| 34 h | -0.00000433046925 | -0.00000132638386 | -0.00001172714525 |
| 35 h | 0.00000175437588  | -0.00000354155560 | -0.00000716549275 |
| 36 h | -0.00000336819962 | -0.00000138430044 | -0.00000130556158 |
| 37 h | -0.00000152476298 | 0.00000082960412  | 0.00000354237928  |
| 38 h | -0.00000209969713 | 0.00000022876237  | -0.00000020803392 |
| 39 h | -0.00000124051294 | 0.00000523499466  | 0.00000867583719  |
| 40 h | -0.00000078615064 | 0.00000525331724  | 0.00000466379076  |

41 h 0.00000115644063 0.00000362778152 0.00000597509922  
42 h -0.00000068318667 0.00000412755754 0.00000574190307

\*\*\*\*\*

norm of actual CARTESIAN gradient: 6.62762E-05

norm of actual INTERNAL gradient: 1.35457E-04

ENERGY = -1052.2940897822 a.u.; # of cycle = 22

Approximate Hessian read from \$hessapprox data section

Hessian updated according to BFGS formula

Number of zero Hessian eigenvalues: 0

-----  
| total energy = -1052.37399251638 |

-----  
: kinetic energy = 1041.46833992165 :

: potential energy = -2093.84233243803 :

: virial theorem = 1.98963709416 :

: wavefunction norm = 0.99999999990 :

HOMO-LUMO Separation

HOMO : -0.18249804 H = -4.96603 eV

LUMO : -0.08352970 H = -2.27296 eV

HOMO-LUMO gap: 0.09896834 H = +2.69307 eV

**SUMMARY OF EXCITATION ENERGIES AND DIPOLE OSCILLATOR STRENGTHS (velocity/length):**

1- 5 singlet a excitation

| Exc. | energy (Eh) | energy (eV) | energy (cm-1) | energy (nm) | Osc.(vel) | Osc.(len) |
|------|-------------|-------------|---------------|-------------|-----------|-----------|
| 1 a  | 0.079903    | 2.17427     | 17536.640     | 570.235     | 0.00282   | 0.00315   |
| 2 a  | 0.114850    | 3.12522     | 25206.630     | 396.721     | 0.00087   | 0.00069   |
| 3 a  | 0.135543    | 3.68831     | 29748.241     | 336.154     | 0.00426   | 0.00432   |
| 4 a  | 0.137963    | 3.75417     | 30279.411     | 330.257     | 0.01117   | 0.01050   |
| 5 a  | 0.144566    | 3.93385     | 31728.664     | 315.172     | 0.00564   | 0.00659   |

For the compound **5ba**, ground state: Cartesian coordinates and Cartesian gradients and Energy

: *No Imaginary frequency was observed.*

\*\*\*\*\*#####

| ATOM | CARTESIAN COORDINATES |                   |                   |
|------|-----------------------|-------------------|-------------------|
| 1 c  | -2.75200422403436     | 5.74779553821674  | 0.68851386578108  |
| 2 c  | -2.08557815271751     | 3.20834061213644  | 1.01897877863347  |
| 3 c  | -3.55196759332194     | 1.28763514485986  | -0.13491541941671 |
| 4 c  | -5.54040757720596     | 2.04647604372689  | -1.75309284358101 |
| 5 c  | -6.13273907239671     | 4.59141844685664  | -2.09510230228996 |
| 6 c  | -4.77116854114924     | 6.47377044164561  | -0.84256658286884 |
| 7 n  | -3.03995883933271     | -1.27482252114484 | 0.36562360412616  |
| 8 c  | -1.34405630192924     | -1.96275835842943 | 2.29573814395926  |
| 9 c  | 0.14839283361707      | -0.09827463170768 | 3.51127730094258  |

|      |                   |                   |                   |
|------|-------------------|-------------------|-------------------|
| 10 c | 0.28702966620361  | 2.54559571368055  | 2.45119483853227  |
| 11 c | 2.73212041521926  | 3.03121544656101  | 0.75135648403068  |
| 12 c | 5.08167123600776  | 2.80843151925168  | 2.41816046298862  |
| 13 o | 6.58221915890113  | 0.76690284990906  | 2.14942527300341  |
| 14 c | 5.89444939325037  | -1.34496752763813 | 0.60107141147062  |
| 15 c | 4.47867271153990  | -0.60858129343290 | -1.75310990294175 |
| 16 c | 2.91972685810936  | 1.53535369602404  | -1.67494714507343 |
| 17 c | 1.64723542078498  | 2.28464897349747  | -3.88010509446318 |
| 18 c | 1.87149562868371  | 0.88271900196779  | -6.10465430639890 |
| 19 c | 3.39906940710144  | -1.27524494276481 | -6.16074338628885 |
| 20 c | 4.71469548221264  | -2.00246165982711 | -3.99199246385103 |
| 21 o | 5.61192100471848  | 4.39538335123850  | 3.96215942159052  |
| 22 c | 1.58208905501784  | -0.74783552335875 | 5.64103501530847  |
| 23 c | 1.72195052370352  | -3.23031694613513 | 6.52000150344817  |
| 24 c | 0.40393147976746  | -5.10340380442921 | 5.20985354829948  |
| 25 c | -1.10699297762198 | -4.48910181287056 | 3.13832396054120  |
| 26 c | -4.51794235052981 | -3.23603120031614 | -0.90422829022781 |
| 27 c | -3.28563985332742 | -4.24815642784769 | -3.31523785692805 |
| 28 h | -1.61964245111519 | 7.19108820483073  | 1.64477042377626  |
| 29 h | -6.65651643673850 | 0.65750289287446  | -2.77906965817733 |
| 30 h | -7.69193267520701 | 5.09392031356376  | -3.35444451723898 |
| 31 h | -5.25253015696062 | 8.46743540255909  | -1.07683283745274 |
| 32 h | 0.52629410222114  | 3.88935512388662  | 4.02235552073444  |
| 33 h | 2.62832464116157  | 5.05492805722248  | 0.28548816227520  |
| 34 h | 7.68621150991072  | -2.28496333672539 | 0.12371715513975  |
| 35 h | 4.77835596802590  | -2.66834354589223 | 1.76632935182833  |
| 36 h | 0.47891245542164  | 3.98675896753640  | -3.85081211227809 |
| 37 h | 0.87055911650584  | 1.49026208950024  | -7.80670381621609 |

|      |                   |                   |                   |
|------|-------------------|-------------------|-------------------|
| 38 h | 3.59803859284115  | -2.36519731562717 | -7.90435401908931 |
| 39 h | 5.95966671120237  | -3.65309159492438 | -4.04364698448829 |
| 40 h | 2.64521316720403  | 0.74071877392022  | 6.60189666926143  |
| 41 h | 2.86496751018162  | -3.69391152818064 | 8.17494740946636  |
| 42 h | 0.52150094884164  | -7.07719041066905 | 5.81018926339329  |
| 43 h | -2.10708787220513 | -6.01753775887806 | 2.19386136637695  |
| 44 h | -4.86534070618836 | -4.78018651271198 | 0.43549126583608  |
| 45 h | -6.40595067270353 | -2.48661954619225 | -1.31786898234355 |
| 46 h | -1.42451739219501 | -5.08776100578857 | -2.91285322718597 |
| 47 h | -4.48606573456154 | -5.71252421316116 | -4.18506830969824 |
| 48 h | -2.99667541690789 | -2.72837318681373 | -4.70664647381471 |

\*\*\*\*\*

#### ATOM

#### CARTESIAN GRADIENTS

|      |                   |                   |                   |
|------|-------------------|-------------------|-------------------|
| 1 c  | 0.00001289749683  | -0.00000022915741 | -0.00002761168419 |
| 2 c  | 0.00001751047699  | 0.00002381070766  | -0.00000736204487 |
| 3 c  | 0.00001763941617  | 0.00000217061524  | 0.00000478472290  |
| 4 c  | 0.00000959062016  | -0.00001064019832 | -0.00001817570069 |
| 5 c  | -0.00001121719188 | -0.00000419714749 | 0.00001970831527  |
| 6 c  | -0.00000744425322 | 0.00000410447341  | 0.00000293976165  |
| 7 n  | -0.00001232224875 | 0.00000113951995  | 0.00001839530986  |
| 8 c  | 0.00000441279111  | 0.00000683125395  | -0.00000375345544 |
| 9 c  | -0.00000922654640 | -0.00000495450593 | -0.00002996085060 |
| 10 c | 0.00000699046328  | -0.00005368225831 | 0.00003537907519  |
| 11 c | -0.00000425094162 | 0.00000118953938  | -0.00002030397936 |
| 12 c | 0.00001859754059  | 0.00006582470673  | -0.00007424793316 |
| 13 o | -0.00003990440095 | -0.00004808138809 | 0.00004689917000  |
| 14 c | 0.00003150254266  | -0.00001222963179 | -0.00002244048935 |
| 15 c | -0.00001032580717 | 0.00000832591027  | 0.00000532327631  |

|      |                   |                   |                   |
|------|-------------------|-------------------|-------------------|
| 16 c | 0.00003369848375  | -0.00000196162699 | 0.00000377574640  |
| 17 c | -0.00000866830015 | 0.00000568450177  | -0.00000792432578 |
| 18 c | -0.00000507022801 | 0.00001028179701  | 0.00000214931145  |
| 19 c | 0.00000359403604  | -0.00001727294483 | 0.00000657658202  |
| 20 c | -0.00000798324398 | -0.00001862899564 | -0.00000627935664 |
| 21 o | -0.00000129853754 | -0.00003123655557 | -0.00000780547046 |
| 22 c | -0.00000618354486 | 0.00000260043698  | -0.00000168995352 |
| 23 c | 0.00000510663175  | 0.00000433913305  | -0.00000156703559 |
| 24 c | -0.00000446250685 | -0.00000223247938 | 0.00000568940663  |
| 25 c | -0.00000333661122 | 0.00000374542581  | -0.00000725221734 |
| 26 c | 0.00002323398390  | 0.00000332063266  | -0.00001376651738 |
| 27 c | -0.00001478748226 | 0.00001869632409  | 0.00001596387204  |
| 28 h | -0.00000704712449 | 0.00000125197562  | 0.00000981542328  |
| 29 h | -0.00000292356990 | -0.00001208161677 | 0.00000902029366  |
| 30 h | 0.00000081702080  | -0.00000136379221 | -0.00000354810852 |
| 31 h | 0.00000855950646  | 0.00000346626214  | -0.00001325459441 |
| 32 h | 0.00000877134976  | 0.00000231837721  | -0.00001394160539 |
| 33 h | -0.00000965887322 | 0.00001141225885  | -0.00000366579377 |
| 34 h | -0.00000257821016 | -0.00000347661759 | -0.00001174318509 |
| 35 h | 0.00000217432139  | -0.00000294957567 | -0.00000472898416 |
| 36 h | -0.00000612975250 | -0.00000555297337 | 0.00000340949126  |
| 37 h | -0.00000348661423 | -0.00000486535011 | -0.00000203758195 |
| 38 h | -0.00000404658090 | -0.00000385504806 | -0.00000388064897 |
| 39 h | 0.00001119960991  | 0.00000002384513  | -0.00001168395391 |
| 40 h | 0.00000783294389  | 0.00000007714019  | -0.00000367420024 |
| 41 h | 0.00000105931903  | 0.00000362646941  | 0.00000026133546  |
| 42 h | 0.00000449027027  | -0.00000173032627 | -0.00000634417822 |
| 43 h | -0.00000883994536 | 0.00000169603777  | 0.00000172935895  |

|      |                   |                   |                   |
|------|-------------------|-------------------|-------------------|
| 44 h | -0.00000765471599 | 0.00000020599702  | 0.00000186038369  |
| 45 h | -0.00001276973084 | 0.00000486789078  | 0.00001338895687  |
| 46 h | -0.00000166352027 | -0.00000016767199 | -0.00000452702380 |
| 47 h | -0.00000469301819 | -0.00000249369376 | -0.00000262886195 |
| 48 h | -0.00000119564675 | -0.00001068859998 | -0.00000820240225 |

\*\*\*\*\*

norm of actual CARTESIAN gradient: 1.88358E-04

norm of actual INTERNAL gradient: 2.90630E-04

ENERGY = -1130.9163698790 a.u.; # of cycle = 14

Approximate Hessian read from \$hessapprox data section

Hessian updated according to BFGS formula

Number of zero Hessian eigenvalues: 0

```
| total energy    = -1130.91637019225 |
-----
: kinetic energy  = 1119.13019024968 :
: potential energy = -2250.04656044193 :
: virial theorem  = 1.98957820379 :
: wavefunction norm = 1.00000000000 :
.....
```

HOMO-LUMO Separation

HOMO : -0.19397948 H = -5.27845 eV

LUMO : -0.02928582 H = -0.79691 eV

HOMO-LUMO gap: 0.16469367 H = +4.48155 eV



\*\*\*\*\*

| ATOM | CARTESIAN COORDINATES |                   |                   |
|------|-----------------------|-------------------|-------------------|
| 1 c  | 9.49296445774426      | 1.75749546544861  | 1.95031154262732  |
| 2 c  | 6.93133343143266      | 1.26302163030218  | 2.35053970659197  |
| 3 c  | 5.33851611035980      | 0.55721063241525  | 0.33731623590168  |
| 4 c  | 6.39803360647435      | 0.33527498965710  | -2.07911285060051 |
| 5 c  | 8.96949802084407      | 0.81283646979133  | -2.47792169434729 |
| 6 c  | 10.52563011836265     | 1.52774723776726  | -0.47062132016408 |
| 7 c  | 2.59241350157566      | 0.01658364095126  | 1.05308348915784  |
| 8 c  | 0.70955744002266      | -0.56717451670765 | -1.13587266352815 |
| 9 c  | -1.00754176032691     | -2.86459038249601 | -0.60967164251666 |
| 10 c | 0.42230629618742      | -5.14440993353174 | 0.32175066520210  |
| 11 c | -0.96933580705736     | -7.09194201262358 | 1.44699610434003  |
| 12 c | -3.52866324381547     | -6.75007364289715 | 2.09603707602589  |
| 13 c | -4.80677649606689     | -4.44895638966055 | 1.77086569912044  |
| 14 c | -3.20425939947560     | -2.16049138262220 | 1.17049665111870  |
| 15 n | -4.65809043526980     | 0.02675689168238  | 0.03054375406549  |
| 16 c | -3.55485843088597     | 1.75973729054029  | -1.46253682601305 |
| 17 c | -0.87030409399340     | 1.63009130226049  | -2.04842262701128 |
| 18 c | 0.18332605968757      | 3.52774741079940  | -3.51808020960465 |
| 19 c | -1.24901659228769     | 5.54517869496122  | -4.46728928933762 |
| 20 c | -3.85648063914988     | 5.66851738531428  | -3.95617086083812 |
| 21 c | -4.98964649306874     | 3.83277221094208  | -2.49951839558866 |
| 22 c | -7.29420511348228     | 0.35023847822998  | 0.85841947658115  |
| 23 c | -9.22111581986396     | -0.80824568315715 | -0.96117161241592 |
| 24 c | 1.67014714209289      | 1.99210082957096  | 2.94863427243633  |

|      |                    |                   |                   |
|------|--------------------|-------------------|-------------------|
| 25 o | 3.30671353886357   | 2.63141690749611  | 4.79047911600242  |
| 26 c | 5.71814775095977   | 1.40091860141478  | 4.91187988719766  |
| 27 o | -0.39192544403974  | 2.96921445275128  | 2.92056190280738  |
| 28 h | 10.68815068315333  | 2.32055460575233  | 3.54078505535411  |
| 29 h | 5.24448735317400   | -0.24013984468929 | -3.68835748625971 |
| 30 h | 9.75469176154773   | 0.61985008393204  | -4.37902168848506 |
| 31 h | 12.53085497323251  | 1.90800914900796  | -0.78636345296703 |
| 32 h | 2.62844317900229   | -1.80417603269269 | 2.12659709912390  |
| 33 h | 1.88595401642723   | -1.13240058097552 | -2.74918262632323 |
| 34 h | -1.94036743315913  | -3.30186564735189 | -2.44453994691178 |
| 35 h | 2.26562636072165   | -5.52345454847334 | -0.53583034606294 |
| 36 h | -0.07115082822503  | -8.92011051037144 | 1.80381644312883  |
| 37 h | -4.56685054427685  | -8.32827186368505 | 2.93934891969182  |
| 38 h | -6.58629057886477  | -4.19598664525568 | 2.78075065738923  |
| 39 h | -2.40164618407510  | -1.30249520690446 | 2.90528599160711  |
| 40 h | 2.20014722478589   | 3.44306097634472  | -3.94140364925908 |
| 41 h | -0.34515173108682  | 7.00317888138575  | -5.61420819487087 |
| 42 h | -4.99082794764575  | 7.21607618571372  | -4.71593080956692 |
| 43 h | -7.00875566791361  | 3.95787880631210  | -2.14892851423007 |
| 44 h | -7.65356849544061  | 2.37130015530908  | 1.16233111679555  |
| 45 h | -7.44148766622978  | -0.54955290086234 | 2.71436020482297  |
| 46 h | -9.16766491789134  | 0.10528371042756  | -2.83019683990181 |
| 47 h | -11.13569638591476 | -0.57180786857797 | -0.17893735638684 |
| 48 h | -8.84316418316052  | -2.83438633039053 | -1.20326099470192 |
| 49 h | 6.84906932672515   | 2.50292297352292  | 6.25938588205574  |
| 50 h | 5.44882997929054   | -0.51244412607785 | 5.71197494874772  |

\*\*\*\*\*

ATOM                      CARTESIAN GRADIENTS

|      |                   |                   |                   |
|------|-------------------|-------------------|-------------------|
| 1 c  | 0.0000002057023   | -0.00000013335943 | 0.00000120686477  |
| 2 c  | 0.00000081059403  | -0.00000087456407 | -0.00000477808790 |
| 3 c  | 0.00000864591463  | -0.00002139979794 | 0.00000277479626  |
| 4 c  | -0.00000396896648 | 0.00000035275323  | -0.00000118461360 |
| 5 c  | 0.00000391584518  | 0.00000043585726  | -0.00000010274450 |
| 6 c  | -0.00000144521644 | -0.00000071137890 | -0.00000359773763 |
| 7 c  | -0.00000407480650 | -0.00000247396685 | -0.00000785771041 |
| 8 c  | 0.00000225476511  | 0.00001106346231  | 0.00001575825853  |
| 9 c  | 0.00000577906985  | -0.00001056858818 | -0.00000556957474 |
| 10 c | -0.00001202879350 | -0.00002244823546 | 0.00000051604756  |
| 11 c | 0.00001945846120  | 0.00000902128960  | -0.00001430543851 |
| 12 c | -0.00000396885700 | -0.00000414183043 | 0.00000294034595  |
| 13 c | 0.00000722635247  | -0.00000624529020 | -0.00001148956035 |
| 14 c | -0.00000368246591 | -0.00000189372151 | 0.00001390063915  |
| 15 n | 0.00000995621413  | -0.00000122956631 | -0.00000343926063 |
| 16 c | -0.00000573354139 | -0.00000424545279 | 0.00000867798160  |
| 17 c | 0.00000494644535  | -0.00001054223717 | -0.00001934032964 |
| 18 c | -0.00000247677055 | -0.00000363642566 | 0.00000096768894  |
| 19 c | 0.00000114111535  | -0.00000351176102 | -0.00000280925938 |
| 20 c | 0.00000045207770  | -0.00000583141376 | -0.00000182864457 |
| 21 c | 0.00000338817757  | 0.00000289854421  | 0.00000071878421  |
| 22 c | -0.00000980363944 | 0.00000214086827  | 0.00000399950884  |
| 23 c | 0.00000206633329  | -0.00000863997058 | -0.00000385644615 |
| 24 c | -0.00000195110955 | -0.00000471147558 | -0.00000458011365 |
| 25 o | 0.00000036524298  | 0.00000053160420  | 0.00000076513813  |
| 26 c | 0.00000675825422  | 0.00000169435295  | 0.00000004515895  |
| 27 o | 0.00000823353714  | -0.00000669166890 | 0.00000017005656  |
| 28 h | 0.00000314171621  | -0.00001089657479 | -0.00000171115252 |

|      |                   |                   |                   |
|------|-------------------|-------------------|-------------------|
| 29 h | 0.00000021672377  | 0.00000295363844  | -0.00000227847767 |
| 30 h | 0.00000217291940  | -0.00000593711282 | -0.00000073181872 |
| 31 h | -0.00000099088529 | 0.00000406041075  | -0.00000320163229 |
| 32 h | 0.00000476994192  | -0.00000105383573 | 0.00000181354774  |
| 33 h | 0.00000124472448  | -0.00000147267247 | -0.00000222921103 |
| 34 h | -0.00000006971349 | -0.00000236176772 | -0.00000060437100 |
| 35 h | -0.00000241135958 | -0.00000060202665 | -0.00000596437714 |
| 36 h | 0.00000016997549  | -0.00000346215566 | -0.00000354732372 |
| 37 h | 0.00000745937805  | -0.00000181688009 | 0.00000581456975  |
| 38 h | 0.00000225309811  | -0.00000402657512 | -0.00000022445778 |
| 39 h | 0.00000311701097  | -0.00000408283572 | -0.00000402285720 |
| 40 h | 0.00000052324303  | -0.00000059389422 | 0.00000010598277  |
| 41 h | -0.00000017360757 | -0.00000342432645 | 0.00000012527344  |
| 42 h | 0.00000202060451  | 0.00000044392215  | 0.00000718017677  |
| 43 h | 0.00000237068827  | -0.00000607082487 | -0.00000583396736 |
| 44 h | 0.00000117770259  | -0.00000988089486 | 0.00000229985158  |
| 45 h | 0.00000459978565  | -0.00000439776814 | -0.00000025601773 |
| 46 h | 0.00000222409005  | -0.00000183287026 | 0.00000074057374  |
| 47 h | 0.00000290683746  | -0.00000015877393 | 0.00000337093151  |
| 48 h | 0.00000290704162  | 0.00000009524423  | -0.00000267084935 |
| 49 h | 0.00000106204357  | -0.00000370769254 | -0.00000107879646 |
| 50 h | 0.00000245414674  | -0.00000297569957 | -0.00000371206859 |

\*\*\*\*\*

norm of actual CARTESIAN gradient: 7.18638E-05

norm of actual INTERNAL gradient: 1.02934E-04

ENERGY = -1131.9587345589 a.u.; # of cycle = 31

Approximate Hessian read from \$hessapprox data section

Hessian updated according to BFGS formula

Number of zero Hessian eigenvalues: 0

#### HOMO-LUMO Separation

HOMO : -0.16505037 H = -4.49125 eV

LUMO : -0.06910573 H = -1.88046 eV

HOMO-LUMO gap: 0.09594464 H = +2.61079 eV

#### SUMMARY OF EXCITATION ENERGIES AND DIPOLE OSCILLATOR STRENGTHS (velocity/length):

| Exc. | energy (Eh) | energy (eV) | energy (cm-1) | energy (nm) | Osc.(vel) | Osc.(len) |
|------|-------------|-------------|---------------|-------------|-----------|-----------|
| 1 a  | 0.071059    | 1.93361     | 15595.634     | 641.205     | 0.00021   | 0.00029   |
| 2 a  | 0.122489    | 3.33310     | 26883.287     | 371.978     | 0.00173   | 0.00161   |
| 3 a  | 0.124343    | 3.38356     | 27290.218     | 366.432     | 0.00074   | 0.00070   |
| 4 a  | 0.134490    | 3.65967     | 29517.249     | 338.785     | 0.00286   | 0.00264   |
| 5 a  | 0.143924    | 3.91638     | 31587.765     | 316.578     | 0.09356   | 0.09322   |

For the compound **3ad**, ground state: Cartesian coordinates and Cartesian gradients and Energy

: *No Imaginary frequency was observed.*

\*\*\*\*\*

| ATOM | CARTESIAN COORDINATES |                   |                   |
|------|-----------------------|-------------------|-------------------|
| 1 c  | 0.26067620200857      | -3.68228238654757 | -0.32240853928306 |
| 2 c  | -1.34533431327600     | -1.61064171593493 | -0.62614377333982 |
| 3 c  | -3.99336002567330     | -1.99804437168212 | -0.53765732828220 |
| 4 c  | -4.94959626158292     | -4.45667405010828 | -0.22543582637482 |
| 5 c  | -3.30279303502371     | -6.50570358971644 | 0.02215831240997  |
| 6 c  | -0.69525983076538     | -6.12775298609004 | -0.00322195919852 |
| 7 n  | -5.59033160160526     | 0.12847939982181  | -0.72940963449294 |
| 8 c  | -4.73676148748877     | 2.39712834415979  | 0.37235581628893  |
| 9 c  | -2.11253740988143     | 2.90966313298847  | 0.31562180349422  |
| 10 c | -0.52155805355404     | 1.07709711763030  | -1.23167177183712 |
| 11 c | 2.29461202724496      | 1.67131409201432  | -1.24979967623032 |
| 12 o | 3.53301392120473      | 1.32048044851520  | 1.15634801693706  |
| 13 c | 5.80260622984914      | 0.23080098610893  | 0.74166138776891  |
| 14 c | 6.21323079378107      | -0.46498812796810 | -1.78801647888744 |
| 15 c | 3.94032967192099      | 0.26009390450230  | -3.21093373898954 |
| 16 o | 3.41254287976191      | -0.03394931466539 | -5.41704674004559 |
| 17 c | 8.46194461690786      | -1.65795666114138 | -2.51325474822234 |
| 18 c | 10.29883418897861     | -2.11583509683566 | -0.68699135537863 |
| 19 c | 9.82901594485447      | -1.38067037482290 | 1.82380940412111  |
| 20 c | 7.60703793040486      | -0.20958521112253 | 2.61583916427927  |
| 21 f | 11.61995169171293     | -1.82755806849094 | 3.54611001818375  |
| 22 c | -1.19358452228708     | 5.05700975552654  | 1.54644435945920  |

|      |                   |                   |                   |
|------|-------------------|-------------------|-------------------|
| 23 c | -2.83324328485086 | 6.75952526978335  | 2.73426175538626  |
| 24 c | -5.42739466820803 | 6.29366954239678  | 2.70465764462752  |
| 25 c | -6.38184169467181 | 4.11659345546158  | 1.55370609275606  |
| 26 c | -8.27146967510763 | -0.23457925612742 | -1.15206376833810 |
| 27 h | 2.30300033751076  | -3.42232129731898 | -0.37222775141024 |
| 28 h | -6.98168966460080 | -4.78402976139162 | -0.13423336006193 |
| 29 h | -4.07929693647154 | -8.40477180037278 | 0.26524445873535  |
| 30 h | 0.60034872043132  | -7.72132034437294 | 0.20615415551560  |
| 31 h | -1.05829232150718 | 1.38568923187239  | -3.23963654459720 |
| 32 h | 2.49570015333095  | 3.69352118168610  | -1.73870375125026 |
| 33 h | 8.74987210790695  | -2.20234295409592 | -4.48424744566067 |
| 34 h | 12.09501294828950 | -3.02385345936864 | -1.13667505900025 |
| 35 h | 7.31702649062326  | 0.31966386713604  | 4.58580238010995  |
| 36 h | 0.83508941422424  | 5.42469573325634  | 1.59149474998641  |
| 37 h | -2.07829108504291 | 8.43756764628877  | 3.67091878310982  |
| 38 h | -6.73210408399826 | 7.60846518755333  | 3.61996125664811  |
| 39 h | -8.40769611741286 | 3.74757010978611  | 1.62375945850783  |
| 40 h | -8.55435243626020 | -1.72179579530307 | -2.57366840416342 |
| 41 h | -9.09709100832112 | 1.51862766577282  | -1.89877714032627 |
| 42 h | -9.32596675335558 | -0.77099944878811 | 0.57591577704109  |

\*\*\*\*\*

| ATOM | CARTESIAN GRADIENTS |                   |                   |
|------|---------------------|-------------------|-------------------|
| 1 c  | -0.00000960640627   | 0.00000513203771  | 0.00000155908308  |
| 2 c  | -0.00000981855061   | 0.00000064751849  | 0.00000925961945  |
| 3 c  | 0.00001237532223    | 0.00000298417509  | -0.00001653404521 |
| 4 c  | -0.00000615899719   | 0.00000705821951  | -0.00000973913635 |
| 5 c  | -0.00001222379831   | -0.00000265756774 | -0.00000429617525 |
| 6 c  | -0.00000569259992   | -0.00000924099919 | -0.00001518137772 |

|      |                   |                   |                   |
|------|-------------------|-------------------|-------------------|
| 7 n  | -0.00000938029982 | -0.00000029235866 | -0.00001278964925 |
| 8 c  | 0.00001413004427  | -0.00000732885265 | 0.00003252880163  |
| 9 c  | -0.00000281264027 | -0.00000629522250 | 0.00001017152558  |
| 10 c | -0.00001139709854 | -0.00000049288681 | -0.00001282125071 |
| 11 c | 0.00000977444263  | -0.00002042640079 | -0.00004539468825 |
| 12 o | 0.00003286682570  | 0.00001056879370  | 0.00000426345791  |
| 13 c | -0.00001441075813 | -0.00000798537417 | 0.00000193082155  |
| 14 c | -0.00000823681502 | -0.00001639589406 | 0.00000200997819  |
| 15 c | 0.00003596179597  | 0.00003033987637  | 0.00001146918284  |
| 16 o | -0.00001695095484 | -0.00005988256847 | 0.00000945348839  |
| 17 c | -0.00000220337482 | -0.00003931135804 | 0.00000482496662  |
| 18 c | -0.00000353823204 | -0.00002999578928 | 0.00000723027804  |
| 19 c | -0.00001738035431 | -0.00004635021695 | 0.00000646259831  |
| 20 c | 0.00001703690587  | 0.00002259013593  | -0.00000451814265 |
| 21 f | 0.00000907790462  | -0.00000075080333 | 0.00000115518810  |
| 22 c | 0.00000670312984  | -0.00000434255859 | -0.00000430736170 |
| 23 c | 0.00001843050681  | -0.00000594978582 | 0.00000798914623  |
| 24 c | 0.00000792101741  | -0.00001276427952 | 0.00001865058674  |
| 25 c | 0.00000826614072  | 0.00001309632882  | 0.00000013116211  |
| 26 c | 0.00001446967015  | 0.00000963444642  | 0.00000874863726  |
| 27 h | -0.00000910339521 | -0.00001843266332 | -0.00000064464733 |
| 28 h | -0.00000669194928 | 0.00000641795124  | -0.00001408124044 |
| 29 h | -0.00001317079128 | 0.00000517421671  | 0.00000017377641  |
| 30 h | -0.00001114495376 | -0.00000401866874 | -0.00002504443688 |
| 31 h | 0.00001424616887  | -0.00000164063322 | 0.00000773925021  |
| 32 h | -0.00000478529319 | -0.00001461062588 | 0.00001373849497  |
| 33 h | -0.00000134095950 | -0.00002060565379 | 0.00000806985987  |
| 34 h | -0.00001530651099 | -0.00003676334187 | -0.00000035321563 |



|      |                   |                   |                   |
|------|-------------------|-------------------|-------------------|
| 35 h | -0.00000433372503 | -0.00003053491862 | -0.00000060416443 |
| 36 h | 0.00000059515804  | -0.00001764140627 | 0.00002867153362  |
| 37 h | 0.00001344562333  | -0.00000722986315 | 0.00000138851062  |
| 38 h | 0.00001462041684  | -0.00000230160772 | 0.00000721679004  |
| 39 h | 0.00001348167612  | -0.00000669264614 | 0.00002157341643  |
| 40 h | -0.00000102665828 | 0.00001379116935  | -0.00000355568685 |
| 41 h | 0.00000464213905  | 0.00000899076304  | 0.00000176362810  |
| 42 h | 0.00000020817755  | 0.00000711759296  | -0.00000643076633 |

\*\*\*\*\*

norm of actual CARTESIAN gradient: 1.73025E-04

norm of actual INTERNAL gradient: 4.37857E-04

ENERGY = -1151.5196908270 a.u.; # of cycle = 17

Approximate Hessian read from \$hessapprox data section

Hessian updated according to BFGS formula

Number of zero Hessian eigenvalues: 0

```

-----
| total energy   = -1151.51969188143 |
-----
: kinetic energy = 1140.37897385328 :
: potential energy = -2291.89866573471 :
: virial theorem = 1.99032520407 :

```

: wavefunction norm = 1.0000000000 :

### HOMO-LUMO Separation

HOMO : -0.19734914 H = -5.37015 eV

LUMO : -0.06736950 H = -1.83322 eV

HOMO-LUMO gap: 0.12997964 H = +3.53693 eV

For the compound **3ad**, Excited State : Cartesian coordinates and Cartesian gradients and Energy

\*\*\*\*\*

| ATOM | CARTESIAN COORDINATES |                   |                   |
|------|-----------------------|-------------------|-------------------|
| 1 c  | 0.29081029190775      | -3.66715334457911 | -0.53672143959168 |
| 2 c  | -1.30868436638709     | -1.57543976152157 | -0.60375148446418 |
| 3 c  | -3.96699931683994     | -2.01325146594082 | -0.44532352018588 |
| 4 c  | -4.94194467930421     | -4.50325262382101 | -0.28071947101106 |
| 5 c  | -3.29757582672369     | -6.53871589698236 | -0.21076967976872 |
| 6 c  | -0.68191628062205     | -6.11681192412263 | -0.32728300834129 |
| 7 n  | -5.60537240130492     | 0.05272522625501  | -0.37118597566428 |
| 8 c  | -4.75237754842487     | 2.41599903127672  | 0.45025267678807  |
| 9 c  | -2.12093695600475     | 2.95038128052880  | 0.32010832660724  |
| 10 c | -0.43941617983357     | 1.11058038837669  | -1.08446327715902 |
| 11 c | 2.38396577787963      | 1.70187994782931  | -1.03939527339850 |
| 12 o | 3.54911317642040      | 1.25684246534803  | 1.34659429365532  |
| 13 c | 5.88711327104025      | 0.16955482403958  | 0.86756930694229  |
| 14 c | 6.17131870942332      | -0.49160957410592 | -1.73628488938559 |
| 15 c | 3.95481906553625      | 0.25244104572635  | -3.05230772563383 |

|      |                   |                   |                   |
|------|-------------------|-------------------|-------------------|
| 16 o | 3.15165432296470  | -0.01987409152098 | -5.26108930865744 |
| 17 c | 8.45758362434463  | -1.73917190242602 | -2.47576885348557 |
| 18 c | 10.31918732135292 | -2.19526668728251 | -0.64957077244795 |
| 19 c | 9.94509058869124  | -1.47377734950309 | 1.85240402826732  |
| 20 c | 7.68392924226024  | -0.26968753324401 | 2.68360417931366  |
| 21 f | 11.77268169755916 | -1.91606543079835 | 3.59780994975974  |
| 22 c | -1.26787509932744 | 5.20545688719634  | 1.38708108872874  |
| 23 c | -2.95247925519167 | 6.93198021514629  | 2.47062090931895  |
| 24 c | -5.55329430002046 | 6.43460682194464  | 2.50073563261181  |
| 25 c | -6.45978827149912 | 4.18488468329677  | 1.50179189197189  |
| 26 c | -8.30105280805705 | -0.32111761205561 | -0.85367842813942 |
| 27 h | 2.31967418137687  | -3.39767368995336 | -0.68376972015629 |
| 28 h | -6.96721548842230 | -4.83692671020075 | -0.12964582144132 |
| 29 h | -4.04311855297227 | -8.45595195687086 | -0.04930174795671 |
| 30 h | 0.62160459673594  | -7.71534585128970 | -0.27146527013491 |
| 31 h | -0.87266588692619 | 1.38254921508766  | -3.13130763418700 |
| 32 h | 2.56406672359077  | 3.73775087406727  | -1.50840075567802 |
| 33 h | 8.73855243914140  | -2.29231775248072 | -4.44131975927816 |
| 34 h | 12.09958243131032 | -3.11499299435872 | -1.14985063269070 |
| 35 h | 7.42015526201669  | 0.25112476831055  | 4.65906658689744  |
| 36 h | 0.74717933777308  | 5.61505079662365  | 1.39602256464976  |
| 37 h | -2.22662571473901 | 8.67680451046571  | 3.30066774536655  |
| 38 h | -6.86742947253310 | 7.78477536918974  | 3.34204605895630  |
| 39 h | -8.47335312609098 | 3.77343976150678  | 1.61464952213884  |
| 40 h | -8.54442973599126 | -1.81465943268403 | -2.26556119055432 |
| 41 h | -9.10667329662326 | 1.42741599440216  | -1.61418566040906 |
| 42 h | -9.32685749748601 | -0.84718052088046 | 0.88209653784279  |

\*\*\*\*\*

| ATOM | CARTESIAN GRADIENTS |                   |                   |
|------|---------------------|-------------------|-------------------|
| 1 c  | 0.00000246145337    | 0.00000260808614  | -0.00002071427653 |
| 2 c  | -0.00000341898541   | -0.00001073124866 | 0.00004398518230  |
| 3 c  | -0.00000115423348   | 0.00000243163064  | -0.00003680113504 |
| 4 c  | -0.00000963158238   | 0.00000689400334  | -0.00001721620262 |
| 5 c  | -0.00000120570156   | 0.00000267274870  | -0.00000080229272 |
| 6 c  | -0.00001249244502   | -0.00000636767808 | 0.00000303004920  |
| 7 n  | 0.00000139079075    | 0.00000243529575  | -0.00000063117157 |
| 8 c  | 0.00000912042998    | 0.00002525314952  | -0.00003814410879 |
| 9 c  | 0.00000789952210    | 0.00000057361974  | 0.00000002737172  |
| 10 c | 0.00001590773878    | 0.00000024439520  | -0.00000244920697 |
| 11 c | 0.00001604188823    | -0.00004204963423 | -0.00002380972298 |
| 12 o | -0.00000121647433   | -0.00001558389438 | 0.00002268467190  |
| 13 c | 0.00001645042715    | -0.00001774980839 | -0.00000018259105 |
| 14 c | 0.00000325847262    | -0.00001406140076 | 0.00001022930809  |
| 15 c | -0.00000334026369   | 0.00000577232317  | 0.00000068490549  |
| 16 o | 0.00000678310361    | -0.00001447152970 | 0.00000598821131  |
| 17 c | 0.00000171513902    | -0.00001592667530 | 0.00000596923760  |
| 18 c | -0.00000372412719   | -0.00002400393263 | 0.00000364330253  |
| 19 c | 0.00000585812960    | -0.00002633360222 | 0.00000330844077  |
| 20 c | -0.00000770809548   | -0.00001945369548 | 0.00000989901044  |
| 21 f | -0.00000037408294   | -0.00001616142661 | 0.00000211520220  |
| 22 c | 0.00001715570329    | 0.00000168750934  | 0.00001655517031  |
| 23 c | 0.00000491934594    | -0.00001217322569 | 0.00001099406882  |
| 24 c | 0.00001691309217    | -0.00000854102871 | 0.00001492626616  |
| 25 c | 0.00000266942913    | -0.00001214406740 | 0.00000970068799  |
| 26 c | -0.00001006554761   | 0.00000878147344  | 0.00000253778584  |
| 27 h | 0.00000118355877    | -0.00000383975719 | 0.00001039489655  |

|      |                   |                   |                   |
|------|-------------------|-------------------|-------------------|
| 28 h | -0.00000696374950 | 0.00000910974788  | 0.00000141965285  |
| 29 h | -0.00000927099246 | -0.00000079665069 | -0.00001104432002 |
| 30 h | -0.00000955428027 | -0.00000830039989 | -0.00002880429175 |
| 31 h | -0.00000964492949 | -0.00000790345375 | 0.00000382289723  |
| 32 h | -0.00000326910375 | -0.00001251485147 | 0.00001156762153  |
| 33 h | 0.00000465742839  | -0.00000131846271 | -0.00000128577851 |
| 34 h | -0.00001333892295 | -0.00004791865491 | 0.00001064647940  |
| 35 h | 0.00000874740080  | -0.00000984706898 | 0.00000307810012  |
| 36 h | 0.00000801602937  | -0.00000916667789 | -0.00000114989786 |
| 37 h | 0.00001371265292  | -0.00001132468361 | 0.00002015914624  |
| 38 h | 0.00001146438668  | 0.00000372116662  | 0.00000111204263  |
| 39 h | 0.00000649977547  | -0.00000154535081 | 0.00000063861793  |
| 40 h | 0.00000533665677  | 0.00000414755408  | -0.00000661095544 |
| 41 h | 0.00000851192761  | 0.00001037216102  | 0.00000489570858  |
| 42 h | -0.00000163051958 | 0.00000227155671  | -0.00000637466928 |

\*\*\*\*\*

norm of actual CARTESIAN gradient: 1.48504E-04

norm of actual INTERNAL gradient: 2.32210E-04

ENERGY = -1151.4223245090 a.u.; # of cycle = 17

Approximate Hessian read from \$hessapprox data section

Hessian updated according to BFGS formula

Number of zero Hessian eigenvalues: 0

```

-----
| total energy   = -1151.50601902373 |
-----
: kinetic energy = 1140.13015218496 :
: potential energy = -2291.63617120869 :
: virial theorem = 1.99012087940 :
: wavefunction norm = 1.00000000000 :

```

#### HOMO-LUMO Separation

```

HOMO   : -0.18630132 H = -5.06952 eV
LUMO   : -0.08410306 H = -2.28856 eV
HOMO-LUMO gap: 0.10219826 H = +2.78096 eV

```

#### SUMMARY OF EXCITATION ENERGIES AND DIPOLE OSCILLATOR STRENGTHS (velocity/length):

```

-----
| Exc. | energy (Eh) | energy (eV) | energy (cm-1) | energy (nm) | Osc.(vel) | Osc.(len) |
-----
| 1 a | 0.083693 | 2.27741 | 18368.567 | 544.408 | 0.00330 | 0.00307 |
| 2 a | 0.122327 | 3.32870 | 26847.775 | 372.470 | 0.00088 | 0.00068 |
| 3 a | 0.139406 | 3.79343 | 30596.077 | 326.839 | 0.00067 | 0.00057 |
| 4 a | 0.142132 | 3.86761 | 31194.347 | 320.571 | 0.00274 | 0.00285 |
| 5 a | 0.143783 | 3.91254 | 31556.732 | 316.890 | 0.00550 | 0.00577 |
-----

```

For the compound **6af**, ground state : Cartesian coordinates and Cartesian gradients and Energy

: *No Imaginary frequency was observed.*

| ATOM | CARTESIAN COORDINATES |                   |                   |
|------|-----------------------|-------------------|-------------------|
| 1 c  | 1.84453150829968      | 4.57552922126266  | -1.99730646580209 |
| 2 c  | 0.26558855572869      | 2.63192733456430  | -1.14866906168663 |
| 3 c  | -1.62164978459954     | 3.17685337536320  | 0.66061694770401  |
| 4 c  | -1.83547821004398     | 5.64707082452772  | 1.62023095035063  |
| 5 c  | -0.20881859006384     | 7.54657833729932  | 0.78022735724043  |
| 6 c  | 1.62650361795003      | 7.02766073356186  | -1.04348355339494 |
| 7 n  | -3.28173423427096     | 1.22965904683489  | 1.41631373168762  |
| 8 c  | -3.86952447880835     | -0.67550474909000 | -0.33489930342318 |
| 9 c  | -2.05890467385835     | -1.30252669640283 | -2.19997137549323 |
| 10 c | 0.52197087787239      | -0.06462332579596 | -2.08335364179867 |
| 11 c | 2.42388394537509      | -1.73878145603059 | -0.51679356149739 |
| 12 c | 5.16819352452151      | -1.16202077231305 | -1.19572766806825 |
| 13 o | 5.87885699909609      | 0.18737089023455  | -2.88993664687173 |
| 14 o | 6.74704664902535      | -2.48499272494948 | 0.28833753041667  |
| 15 c | 9.39078378994560      | -2.13211038656488 | -0.13860211881781 |
| 16 c | 2.04184797343988      | -1.60069597527316 | 2.36668284458984  |
| 17 o | 2.77224105987471      | 0.21477926148404  | 3.54823576733111  |
| 18 c | 0.75597676612387      | -3.83446501529635 | 3.60461981416071  |
| 19 c | -2.65069942823511     | -3.12233073373098 | -4.02188210147713 |
| 20 c | -4.96979914397646     | -4.38857814752155 | -4.00447760790771 |
| 21 c | -6.73250518874725     | -3.80273355985211 | -2.12854898039170 |
| 22 c | -6.20644527284020     | -1.95460394681240 | -0.31837241163060 |
| 23 c | -4.86602732879157     | 1.58749527171529  | 3.62120886690806  |
| 24 h | 3.30046818851603      | 4.12303717322880  | -3.38661163431738 |
| 25 h | -3.29596789658782     | 6.11422219327581  | 2.99618672117976  |

|      |                   |                   |                   |
|------|-------------------|-------------------|-------------------|
| 26 h | -0.40635105908972 | 9.45574934807758  | 1.54587145418616  |
| 27 h | 2.88908653297555  | 8.51798905554396  | -1.71334127492785 |
| 28 h | 1.33842859799561  | -0.02659047478335 | -3.99370196351214 |
| 29 h | 2.11805675317823  | -3.71022086173168 | -1.12528467120677 |
| 30 h | 9.91466185538451  | -0.13756853707677 | 0.12723640211927  |
| 31 h | 9.91020067645605  | -2.70378460574247 | -2.07016724218370 |
| 32 h | 10.36333465731530 | -3.32240885214397 | 1.25259678008548  |
| 33 h | -1.00705769577521 | -4.33272932105314 | 2.61433703611574  |
| 34 h | 0.37930546806585  | -3.41745228679709 | 5.60262419491180  |
| 35 h | 2.01887603789758  | -5.49021371060422 | 3.47296452163358  |
| 36 h | -1.24403194054132 | -3.57171529050986 | -5.47043877255857 |
| 37 h | -5.39247815487467 | -5.81376675227117 | -5.43714316054106 |
| 38 h | -8.56118841490270 | -4.76375972962410 | -2.08483242340531 |
| 39 h | -7.64507143703973 | -1.48074883486244 | 1.07772963675961  |
| 40 h | -3.77775560622869 | 2.55428423281604  | 5.10164220843269  |
| 41 h | -6.59293209975864 | 2.70540810587069  | 3.23486990066780  |
| 42 h | -5.44542339599951 | -0.26068765882576 | 4.37101297443117  |

\*\*\*\*\*

| ATOM | CARTESIAN GRADIENTS |                   |                   |
|------|---------------------|-------------------|-------------------|
| 1 c  | -0.00001040577753   | 0.00000101579697  | -0.00000439380256 |
| 2 c  | -0.00000303747282   | 0.00000163308408  | 0.00002035631468  |
| 3 c  | 0.00001039125840    | -0.00000587768576 | 0.00002355746481  |
| 4 c  | 0.00000259528798    | -0.00000279157153 | 0.00000616406216  |
| 5 c  | 0.00000141372145    | 0.00000171684418  | 0.00001469812488  |
| 6 c  | -0.00001778416000   | 0.00000595046548  | -0.00001948437278 |
| 7 n  | -0.00000245131292   | 0.00000681906446  | -0.00000111798893 |
| 8 c  | 0.00000904702730    | -0.00004049458851 | 0.00002446583103  |
| 9 c  | -0.00000763653916   | 0.00004294823884  | -0.00002018047802 |



|      |                   |                   |                   |
|------|-------------------|-------------------|-------------------|
| 10 c | -0.00001348842488 | 0.00001139199879  | -0.00002178443188 |
| 11 c | 0.00003450768353  | -0.00000298996690 | 0.00002554027035  |
| 12 c | -0.00000674839863 | -0.00003557181912 | 0.00000838457351  |
| 13 o | 0.00001225188147  | 0.00003197687199  | -0.00000147421399 |
| 14 o | -0.00001730886095 | 0.00002579409187  | -0.00001870498227 |
| 15 c | -0.00000425496127 | 0.00001530672399  | 0.00001337382788  |
| 16 c | 0.00000796078619  | 0.00000030989391  | -0.00003972666230 |
| 17 o | -0.00001556388270 | 0.00000352683592  | 0.00002051890973  |
| 18 c | 0.00002856263701  | 0.00000148639024  | 0.00000292623671  |
| 19 c | 0.00000339092606  | 0.00000943103860  | -0.00000045360082 |
| 20 c | 0.00000437626854  | -0.00000181895538 | 0.00000906720329  |
| 21 c | 0.00000221170991  | -0.00000336119770 | 0.00000303889827  |
| 22 c | 0.00000893793238  | 0.00000985692218  | 0.00001234685916  |
| 23 c | 0.00000440518181  | -0.00000712031174 | 0.00000837512024  |
| 24 h | 0.00000121245079  | 0.00000397960661  | -0.00000009898519 |
| 25 h | -0.00000273270645 | 0.00000412801264  | -0.00000215895126 |
| 26 h | 0.00001438171574  | -0.00000214961181 | 0.00002043013134  |
| 27 h | -0.00001466113985 | 0.00001090661841  | -0.00000624615895 |
| 28 h | 0.00000339229447  | -0.00000441928668 | 0.00000248950561  |
| 29 h | 0.00000032230756  | 0.00001357726937  | 0.00000026207093  |
| 30 h | 0.00000042283261  | 0.00000575579423  | -0.00001461106767 |
| 31 h | 0.00000862046617  | -0.00000242259472 | -0.00000165345244 |
| 32 h | 0.00000274617538  | 0.00001149740044  | -0.00000392008971 |
| 33 h | 0.00000548348789  | 0.00000747312851  | -0.00000251645587 |
| 34 h | 0.00000620746757  | -0.00000422019686 | -0.00000182224278 |
| 35 h | -0.00000635046583 | -0.00000458387536 | -0.00000425516620 |
| 36 h | 0.00000185591925  | -0.00000138410842 | 0.00000607942106  |
| 37 h | 0.00001249511560  | -0.00001934918329 | 0.00002118404074  |

|      |                   |                   |                   |
|------|-------------------|-------------------|-------------------|
| 38 h | -0.00000276797326 | 0.00001117221084  | -0.00000528324818 |
| 39 h | -0.00000522839002 | 0.00001048499597  | -0.00000872265689 |
| 40 h | 0.00000377749179  | -0.00000266013095 | 0.00000285904862  |
| 41 h | 0.00000212138106  | -0.00000189272710 | 0.00001110215301  |
| 42 h | 0.00000911667330  | 0.00000081837481  | 0.00000475596221  |

\*\*\*\*\*

norm of actual CARTESIAN gradient: 1.46202E-04

norm of actual INTERNAL gradient: 4.05506E-04

ENERGY = -1014.5651095250 a.u.; # of cycle = 75

Approximate Hessian read from \$hessapprox data section

Hessian updated according to BFGS formula

Number of zero Hessian eigenvalues: 0

```

-----
| total energy   = -1014.56510970676 |
-----
: kinetic energy = 1004.38502383314 :
: potential energy = -2018.95013353990 :
: virial theorem = 1.98996605957 :
: wavefunction norm = 1.00000000000 :
.....

```

HOMO-LUMO Separation

HOMO : -0.19249348 H = -5.23802 eV  
LUMO : -0.01910772 H = -0.51995 eV  
HOMO-LUMO gap: 0.17338577 H = +4.71807 eV

For the compound **6af**, Excited State: Cartesian coordinates and Cartesian gradients and Energy

\*\*\*\*\*

| ATOM | CARTESIAN COORDINATES |                   |                   |
|------|-----------------------|-------------------|-------------------|
| 1 c  | 1.90594005872317      | 4.55455304733418  | -1.65340664772712 |
| 2 c  | 0.14325644334920      | 2.69313411101622  | -1.05482403124737 |
| 3 c  | -1.94547448929844     | 3.38046193692489  | 0.52726283820442  |
| 4 c  | -2.09874336097465     | 5.85119485499014  | 1.56778773788764  |
| 5 c  | -0.30232548174650     | 7.64287136554052  | 0.95052507353697  |
| 6 c  | 1.69754818038096      | 7.00051720114850  | -0.68063461995047 |
| 7 n  | -3.82415806438470     | 1.65984536841666  | 0.99771005382349  |
| 8 c  | -4.20052913730959     | -0.41529832413518 | -0.62237259079219 |
| 9 c  | -2.21404056962008     | -1.19851957843533 | -2.22101609004770 |
| 10 c | 0.37256094181178      | 0.00042727917443  | -2.00721181589842 |
| 11 c | 2.15723850630910      | -1.77592721658968 | -0.44841622255324 |
| 12 c | 4.92569253038398      | -1.28610626785414 | -0.99259053078111 |
| 13 o | 5.91095903724679      | 0.69558530754376  | -1.63055576387059 |
| 14 o | 6.32558568223904      | -3.37873797981573 | -0.49918295834724 |
| 15 c | 8.99346111048772      | -3.07827884458283 | -0.60832505827848 |
| 16 c | 1.60171280691290      | -1.66507978760995 | 2.44681975458281  |
| 17 o | 1.02140987684109      | 0.47252581807994  | 3.45386881611538  |
| 18 c | 2.80634936559582      | -3.71921922991723 | 4.03157344130796  |

|      |                   |                    |                   |
|------|-------------------|--------------------|-------------------|
| 19 c | -2.67114570016486 | -3.18519603337904  | -3.90141455225414 |
| 20 c | -5.01860885464079 | -4.387747444400728 | -4.01224894456115 |
| 21 c | -6.97020348641491 | -3.60617640570917  | -2.40884356507242 |
| 22 c | -6.57000607048959 | -1.62985710005541  | -0.71993678614431 |
| 23 c | -5.36062257026567 | 1.90689953551691   | 3.27889612732099  |
| 24 h | 3.53036151921052  | 4.03039370257349   | -2.80020569848683 |
| 25 h | -3.67919934051662 | 6.36894312093958   | 2.78039909097570  |
| 26 h | -0.45443191043858 | 9.55611682171376   | 1.70994815667313  |
| 27 h | 3.11778235971879  | 8.41635424841255   | -1.17107992424198 |
| 28 h | 1.17409227447028  | 0.10880318854795   | -3.92704366021188 |
| 29 h | 1.80223579499069  | -3.72381655767506  | -1.10262499282944 |
| 30 h | 9.64465793732239  | -1.64709921923446  | 0.75529437452930  |
| 31 h | 9.60621567580007  | -2.48537387292121  | -2.50815681681320 |
| 32 h | 9.80854224679264  | -4.92799878573313  | -0.13846569945225 |
| 33 h | 2.71481777541775  | -5.59381147034925  | 3.12098654063333  |
| 34 h | 1.80688551961276  | -3.81413082210846  | 5.85815039697717  |
| 35 h | 4.83410932968295  | -3.38050087471911  | 4.48321625919450  |
| 36 h | -1.14010367990446 | -3.81055873533416  | -5.13914106327713 |
| 37 h | -5.32577578282366 | -5.93165726374877  | -5.34806459243808 |
| 38 h | -8.81749663874593 | -4.52472861776070  | -2.48501957956104 |
| 39 h | -8.11802775207504 | -1.00063328923065  | 0.48452827533811  |
| 40 h | -4.17287904333668 | 2.67496098864809   | 4.79018424479036  |
| 41 h | -7.02406217671608 | 3.12614176170494   | 2.97657449689247  |
| 42 h | -5.99358086342977 | 0.02672406268087   | 3.86705652605260  |

\*\*\*\*\*

ATOM                    CARTESIAN GRADIENTS

|     |                   |                   |                   |
|-----|-------------------|-------------------|-------------------|
| 1 c | -0.00001421973345 | -0.00002376672178 | -0.00000380490944 |
| 2 c | 0.00000480428587  | 0.00000721800214  | -0.00001749538483 |

|      |                   |                   |                   |
|------|-------------------|-------------------|-------------------|
| 3 c  | -0.00001841603840 | -0.00002687306014 | 0.00000948858001  |
| 4 c  | -0.00000328864960 | 0.00000838315310  | 0.00000181492463  |
| 5 c  | -0.00000283127894 | -0.00000439099690 | 0.00000903179649  |
| 6 c  | -0.00000135836169 | 0.00001250210444  | -0.00000131137537 |
| 7 n  | -0.00000136821064 | 0.00001099293169  | 0.00000601248912  |
| 8 c  | 0.00000590570444  | -0.00000834994339 | -0.00002318478084 |
| 9 c  | -0.00000206793276 | -0.00001127010213 | 0.00000915810195  |
| 10 c | -0.00001136298825 | 0.00001507973600  | 0.00000140970843  |
| 11 c | 0.00001121516307  | 0.00000325377269  | 0.00000536613195  |
| 12 c | 0.00000623598637  | 0.00000413822739  | 0.00000651092974  |
| 13 o | -0.00001157044430 | -0.00000150421607 | -0.00000020463037 |
| 14 o | -0.00001392647948 | 0.00000447603513  | -0.00000495619158 |
| 15 c | 0.00000077276969  | 0.00000193410462  | -0.00000705441882 |
| 16 c | -0.00000434766601 | 0.00000313520008  | 0.00000187121187  |
| 17 o | 0.00000401225449  | -0.00000526795927 | 0.00000334248837  |
| 18 c | 0.00001398538216  | 0.00000870729703  | 0.00000437529611  |
| 19 c | -0.00000995406709 | -0.00000352960547 | 0.00000283228824  |
| 20 c | -0.00000274801909 | -0.00000571868269 | -0.00000059496281 |
| 21 c | -0.00000084399123 | 0.00000031283488  | 0.00000496337463  |
| 22 c | 0.00000403693086  | 0.00001382814452  | 0.00000597025092  |
| 23 c | -0.00001434684496 | -0.00000175393272 | 0.00000117994143  |
| 24 h | 0.00000356684263  | 0.00001286507070  | 0.00000940381375  |
| 25 h | -0.00000291351760 | 0.00000094076045  | 0.00000193826561  |
| 26 h | -0.00000966326122 | -0.00000039773895 | 0.00000002658735  |
| 27 h | -0.00000331056649 | -0.00000282258359 | 0.00000012582867  |
| 28 h | 0.00000476257490  | -0.00000306944817 | 0.00000723968840  |
| 29 h | -0.00000444695152 | -0.00000429420100 | 0.00000190738953  |
| 30 h | -0.00000962428384 | 0.00000289391193  | -0.00000615342009 |

|      |                   |                   |                   |
|------|-------------------|-------------------|-------------------|
| 31 h | -0.00000390542745 | 0.00000234432761  | -0.00000201664756 |
| 32 h | -0.00000168288820 | 0.00000262252449  | -0.00000255812452 |
| 33 h | -0.00000242209945 | -0.00000529393917 | 0.00000048763804  |
| 34 h | -0.00000805080635 | -0.00000131262247 | -0.00000777203069 |
| 35 h | -0.00000453525290 | -0.00000347617123 | -0.00000940862190 |
| 36 h | -0.00000657589108 | 0.00000465149920  | -0.00000623449653 |
| 37 h | -0.00000487993354 | 0.00000302418291  | -0.00000278445384 |
| 38 h | -0.00000239194428 | -0.00000259790526 | 0.00000289689141  |
| 39 h | -0.00000425069413 | -0.00000291179825 | 0.00001112820784  |
| 40 h | -0.00000666395956 | -0.00000637168220 | 0.00000686277913  |
| 41 h | -0.00000262116945 | -0.00000223632816 | 0.00000046423842  |
| 42 h | 0.00000188231938  | -0.00000843330695 | 0.00000573040287  |

\*\*\*\*\*

norm of actual CARTESIAN gradient: 8.54368E-05

norm of actual INTERNAL gradient: 1.32141E-04

ENERGY = -1014.4546245576 a.u.; # of cycle = 32

Approximate Hessian read from \$hessapprox data section

Hessian updated according to BFGS formula

Number of zero Hessian eigenvalues: 0

```

-----
| total energy   = -1014.53091746416 |
-----
: kinetic energy = 1004.20103409037 :

```

: potential energy = -2018.73195155453 :  
 : virial theorem = 1.98981806942 :  
 : wavefunction norm = 1.00000000000 :

### HOMO-LUMO Separation

HOMO : -0.17397827 H = -4.73419 eV  
 LUMO : -0.06871949 H = -1.86995 eV  
 HOMO-LUMO gap: 0.10525877 H = +2.86424 eV

### SUMMARY OF EXCITATION ENERGIES AND DIPOLE OSCILLATOR STRENGTHS (velocity/length):

| Exc. | energy (Eh) | energy (eV) | energy (cm-1) | energy (nm) | Osc.(vel) | Osc.(len) |
|------|-------------|-------------|---------------|-------------|-----------|-----------|
| 1 a  | 0.076290    | 2.07597     | 16743.806     | 597.236     | 0.00307   | 0.00276   |
| 2 a  | 0.116103    | 3.15933     | 25481.751     | 392.438     | 0.00188   | 0.00178   |
| 3 a  | 0.136640    | 3.71815     | 29988.906     | 333.457     | 0.03107   | 0.02564   |
| 4 a  | 0.138022    | 3.75577     | 30292.350     | 330.116     | 0.00924   | 0.00769   |
| 5 a  | 0.146167    | 3.97740     | 32079.865     | 311.722     | 0.00796   | 0.00744   |

For the compound **3bd**, ground state: Cartesian coordinates and Cartesian gradients and Energy

: *No Imaginary frequency was observed.*

\*\*\*\*\*

| ATOM | CARTESIAN COORDINATES |                  |                  |
|------|-----------------------|------------------|------------------|
| 1 c  | 0.90333677437769      | 2.98302744356195 | 1.21869220332808 |

|      |                   |                   |                   |
|------|-------------------|-------------------|-------------------|
| 2 c  | -0.36559316062527 | 0.78299739031835  | 0.50118181838294  |
| 3 c  | -2.77854246142722 | 0.27759455621114  | 1.53775795011013  |
| 4 c  | -3.89034647805524 | 2.02557512775381  | 3.19610827229154  |
| 5 c  | -2.60468307407666 | 4.23559066955884  | 3.85199629240538  |
| 6 c  | -0.20031974554959 | 4.71464319772043  | 2.88402162850816  |
| 7 n  | -3.96481010313344 | -2.03182646330509 | 0.88372559597672  |
| 8 c  | -2.36103693589087 | -4.15844960370140 | 0.66188005644445  |
| 9 c  | 0.06010633678281  | -3.77196997636096 | -0.40555369008138 |
| 10 c | 0.54704103248268  | -1.13264394505805 | -1.43813806004347 |
| 11 c | 3.15057141494400  | -0.76047774632413 | -2.60823598040097 |
| 12 o | 5.20937439931153  | -0.82766028287734 | -0.82742777687182 |
| 13 c | 6.84954197370165  | 1.03287941115754  | -1.45512239449191 |
| 14 c | 6.03936756971029  | 2.59938060267558  | -3.41903623760176 |
| 15 c | 3.53731972112675  | 1.66004380140584  | -4.19685521433111 |
| 16 o | 2.07852719111109  | 2.46091812972772  | -5.76626571151607 |
| 17 c | 7.49534925334295  | 4.65219212547667  | -4.25965560358967 |
| 18 c | 9.80109788043830  | 5.06503761686842  | -3.07619108035480 |
| 19 c | 10.63407021352961 | 3.48113881110686  | -1.09366717352844 |
| 20 c | 9.18870289785757  | 1.43757815602295  | -0.23543756618910 |
| 21 o | 9.81422288773367  | -0.17285289708061 | 1.64487881977725  |
| 22 c | 12.12207260729999 | 0.17765944870503  | 2.93226914710720  |
| 23 c | 1.76426526686001  | -5.78577628516402 | -0.51388135337995 |
| 24 c | 1.07806219261858  | -8.19879920561095 | 0.32282656979330  |
| 25 c | -1.33293106633152 | -8.58901829000831 | 1.31405149161923  |
| 26 c | -3.03758143124403 | -6.58145892967151 | 1.51494142659353  |
| 27 c | -6.64704444485317 | -2.38436764444971 | 1.38763703691870  |
| 28 c | -8.37312763857138 | -0.51241834494703 | 0.05287108708401  |
| 29 c | -7.85859305106939 | 0.32341220601926  | -2.40909442014189 |



|      |                    |                    |                   |
|------|--------------------|--------------------|-------------------|
| 30 c | -9.53451675597328  | 1.93472704866152   | -3.66047870544536 |
| 31 c | -11.75848435727516 | 2.72833270832872   | -2.47241902340682 |
| 32 c | -12.28996066335516 | 1.90346341877208   | -0.02026702588353 |
| 33 c | -10.60303806922057 | 0.30037061258409   | 1.23183251859884  |
| 34 h | 2.77016837047694   | 3.39720432168328   | 0.45522233913211  |
| 35 h | -5.75733041100045  | 1.67244872823641   | 3.98864322061442  |
| 36 h | -3.49480134525617  | 5.57849976752329   | 5.14530789117102  |
| 37 h | 0.81469498932005   | 6.43766403591073   | 3.39850433223493  |
| 38 h | -0.72877105009866  | -0.90305733369908  | -3.09223149466502 |
| 39 h | 3.45964109946749   | -2.33490904896280  | -3.94850962251833 |
| 40 h | 6.81135160637765   | 5.85328982077092   | -5.79191491824356 |
| 41 h | 11.01078511076343  | 6.63133798627389   | -3.66580786384868 |
| 42 h | 12.45669723485510  | 3.87587580601850   | -0.21451311690978 |
| 43 h | 13.76040827749350  | 0.00569576423146   | 1.64741970686644  |
| 44 h | 12.23012297613150  | -1.31839497858958  | 4.36667628558954  |
| 45 h | 12.20384936546494  | 2.03602067521692   | 3.88274258985336  |
| 46 h | 3.66612260961281   | -5.48099542674161  | -1.25138012866694 |
| 47 h | 2.42869113382945   | -9.75612207876460  | 0.20465852822845  |
| 48 h | -1.89184663703551  | -10.46013306477434 | 1.98894118979870  |
| 49 h | -4.87378511116131  | -6.91161648854674  | 2.38958896423089  |
| 50 h | -7.14013161469181  | -4.28340345302435  | 0.70172679616071  |
| 51 h | -7.06765257124668  | -2.38406179079976  | 3.43901233445785  |
| 52 h | -6.12029869622938  | -0.28525717641913  | -3.34268089685884 |
| 53 h | -9.09745327844104  | 2.57578689922643   | -5.57551878779050 |
| 54 h | -13.06790098818387 | 3.99074827360331   | -3.45232466104262 |
| 55 h | -14.01900103439175 | 2.51863425019107   | 0.92954918649454  |
| 56 h | -11.02598021330777 | -0.32409835670241  | 3.15852723295352  |

\*\*\*\*\*

| ATOM | CARTESIAN GRADIENTS |                   |                   |
|------|---------------------|-------------------|-------------------|
| 1 c  | -0.00000844175592   | -0.00001574690693 | 0.00000167592159  |
| 2 c  | -0.00002191478754   | 0.00001500688217  | -0.00000962866443 |
| 3 c  | -0.00000965224833   | 0.00000805843285  | -0.00005058059335 |
| 4 c  | -0.00000156105159   | 0.00000756674417  | 0.00001046283191  |
| 5 c  | -0.00001085960548   | -0.00000613031034 | -0.00001936876188 |
| 6 c  | 0.00002966863430    | -0.00002612001296 | 0.00003623117895  |
| 7 n  | -0.00000168493092   | 0.00000835677650  | 0.00003754936132  |
| 8 c  | 0.00003208309044    | 0.00002663157287  | 0.00002543036133  |
| 9 c  | 0.00004032888523    | 0.00000074692570  | 0.00003399029313  |
| 10 c | -0.00002773986110   | 0.00001270178345  | -0.00003758606946 |
| 11 c | -0.00001207779638   | -0.00002813394745 | -0.00005350830856 |
| 12 o | -0.00000334042929   | 0.00000238433009  | 0.00000768338222  |
| 13 c | 0.00001459358378    | 0.00000091801937  | -0.00001257051398 |
| 14 c | -0.00001367421222   | -0.00000363704968 | -0.00002196238912 |
| 15 c | -0.00014433484804   | 0.00010506918089  | -0.00000964998860 |
| 16 o | 0.00014116958059    | -0.00009345517157 | 0.00008299842903  |
| 17 c | 0.00000048500368    | -0.00000326471058 | 0.00000962999334  |
| 18 c | -0.00000774533876   | 0.00000246172679  | 0.00001128664758  |
| 19 c | -0.00000937514266   | 0.00000983494517  | -0.00000038215545 |
| 20 c | 0.00000348354498    | 0.00001564082397  | -0.00004030330779 |
| 21 o | -0.00000619382851   | -0.00000328110074 | 0.00002257853970  |
| 22 c | -0.00000493325921   | 0.00000672056022  | 0.00000976037002  |
| 23 c | -0.00002392772806   | -0.00002236650528 | -0.00001014407968 |
| 24 c | -0.00000656887198   | 0.00000416095798  | 0.00000795509673  |
| 25 c | -0.00001829357655   | 0.00001667871676  | -0.00000675252171 |
| 26 c | -0.00001774764098   | 0.00000644249649  | -0.00002107397717 |
| 27 c | -0.00002615704029   | -0.00003884072727 | -0.00003609040855 |

|      |                   |                   |                   |
|------|-------------------|-------------------|-------------------|
| 28 c | -0.00003492814178 | 0.00000497952452  | 0.00002344540542  |
| 29 c | -0.00002311831150 | -0.00000840986758 | -0.00001807763073 |
| 30 c | 0.00000536529661  | -0.00003375435481 | -0.00000379985355 |
| 31 c | 0.00000883836606  | 0.00003016452587  | 0.00003697477030  |
| 32 c | 0.00000348704796  | 0.00000787628530  | -0.00001771551333 |
| 33 c | 0.00000568054837  | -0.00002477497654 | -0.00001880101575 |
| 34 h | 0.00002764703352  | -0.00000960295301 | 0.00000942169702  |
| 35 h | 0.00000069025394  | -0.00000082345101 | -0.00001674683886 |
| 36 h | 0.00003029987194  | -0.00002656933275 | 0.00004381840769  |
| 37 h | -0.00003343515353 | 0.00003874404896  | -0.00006554780172 |
| 38 h | -0.00000985602259 | 0.00001432877316  | -0.00001045229364 |
| 39 h | -0.00000319889637 | -0.00001766459193 | -0.00001636549731 |
| 40 h | 0.00001147046134  | -0.00001854173923 | -0.00002504751446 |
| 41 h | -0.00001895624397 | 0.00001234447085  | 0.00001350351188  |
| 42 h | -0.00000100509053 | -0.00000979304111 | -0.00001685674361 |
| 43 h | 0.00000226848127  | 0.00000332997268  | -0.00000222610495 |
| 44 h | -0.00000118649086 | -0.00000166802553 | -0.00000093032962 |
| 45 h | -0.00000631280862 | 0.00000295760374  | -0.00000416734274 |
| 46 h | 0.00001215520436  | 0.00000414801288  | 0.00004169540042  |
| 47 h | -0.00002076017001 | -0.00001406761857 | -0.00003852150287 |
| 48 h | 0.00000581947574  | 0.00000773020764  | 0.00001812968916  |
| 49 h | -0.00000800636226 | 0.00001812529360  | 0.00000396393050  |
| 50 h | 0.00000459920066  | -0.00002138734754 | 0.00000656614599  |
| 51 h | -0.00000020894871 | 0.00000986199469  | 0.00000060114282  |
| 52 h | 0.00002233220836  | 0.00004293903104  | 0.00002308191771  |
| 53 h | -0.00002075050197 | -0.00001364963630 | -0.00001139481230 |
| 54 h | 0.00000104990428  | 0.00000416027549  | -0.00000344614624 |
| 55 h | -0.00001844517234 | -0.00003322464975 | -0.00001353260876 |

56 h 0.00003708385485 0.00006915730633 0.00002322577020

\*\*\*\*\*

norm of actual CARTESIAN gradient: 3.71815E-04

norm of actual INTERNAL gradient: 1.09590E-03

ENERGY = -1397.5010685940 a.u.; # of cycle = 18

Approximate Hessian read from \$hessapprox data section

Hessian updated according to BFGS formula

Number of zero Hessian eigenvalues: 0

total energy = -1397.50106874115 |

-----  
: kinetic energy = 1383.33204973229 :  
: potential energy = -2780.83311847345 :  
: virial theorem = 1.98986117483 :  
: wavefunction norm = 0.99999999990 :  
.....

HOMO-LUMO Separation

HOMO : -0.19605636 H = -5.33497 eV

LUMO : -0.05909701 H = -1.60811 eV

HOMO-LUMO gap: 0.13695935 H = +3.72686 eV

For the compound **3db**, excited state: Cartesian coordinates and Cartesian gradients and Energy

\*\*\*\*\*

| ATOM | CARTESIAN COORDINATES |                   |                   |
|------|-----------------------|-------------------|-------------------|
| 1 c  | 0.87707409386944      | 2.96140463500044  | 1.26781852702738  |
| 2 c  | -0.33818785312003     | 0.70358427143613  | 0.67302794761082  |
| 3 c  | -2.75179087449879     | 0.22818271133522  | 1.78327572284145  |
| 4 c  | -3.91861864910169     | 2.05146752739641  | 3.36388429928279  |
| 5 c  | -2.65764548016303     | 4.27375003329448  | 3.92200080818259  |
| 6 c  | -0.25356927560985     | 4.71875094177837  | 2.88879566029564  |
| 7 n  | -3.91969263699598     | -2.09488662329961 | 1.35009522591608  |
| 8 c  | -2.44927798118060     | -4.22343653527798 | 0.75937677892130  |
| 9 c  | -0.05200822089036     | -3.83294190671000 | -0.39125684643220 |
| 10 c | 0.59641437273396      | -1.18778446044242 | -1.25818800604511 |
| 11 c | 3.21173943895513      | -0.81518740131424 | -2.41461167845292 |
| 12 o | 5.20817884610081      | -0.80731789307663 | -0.61382626787839 |
| 13 c | 6.86910317586630      | 1.10671543442903  | -1.33421457838564 |
| 14 c | 5.84849781431875      | 2.63400848139909  | -3.31216160409708 |
| 15 c | 3.44427714237315      | 1.64978401107957  | -3.99109181169696 |
| 16 o | 1.70943356902432      | 2.33617937023217  | -5.45305831053655 |
| 17 c | 7.29104496800247      | 4.75212817143626  | -4.16073656162278 |
| 18 c | 9.63414467135959      | 5.19133254598921  | -3.06178533156848 |
| 19 c | 10.62753351764520     | 3.64541795119068  | -1.12873376539797 |
| 20 c | 9.19509570836086      | 1.54493375422764  | -0.23316623122614 |
| 21 o | 9.95717076016504      | -0.05348829913212 | 1.67005755485935  |
| 22 c | 12.32341746134694     | 0.35378127474443  | 2.78444643454065  |
| 23 c | 1.51107118814143      | -5.92533776408164 | -0.75022208225750 |
| 24 c | 0.72132296757303      | -8.35458510912140 | -0.06839949488305 |

|      |                    |                    |                   |
|------|--------------------|--------------------|-------------------|
| 25 c | -1.67097424081677  | -8.73594957225841  | 0.99888860279596  |
| 26 c | -3.25279184405349  | -6.68569821880180  | 1.42400629141221  |
| 27 c | -6.66988196889045  | -2.35028154205541  | 1.73391707285197  |
| 28 c | -8.24364618513925  | -0.52939146741926  | 0.16532716097524  |
| 29 c | -7.62161491859384  | 0.01026998611616   | -2.35415492094981 |
| 30 c | -9.16420418209830  | 1.59180430999759   | -3.79923418640201 |
| 31 c | -11.35502222757973 | 2.63323515452727   | -2.75000732748083 |
| 32 c | -11.99315260508081 | 2.09284575636398   | -0.24487910273355 |
| 33 c | -10.43909330729220 | 0.52557720939609   | 1.20753181758492  |
| 34 h | 2.70586801341529   | 3.38276420938805   | 0.43822036221753  |
| 35 h | -5.76963542544100  | 1.70027320304775   | 4.18710432543791  |
| 36 h | -3.53213255227132  | 5.66412944228658   | 5.17102261808606  |
| 37 h | 0.74856883820070   | 6.46740178022173   | 3.33276394768214  |
| 38 h | -0.63318432548293  | -0.80268446540636  | -2.93128847438066 |
| 39 h | 3.50031397055031   | -2.40559504643747  | -3.75460737699223 |
| 40 h | 6.55391967429889   | 5.96515748139751   | -5.65770035751908 |
| 41 h | 10.77231103228209  | 6.79216366601551   | -3.71234435323091 |
| 42 h | 12.48027572784776  | 4.06467849543564   | -0.33795505104647 |
| 43 h | 13.89289101834223  | 0.19310839189669   | 1.40994262163697  |
| 44 h | 12.56620113311083  | -1.11494159237182  | 4.23646039640081  |
| 45 h | 12.46286097146755  | 2.22736725827021   | 3.70617601571615  |
| 46 h | 3.38770674128597   | -5.65199755788139  | -1.54724741437800 |
| 47 h | 1.98918315135980   | -9.95728768758702  | -0.35962603145980 |
| 48 h | -2.28392774681180  | -10.62917457736354 | 1.54508318868033  |
| 49 h | -5.05989595629431  | -6.99582878770771  | 2.35921230521462  |
| 50 h | -7.17702426874063  | -4.28415558591759  | 1.19960321929978  |
| 51 h | -7.11757203078905  | -2.14790739174652  | 3.75759823256490  |
| 52 h | -5.91551608458011  | -0.78730774158091  | -3.20274797558500 |

|      |                    |                  |                   |
|------|--------------------|------------------|-------------------|
| 53 h | -8.64433355775068  | 2.01238080191236 | -5.75258921439808 |
| 54 h | -12.55871946382570 | 3.87100325945639 | -3.88309109365370 |
| 55 h | -13.69845629006894 | 2.90428788679280 | 0.59129115078790  |
| 56 h | -10.94404981551056 | 0.12329781943939 | 3.17258116679106  |

\*\*\*\*\*

| ATOM | CARTESIAN GRADIENTS |                   |                   |
|------|---------------------|-------------------|-------------------|
| 1 c  | 0.00001174313700    | -0.00001318477271 | 0.00002212659271  |
| 2 c  | -0.00002101740306   | 0.00003394009492  | -0.00002898313974 |
| 3 c  | -0.00005330769561   | -0.00001810839274 | -0.00003330868944 |
| 4 c  | 0.00001288140909    | 0.00003114885079  | 0.00002274527785  |
| 5 c  | -0.00001431684465   | -0.00000718241365 | -0.00000012589642 |
| 6 c  | 0.00000050214264    | -0.00000039014806 | 0.00000467710879  |
| 7 n  | -0.00000330421170   | 0.00004317768265  | -0.00002772713126 |
| 8 c  | 0.00005063850757    | -0.00004795408862 | 0.00001793673763  |
| 9 c  | -0.00001867774363   | -0.00000415809238 | -0.00002093079142 |
| 10 c | 0.00004406792936    | -0.00004683932188 | 0.00002080102301  |
| 11 c | -0.00003340925061   | 0.00010219065454  | -0.00006328956107 |
| 12 o | 0.00001793821195    | -0.00005105513600 | -0.00000102656043 |
| 13 c | -0.00000479738943   | 0.00002656283494  | 0.00002694393867  |
| 14 c | -0.00002805874514   | 0.00002403793974  | 0.00002962261763  |
| 15 c | 0.00002301965277    | -0.00003685160755 | -0.00001834150424 |
| 16 o | 0.00001242288824    | 0.00001185073244  | 0.00001659743058  |
| 17 c | 0.00000129738298    | 0.00000198565394  | 0.00000464176928  |
| 18 c | -0.00000057608749   | -0.00000463285371 | -0.00000058404699 |
| 19 c | 0.00001961937708    | -0.00001431913059 | -0.00002531314428 |
| 20 c | -0.00003229218395   | 0.00004524071077  | 0.00003988833319  |
| 21 o | 0.00005515758664    | -0.00007557588167 | -0.00007441530520 |
| 22 c | -0.00003786228080   | 0.00004444529469  | 0.00004482103886  |

|      |                   |                   |                   |
|------|-------------------|-------------------|-------------------|
| 23 c | -0.00000432419969 | -0.00002890906821 | -0.00000145249971 |
| 24 c | -0.00001031069650 | 0.00000555374286  | -0.00000012497716 |
| 25 c | 0.00000781012930  | -0.00000195527393 | -0.00000575326673 |
| 26 c | -0.00000351239065 | 0.00001005666508  | 0.00000300973920  |
| 27 c | -0.00000089512616 | -0.00000915382909 | 0.00001912071205  |
| 28 c | -0.00000608713301 | -0.00002343095042 | -0.00002472216866 |
| 29 c | 0.00000957784281  | 0.00002032331652  | 0.00001171289684  |
| 30 c | -0.00001939668330 | -0.00001852868595 | -0.00000879685304 |
| 31 c | 0.00002656807103  | 0.00003321732498  | 0.00001281412373  |
| 32 c | -0.00001846421768 | -0.00003001411131 | -0.00000766750218 |
| 33 c | -0.00000011687063 | 0.00000594161323  | 0.00000416106888  |
| 34 h | -0.00000099121599 | -0.00000274943465 | 0.00000621573445  |
| 35 h | 0.00000860412545  | -0.00001125510759 | 0.00000575657945  |
| 36 h | 0.00000148812264  | 0.00000201108689  | -0.00000098007432 |
| 37 h | -0.00000967367804 | 0.00000657014370  | -0.00001083103466 |
| 38 h | -0.00001246707370 | 0.00000725174009  | 0.00002989416976  |
| 39 h | -0.00001205600321 | 0.00000655404455  | 0.00000676588906  |
| 40 h | -0.00000643355400 | 0.00000711950674  | 0.00000848652822  |
| 41 h | 0.00000227567512  | -0.00000107626771 | 0.00000121664645  |
| 42 h | 0.00000304213839  | -0.00000603029462 | -0.00000407158487 |
| 43 h | 0.00000186804905  | -0.00001363182137 | 0.00000727612638  |
| 44 h | -0.00000271807476 | 0.00000381215000  | 0.00000717194171  |
| 45 h | 0.00000347238382  | 0.00000702167656  | -0.00001202318248 |
| 46 h | -0.00000123449911 | 0.00000119505928  | 0.00002099123387  |
| 47 h | 0.00000142494343  | -0.00000103005288 | 0.00000077846000  |
| 48 h | -0.00000304819980 | -0.00000255792726 | -0.00001529268694 |
| 49 h | -0.00000607869531 | 0.00000404402754  | -0.00000921384961 |
| 50 h | 0.00000309500643  | -0.00000310497031 | -0.00000459312248 |



|      |                   |                   |                   |
|------|-------------------|-------------------|-------------------|
| 51 h | -0.00000307062628 | -0.00000211373153 | -0.00000610808303 |
| 52 h | 0.00000629870896  | 0.00000751386106  | 0.00000263340573  |
| 53 h | -0.00000070490215 | -0.00000176598882 | -0.00000183833699 |
| 54 h | -0.00000065513223 | 0.00000061185769  | 0.00000023697461  |
| 55 h | -0.00000375703230 | -0.00000372528444 | -0.00000334298472 |
| 56 h | 0.00000134541223  | 0.00000525211575  | -0.00000018628269 |

\*\*\*\*\*

norm of actual CARTESIAN gradient: 2.90985E-04

norm of actual INTERNAL gradient: 5.43275E-04

ENERGY = -1397.3987945012 a.u.; # of cycle = 17

Approximate Hessian read from \$hessapprox data section

Hessian updated according to BFGS formula

Number of zero Hessian eigenvalues: 0

**total energy** = -1397.48605798372 |

-----

: kinetic energy = 1383.10626423579 :

: potential energy = -2780.59232221950 :

: virial theorem = 1.98971024171 :

: wavefunction norm = 1.000000000000 :

.....

**HOMO-LUMO Separation**

HOMO : -0.18357077 H = -4.99522 eV

LUMO : -0.07717207 H = -2.09996 eV

HOMO-LUMO gap: 0.10639869 H = +2.89526 eV

**SUMMARY OF EXCITATION ENERGIES AND DIPOLE OSCILLATOR STRENGTHS  
(velocity/length):**

-----  
| Exc. | energy (Eh) | energy (eV) | energy (cm-1) | energy (nm) | Osc.(vel) | Osc.(len) |

-----  
| 1 a | 0.087265 | 2.37459 | 19152.386 | 522.128 | 0.00322 | 0.00287 |

| 2 a | 0.122237 | 3.32624 | 26827.959 | 372.745 | 0.00387 | 0.00343 |

| 3 a | 0.135470 | 3.68634 | 29732.299 | 336.335 | 0.05561 | 0.05526 |

| 4 a | 0.139703 | 3.80152 | 30661.297 | 326.144 | 0.00921 | 0.00898 |

| 5 a | 0.142010 | 3.86428 | 31167.512 | 320.847 | 0.00148 | 0.00164 |

## References:

- 1) Á. Pintér, A. Sud, D. Sureshkumar, M. Klussmann, *Angew. Chem., Int. Ed.* 2010, **49**, 5004-5007.
- 2) A. Joshi-Pangu, F. Lévesque, H. G. Roth, S. F. Oliver, L.-C. Campeau, D. Nicewicz, D. A. DiRocco, *J. Org. Chem.* 2016, **81**, 7244-7249.
- 3) D. S. Harmalkar, G. Santosh, S. B. Shetgaonkar, M. Sankaralingam, S. N. Dhuri, *New J. Chem.* 2019, **43**, 12900-12906.
- 4) J. Qi, H. Tang, C. Chen, S. Cui, G. Xu, *Org. Chem. Front.* 2019, **6**, 2760-2764.
- 5) L. C. King, G. K. Ostrum, *J. Org. Chem.* 1964, **29**, 3459-3461.
- 6) H. Kubo, T. Hirose, K. Matsuda, *Org. Lett.* 2017, **19**, 1776-1779.
- 7) (a) K.-J. Jiao, Y.-K. Xing, Q.-L. Yang, H. Qiu, and T.-S. Mei, *Acc. Chem. Res.* 2020, **53**, 300-310. (b) M. D. Kärkäs, *Chem. Soc. Rev.* 2018, **47**, 5786-5865. (c) C. Kingston, M. D. Palkowitz, Y. Takahira, J. C. Vantourout, B. K. Peters, Y. Kawamata, and P. S. Baran, *Acc. Chem. Res.* 2020, **53**, 72-83. (d) S.-H. Shi, Y. Liang and N. Jiao, *Chem. Soc. Rev.* 2021, **121**, 485-505. (e) K. Yamamoto, M. Kuriyama and O. Onomura, *Acc. Chem. Res.* 2020, **53**, 105-120. (f) M. Yan, Y. Kawamata and P. S. Baran, *Chem. Soc. Rev.* 2017, **117**, 13230-13319.
- 8) (a) A. K. Bagdi, M. Rahman, D. Bhattacharjee, G. V. Zyryanov, S. Ghosh, O. N. Chupakhin and A. Hajra, *Green Chem.* 2020, **22**, 6632-6681. (b) C.-J. Li, *Acc. Chem. Res.* 2009, **42**, 335-344. (c) C.-J. Li, and Z. Li, *Pure Appl. Chem.* 2006, **78**, 935-945. (d) T. Tian, Z. Li, and C.-J. Li, *Green Chem.* 2021, **23**, 6789-6862.
- 9) (a) M. de M. Silva, T. S. Macedo, H. M. P. Teixeira, D. R. M. Moreira, M. B. P. Soares, A. L. da C. Pereira, V. de L. Serafim, F. J. B. Mendonça-Júnior, M. do Carmo A. de Lima, R. O. de Moura, E. F. da Silva-Júnior, J. X. de Araújo-Júnior, M. D. de A. Dantas, O. O. de E. Nascimento, T. M. S. Maciel, T. M. de Aquino, I. M. Figueiredo, J. C. C. Santos, *J. Photochem. Photobiol. B Biol.* 2018, **189**, 165-175. (b) M. Gensicka-Kowalewska, G. Cholewiński, and K. Dzierzbicka, *RSC Adv.* 2017, **7**, 15776-15804. (c) K. K. K. Leung, and B. H. Shilton, *Biochemistry* 2015, **54**, 7438-7448. (d) X.-Y. Liu, Y.-Y. Ma, W. Zhang, B. Song, L. Ding, M.-K. Fung, and J. Fan, *Chem. - Eur. J.* 2018, **24**, 11755-11762. (e) A. A. Kulago, E. M. Mes, M. Klok, A. Meetsma, A. M. Brouwer, and B. L. Feringa, *J. Org. Chem.* 2010, **75**, 666-679.
- 10) (a) N. Hadj-esfandiari, L. Navidpour, H. Shadnia, M. Amini, N. Samadi, M. A. Faramarzi, A. J. B. Shafiee, and m. c. letters, *Bioorg. Med. Chem.* 2007, **17**, 6354-6363. (b) M. A. Qhobosheane, R. M. Beteck, B. Baratte, T. Robert, S. Ruchaud, S. Bach, and L. J. Legoabe, *Chem Biol Interact.* 2021, **343**, 109478. (c) A. S. Van Dyk, J. P. Petzer, A. Petzer, and L. J. Legoabe, *Drug Des Devel Ther.* 2015, **9**, 5479-5489.

# $^1\text{H}$ and $^{13}\text{C}$ NMR spectra of compounds:

## $^1\text{H}$ NMR of **3aa** (400 MHz, $\text{CDCl}_3$ ):

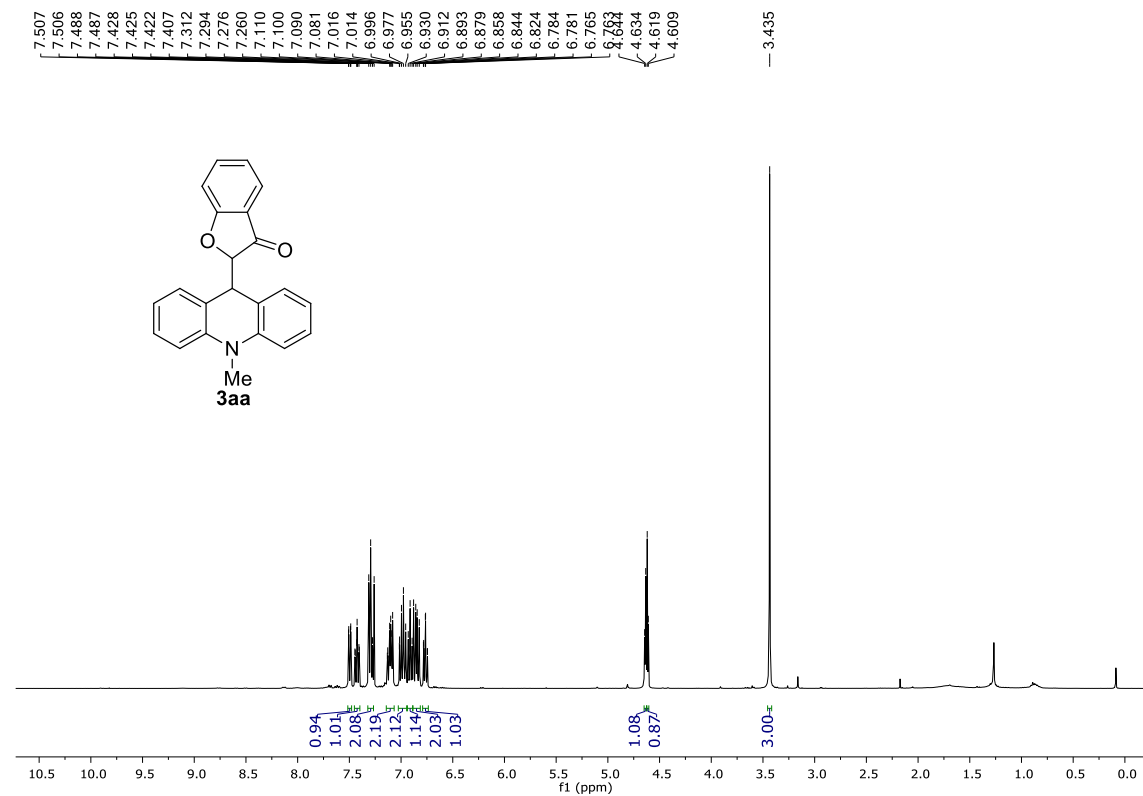

## $^{13}\text{C}$ $\{^1\text{H}\}$ NMR of **3aa** (100 MHz, $\text{CDCl}_3$ ):

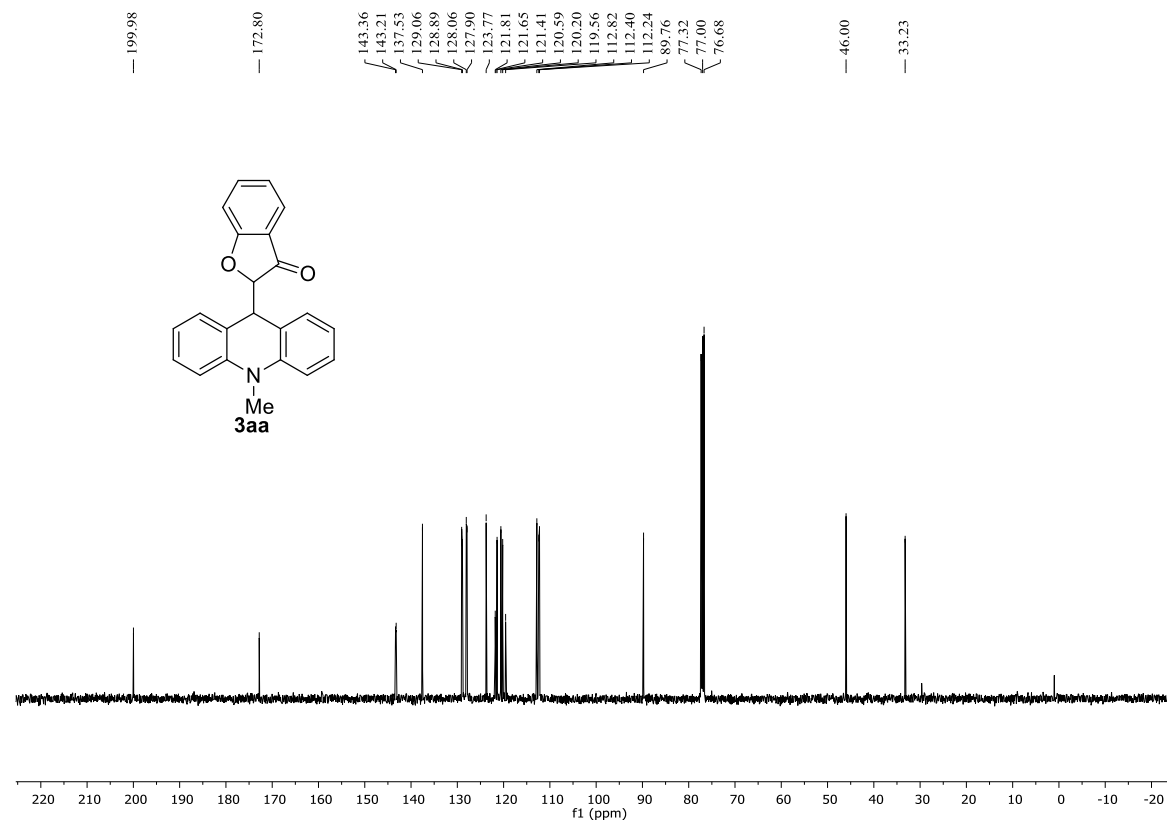

$^1\text{H}$  NMR of **3ab** (400 MHz,  $\text{CDCl}_3$ ):

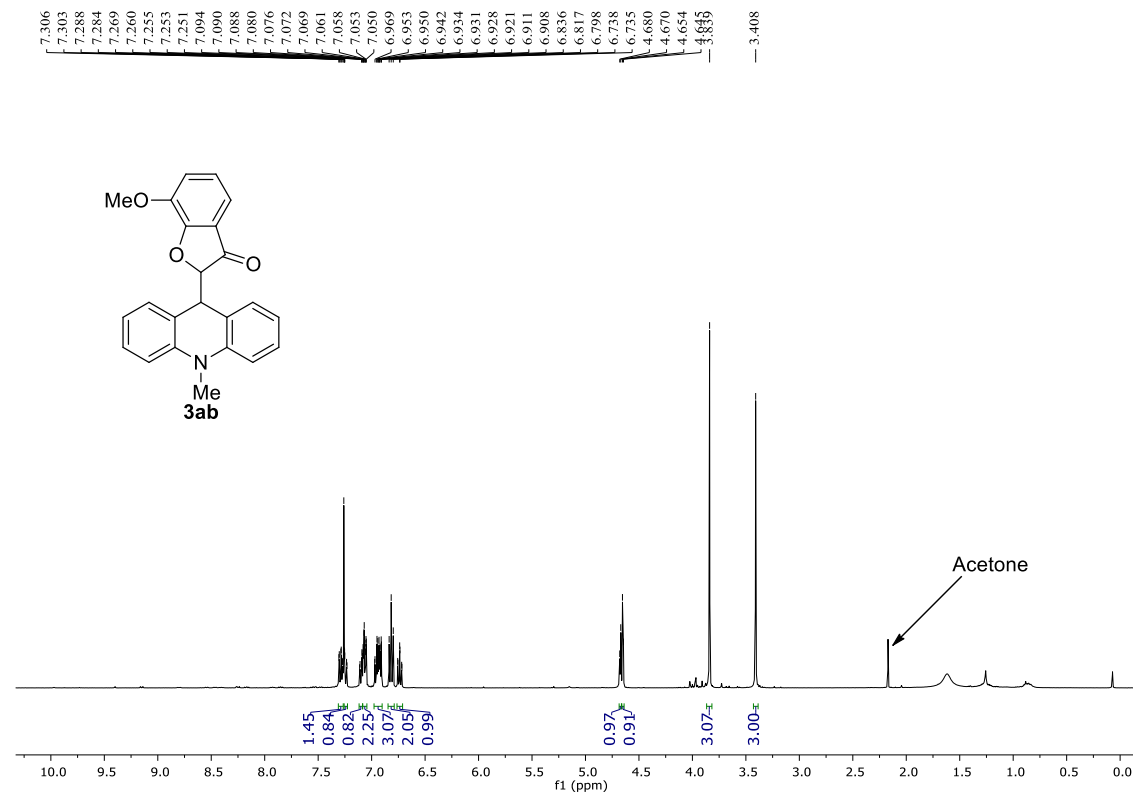

$^{13}\text{C}$   $\{^1\text{H}\}$  NMR of **3ab** (100 MHz,  $\text{CDCl}_3$ ):

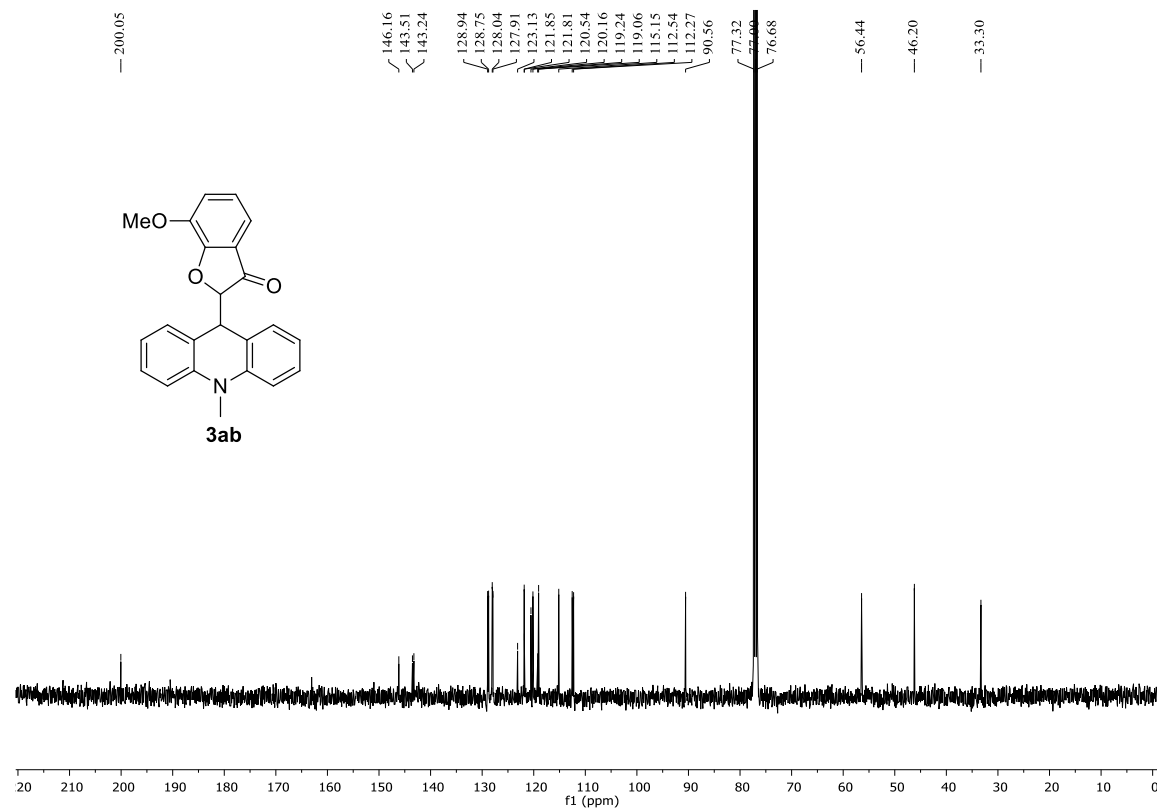

$^1\text{H}$  NMR of **3ac** (400 MHz,  $\text{CDCl}_3$ ):

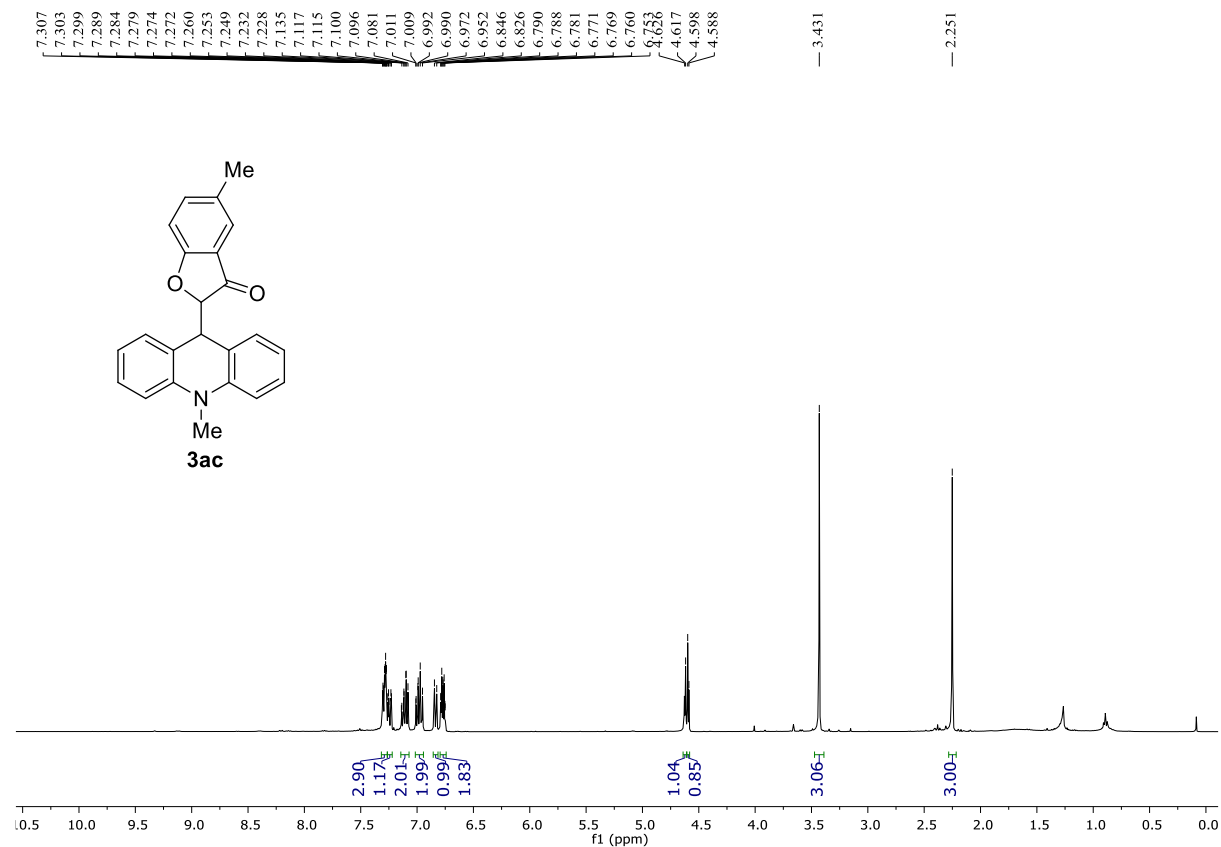

$^{13}\text{C}$  { $^1\text{H}$ } NMR of **3ac** (100 MHz,  $\text{CDCl}_3$ ):

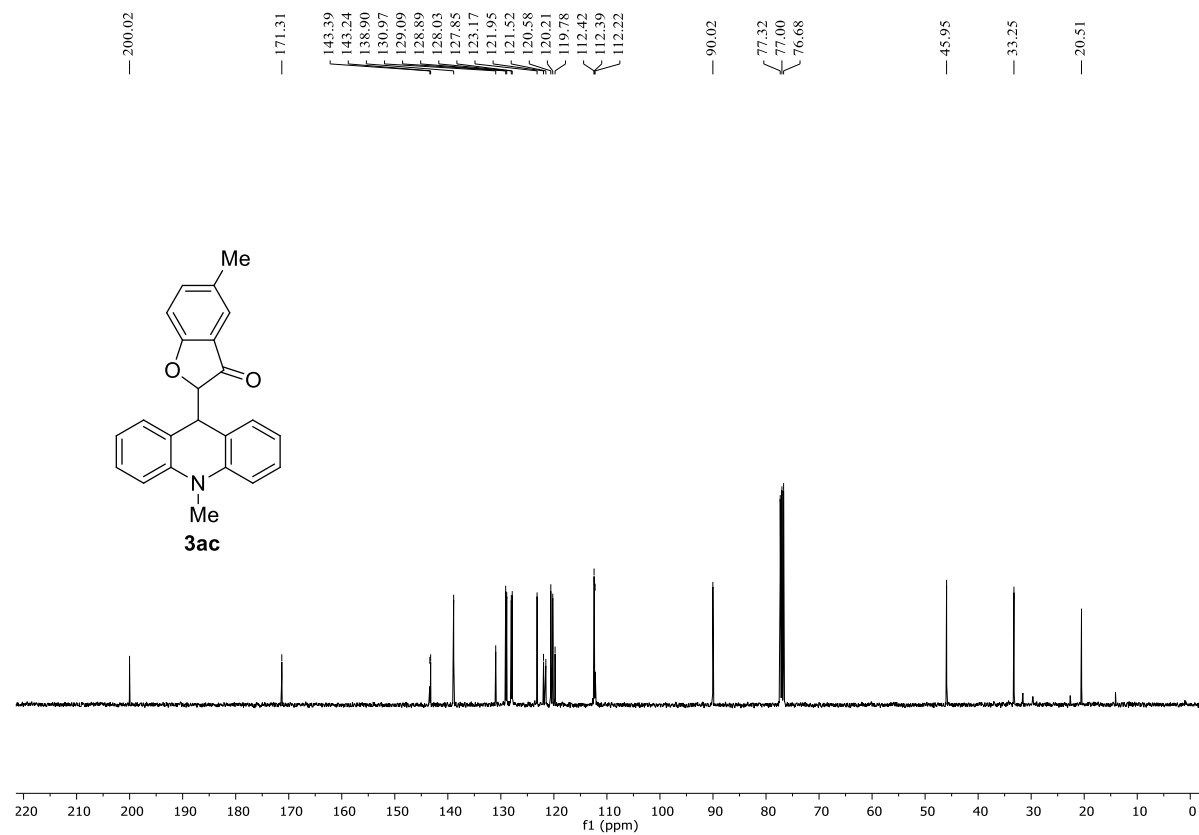

<sup>1</sup>H NMR of **3ad** (400 MHz, CDCl<sub>3</sub>):

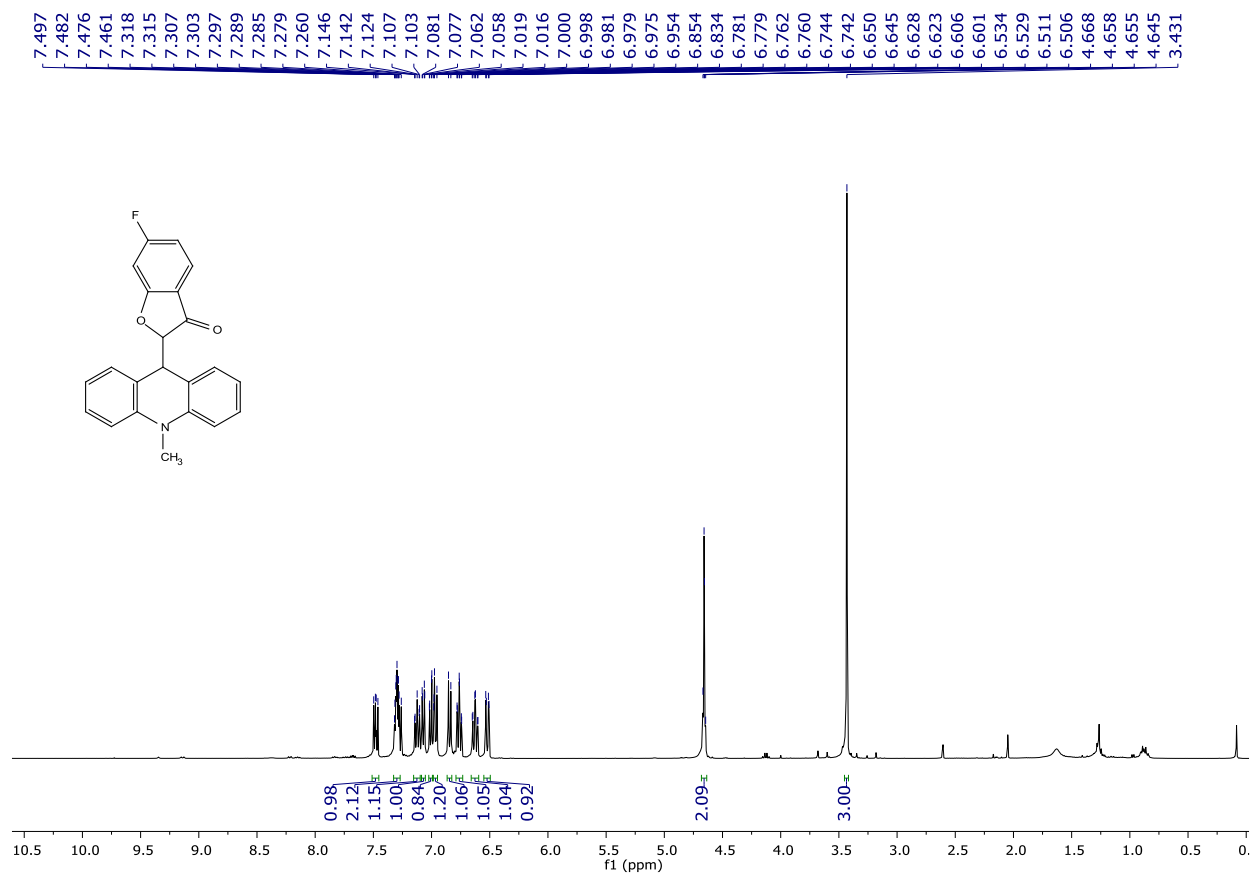

<sup>13</sup>C {<sup>1</sup>H} NMR of **3ad** (100 MHz, CDCl<sub>3</sub>):

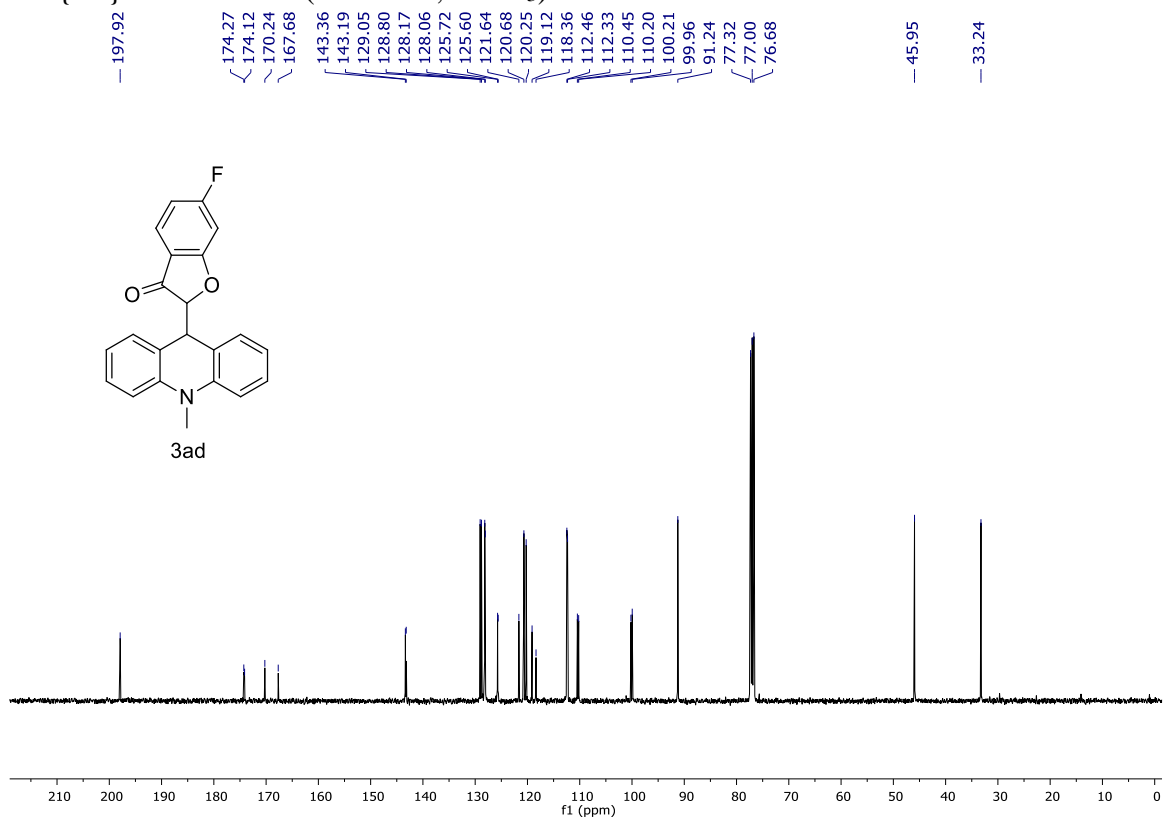

$^{19}\text{F}$  NMR of **3ad** (376 MHz,  $\text{CDCl}_3$ ):

— 97.412

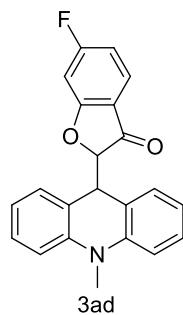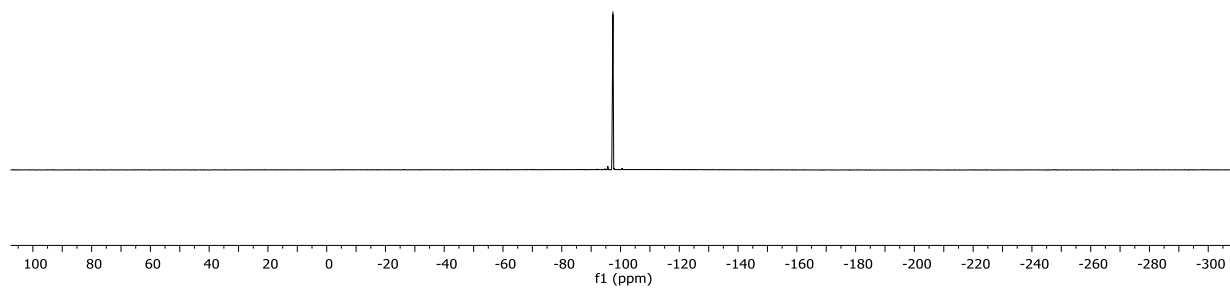



<sup>1</sup>H NMR of **3ba** (400 MHz, CDCl<sub>3</sub>):

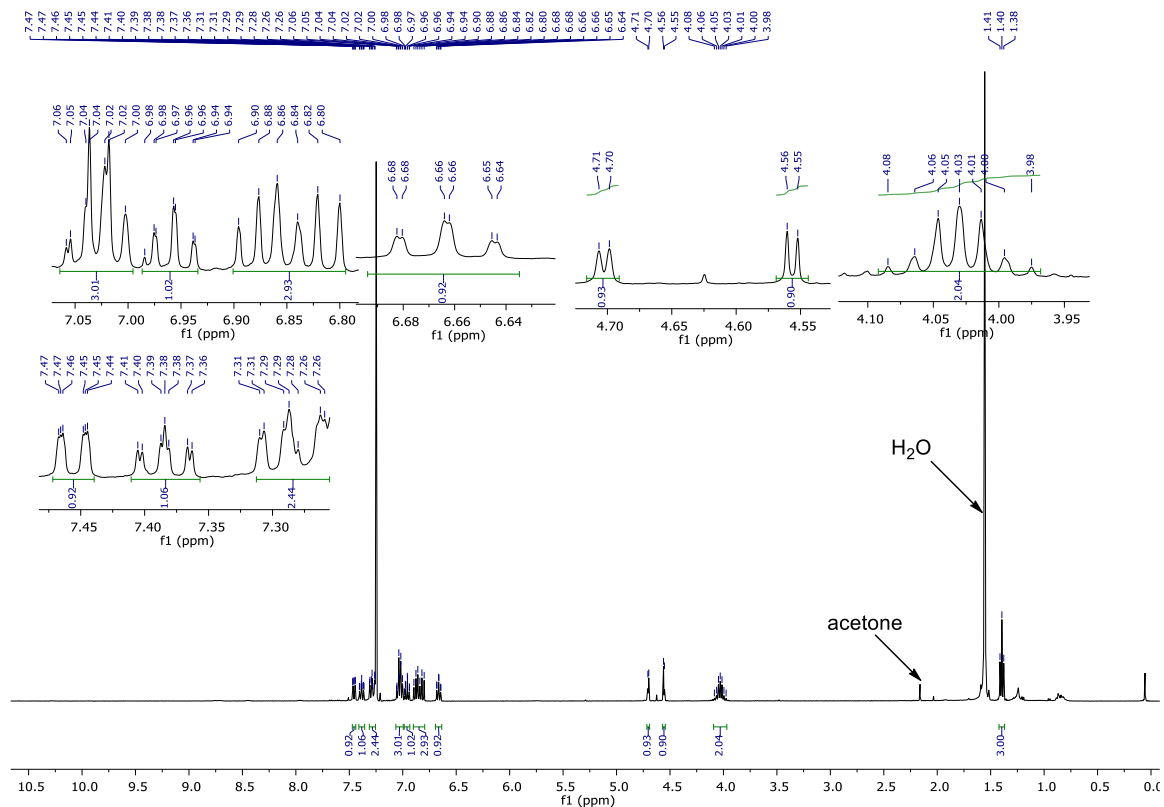

<sup>13</sup>C {<sup>1</sup>H} NMR of **3ba** (100 MHz, CDCl<sub>3</sub>):

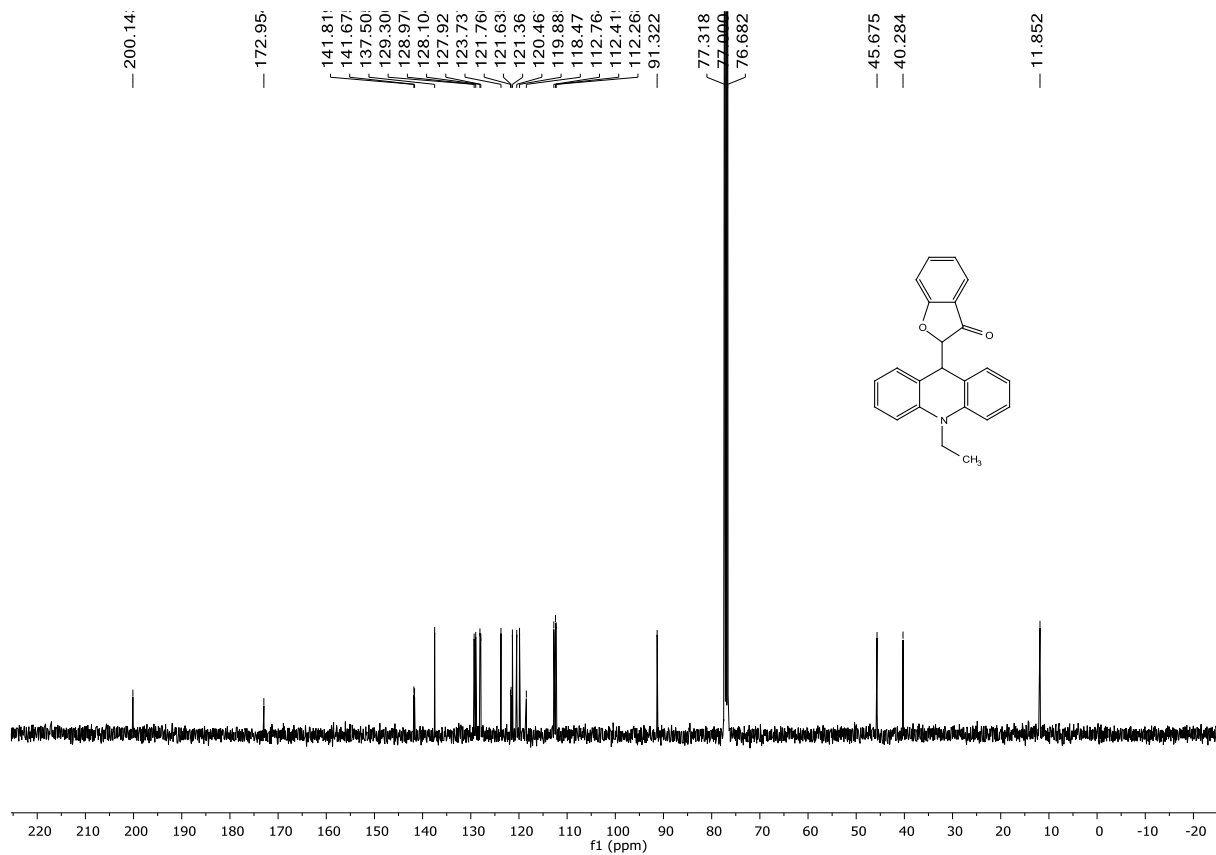

$^1\text{H}$  NMR of **3bb** (400 MHz,  $\text{CDCl}_3$ ):

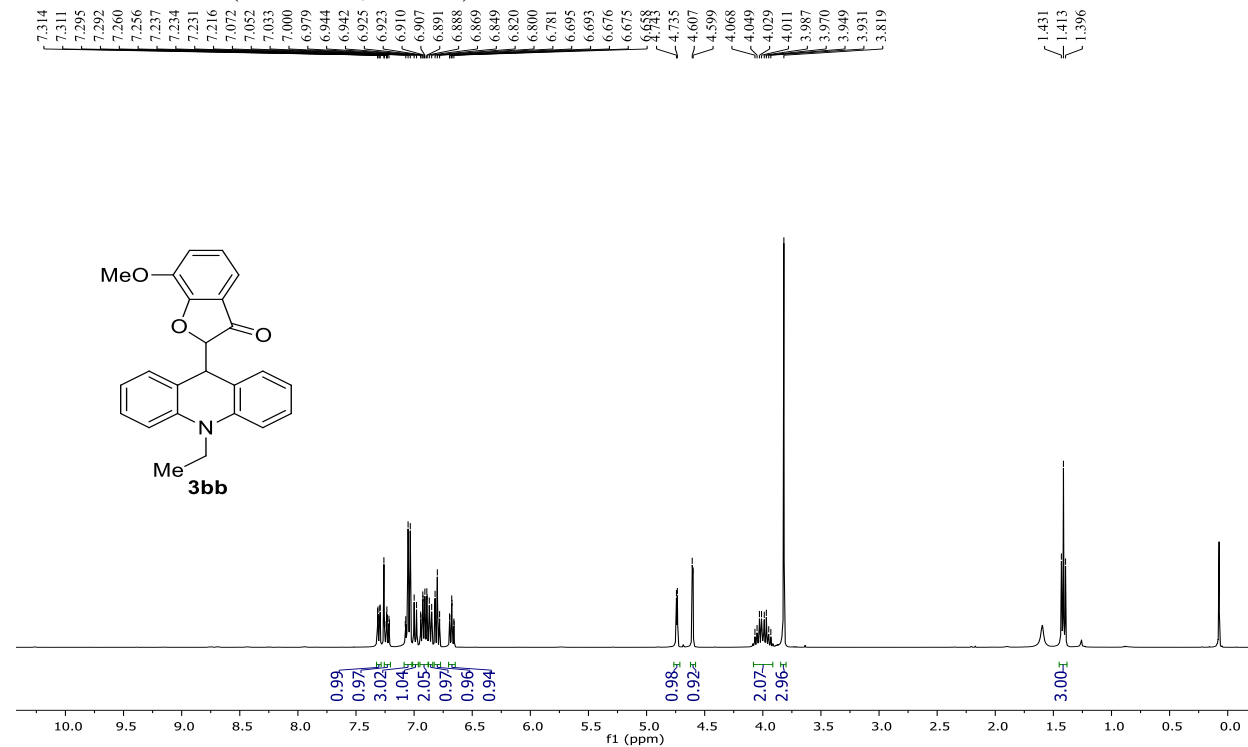

$^{13}\text{C}$  { $^1\text{H}$ } NMR of **3bb** (100 MHz,  $\text{CDCl}_3$ ):

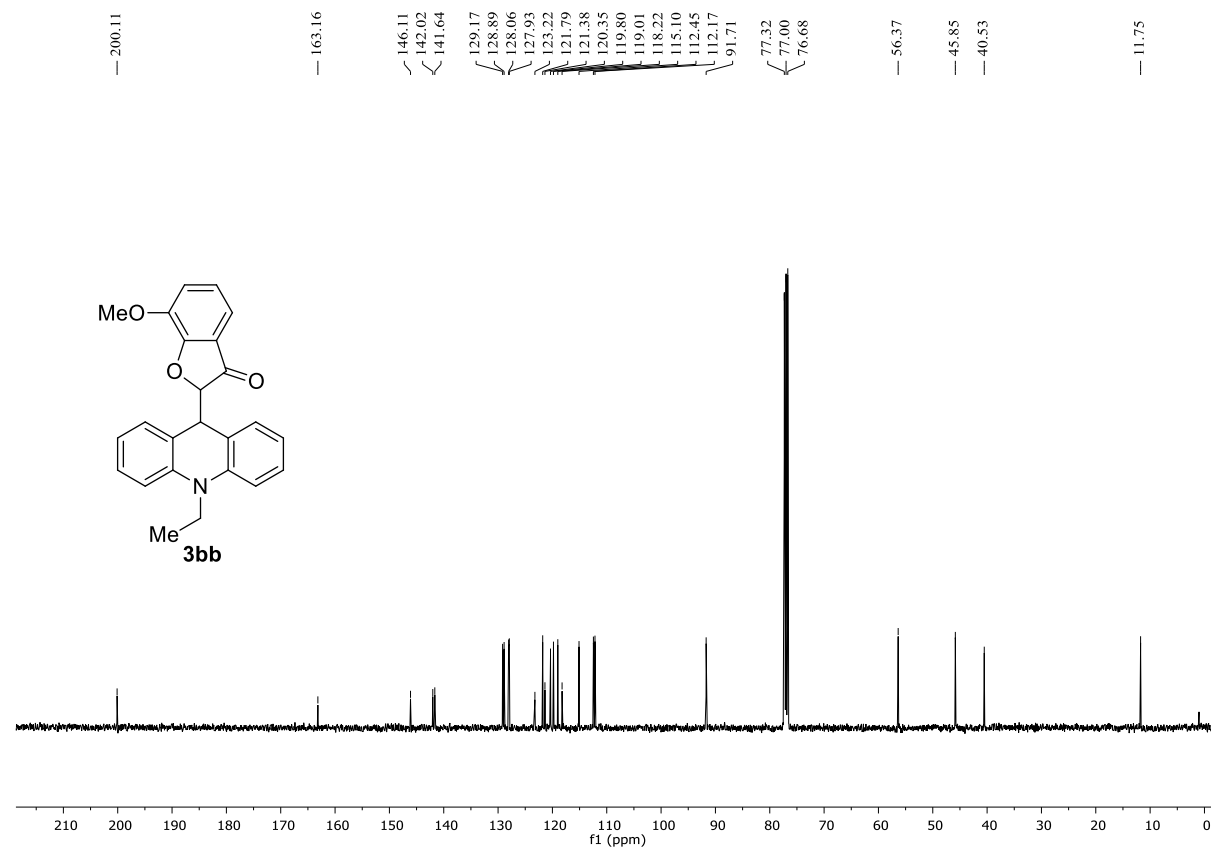



$^1\text{H}$  NMR of **3bd** (400 MHz,  $\text{CDCl}_3$ ):

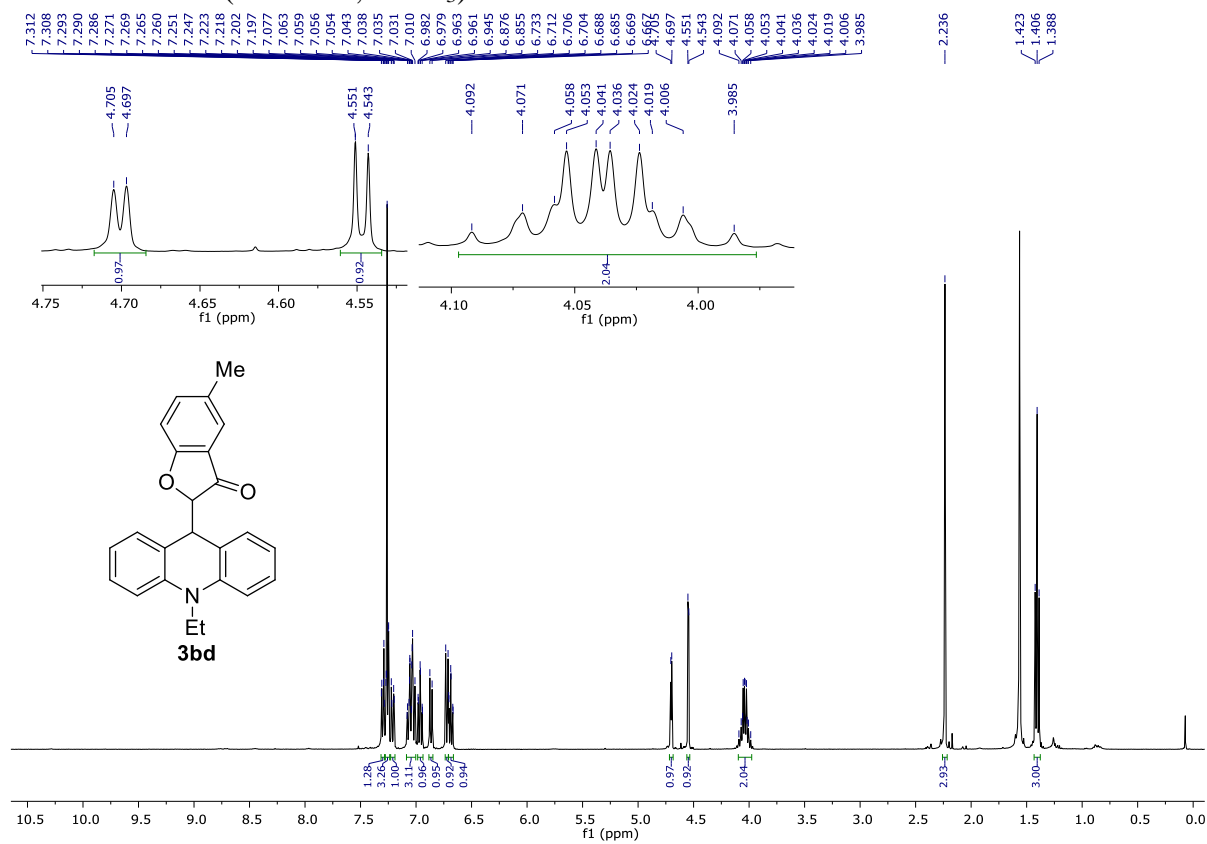

$^{13}\text{C}$   $\{^1\text{H}\}$  NMR of **3bd** (100 MHz,  $\text{CDCl}_3$ ):

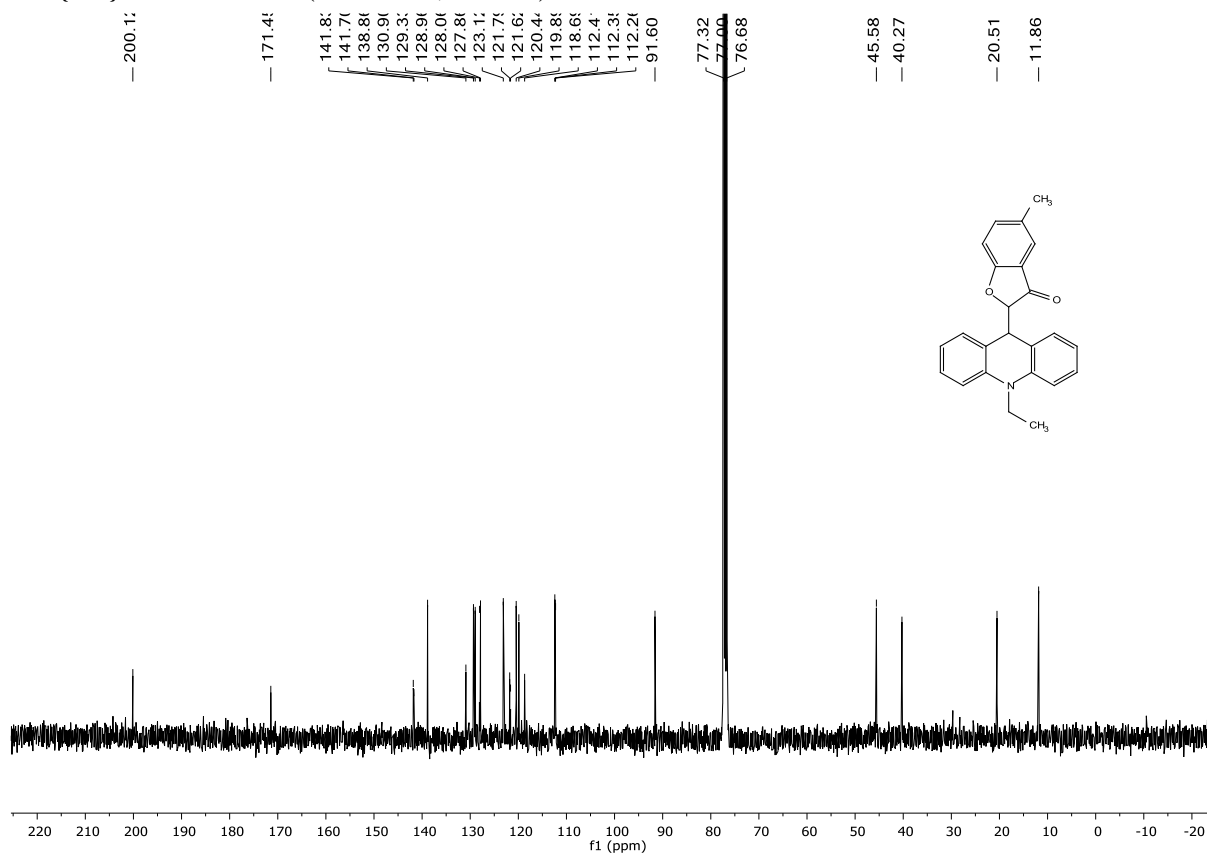

<sup>1</sup>H NMR of **3be** (400 MHz, CDCl<sub>3</sub>):

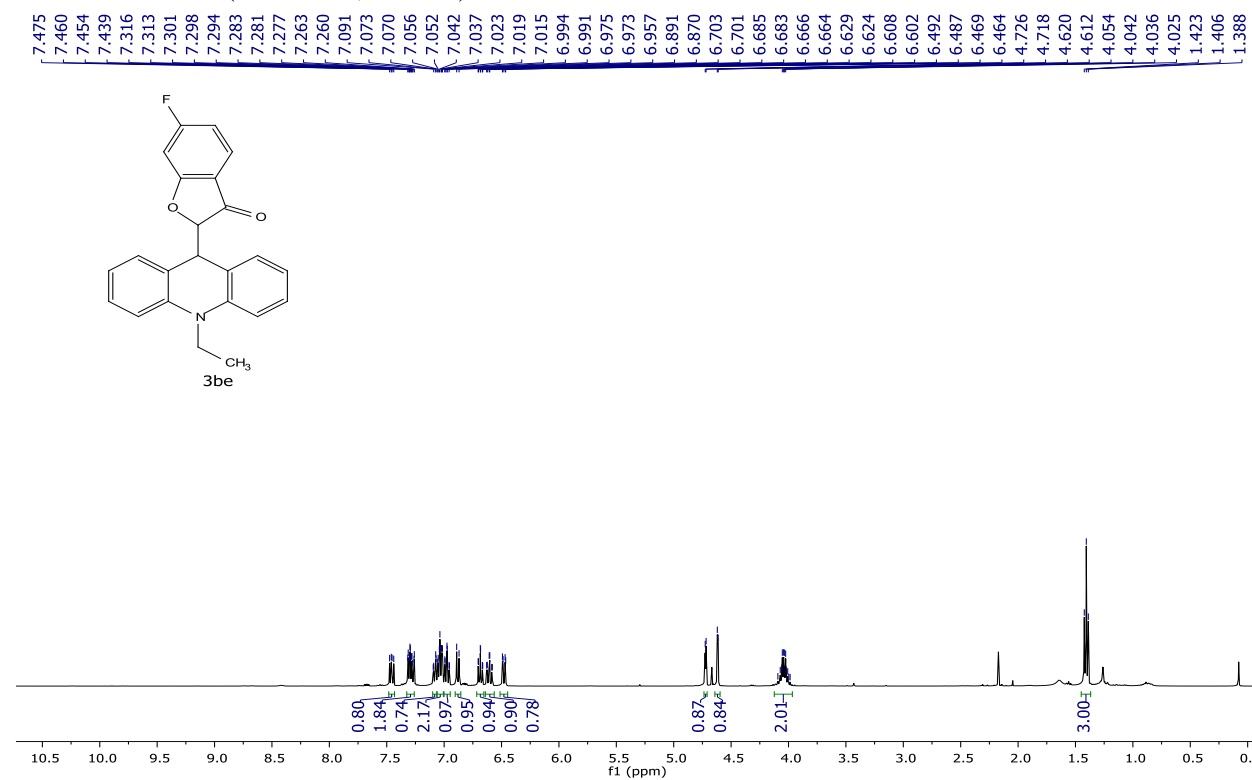

<sup>13</sup>C {<sup>1</sup>H} NMR of **3be** (100 MHz, CDCl<sub>3</sub>):

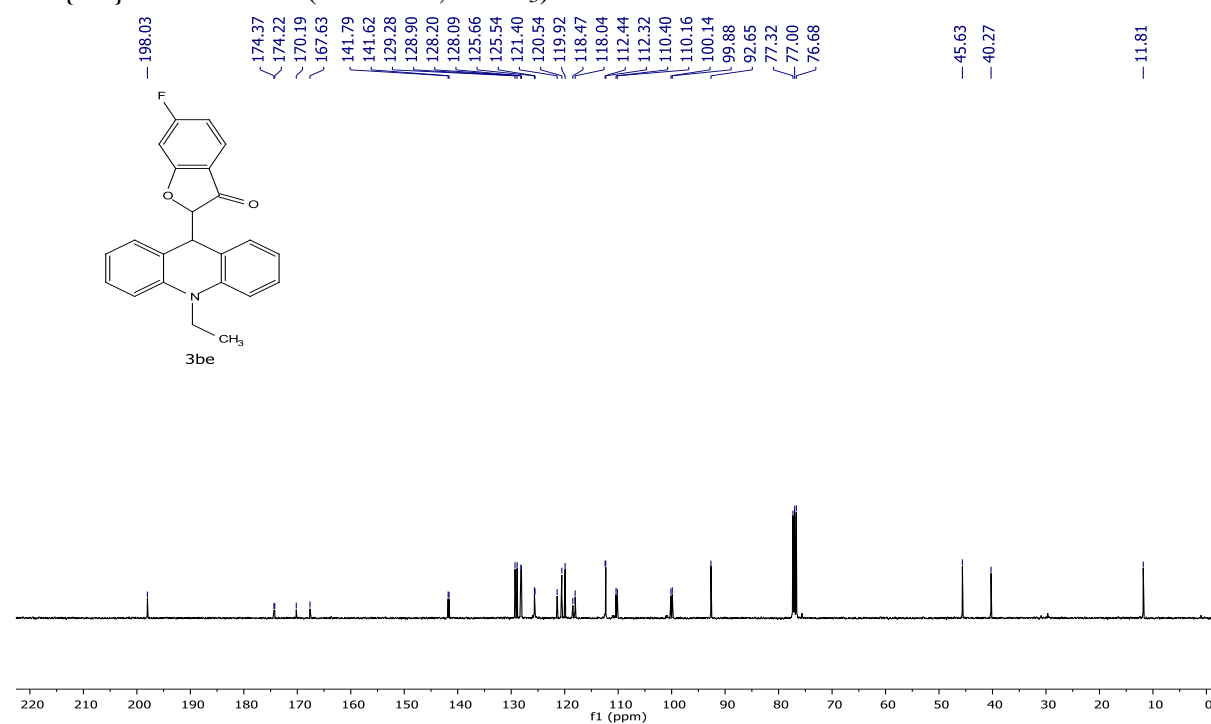

$^{19}\text{F}$  NMR of **3be** (376 MHz,  $\text{CDCl}_3$ ):

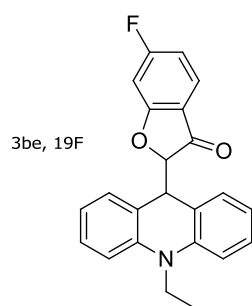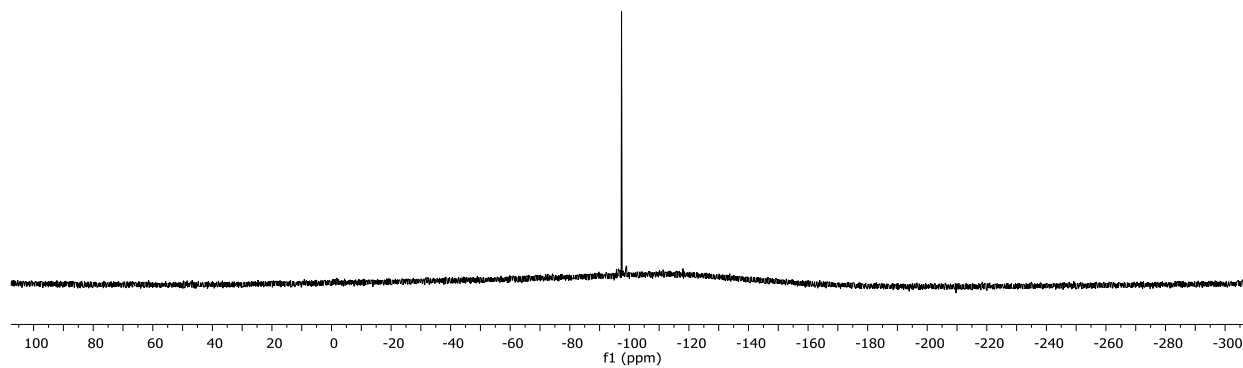

$^1\text{H}$  NMR of **3ca** (400 MHz,  $\text{CDCl}_3$ ):

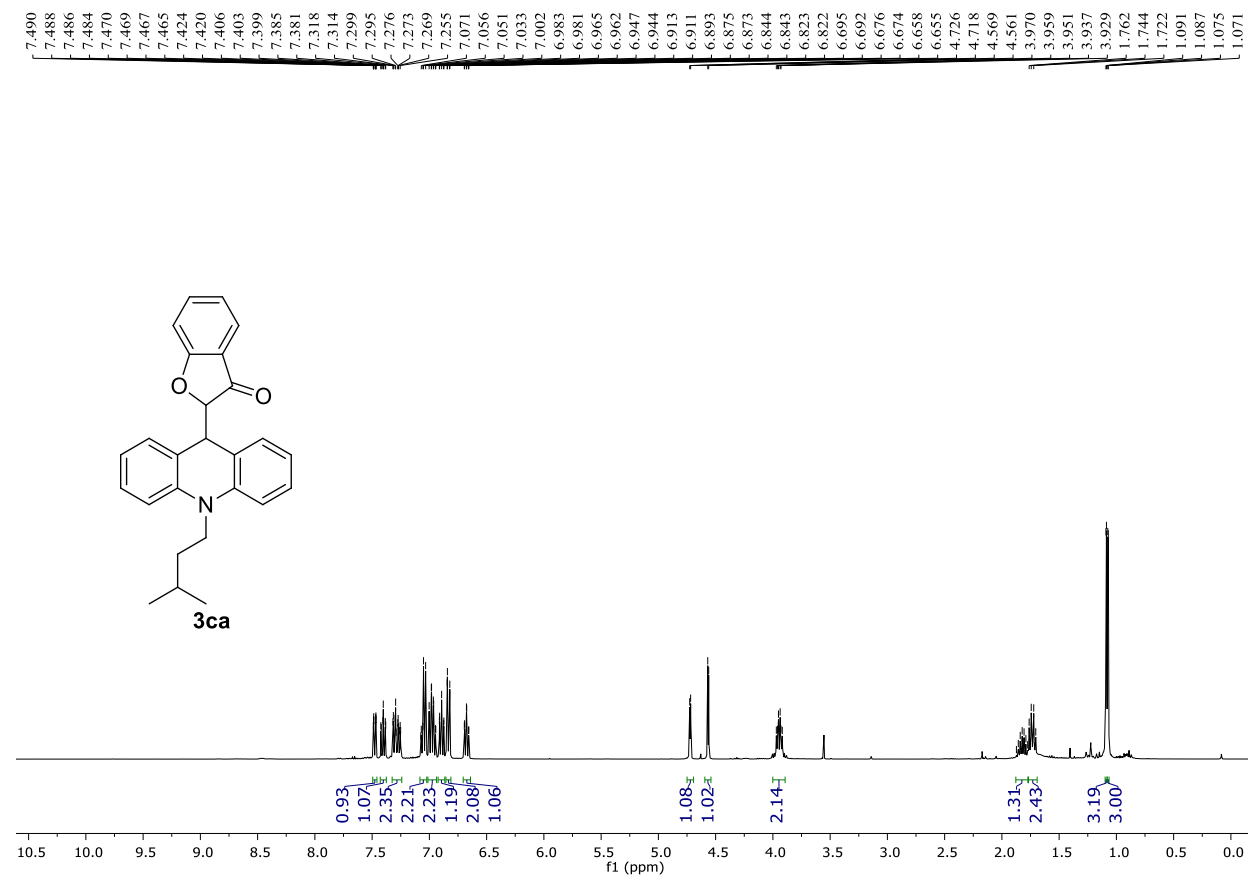

$^{13}\text{C}$   $\{^1\text{H}\}$  NMR of **3ca** (100 MHz,  $\text{CDCl}_3$ ):

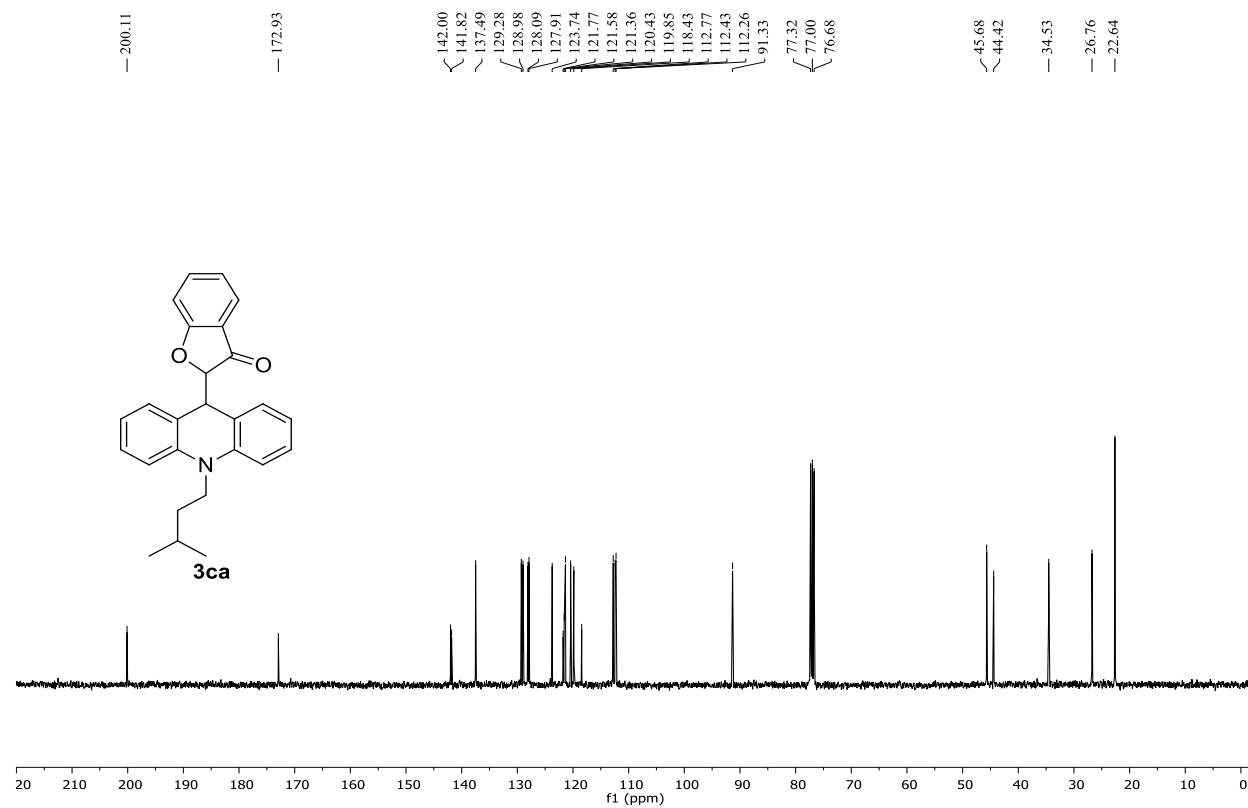

<sup>1</sup>H NMR of **3cb** (400 MHz, CDCl<sub>3</sub>):

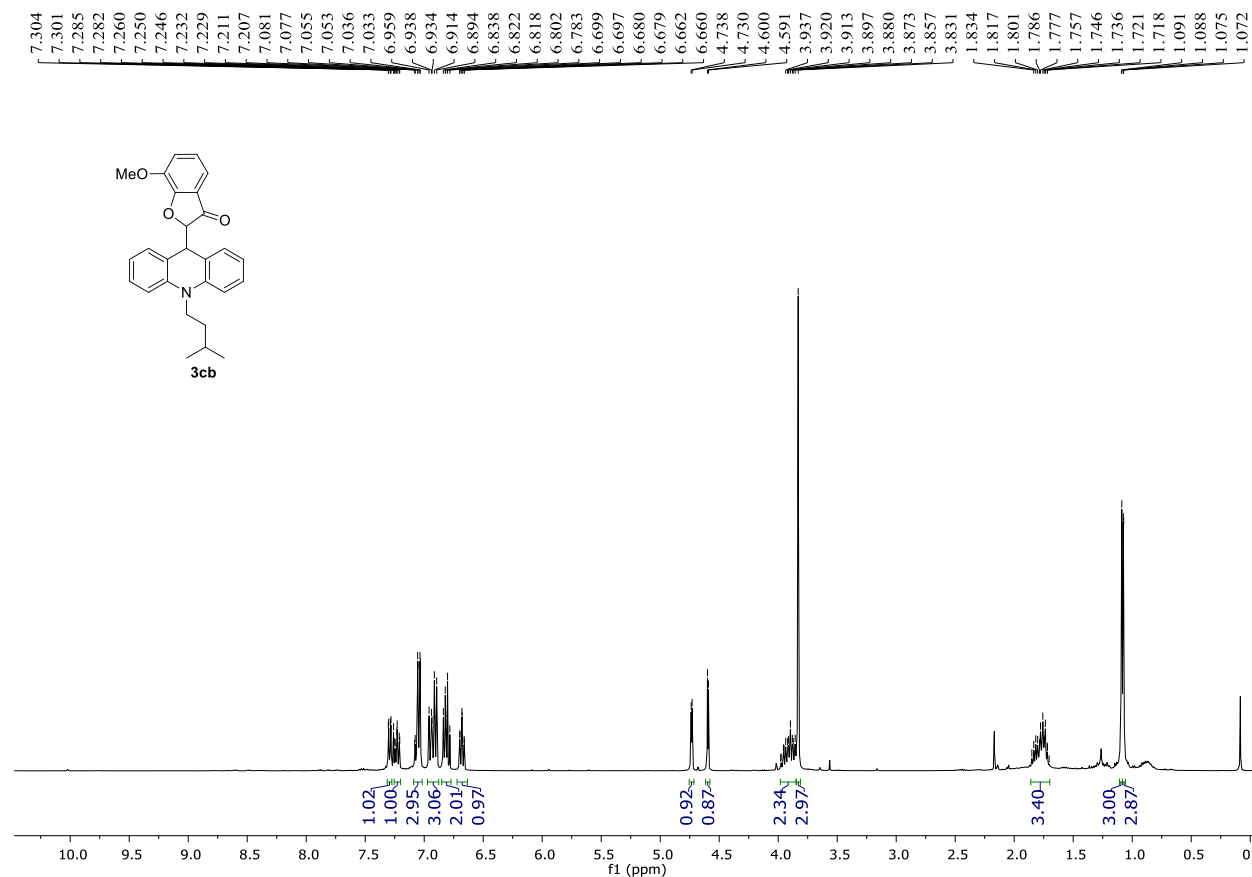

<sup>13</sup>C {<sup>1</sup>H} NMR of **3cb** (100 MHz, CDCl<sub>3</sub>):

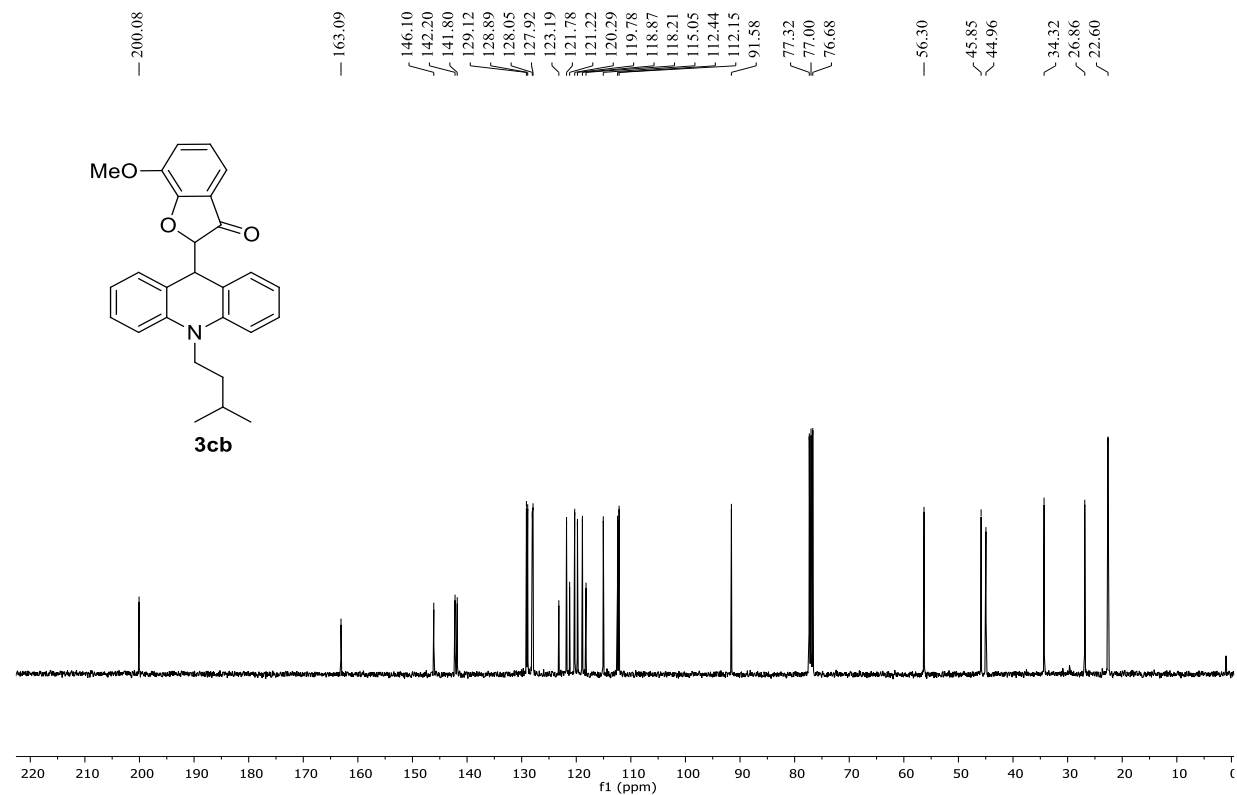



<sup>1</sup>H NMR of **3cc** (400 MHz, CDCl<sub>3</sub>):

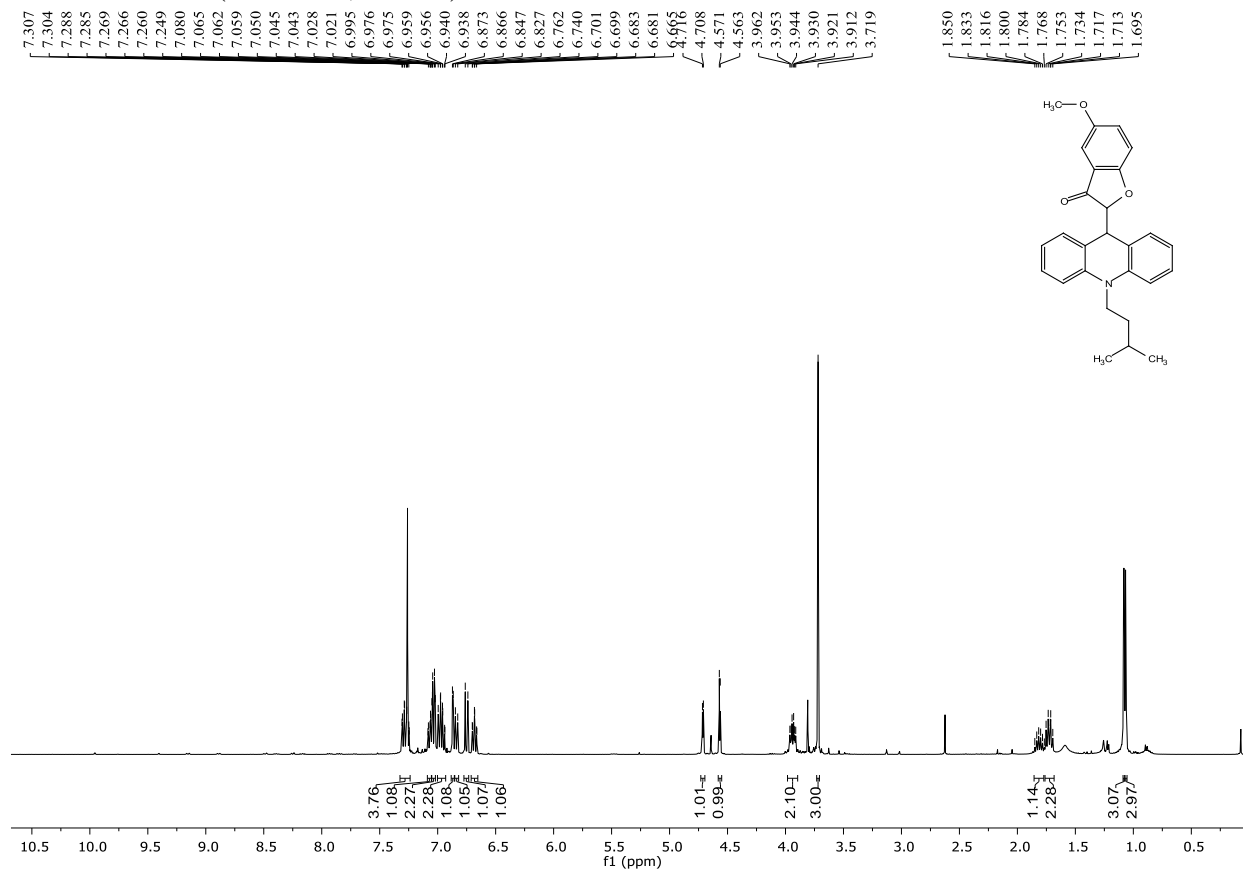

<sup>13</sup>C {<sup>1</sup>H} NMR of **3cc** (100 MHz, CDCl<sub>3</sub>):

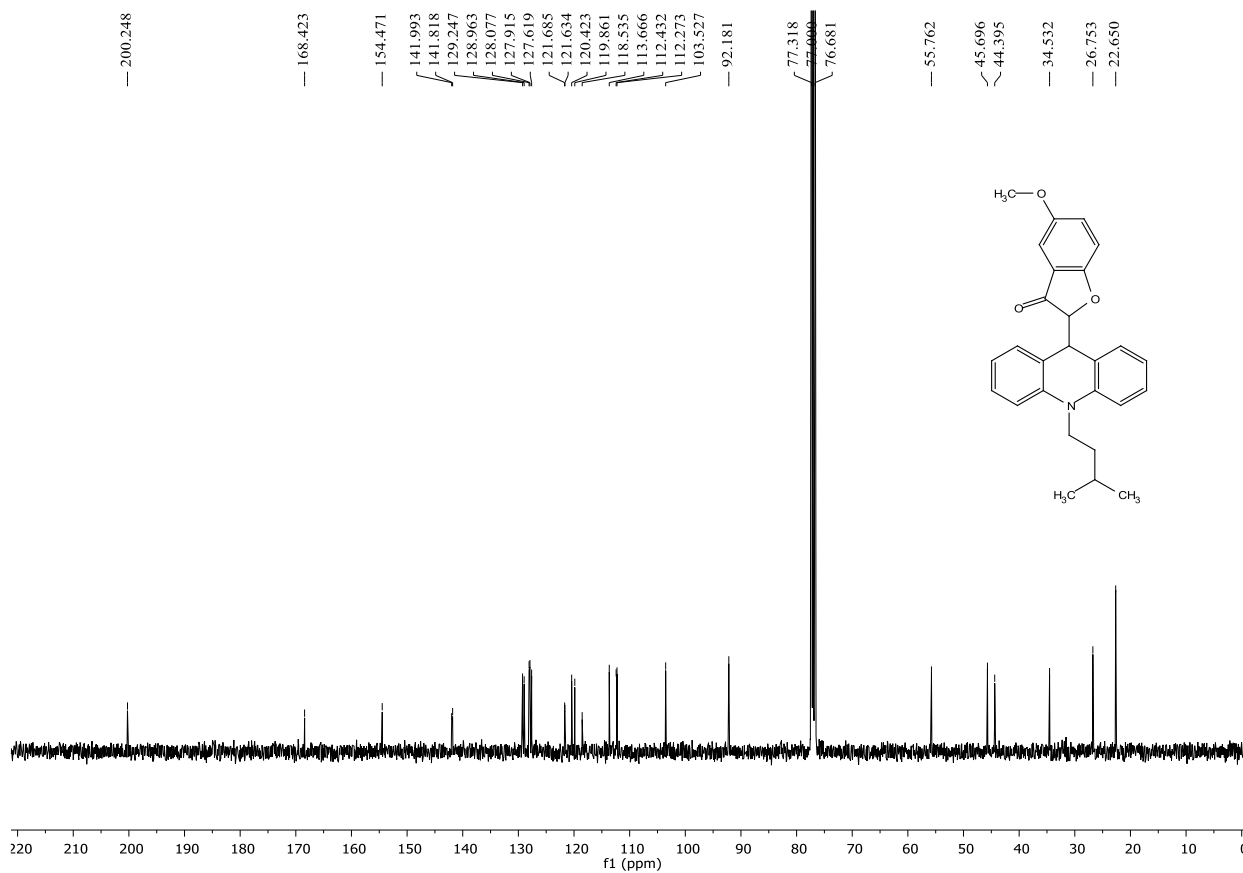

$^1\text{H}$  NMR of **3da** (400 MHz,  $\text{CDCl}_3$ ):

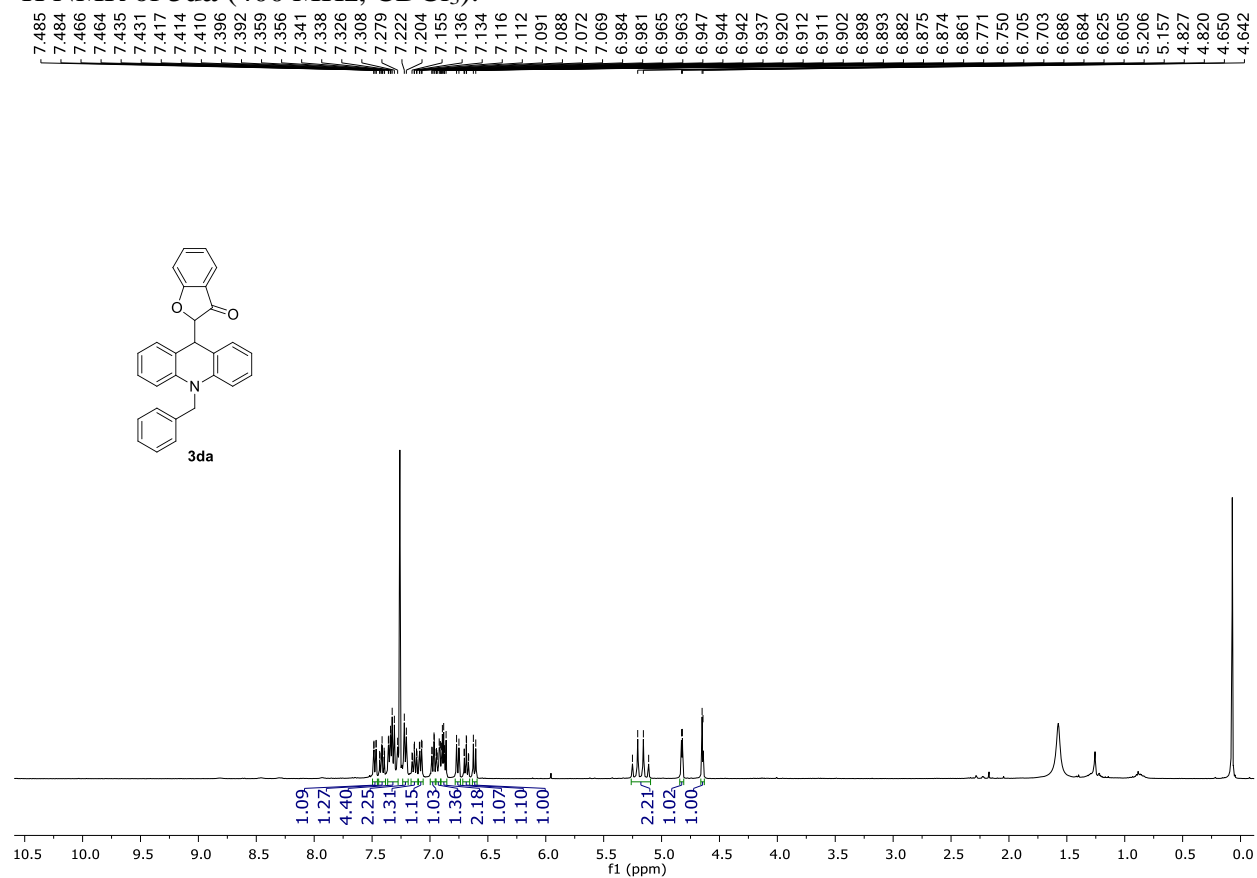

$^{13}\text{C}$   $\{^1\text{H}\}$  NMR of **3da** (100 MHz,  $\text{CDCl}_3$ ):

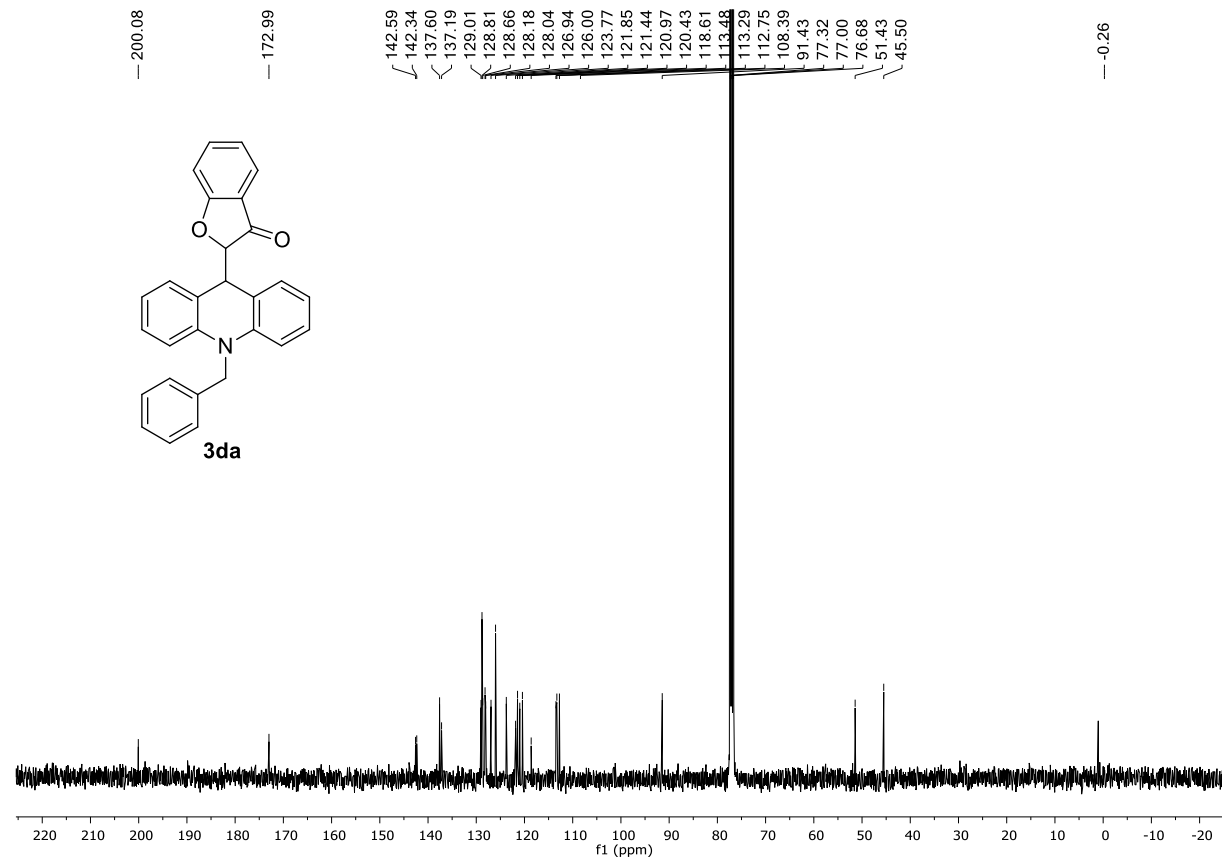

$^1\text{H}$  NMR of **3db** (400 MHz,  $\text{CDCl}_3$ ):

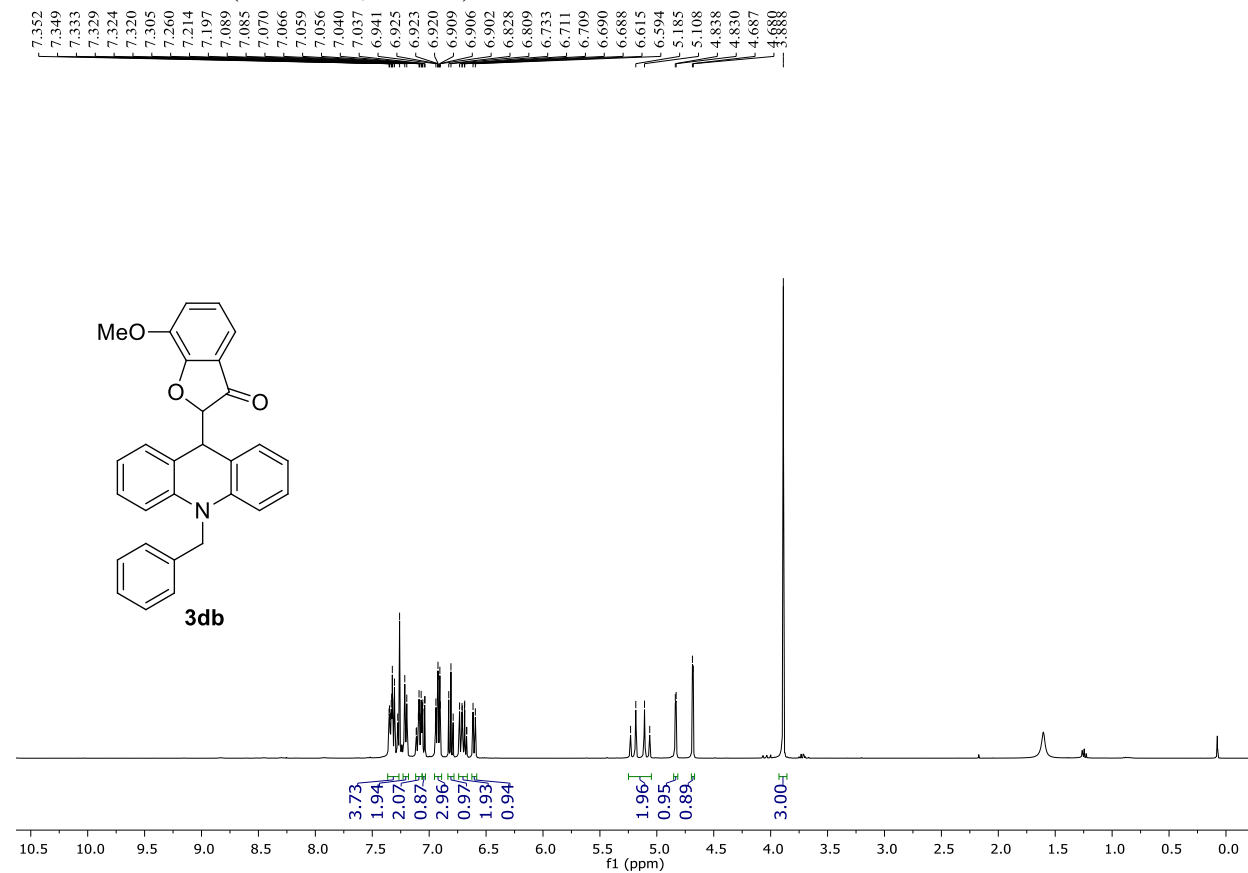

$^{13}\text{C}$   $\{^1\text{H}\}$  NMR of **3db** (100 MHz,  $\text{CDCl}_3$ ):

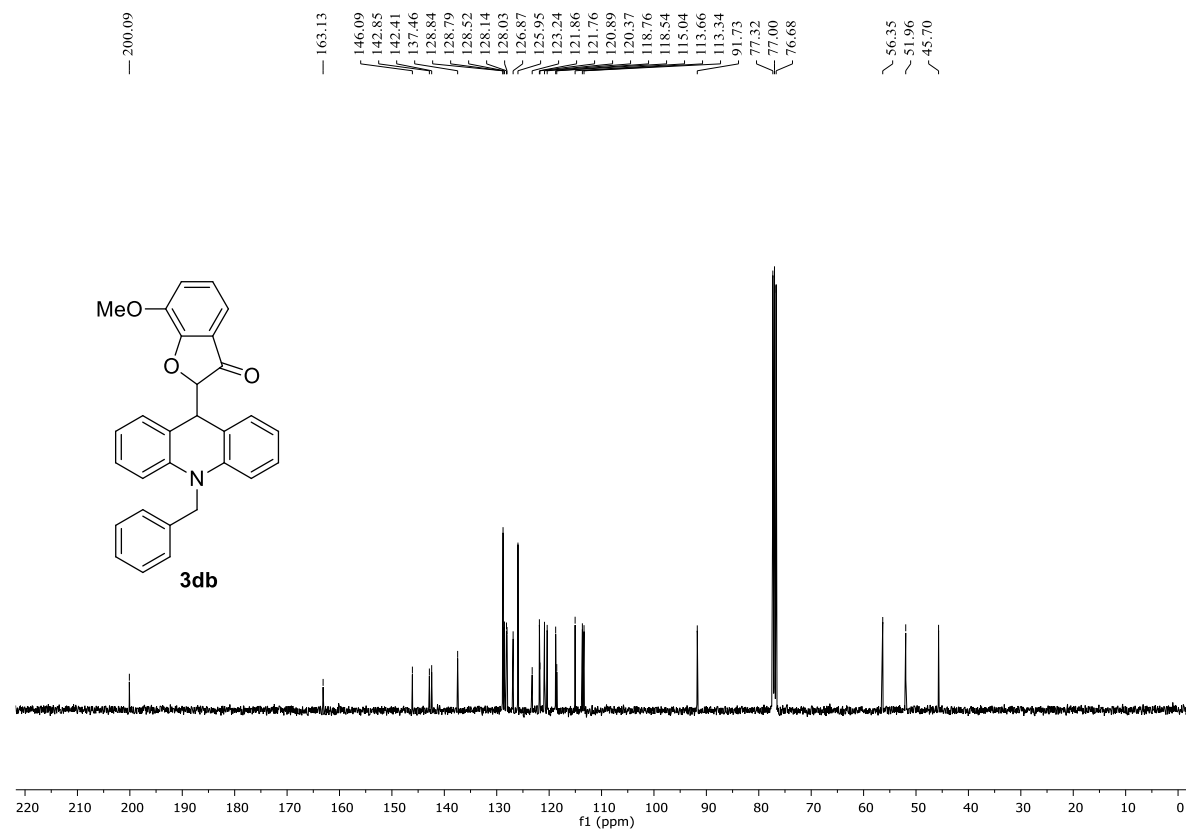

<sup>1</sup>H NMR of **3ea** (400 MHz, CDCl<sub>3</sub>):

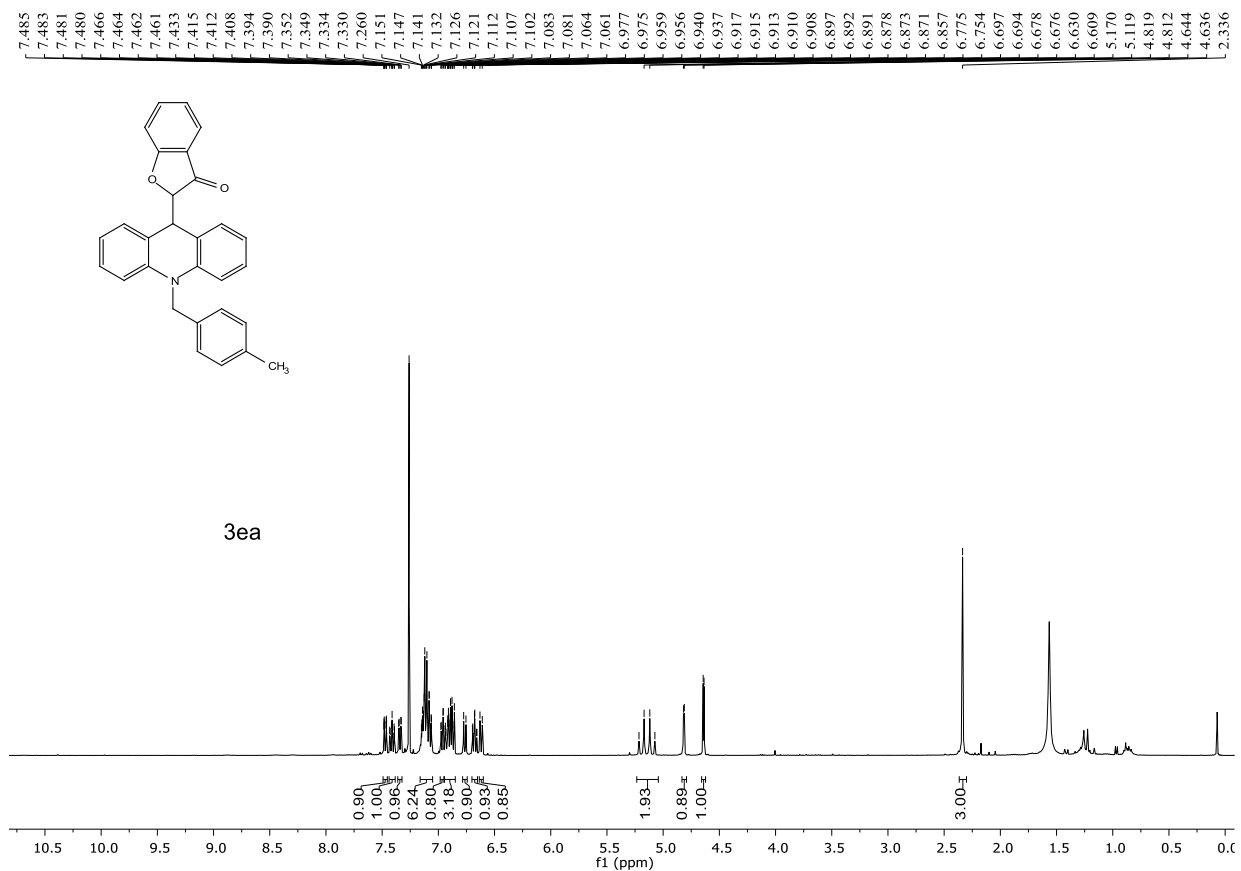

<sup>13</sup>C {<sup>1</sup>H} NMR of **3ea** (100 MHz, CDCl<sub>3</sub>):

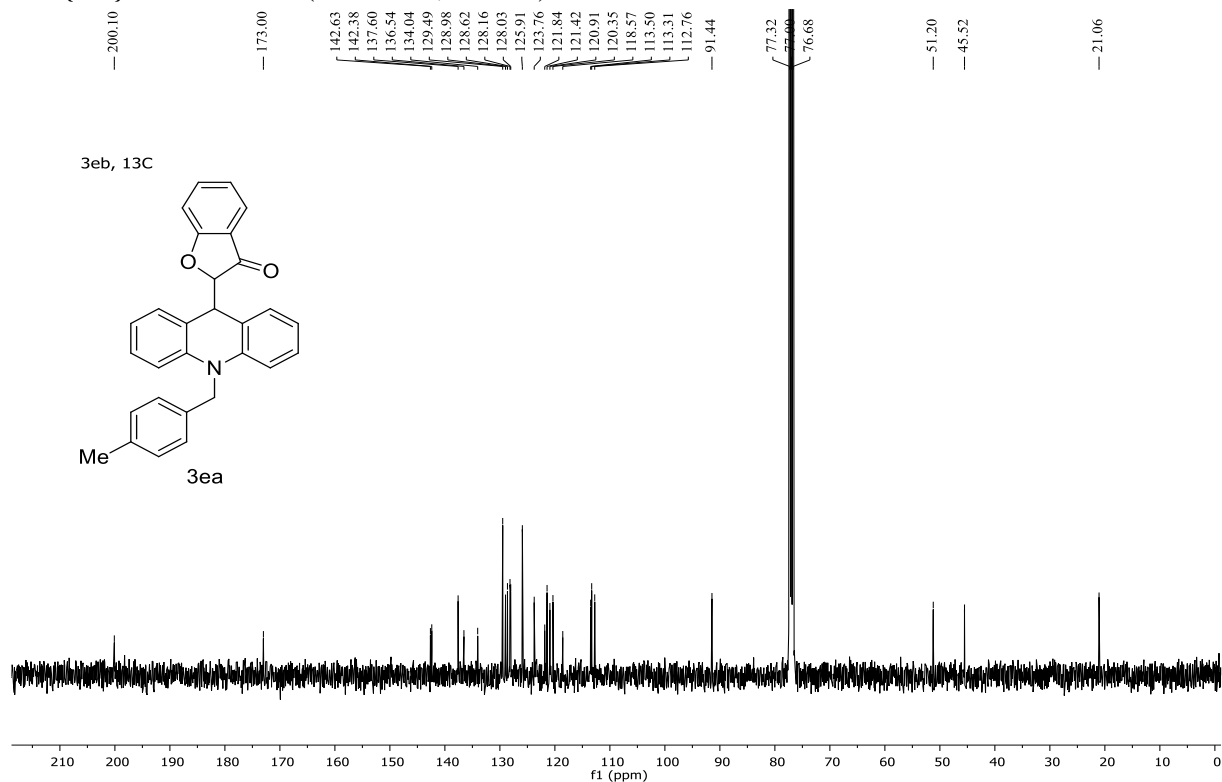

<sup>1</sup>H NMR of **3eb** (400 MHz, CDCl<sub>3</sub>):

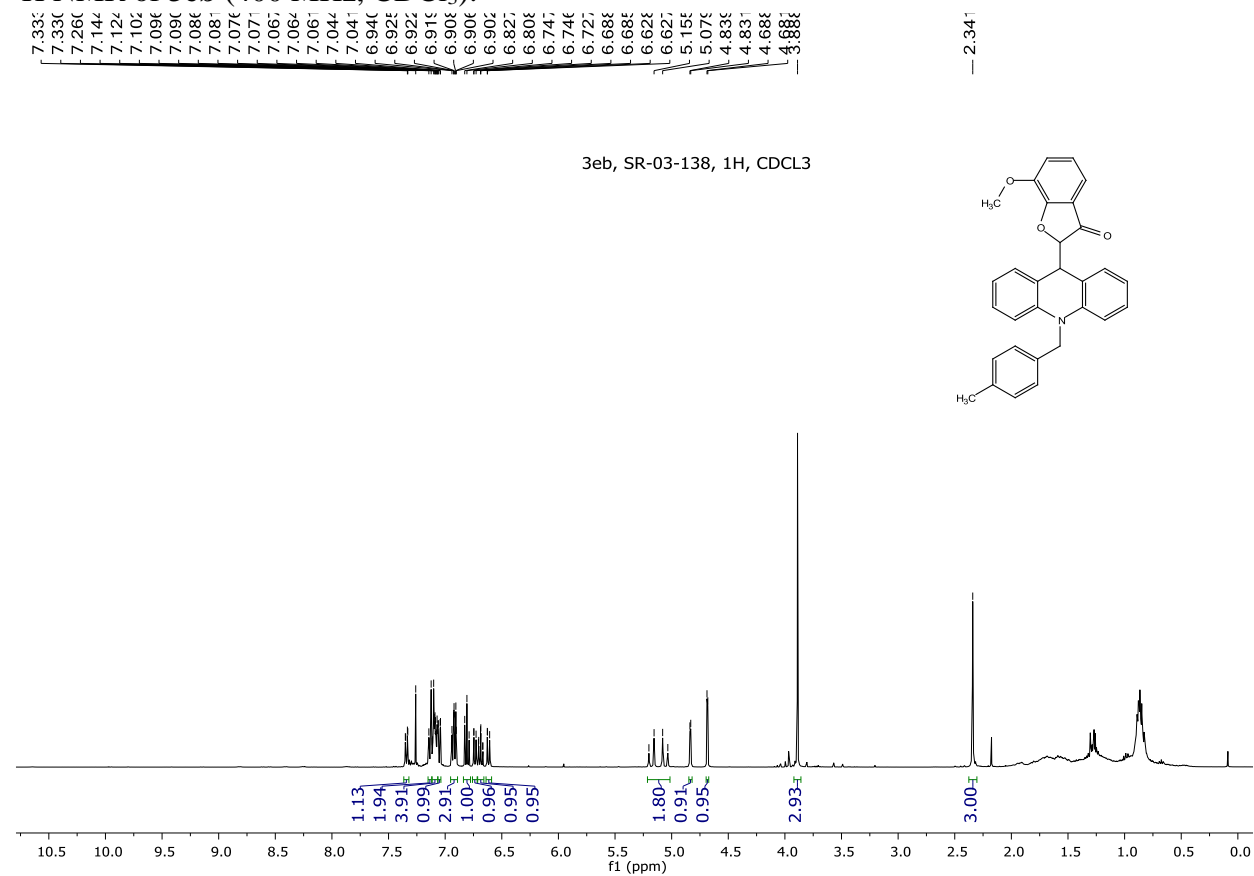

<sup>13</sup>C {<sup>1</sup>H} NMR of **3eb** (100 MHz, CDCl<sub>3</sub>):

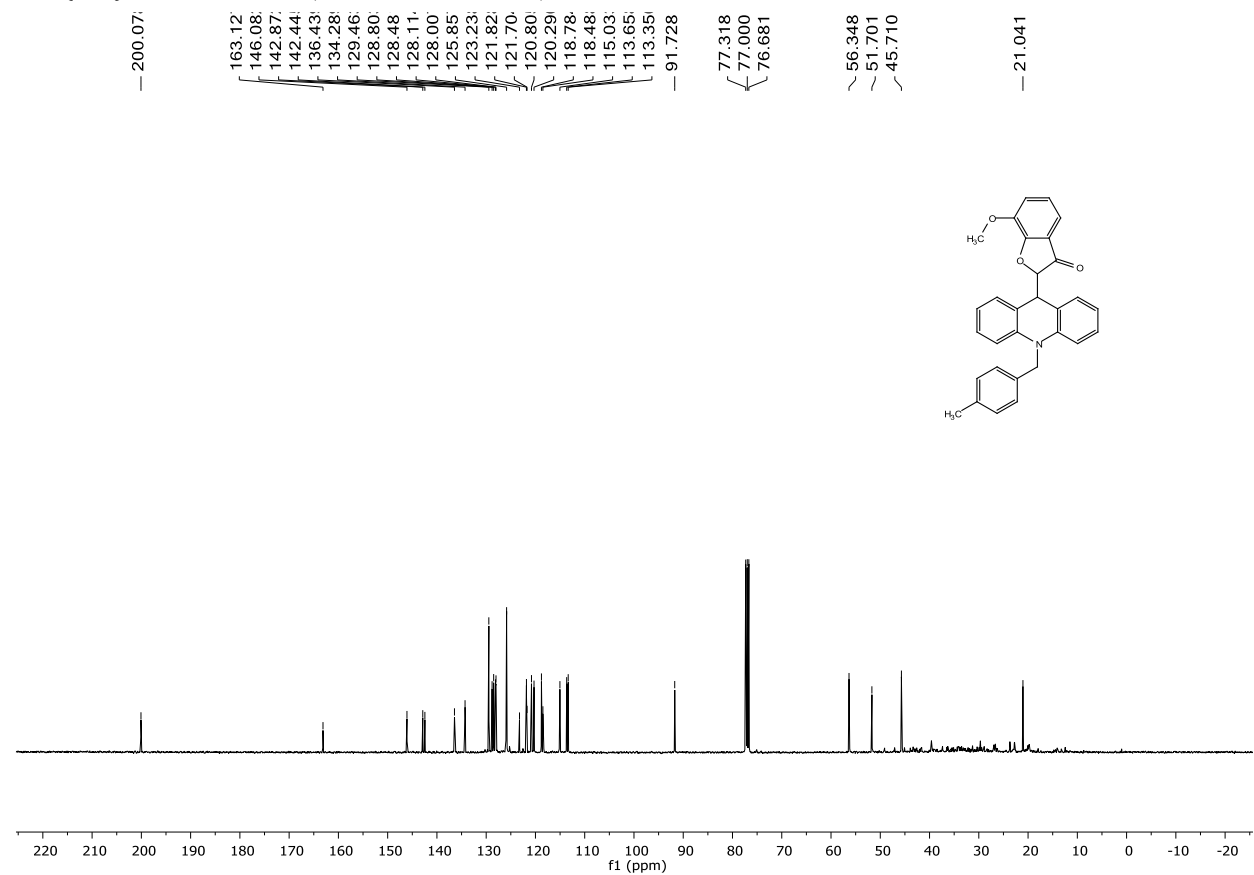

<sup>1</sup>H NMR of **3fa** (400 MHz, CDCl<sub>3</sub>):

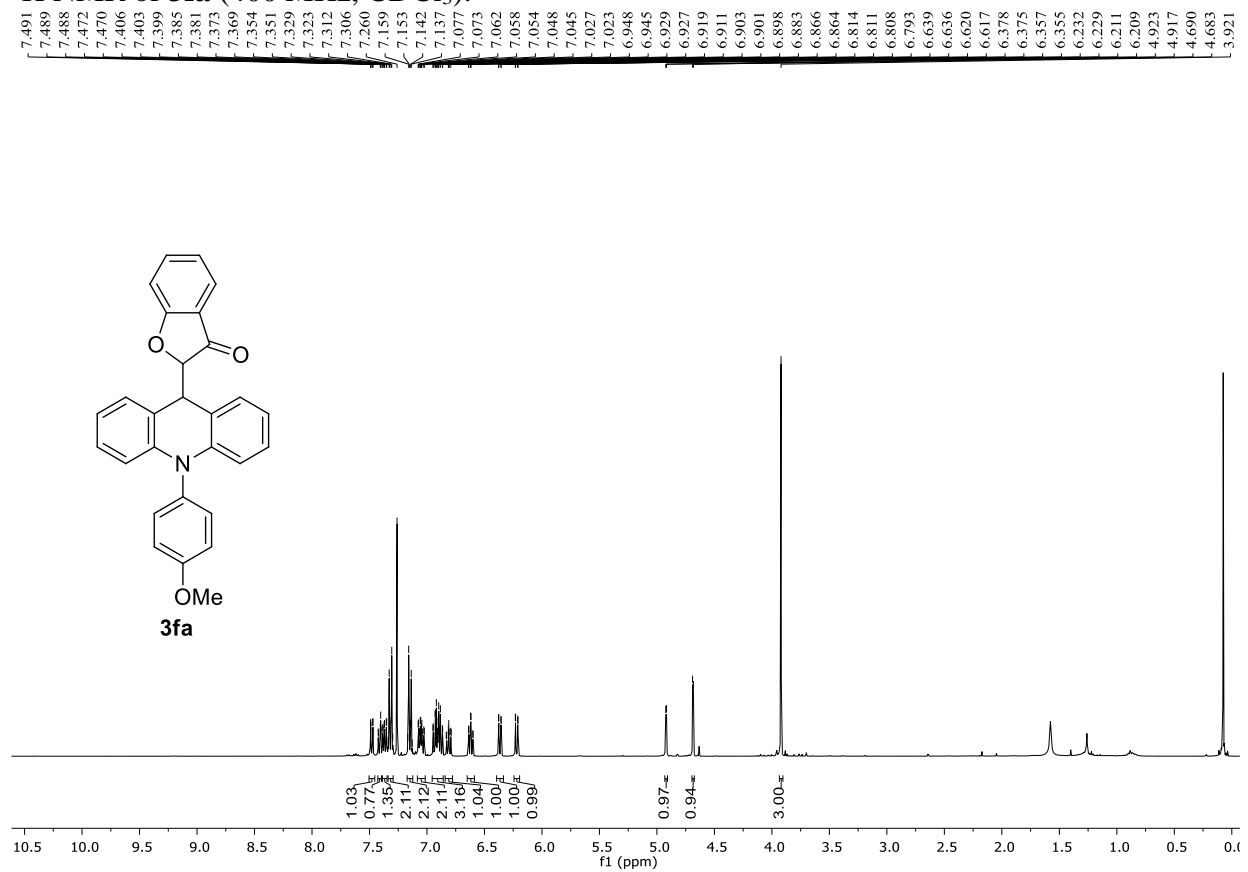

<sup>13</sup>C {<sup>1</sup>H} NMR of **3fa** (100 MHz, CDCl<sub>3</sub>):

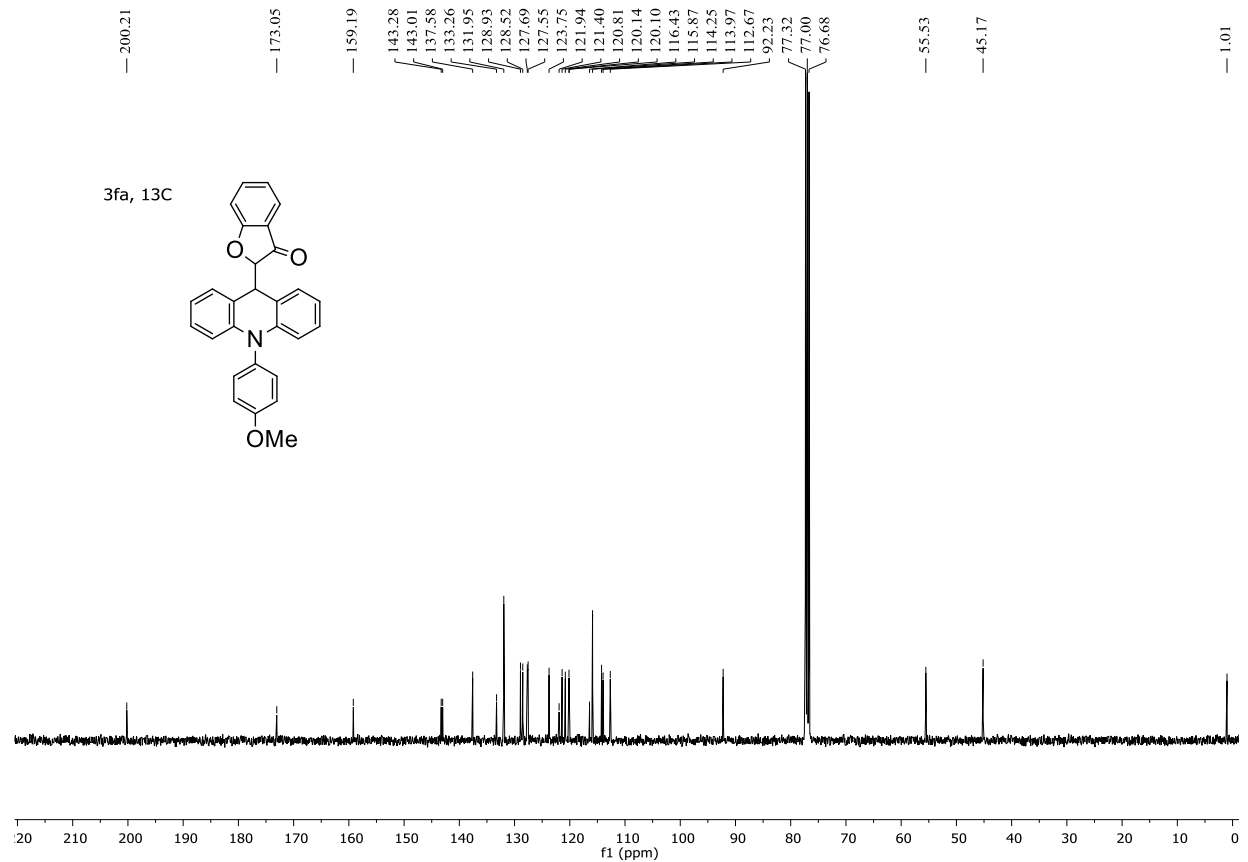

<sup>1</sup>H NMR of **3ga** (400 MHz, CDCl<sub>3</sub>):

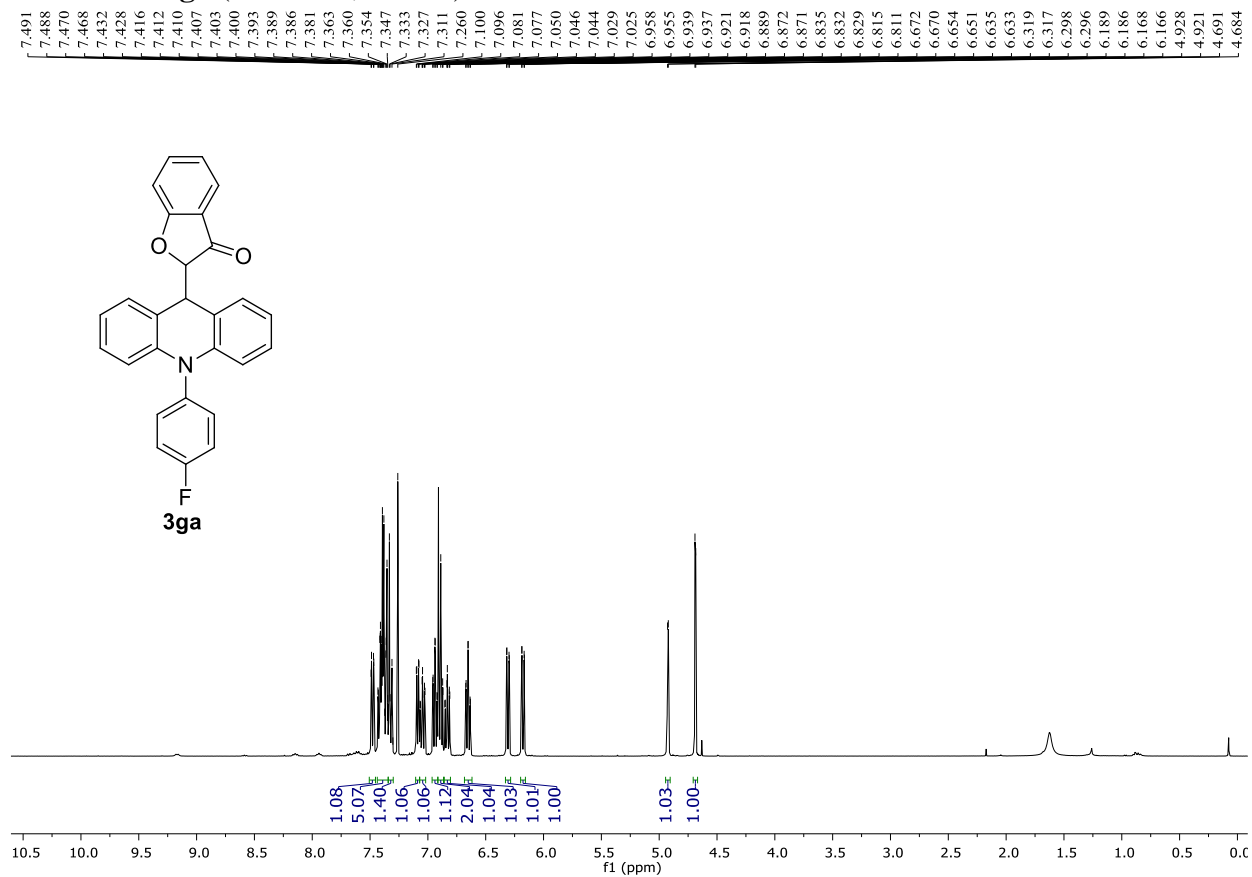

<sup>13</sup>C {<sup>1</sup>H} NMR of **3ga** (100 MHz, CDCl<sub>3</sub>):

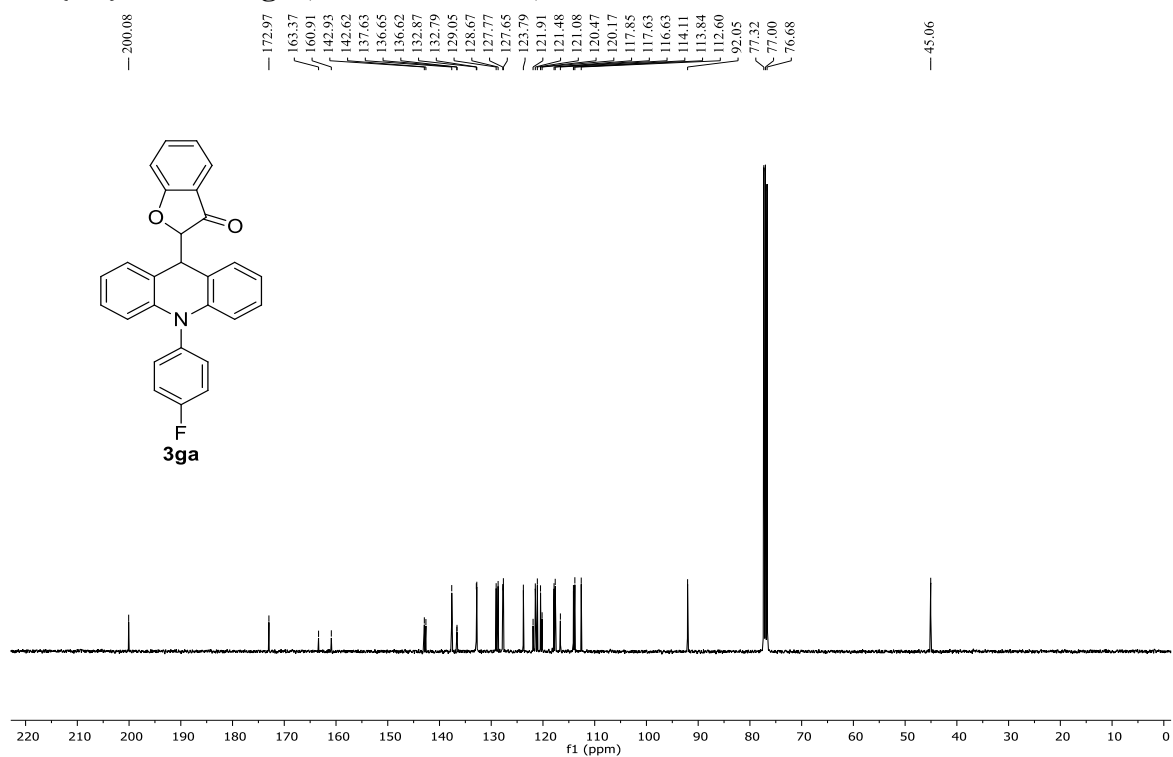

<sup>1</sup>H NMR of **3ha** (400 MHz, CDCl<sub>3</sub>):

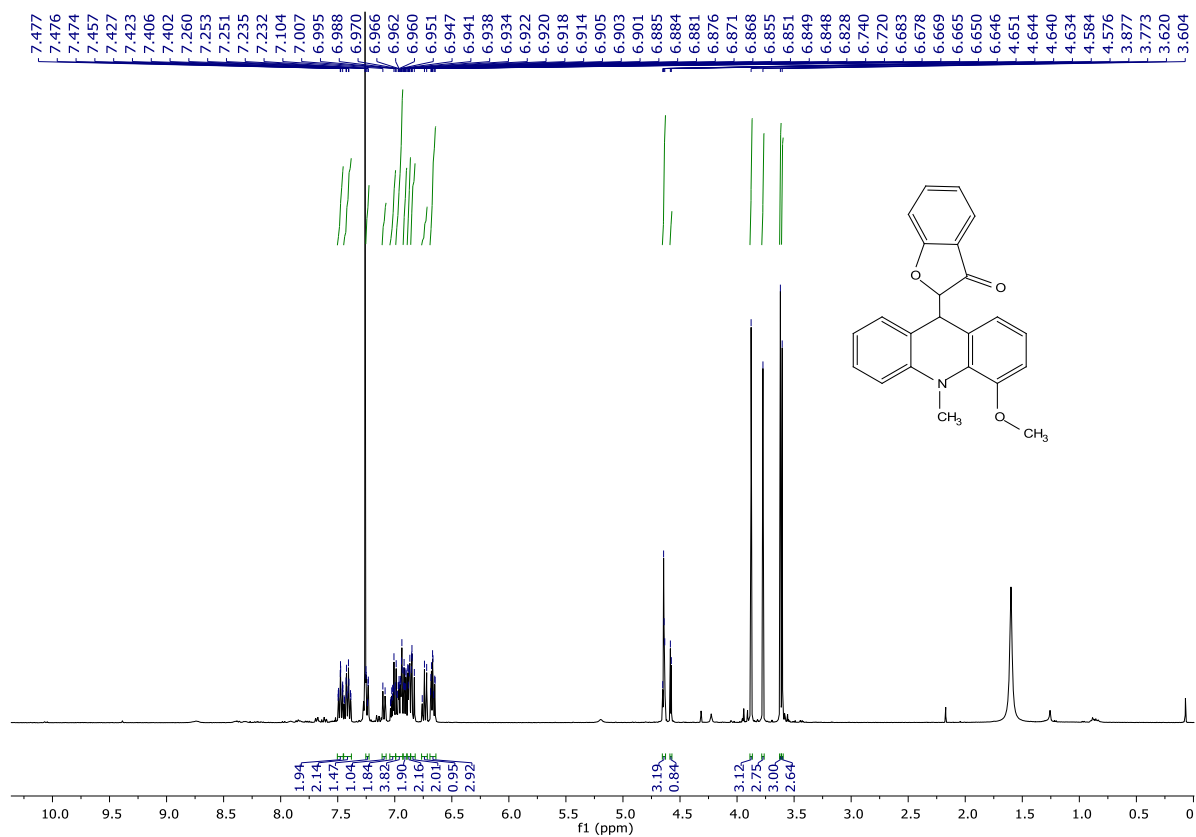

<sup>13</sup>C {<sup>1</sup>H} NMR of **3ha** (100 MHz, CDCl<sub>3</sub>):

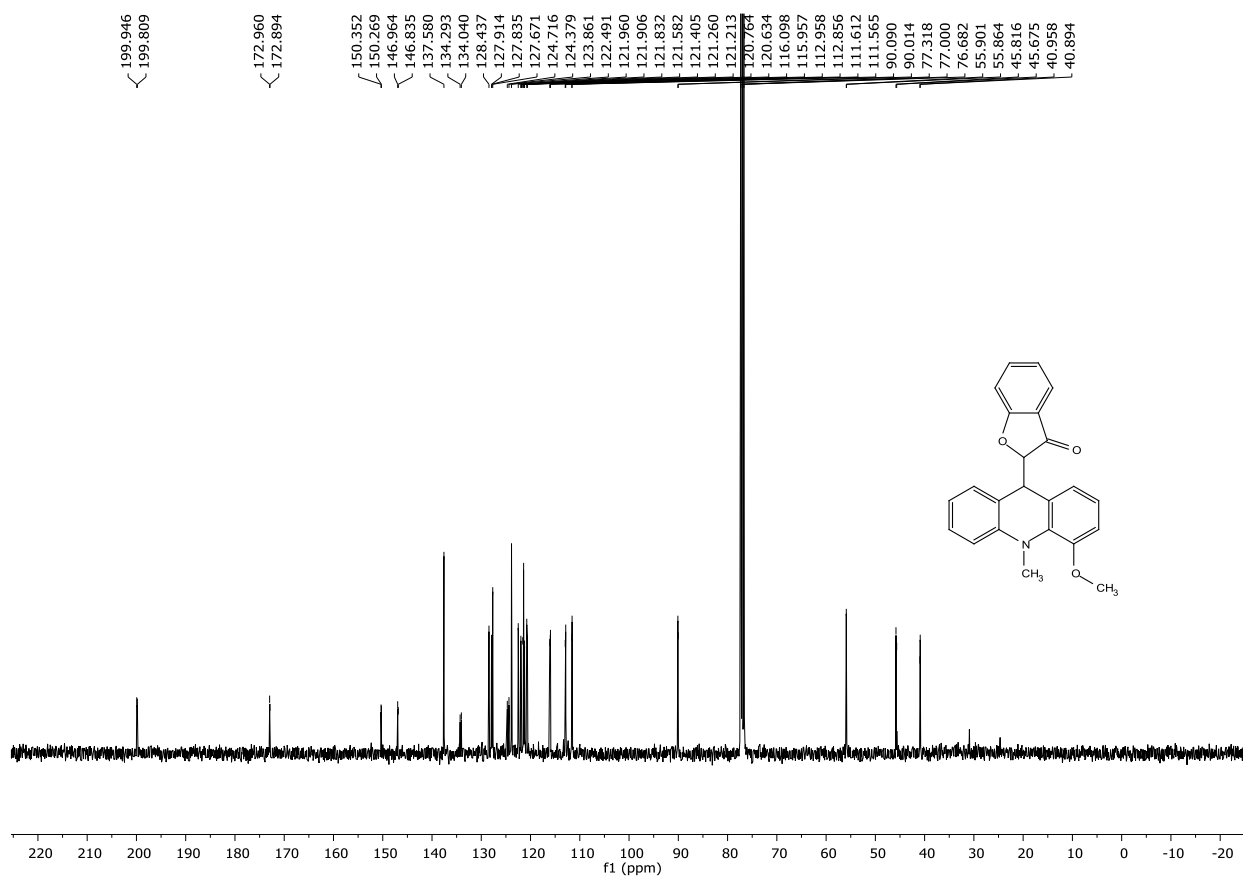



<sup>1</sup>H NMR of **3ia** (400 MHz, CDCl<sub>3</sub>):

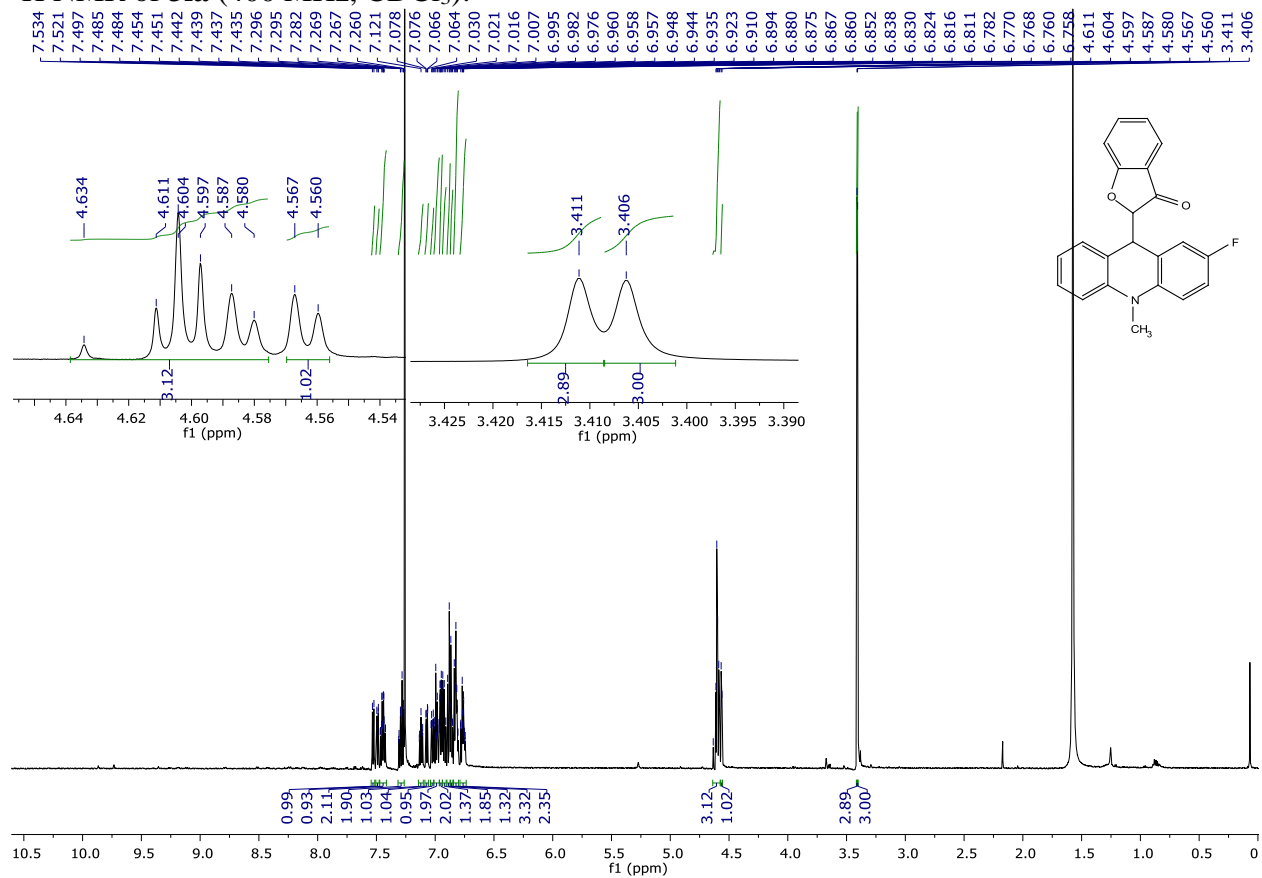

<sup>13</sup>C {<sup>1</sup>H} NMR of **3ia** (100 MHz, CDCl<sub>3</sub>):

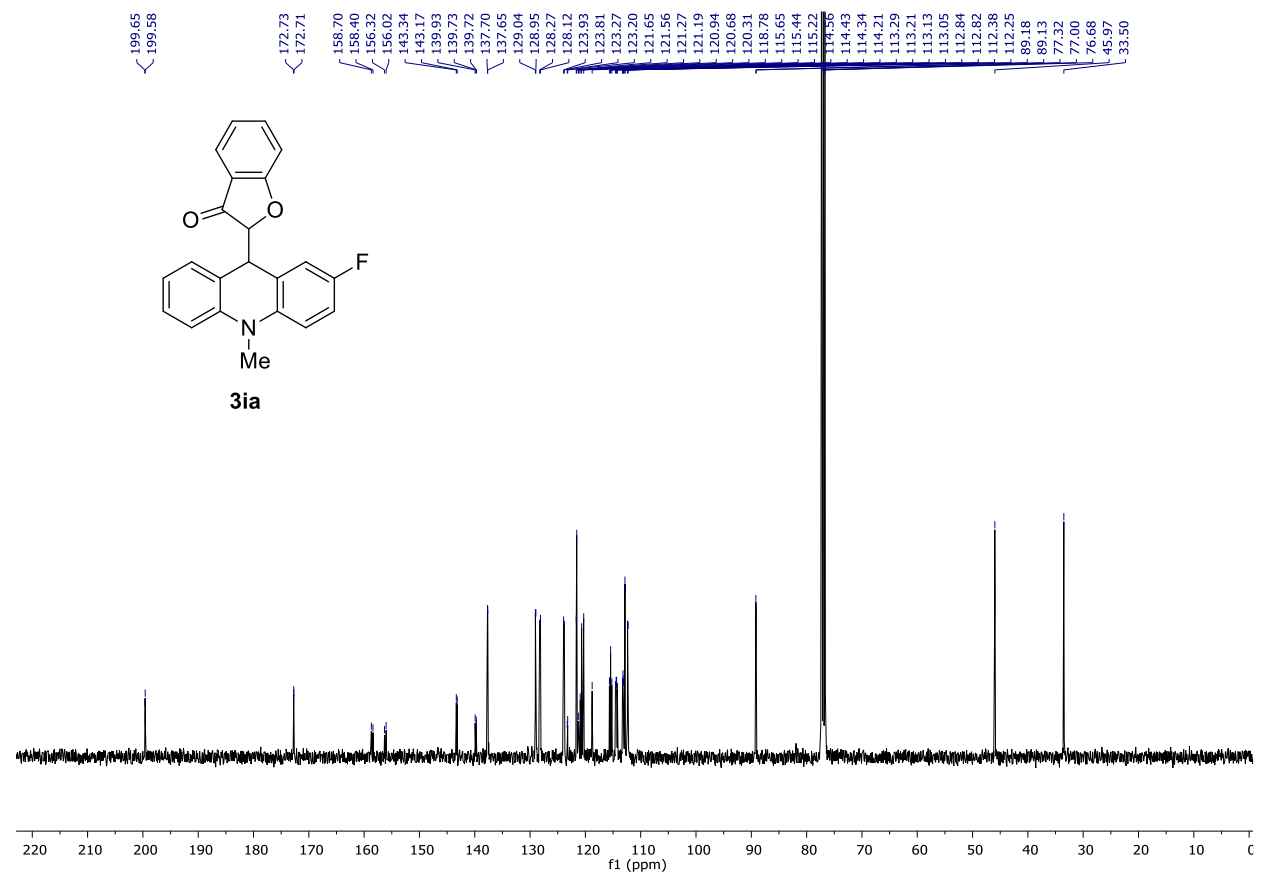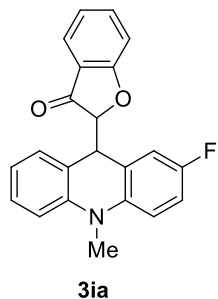

$^{19}\text{F}$  NMR of **3ia** (376 MHz,  $\text{CDCl}_3$ ):

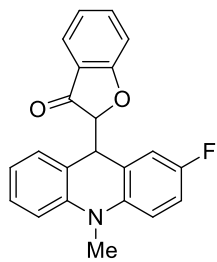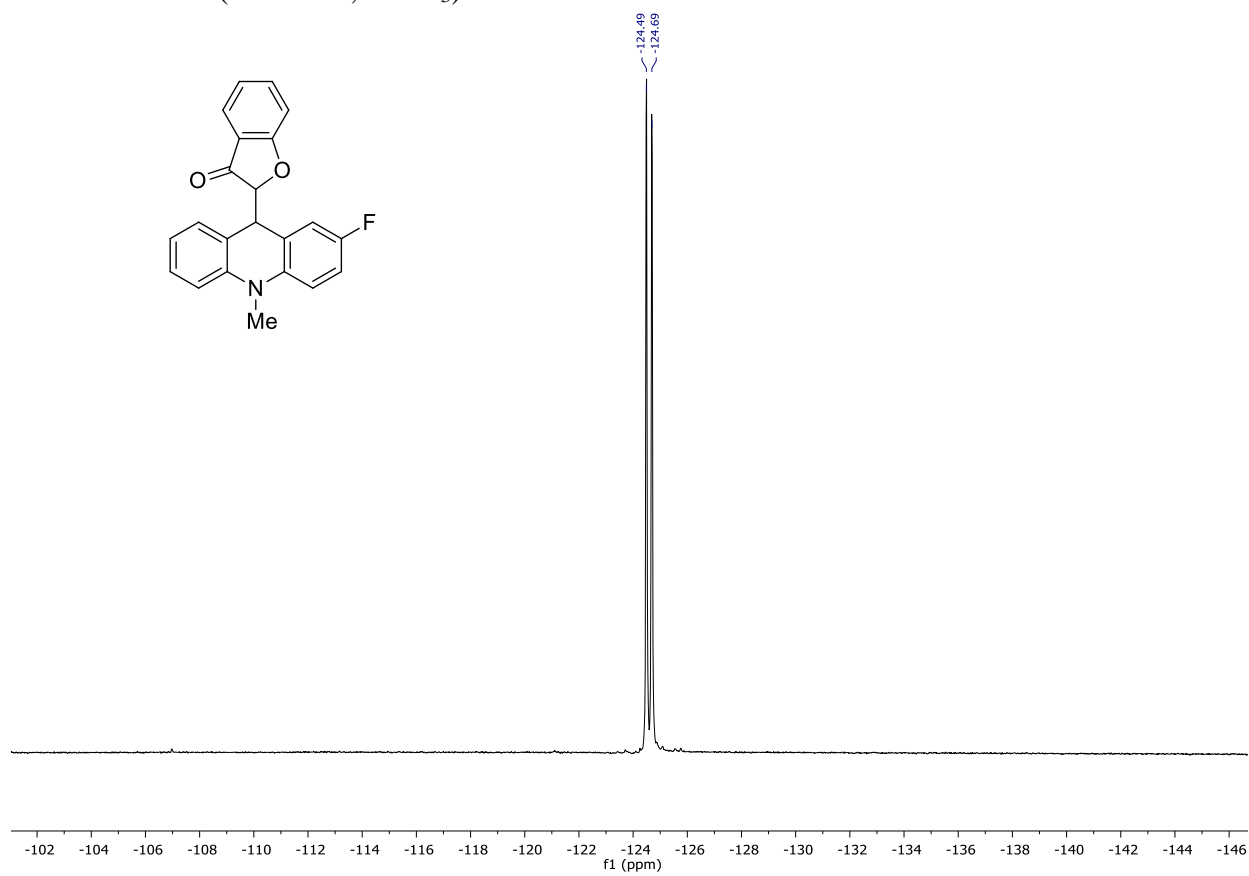

<sup>1</sup>H NMR of **5aa** (400 MHz, CDCl<sub>3</sub>):

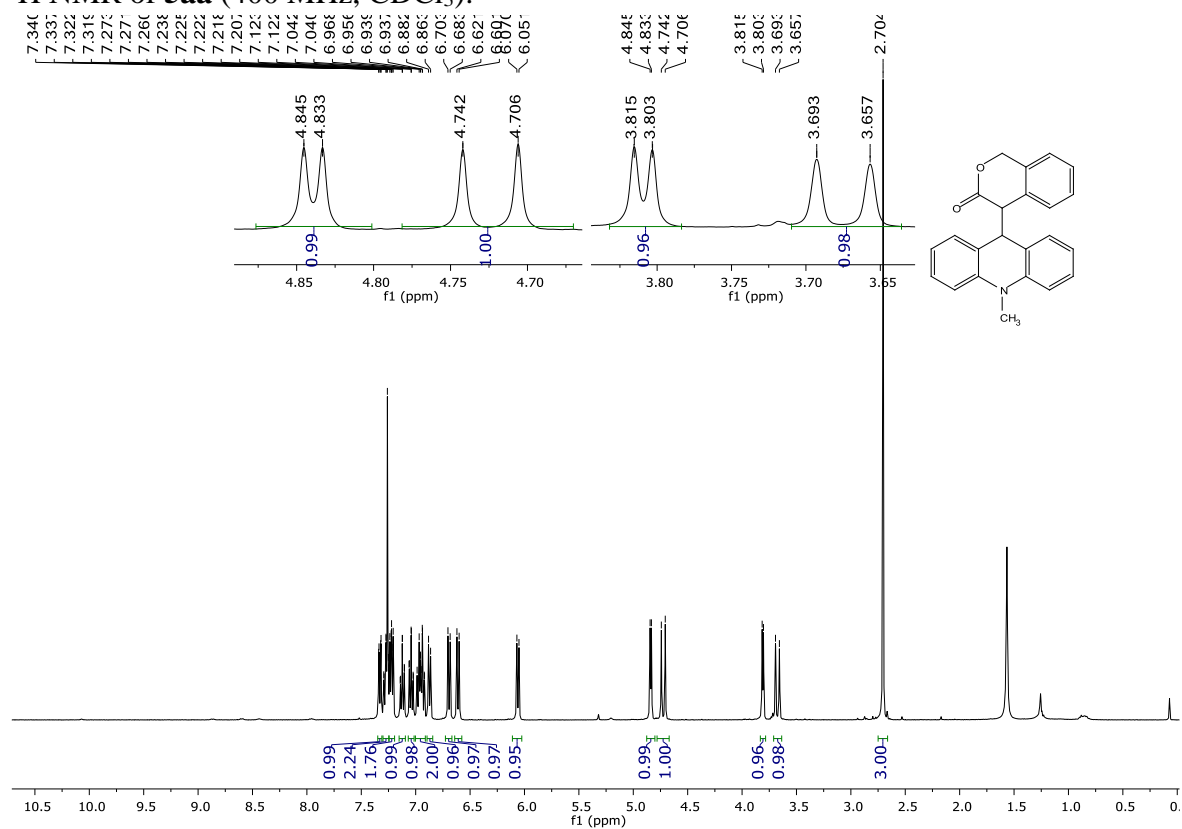

<sup>13</sup>C {<sup>1</sup>H} NMR of **5aa** (100 MHz, CDCl<sub>3</sub>):

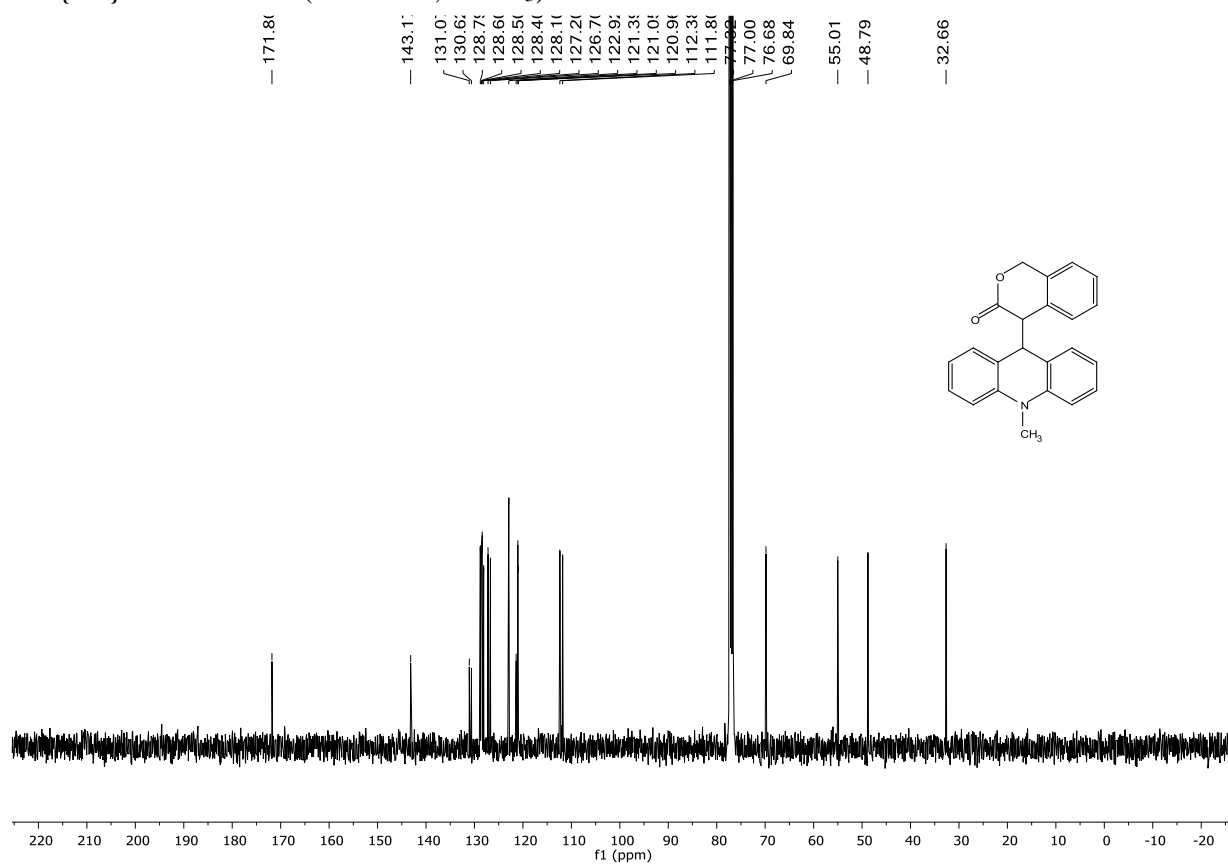

$^1\text{H}$  NMR of **5ba** (400 MHz,  $\text{CDCl}_3$ ):

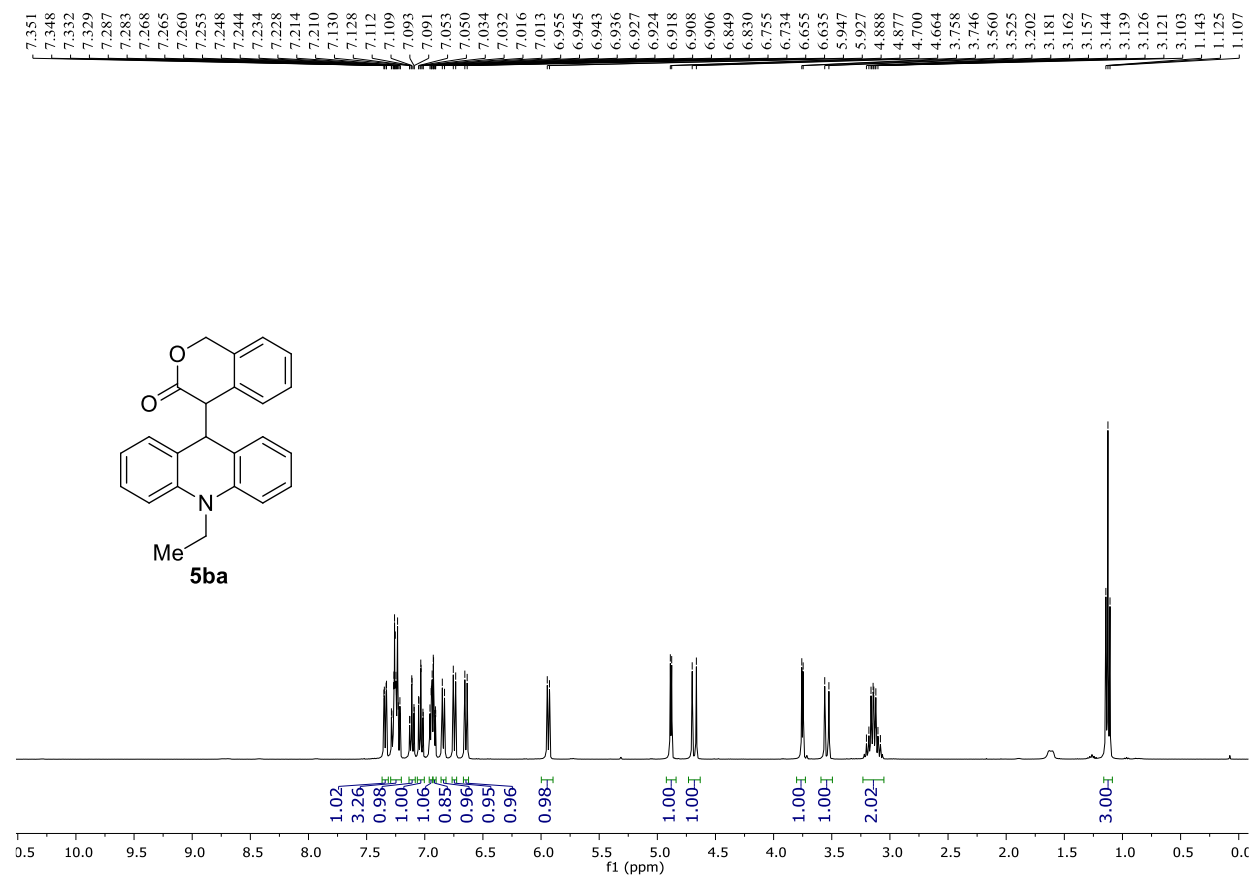

$^{13}\text{C}$  { $^1\text{H}$ } NMR of **5ba** (100 MHz,  $\text{CDCl}_3$ ):

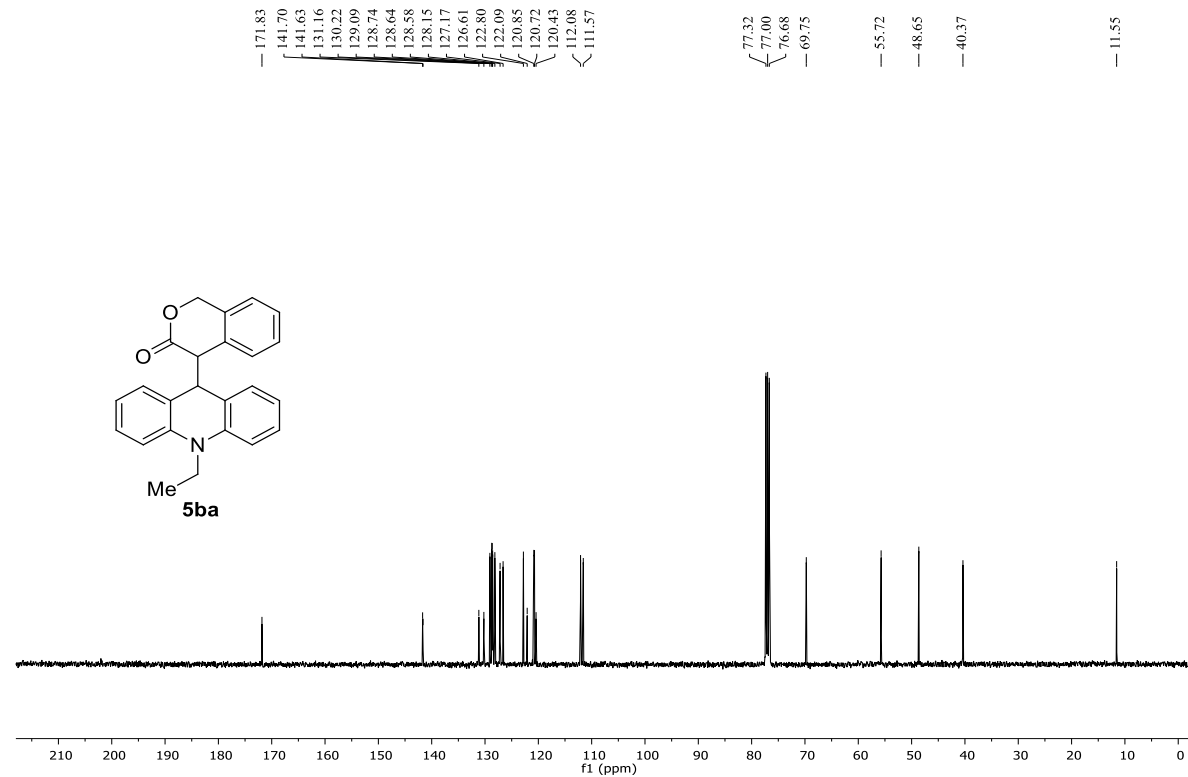

<sup>1</sup>H NMR of **5ca** (400 MHz, CDCl<sub>3</sub>):

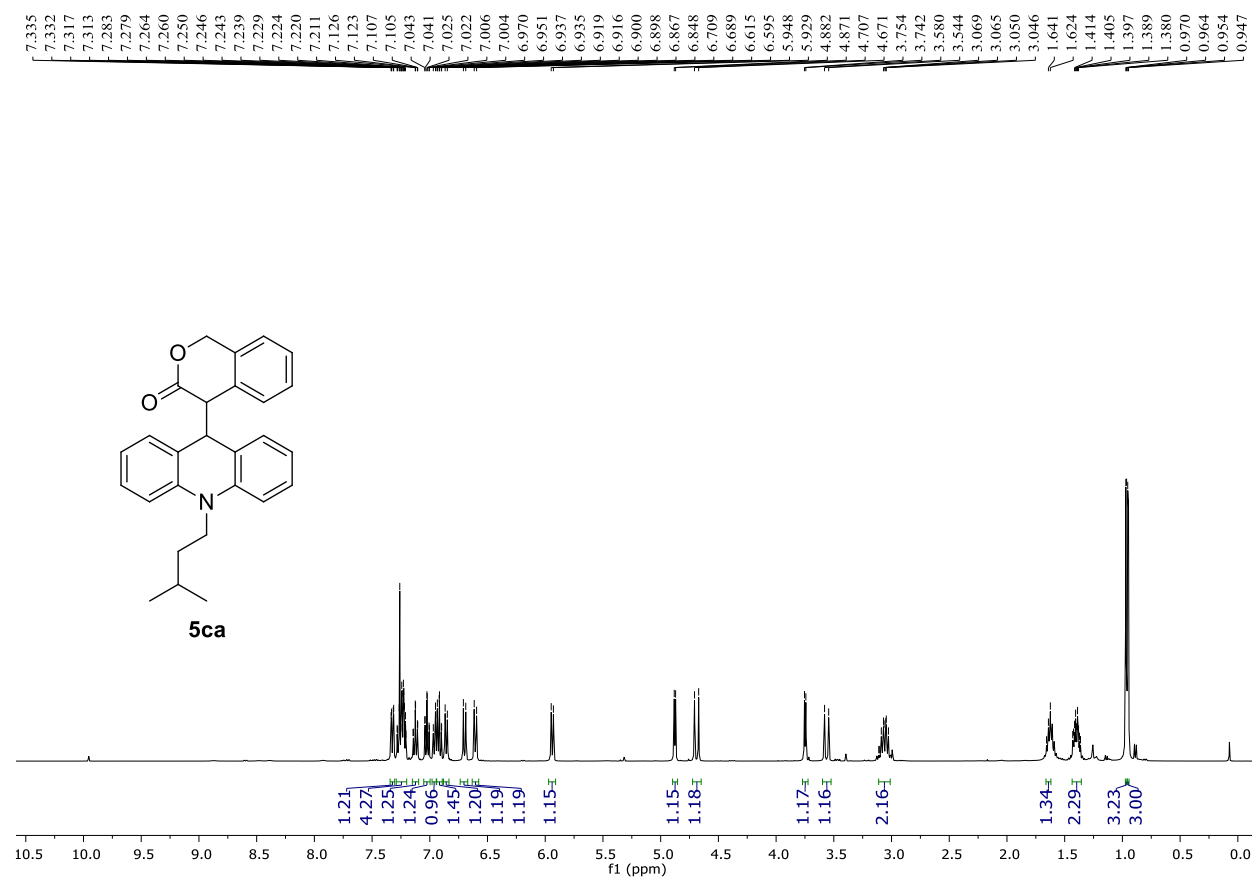

<sup>13</sup>C {<sup>1</sup>H} NMR of **5ca** (100 MHz, CDCl<sub>3</sub>):

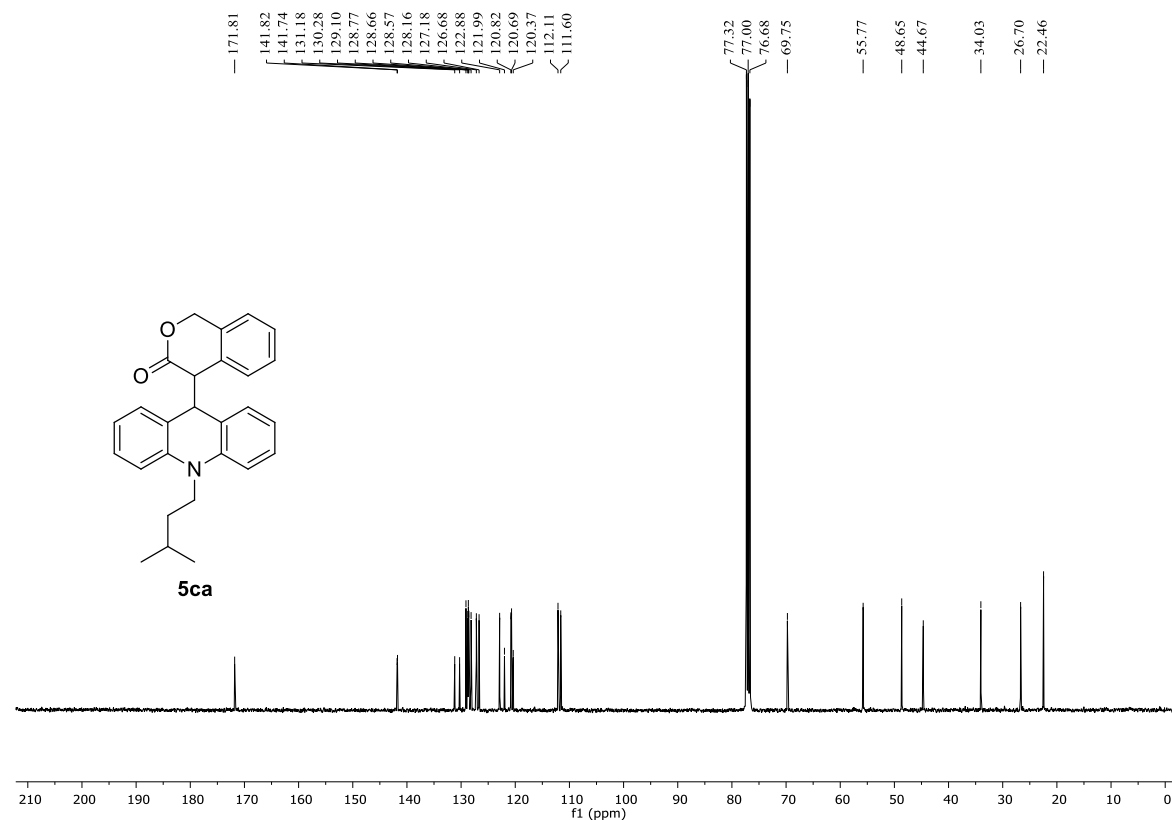

$^1\text{H}$  NMR of **5da** (400 MHz,  $\text{CDCl}_3$ ):

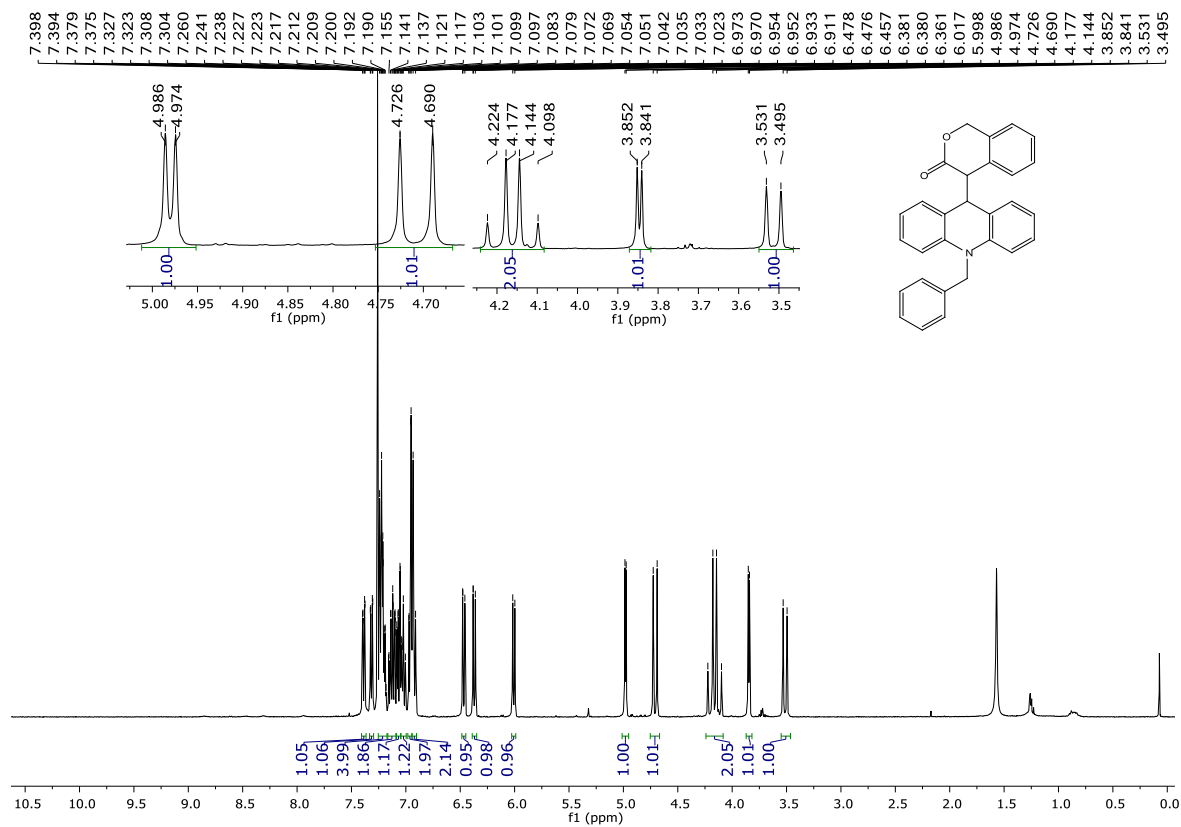

$^{13}\text{C}$   $\{^1\text{H}\}$  NMR of **5da** (100 MHz,  $\text{CDCl}_3$ ):

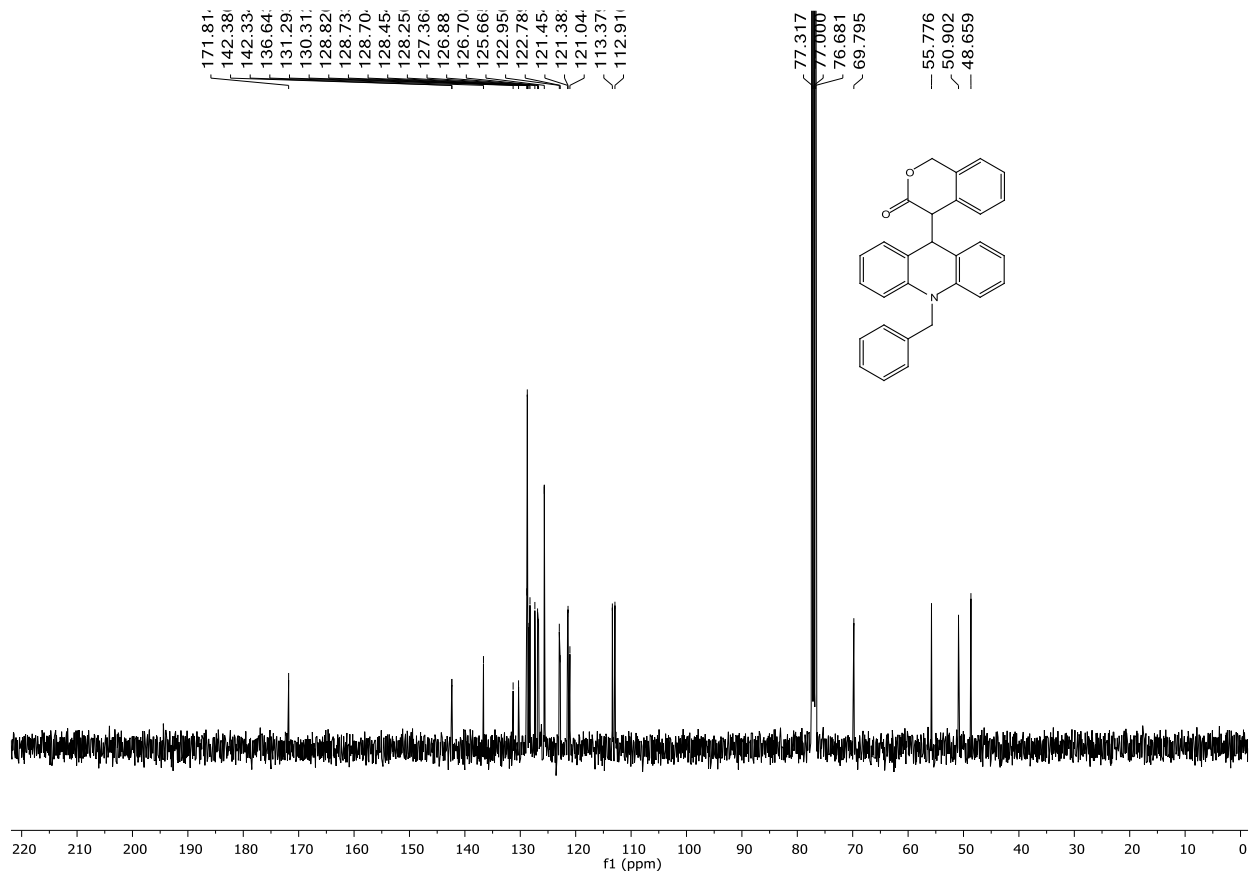

<sup>1</sup>H NMR of **5ja** (400 MHz, CDCl<sub>3</sub>):

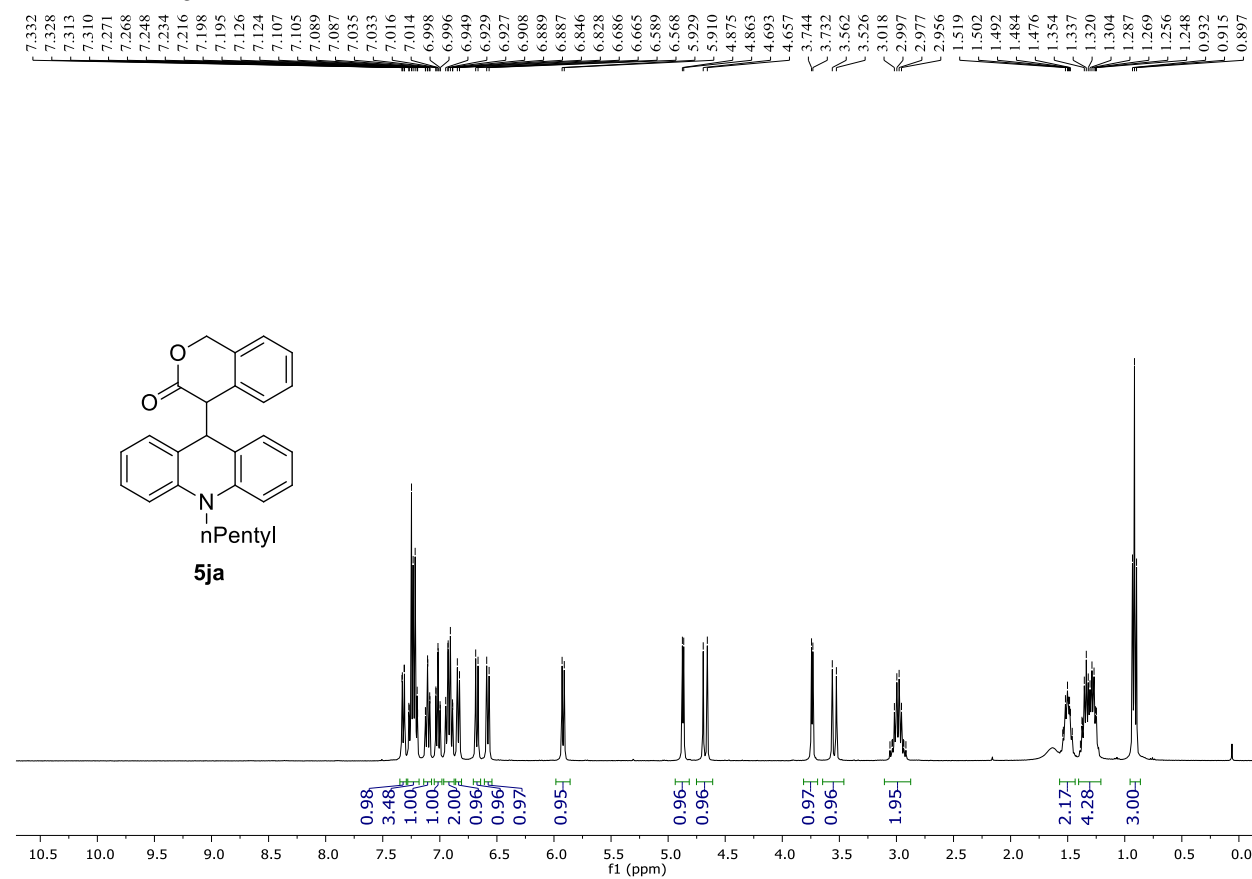

<sup>13</sup>C {<sup>1</sup>H} NMR of **5ja** (100 MHz, CDCl<sub>3</sub>):

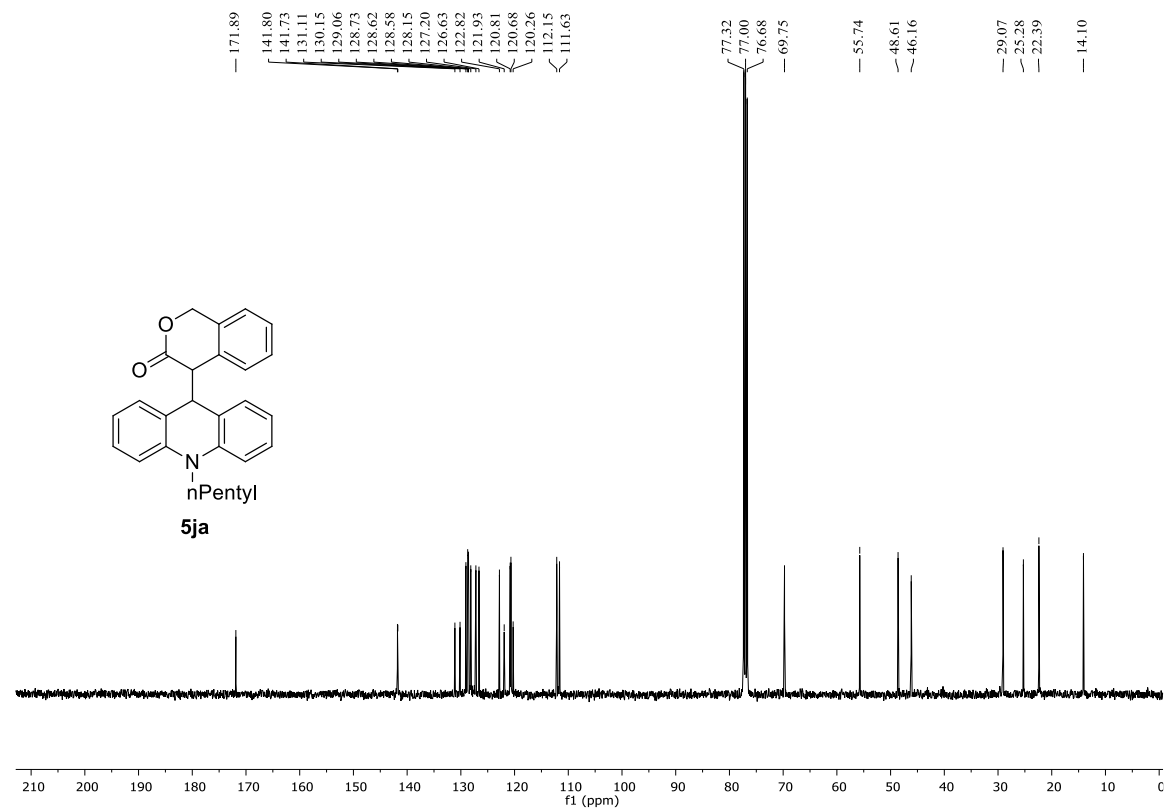

$^1\text{H}$  NMR of **5ka** (400 MHz,  $\text{CDCl}_3$ ):

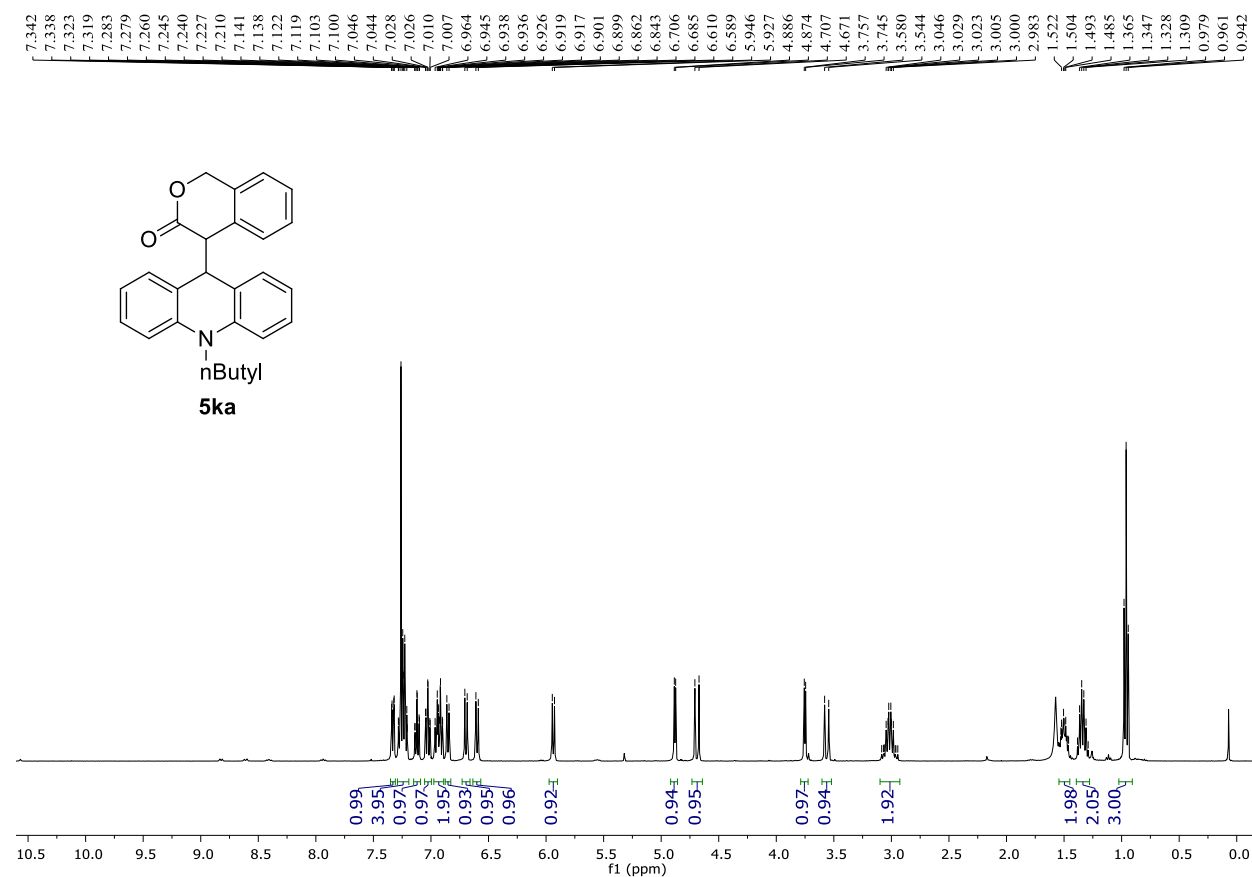

$^{13}\text{C}$  { $^1\text{H}$ } NMR of **5ka** (100 MHz,  $\text{CDCl}_3$ ):

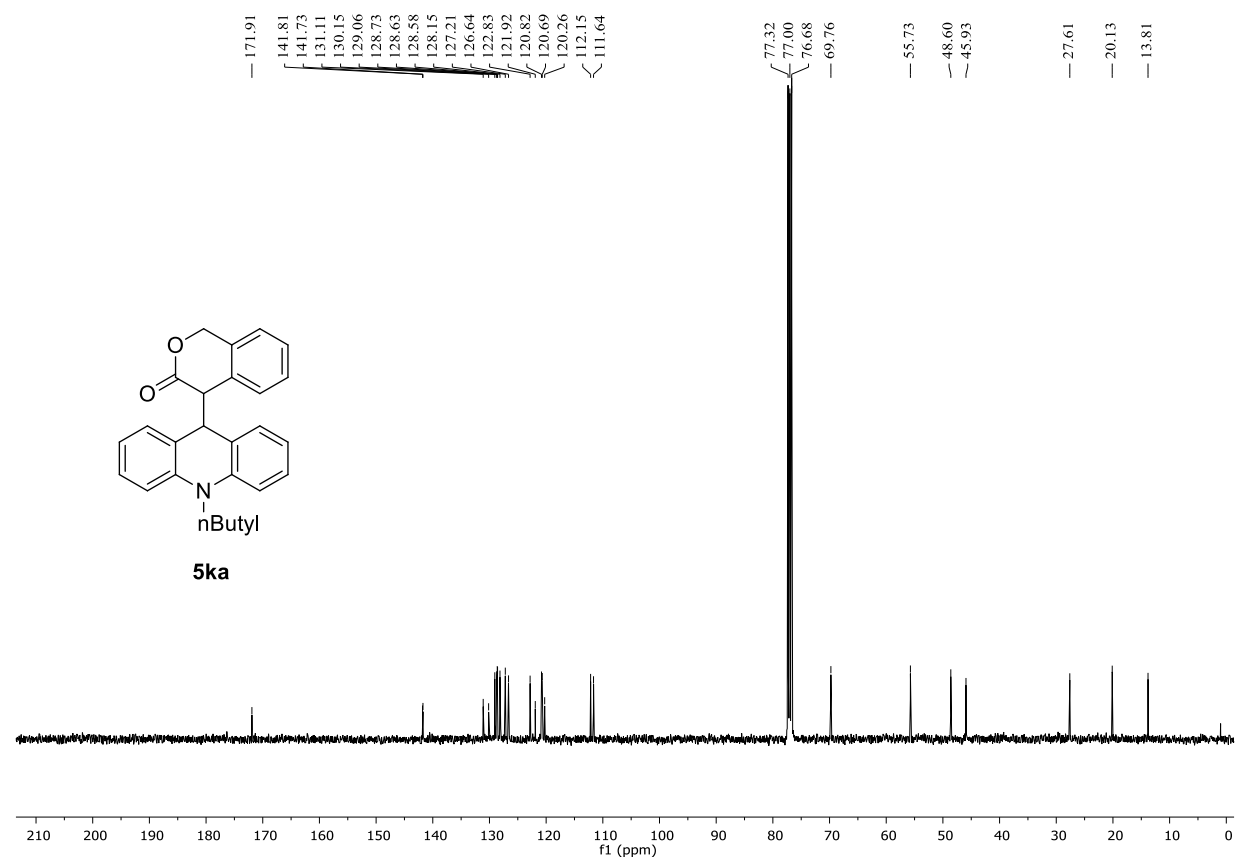



$^1\text{H}$  NMR of **5la** (400 MHz,  $\text{CDCl}_3$ ):

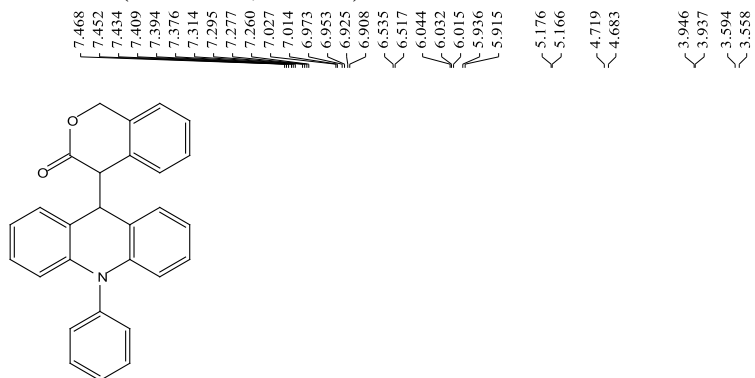

**5la**

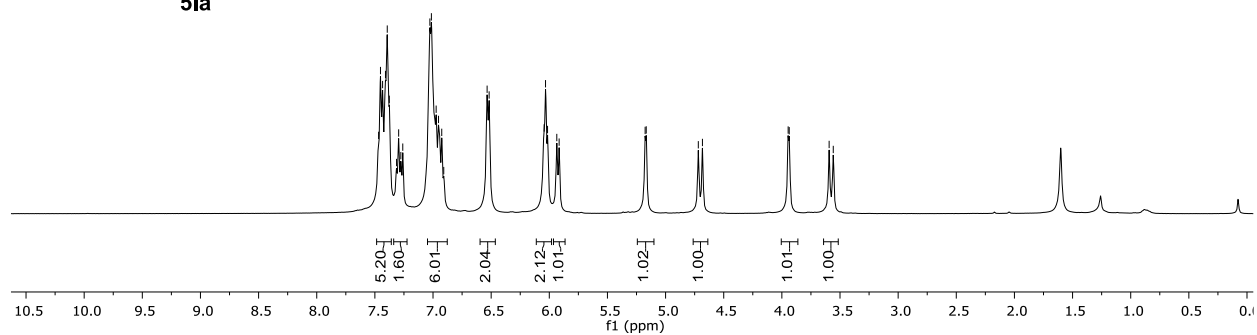

$^{13}\text{C}$  { $^1\text{H}$ } NMR of **5la** (100 MHz,  $\text{CDCl}_3$ ):

**5la,  $^{13}\text{C}$**

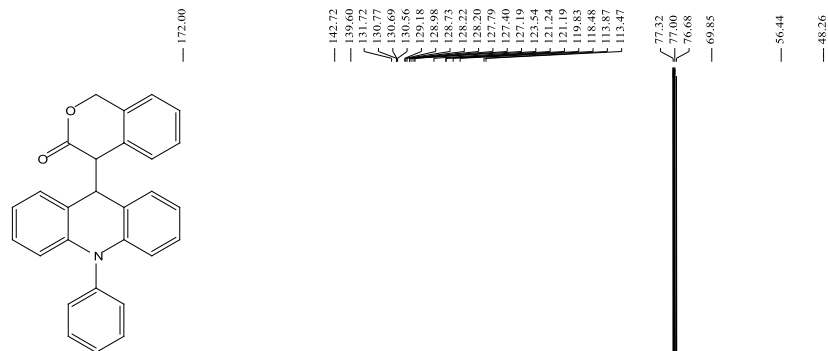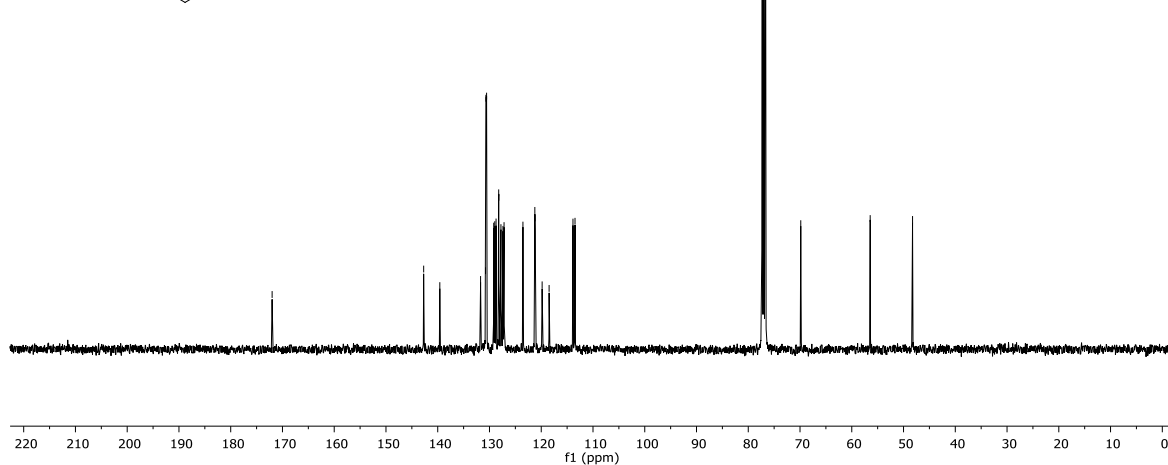

<sup>1</sup>H NMR of **5ma** (400 MHz, CDCl<sub>3</sub>):

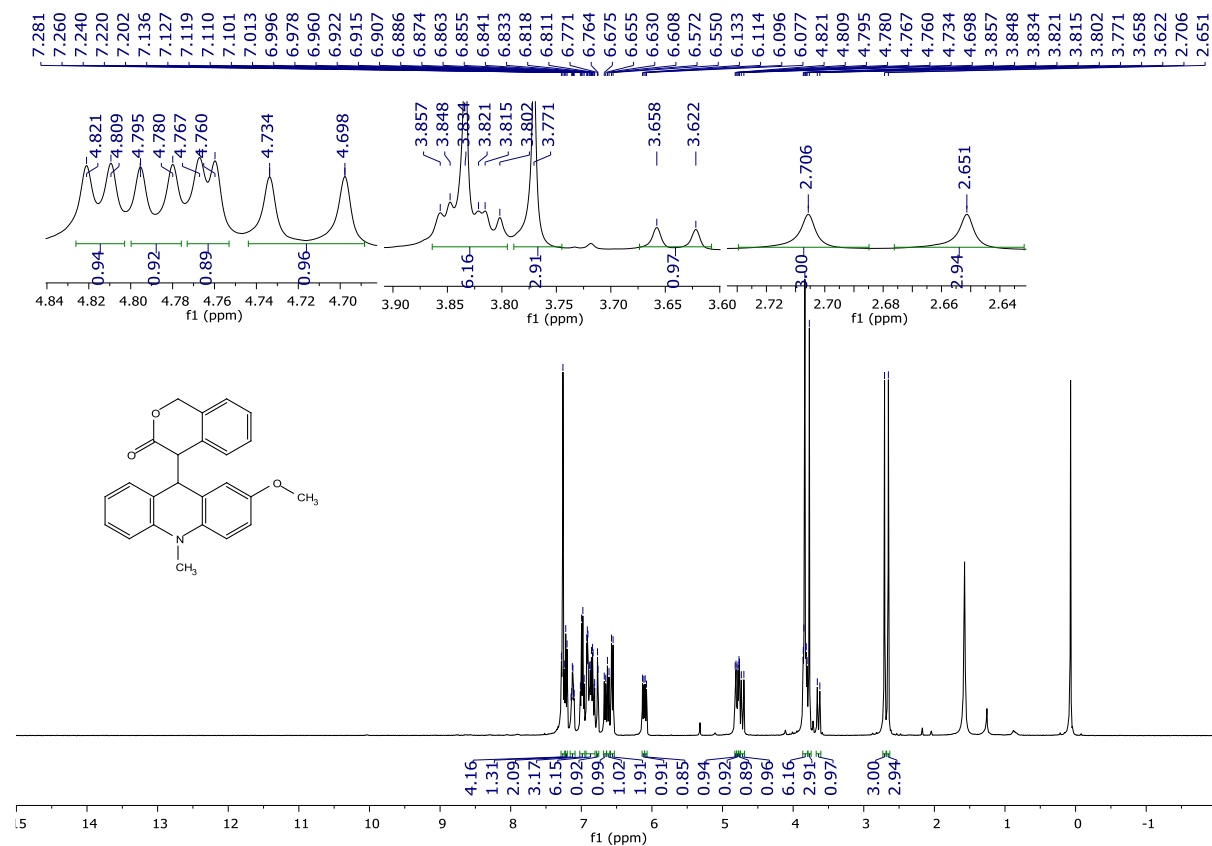

<sup>13</sup>C {<sup>1</sup>H} NMR of **5ma** (100 MHz, CDCl<sub>3</sub>):

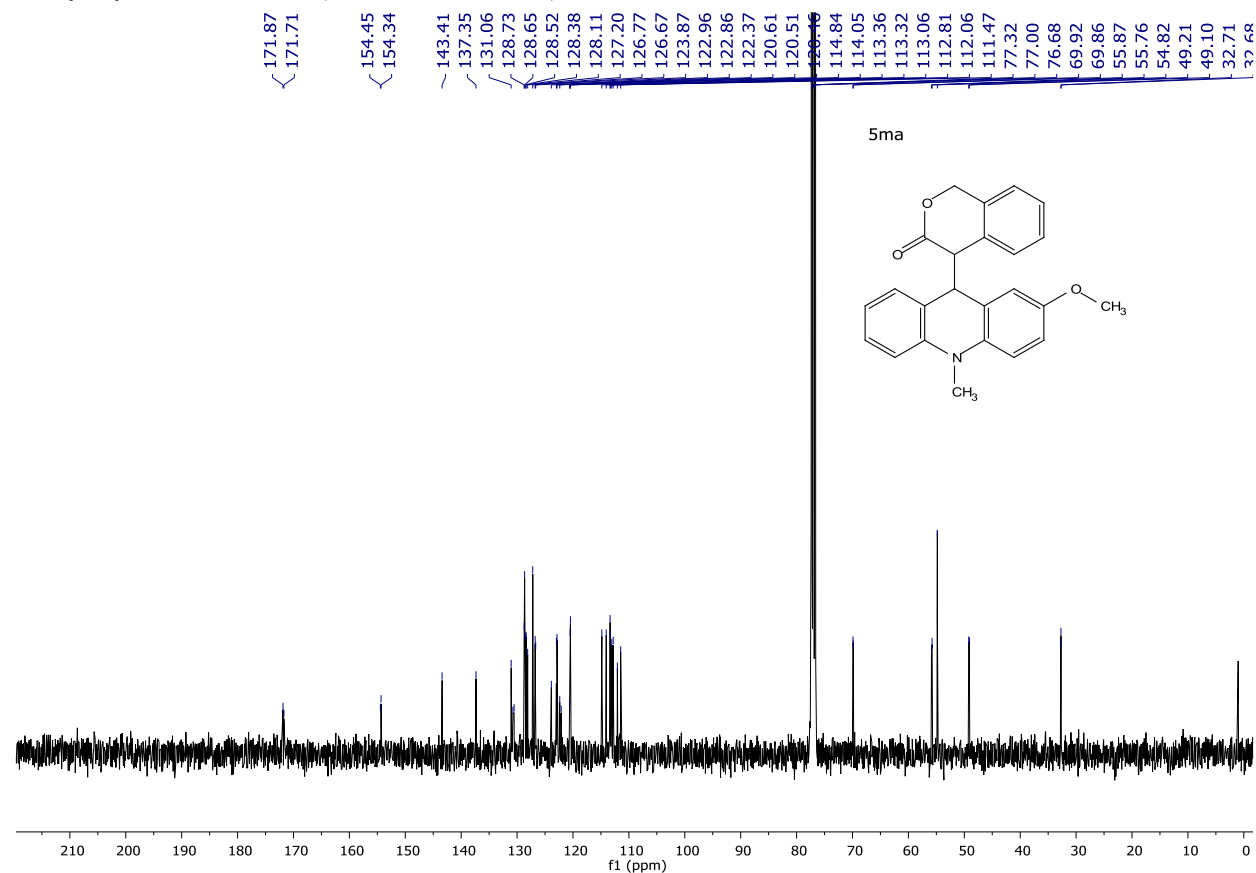

<sup>1</sup>H NMR of **6aa** (400 MHz, CDCl<sub>3</sub>):

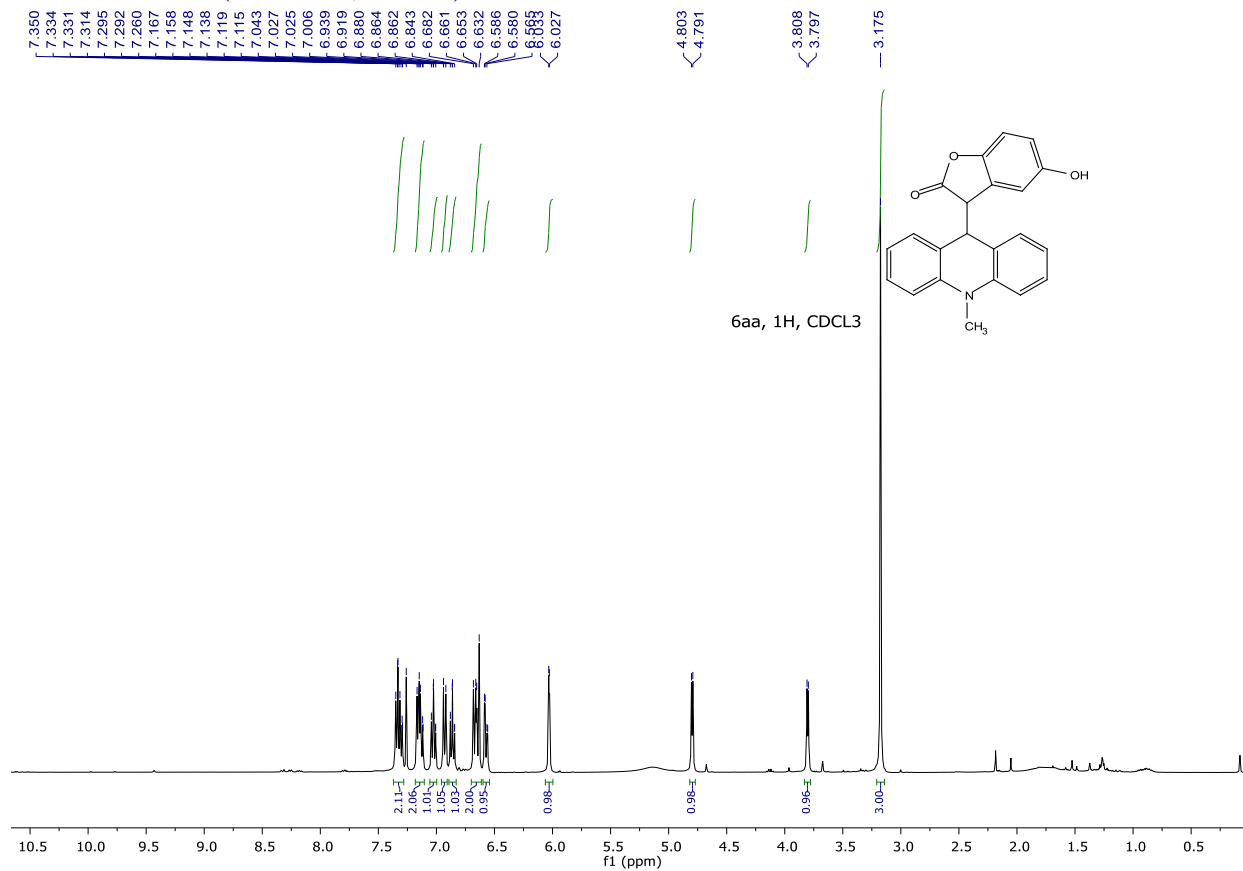

<sup>13</sup>C {<sup>1</sup>H} NMR of **6aa** (100 MHz, CDCl<sub>3</sub>):

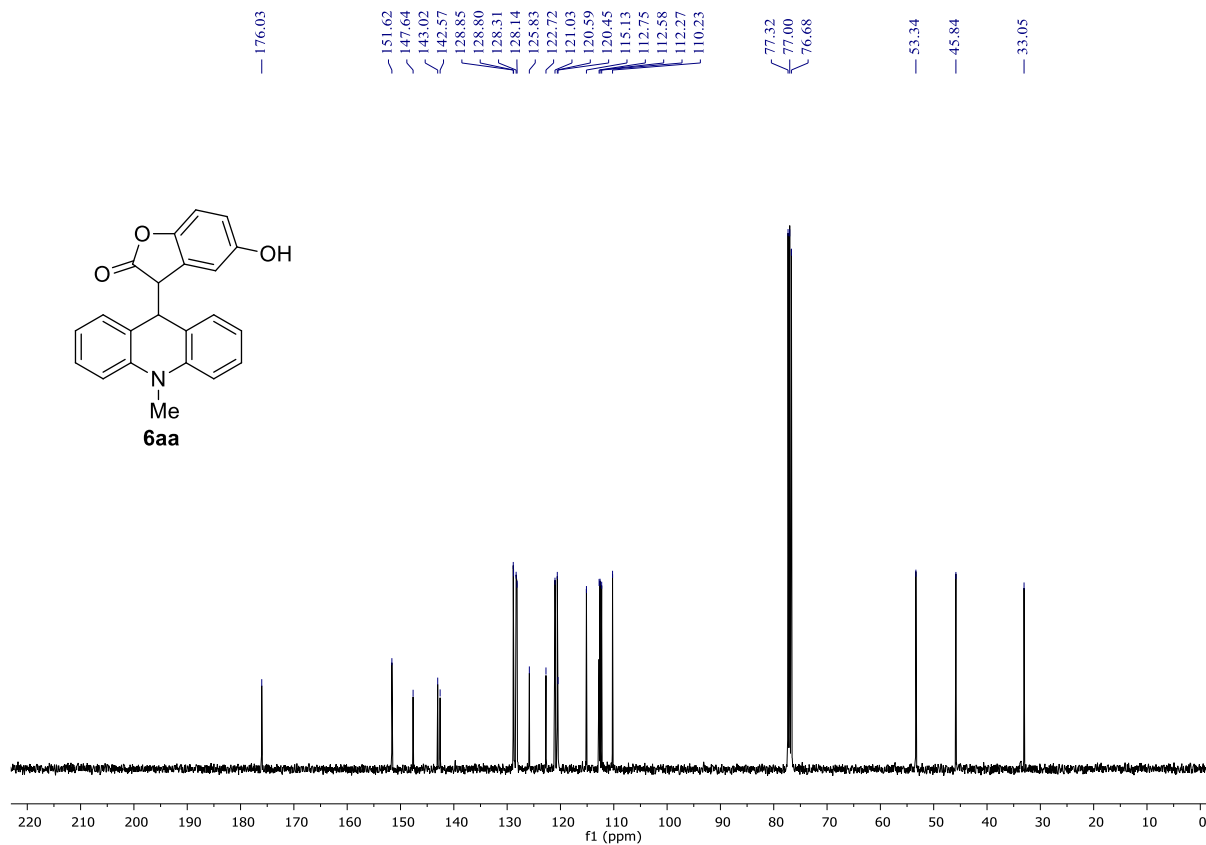

$^1\text{H}$  NMR of **6ab** (400 MHz,  $\text{CDCl}_3$ ):

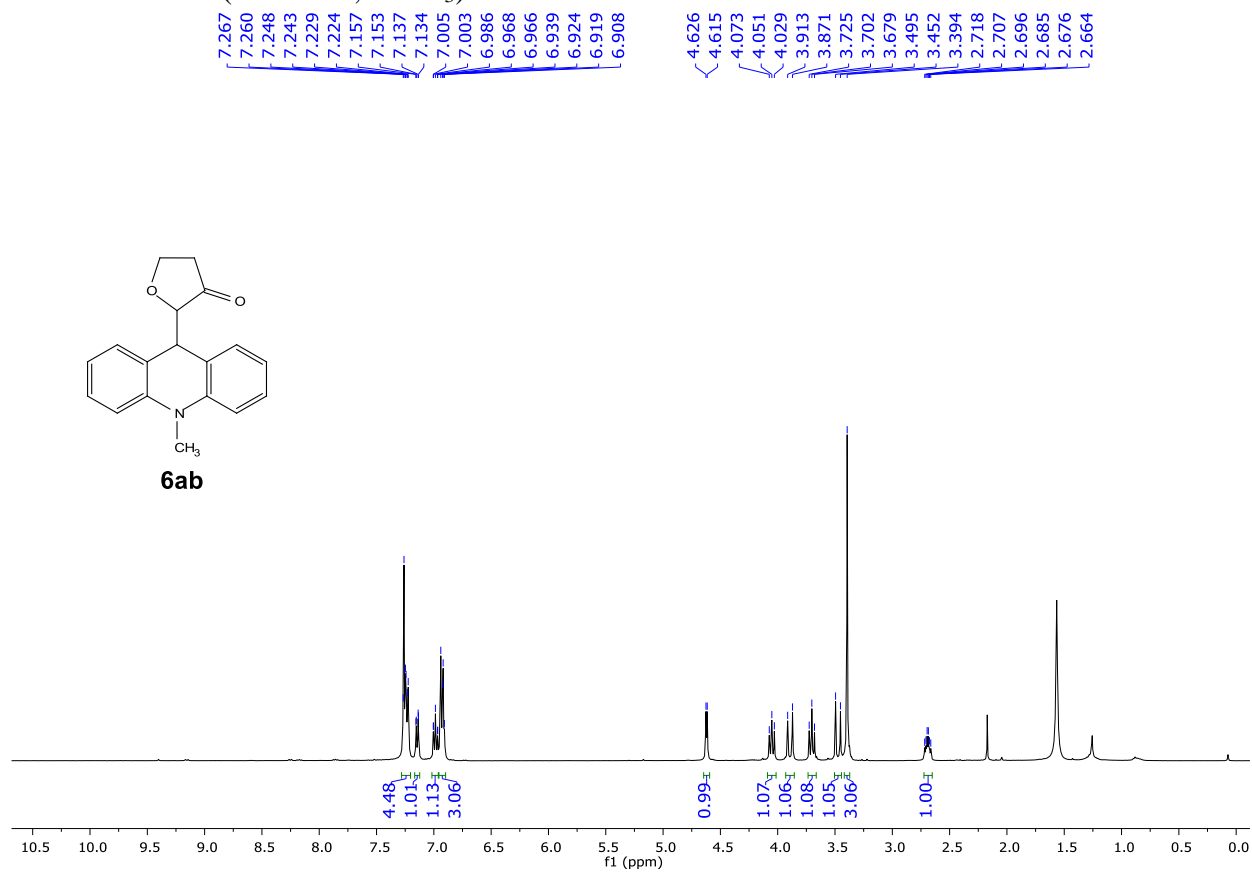

$^{13}\text{C}$   $\{^1\text{H}\}$  NMR of **6ab** (100 MHz,  $\text{CDCl}_3$ ):

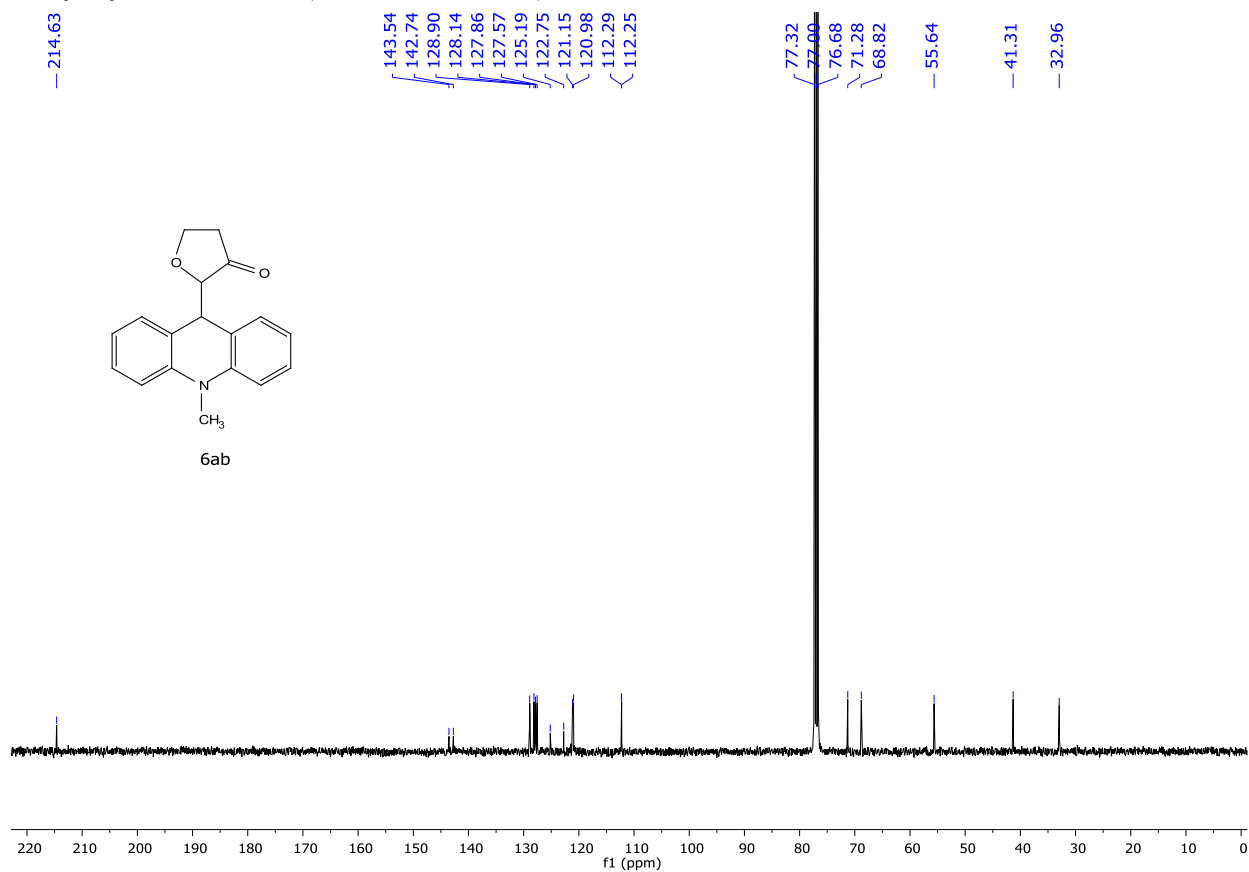

$^1\text{H}$  NMR of **6ac** (400 MHz,  $\text{CDCl}_3$ ):

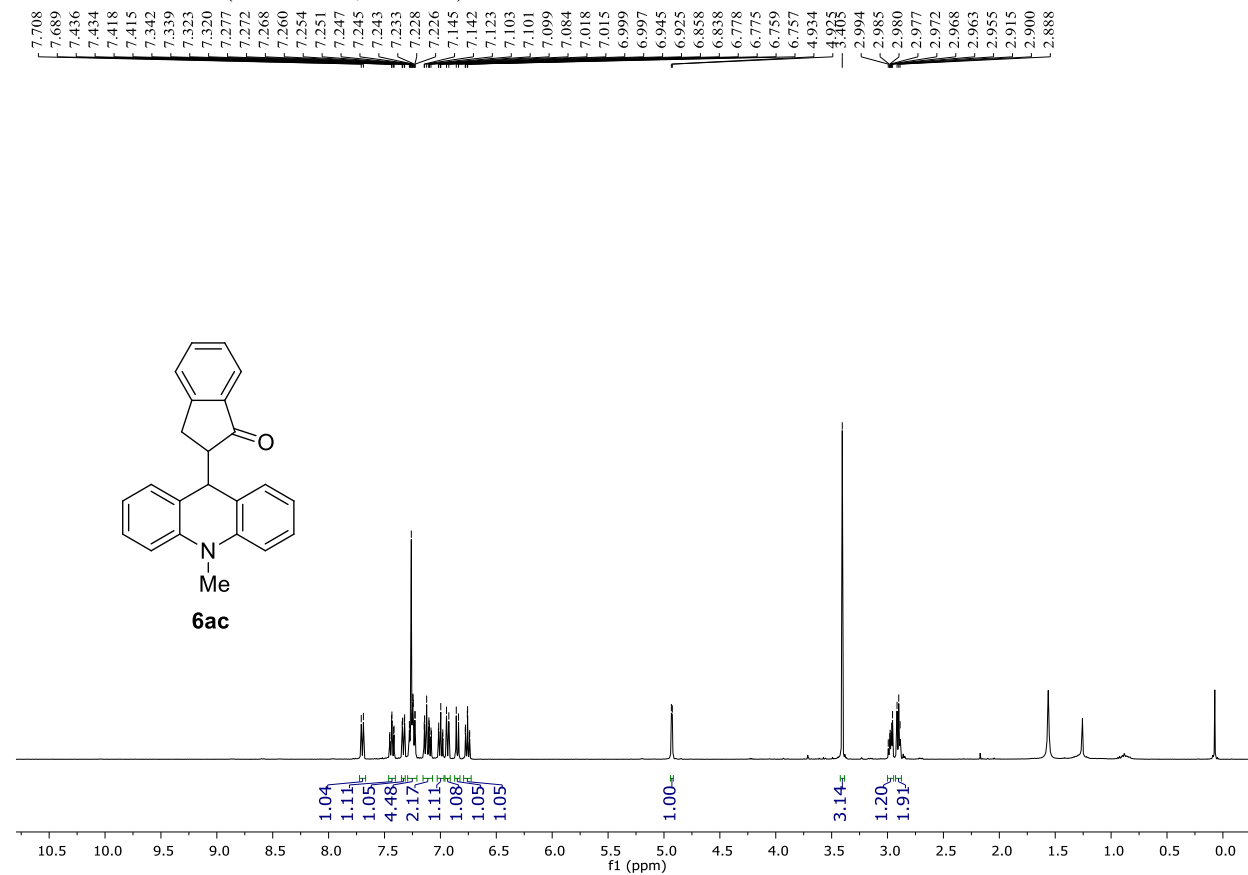

$^{13}\text{C}$  { $^1\text{H}$ } NMR of **6ac** (100 MHz,  $\text{CDCl}_3$ ):

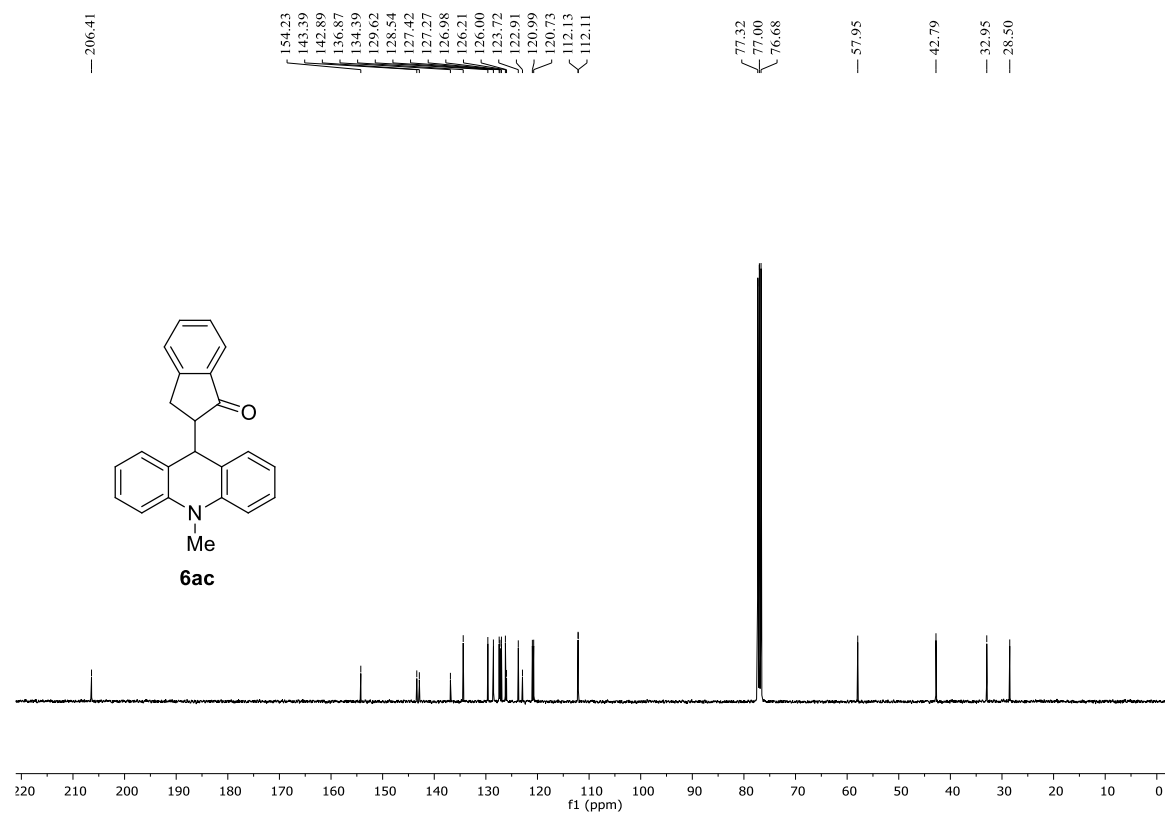

$^1\text{H}$  NMR of **6ad** (400 MHz,  $\text{CDCl}_3$ ):

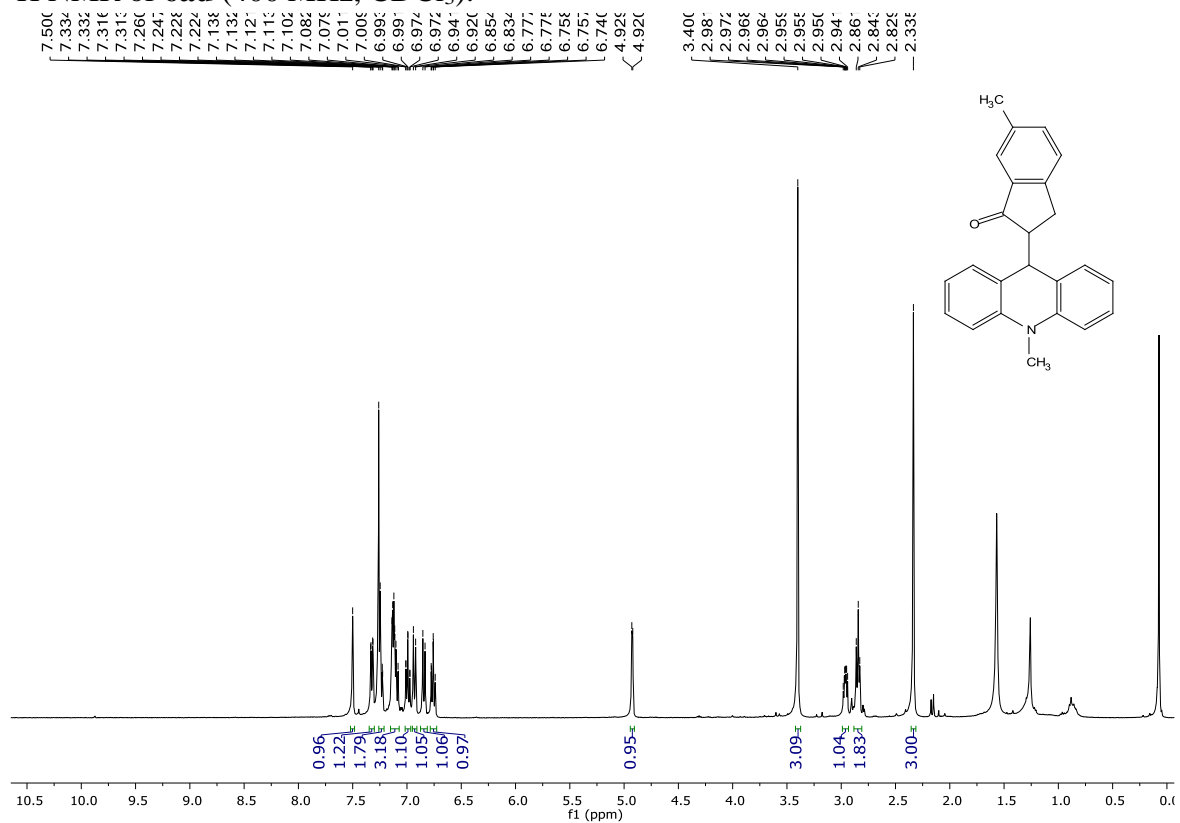

$^{13}\text{C}$   $\{^1\text{H}\}$  NMR of **6ad** (100 MHz,  $\text{CDCl}_3$ ):

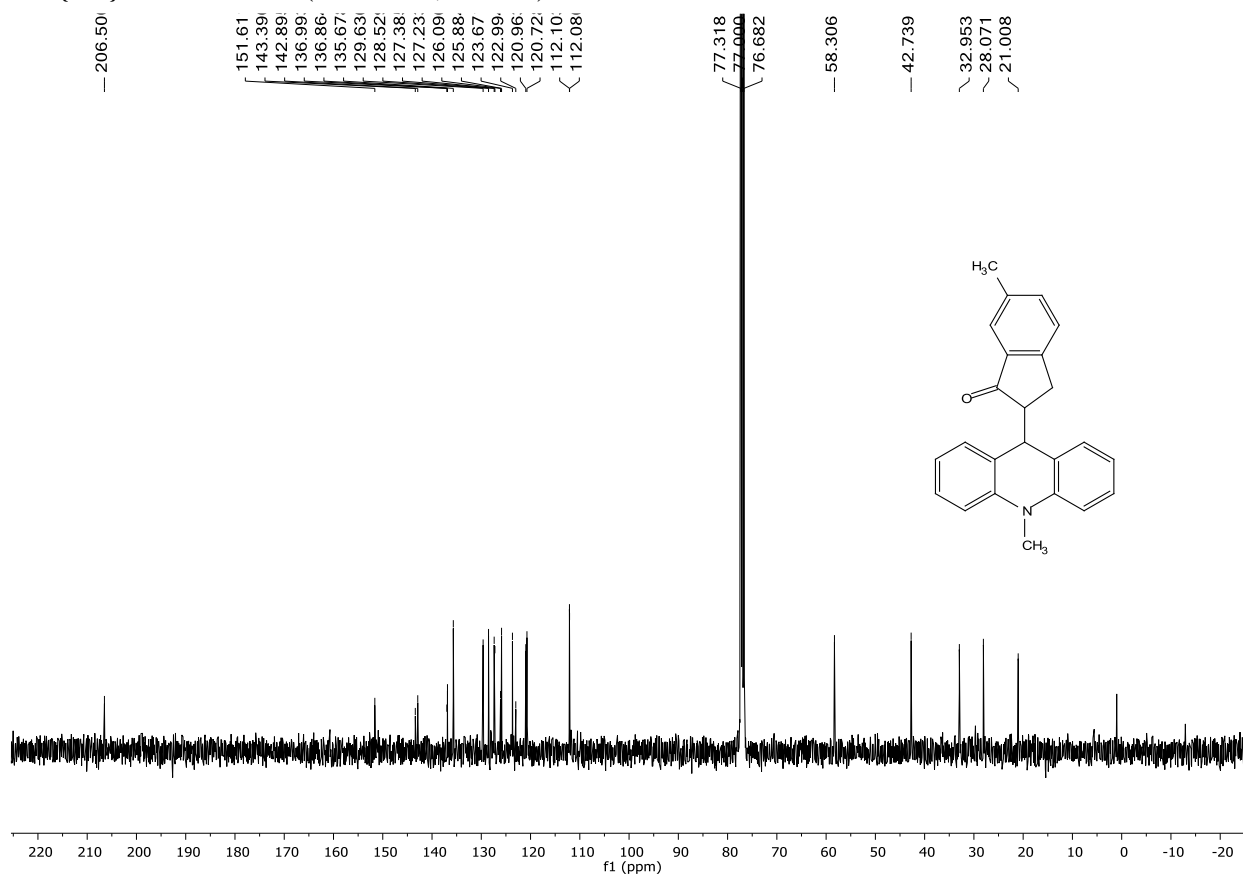

$^1\text{H}$  NMR of **6ae** (400 MHz,  $\text{CDCl}_3$ ):

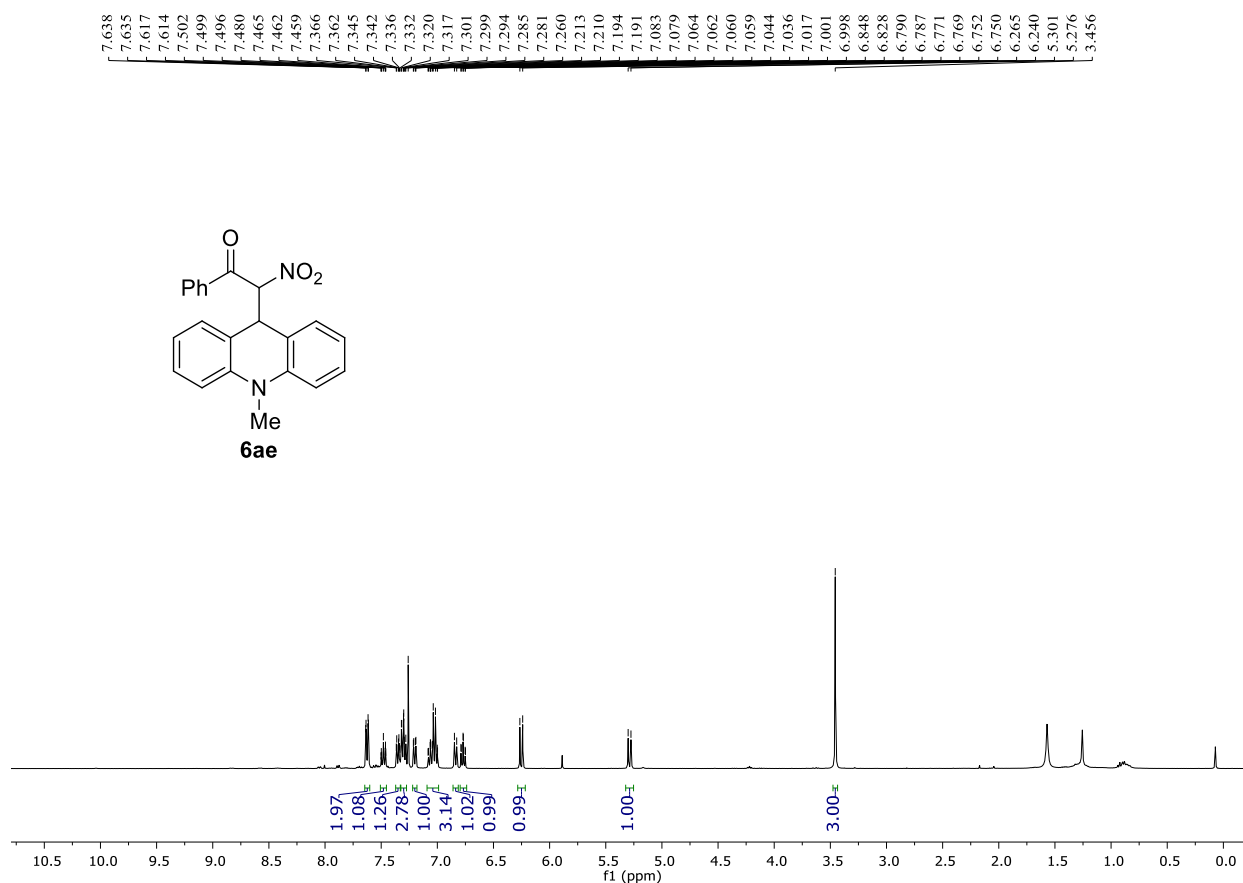

$^{13}\text{C}$   $\{^1\text{H}\}$  NMR of **6ae** (100 MHz,  $\text{CDCl}_3$ ):

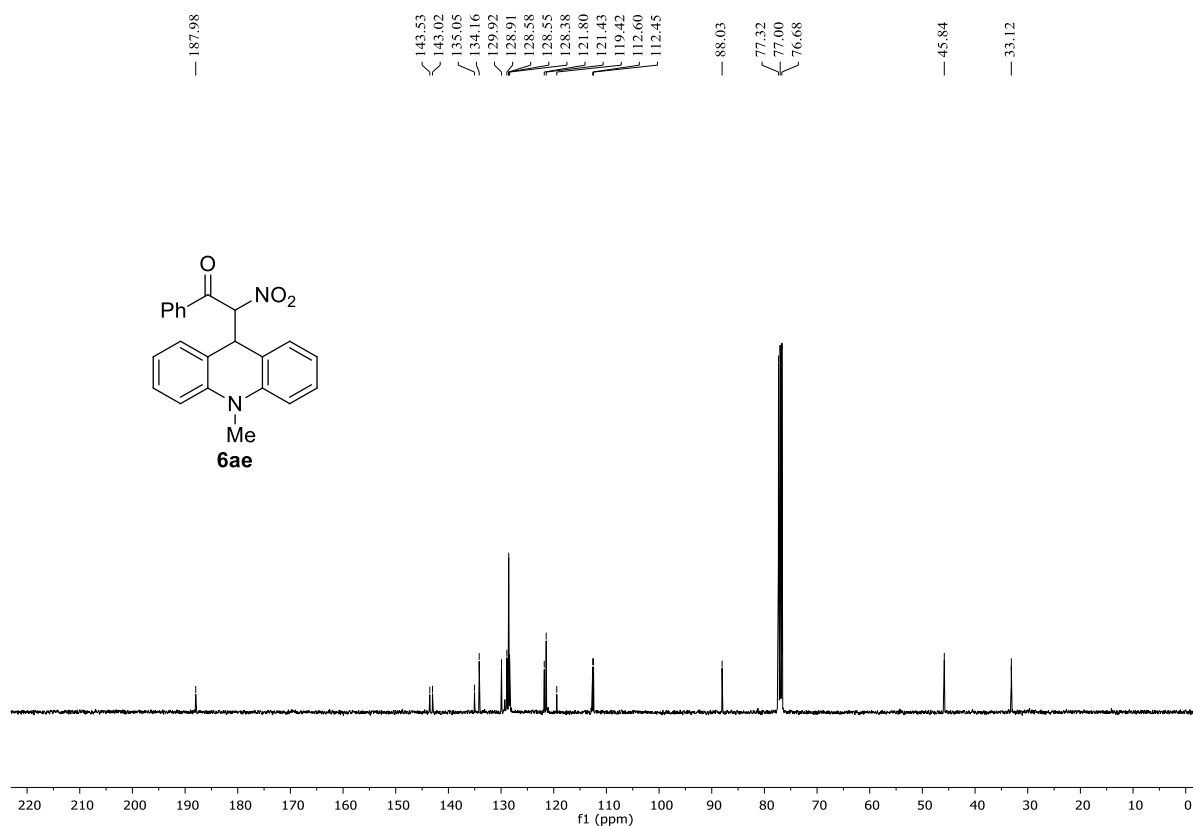

$^1\text{H}$  NMR of **6af** (400 MHz,  $\text{CDCl}_3$ ):

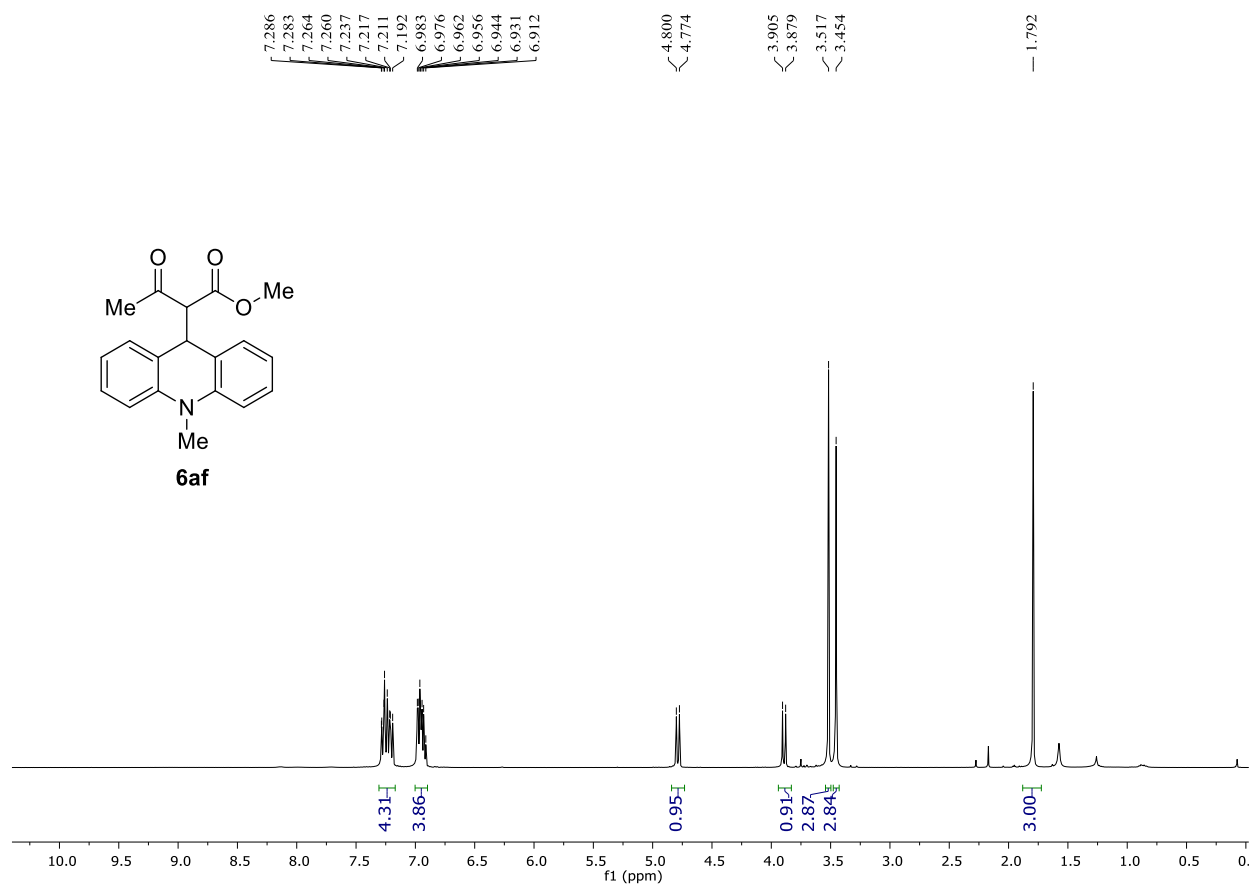

$^{13}\text{C}$  { $^1\text{H}$ } NMR of **6af** (100 MHz,  $\text{CDCl}_3$ ):

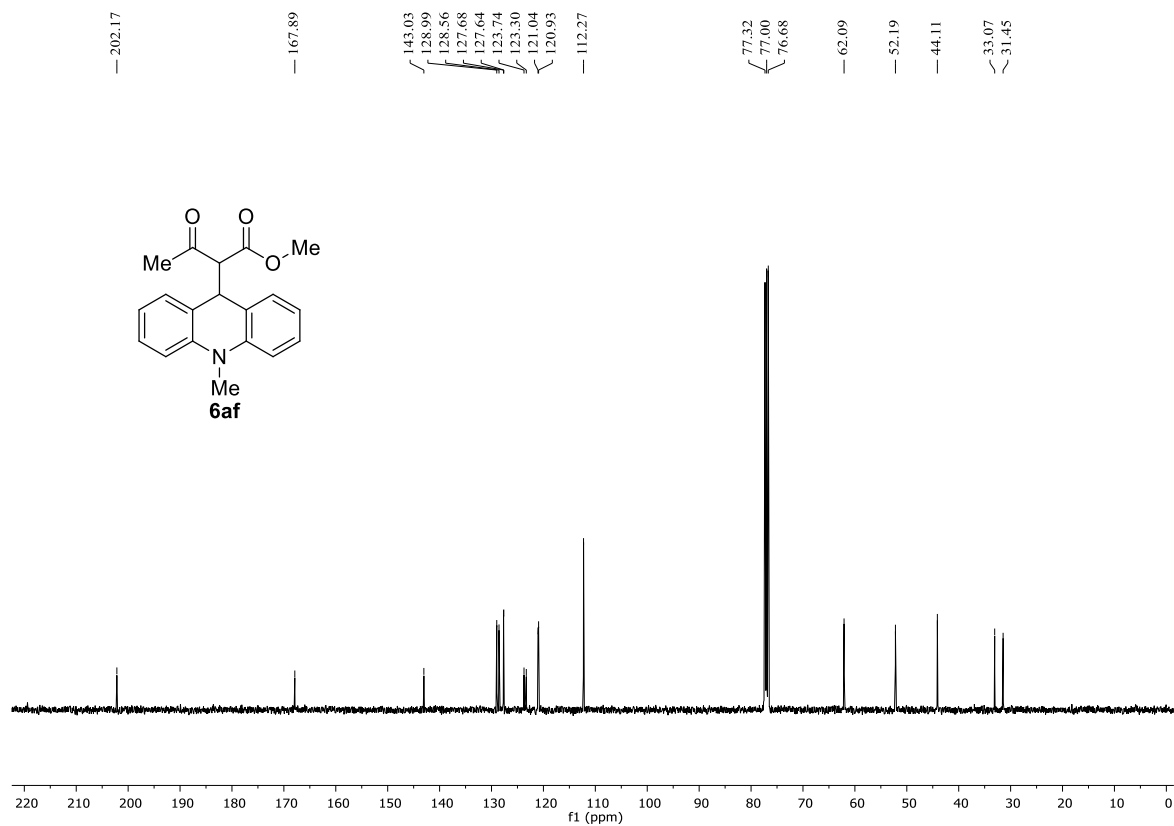



$^1\text{H}$  NMR of **6ag** (400 MHz,  $\text{CDCl}_3$ ):

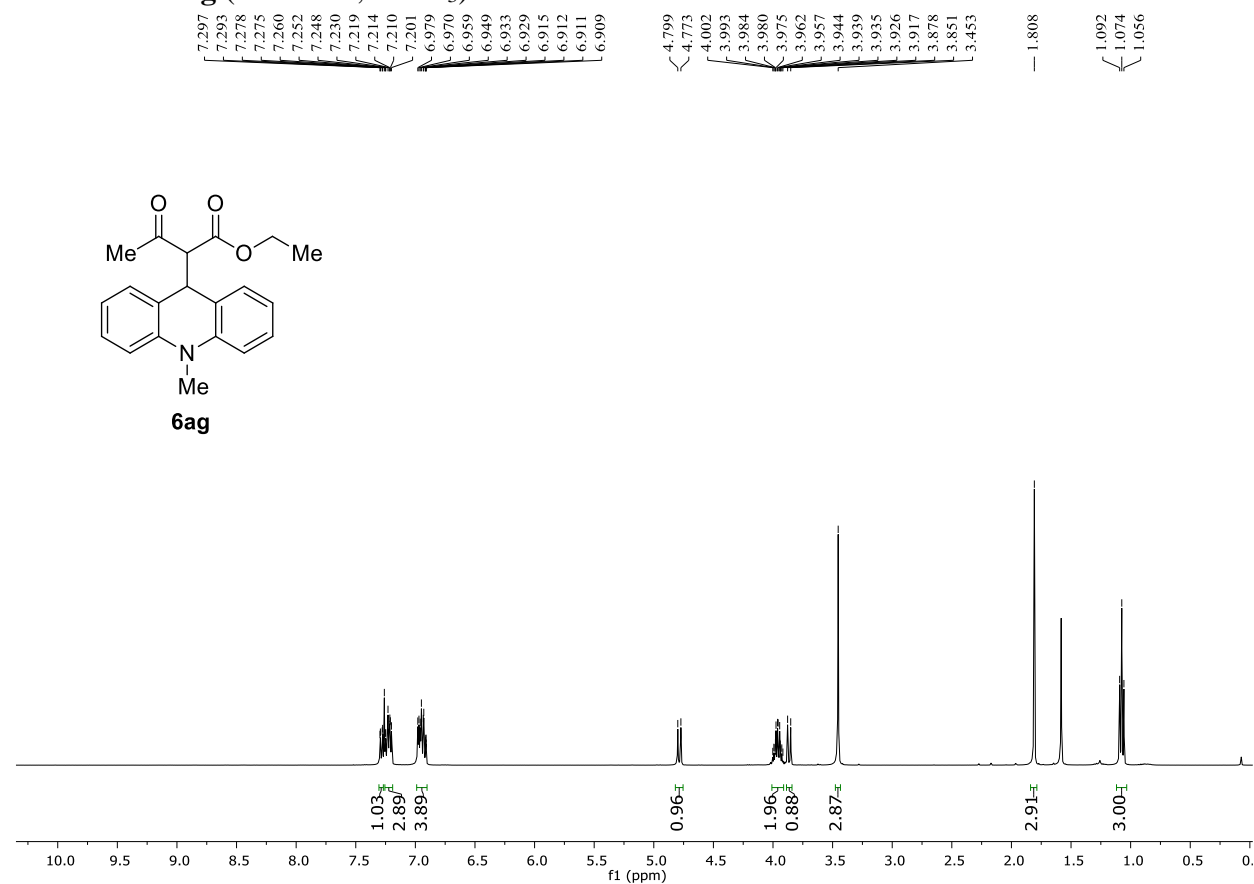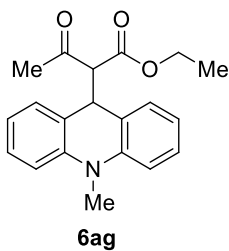

$^{13}\text{C}$   $\{^1\text{H}\}$  NMR of **6ag** (100 MHz,  $\text{CDCl}_3$ ):

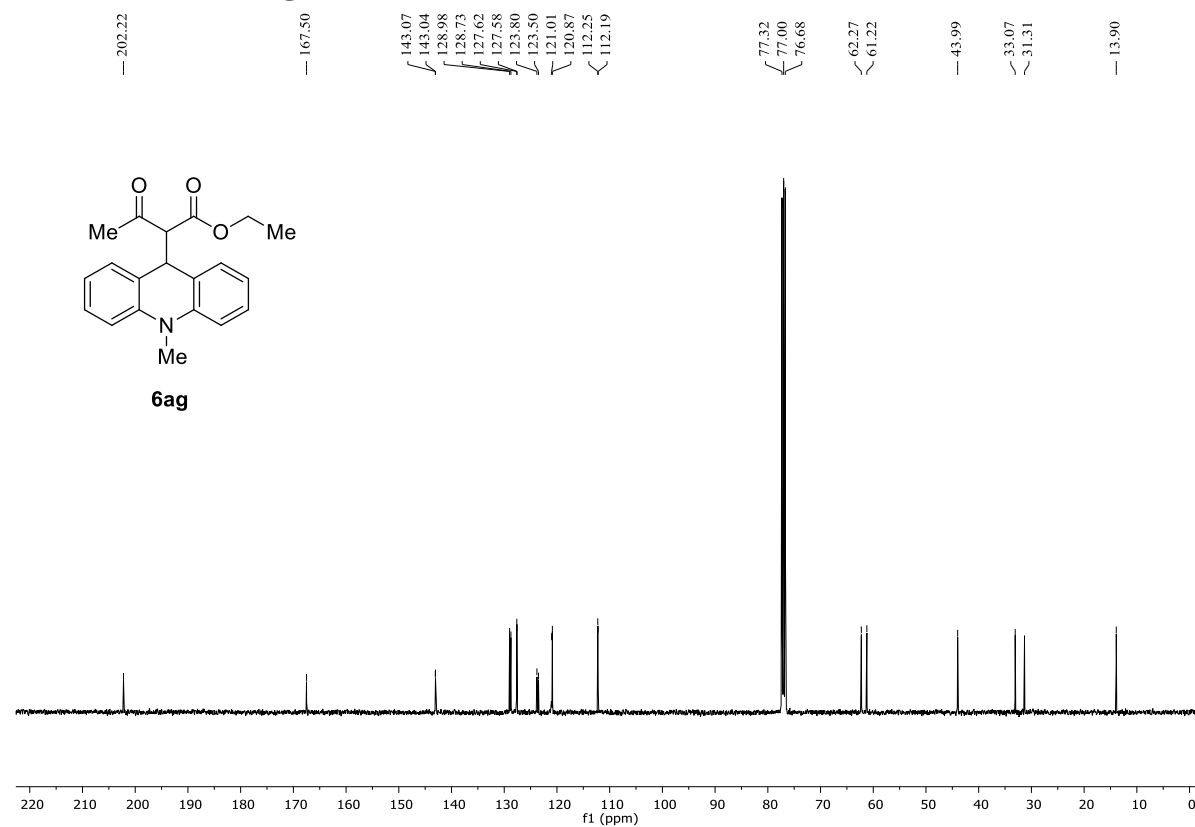

$^1\text{H}$  NMR of **6ah** (400 MHz,  $\text{CDCl}_3$ ):

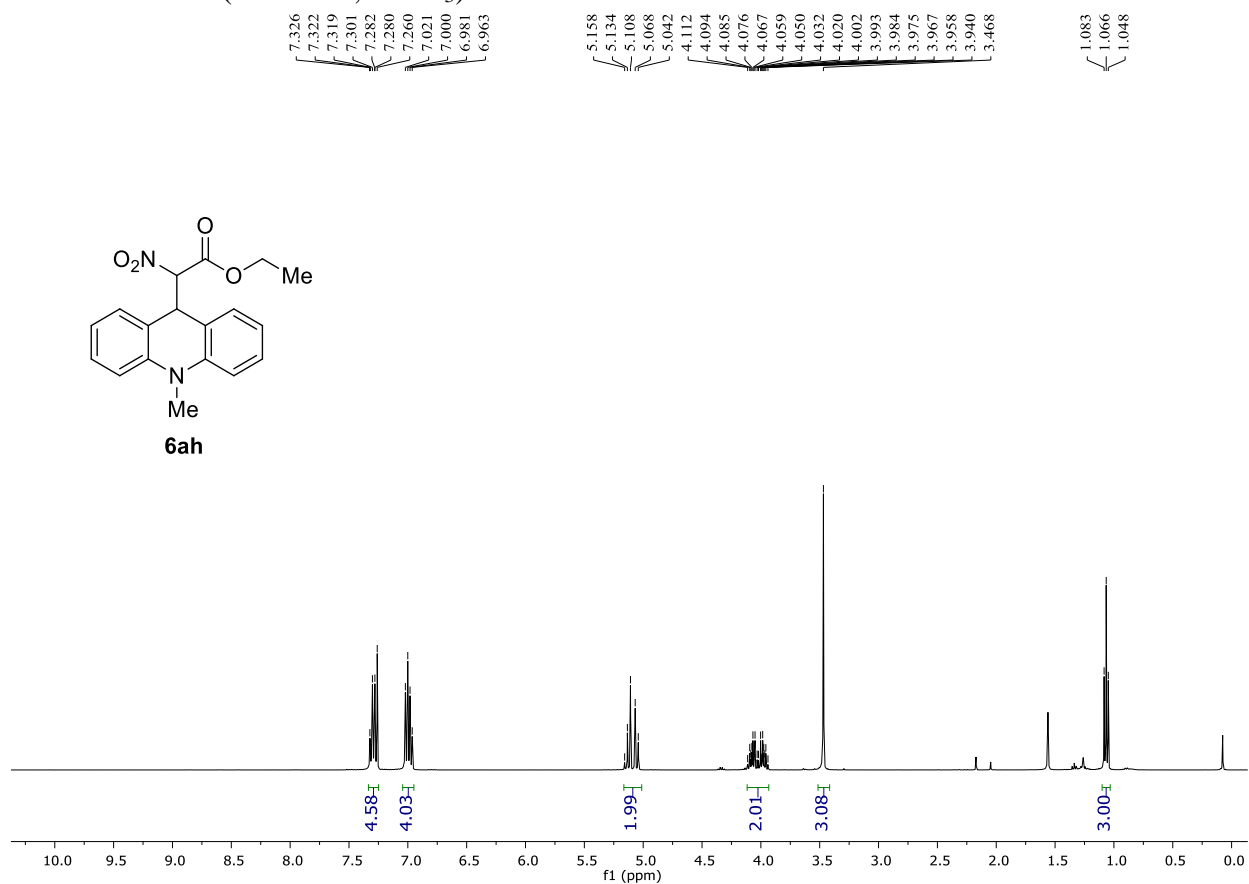

$^{13}\text{C}$   $\{^1\text{H}\}$  NMR of **6ah** (100 MHz,  $\text{CDCl}_3$ ):

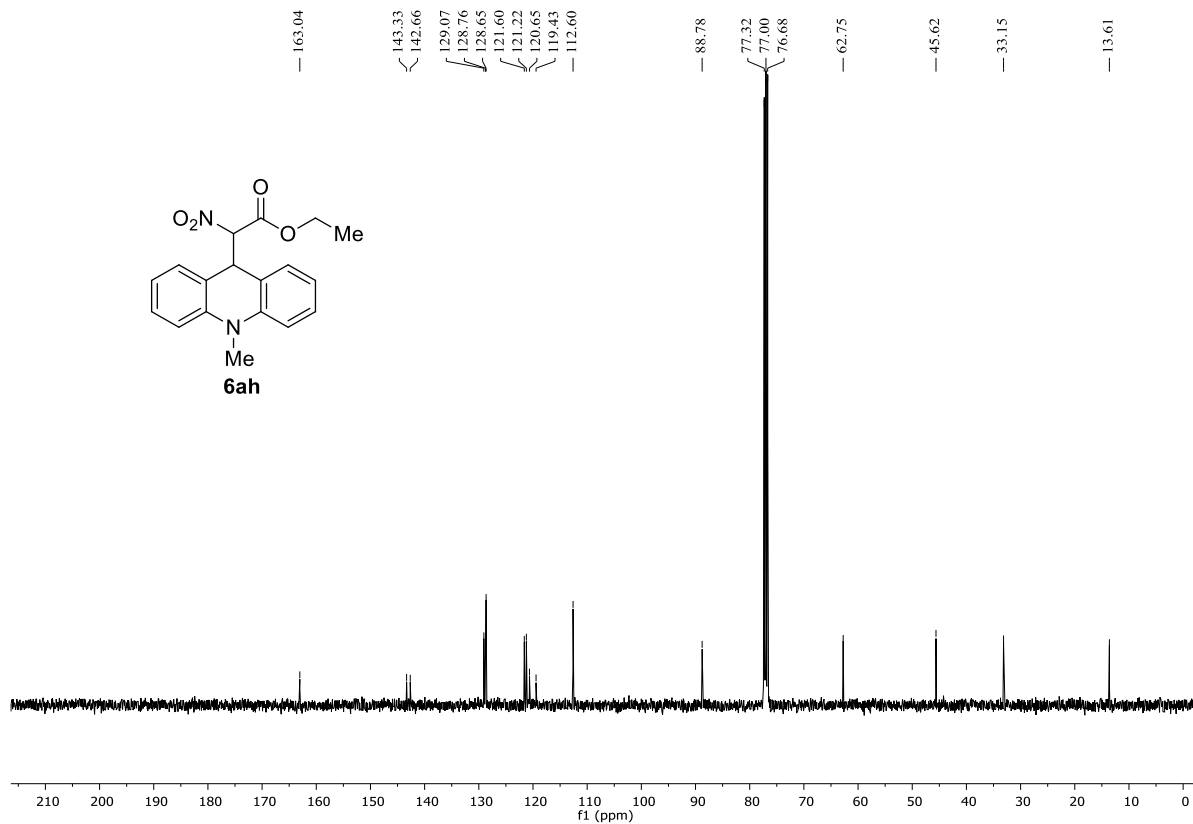

$^1\text{H}$  NMR of **6ai** (400 MHz,  $\text{CDCl}_3$ ):

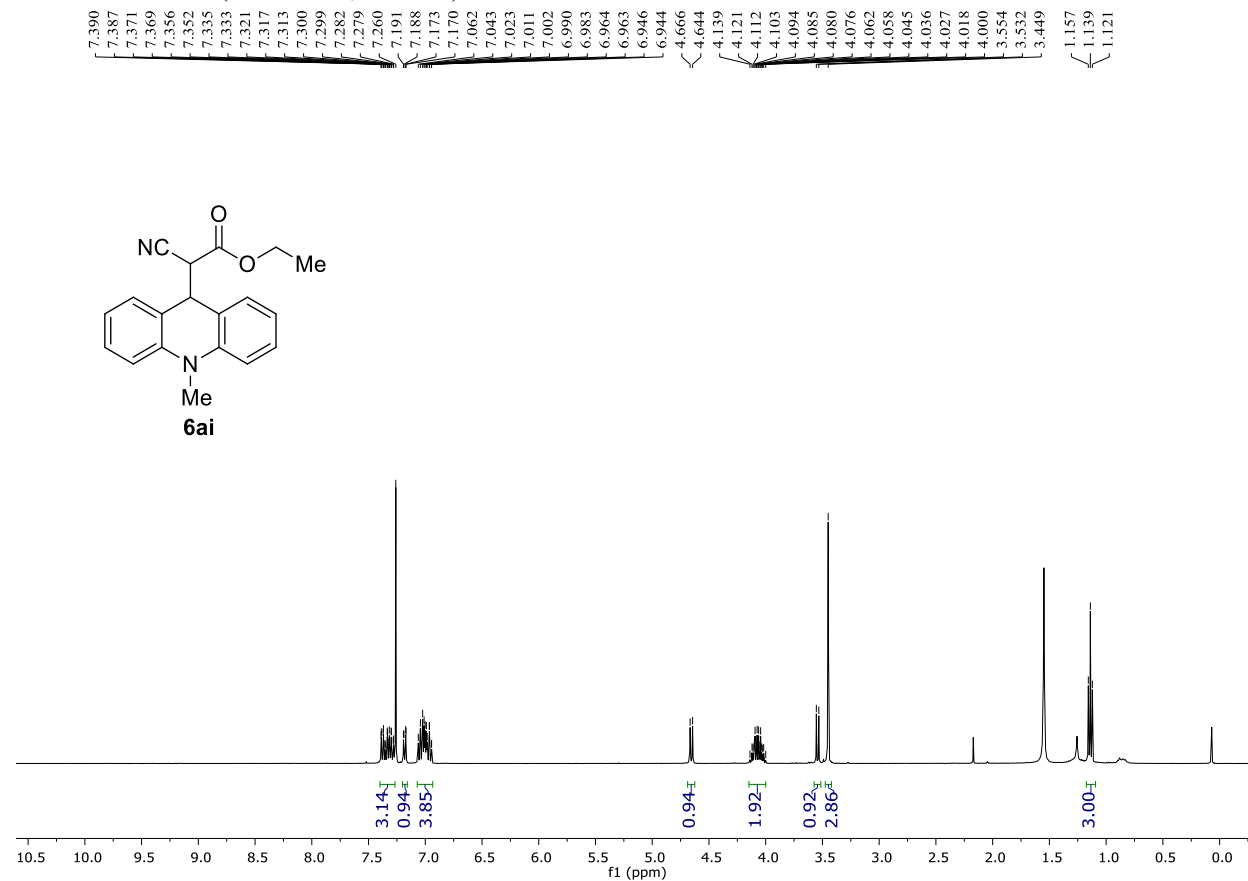

$^{13}\text{C}$  { $^1\text{H}$ } NMR of **6ai** (100 MHz,  $\text{CDCl}_3$ ):

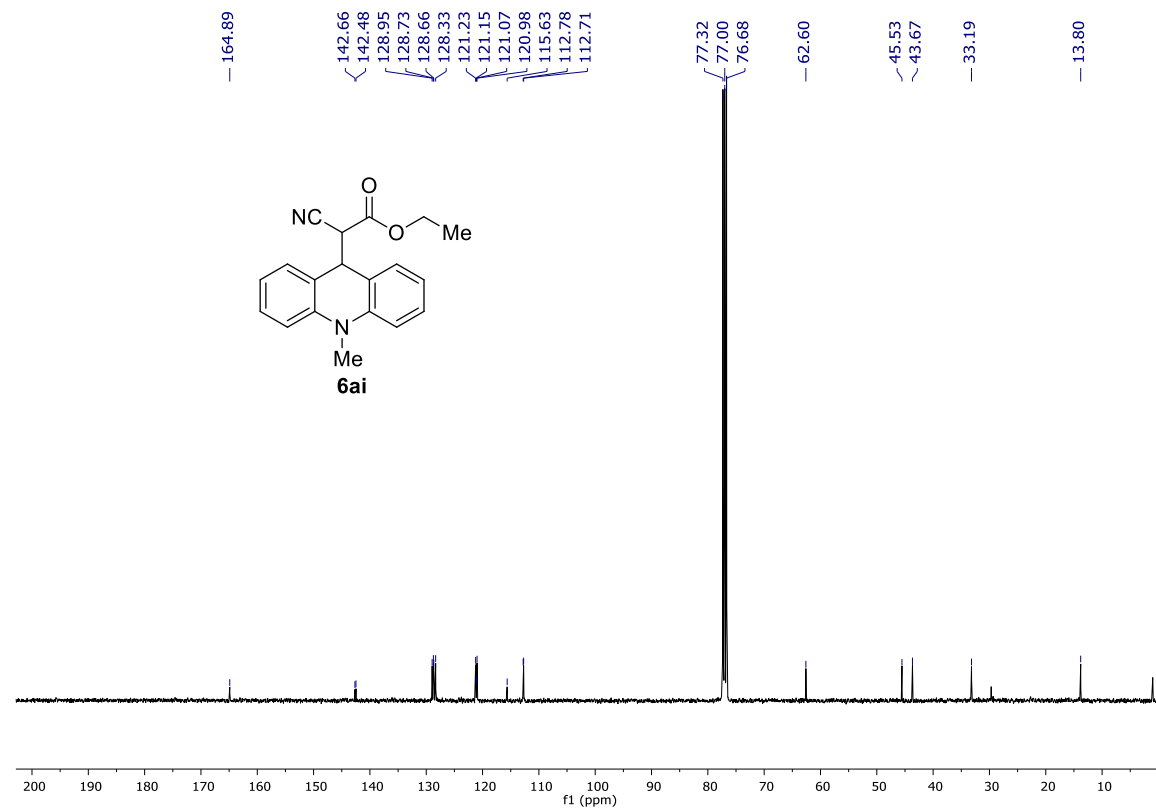

$^1\text{H}$  NMR of **6aj** (400 MHz,  $\text{CDCl}_3$ ):

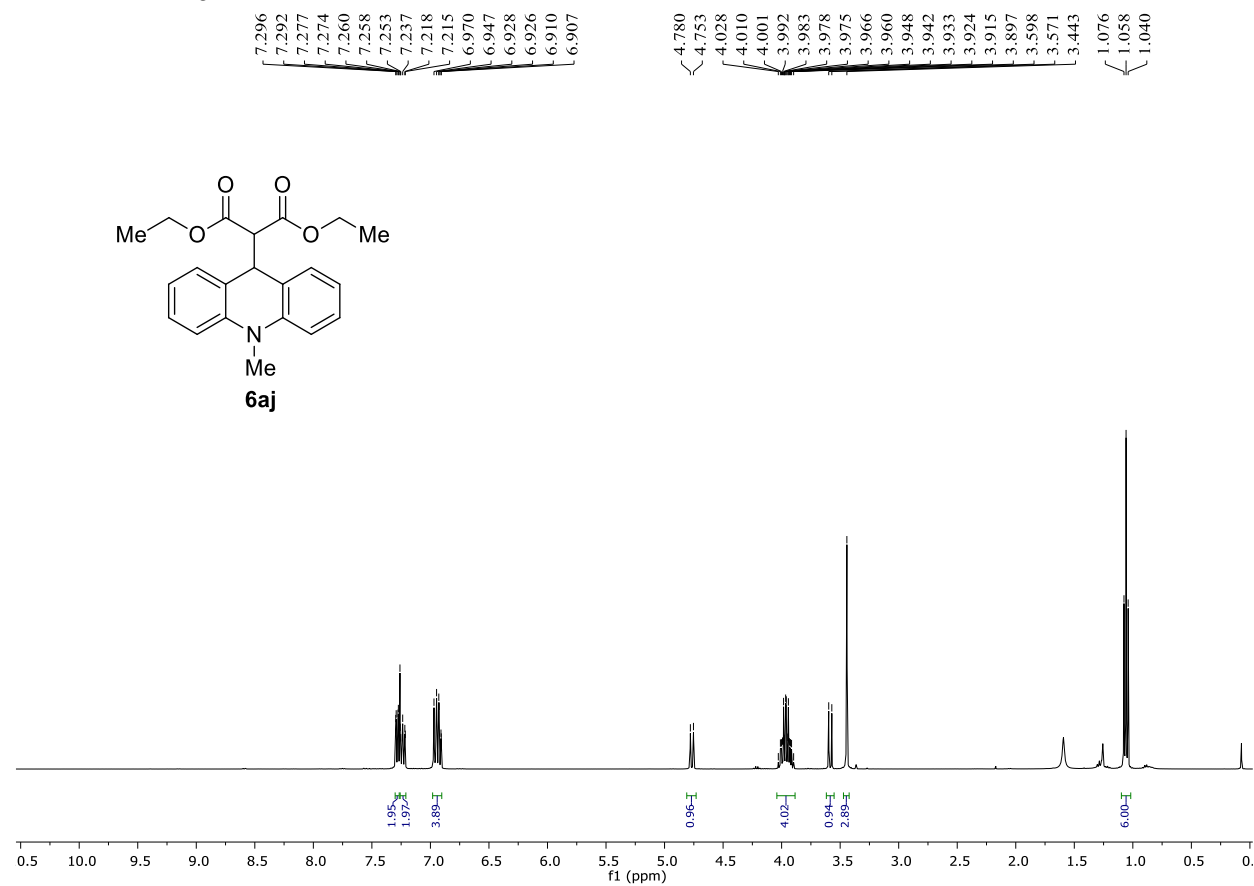

$^{13}\text{C}$  { $^1\text{H}$ } NMR of **6aj** (100 MHz,  $\text{CDCl}_3$ ):

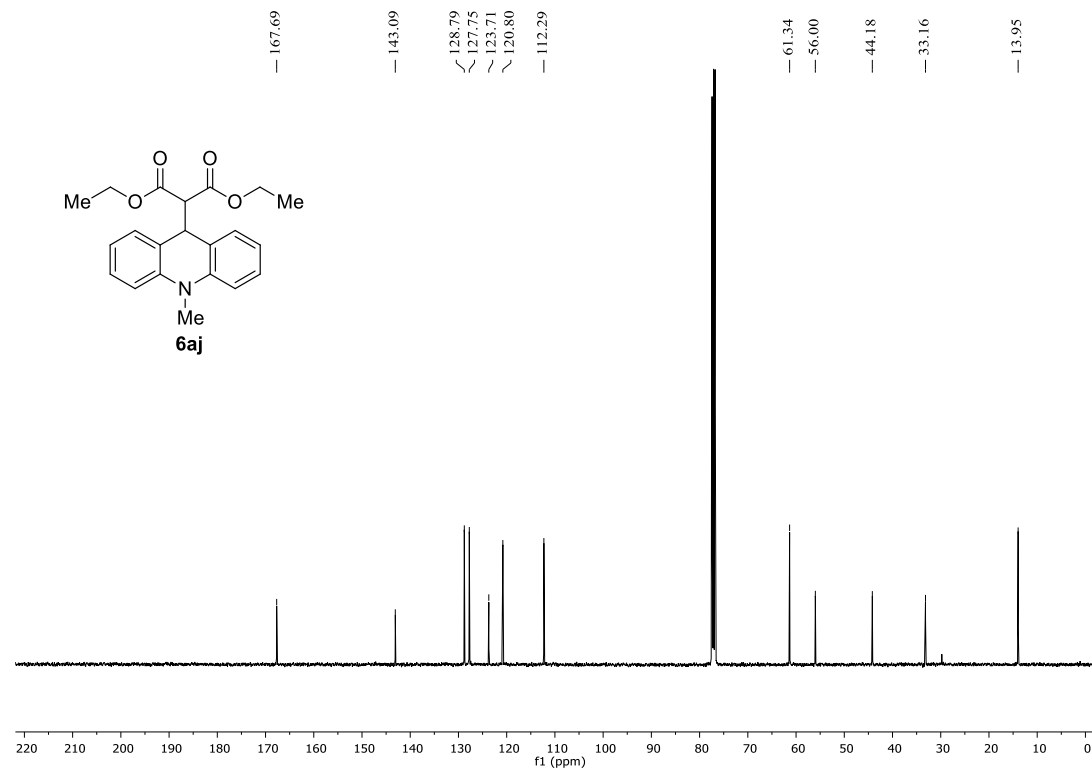

$^1\text{H}$  NMR of **7** (400 MHz,  $\text{CDCl}_3$ ):

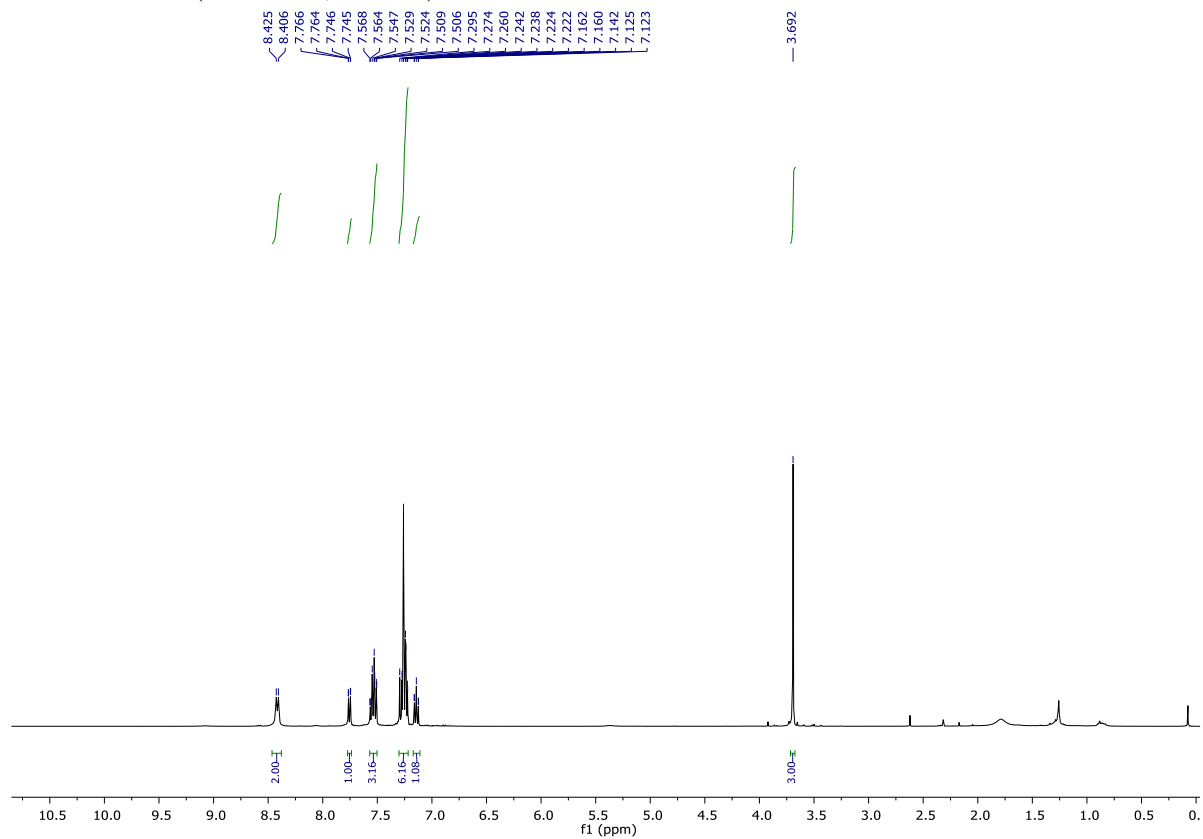

$^{13}\text{C}$   $\{^1\text{H}\}$  NMR of **7** (100 MHz,  $\text{CDCl}_3$ ):

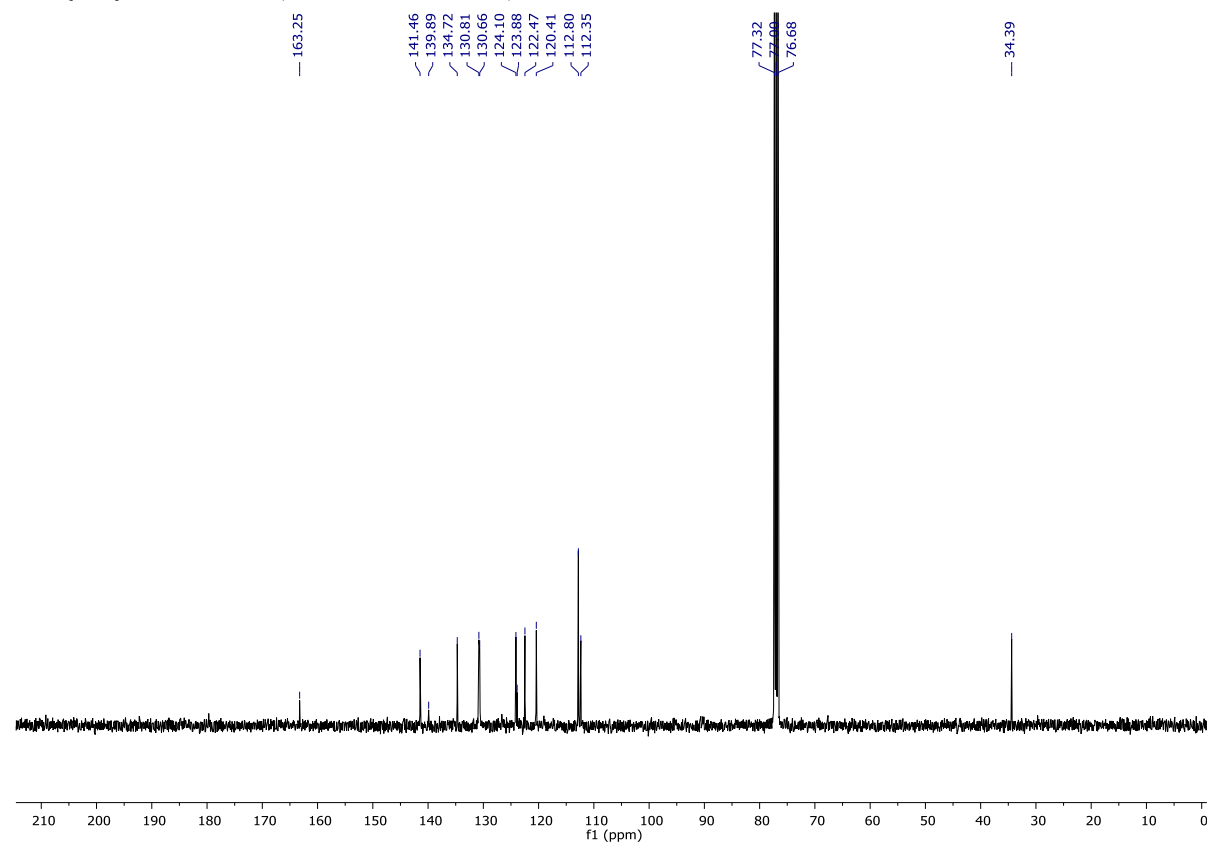

$^1\text{H}$  NMR of **1a-d<sub>2</sub>** (400 MHz,  $\text{CDCl}_3$ ):

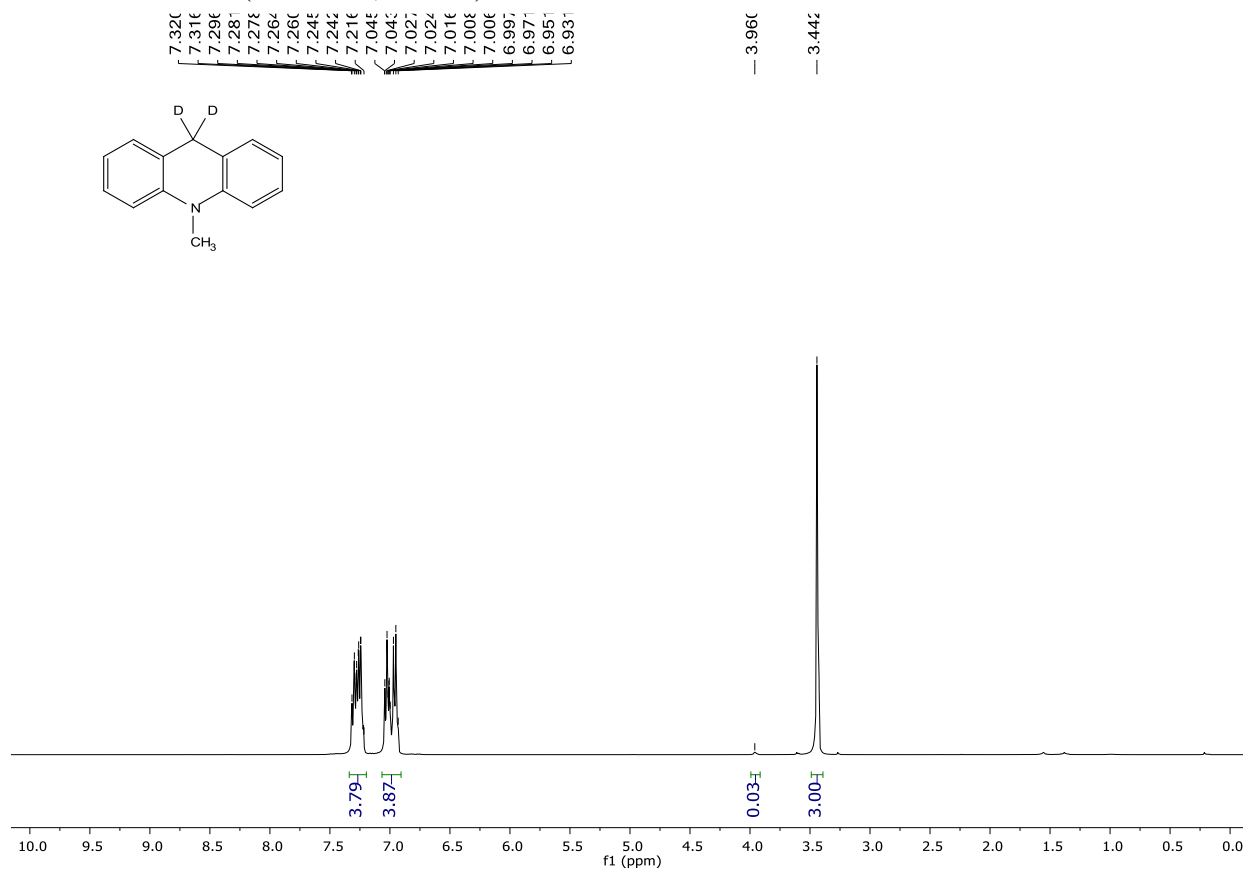

$^{13}\text{C}$   $\{^1\text{H}\}$  NMR of **1a-d<sub>2</sub>** (100 MHz,  $\text{CDCl}_3$ ):

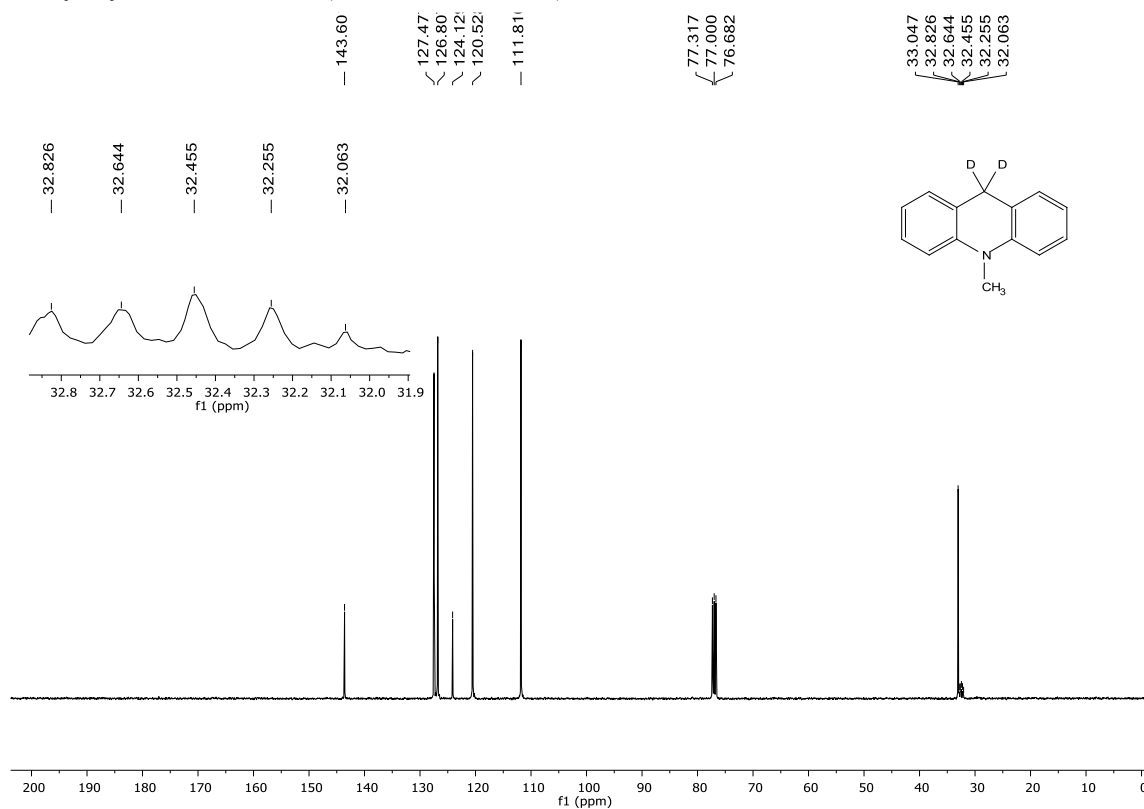

<sup>1</sup>H NMR of **3aa-d<sub>1</sub>** (400 MHz, CDCl<sub>3</sub>):

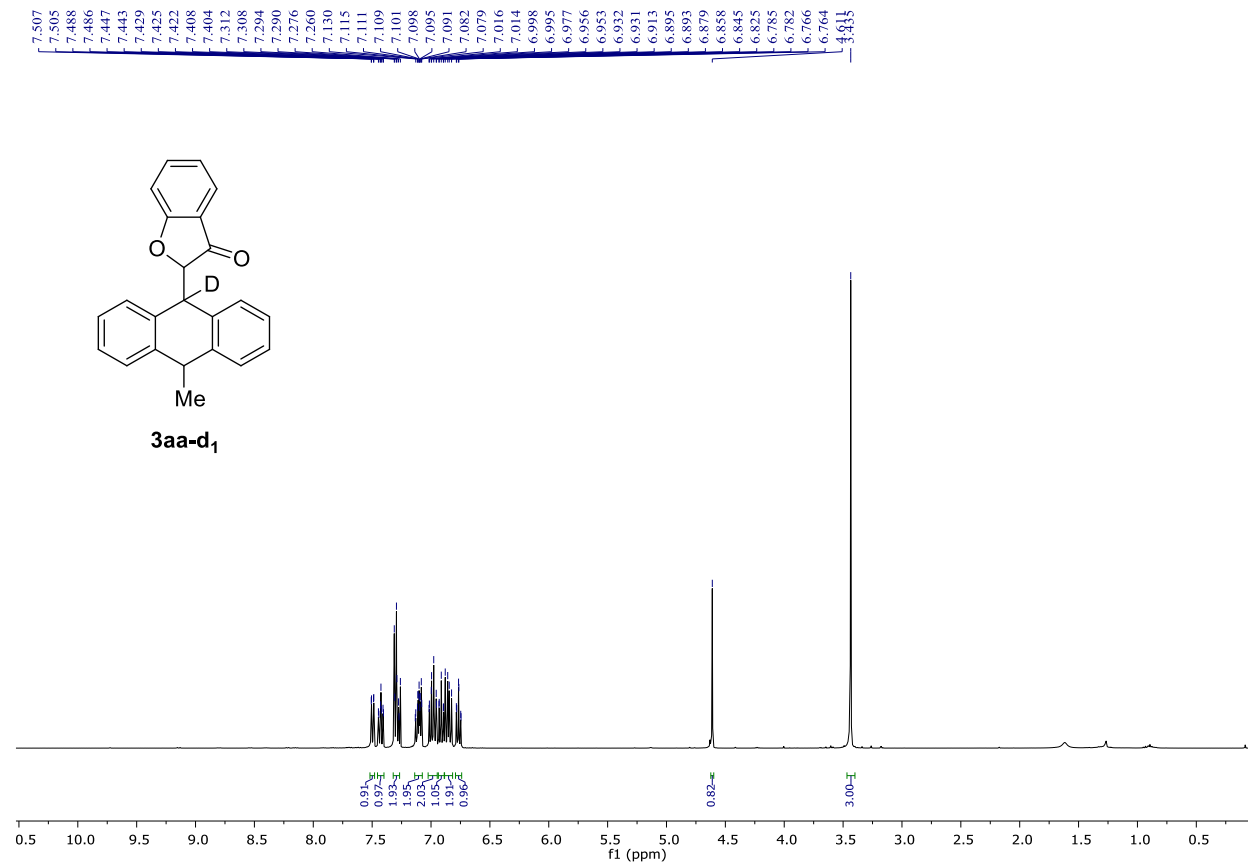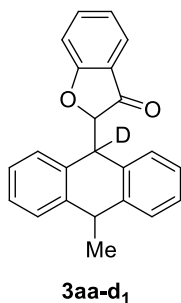

<sup>13</sup>C {<sup>1</sup>H} NMR of **3aa-d<sub>1</sub>** (100 MHz, CDCl<sub>3</sub>):

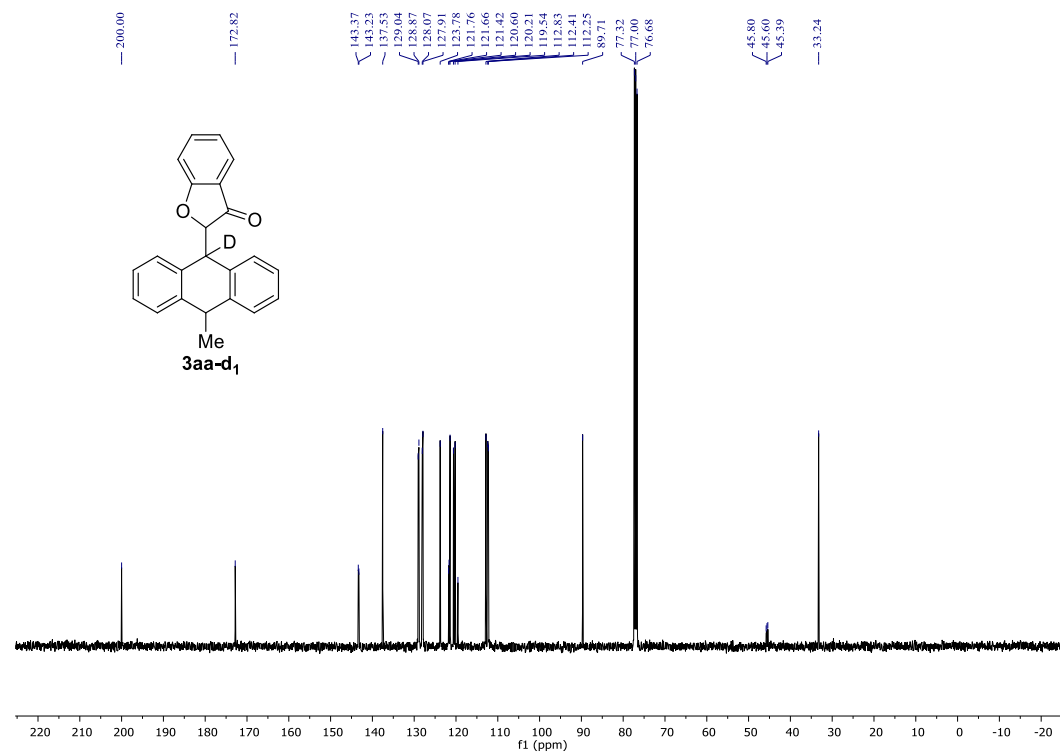

<sup>1</sup>H NMR of **8** (400 MHz, CDCl<sub>3</sub>):

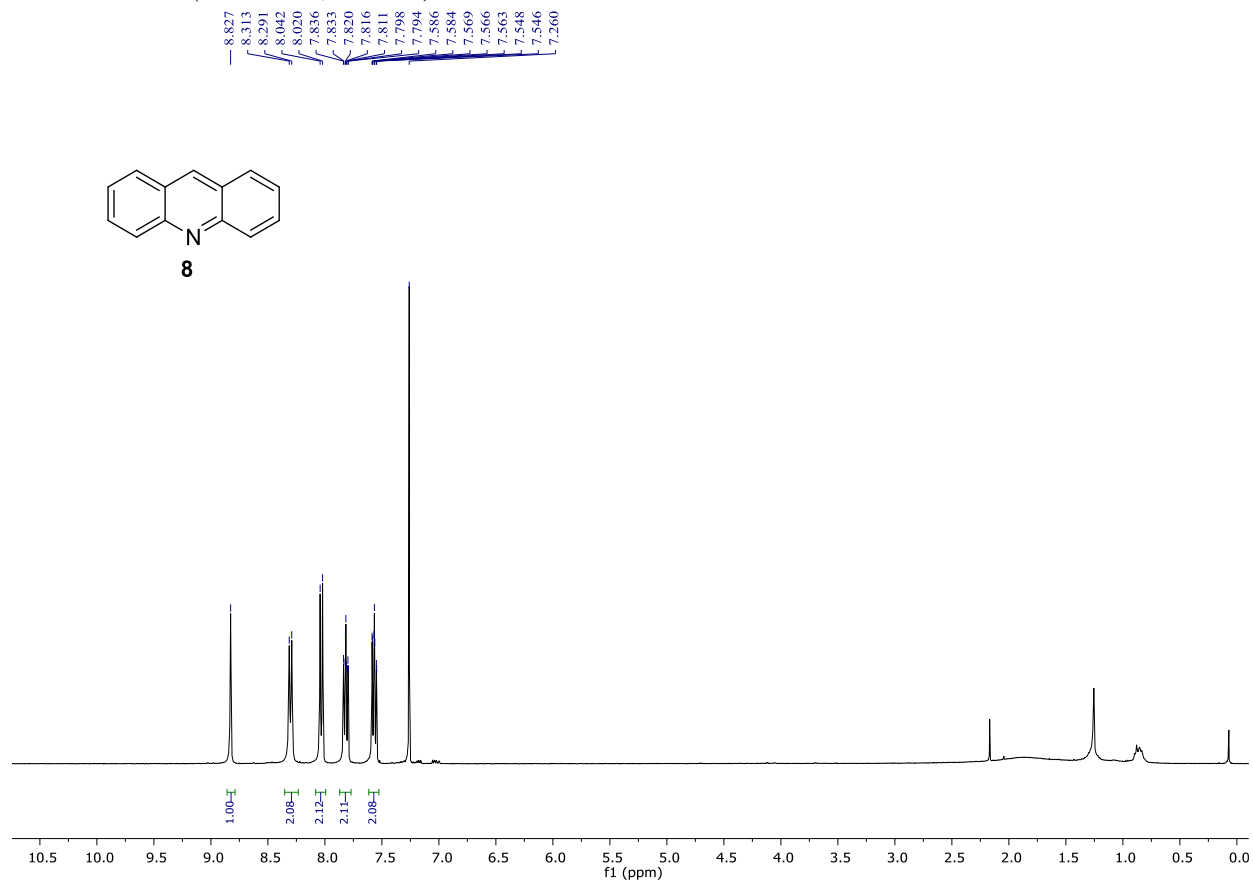



$^1\text{H}$  NMR of **9** (400 MHz,  $\text{CDCl}_3$ ):

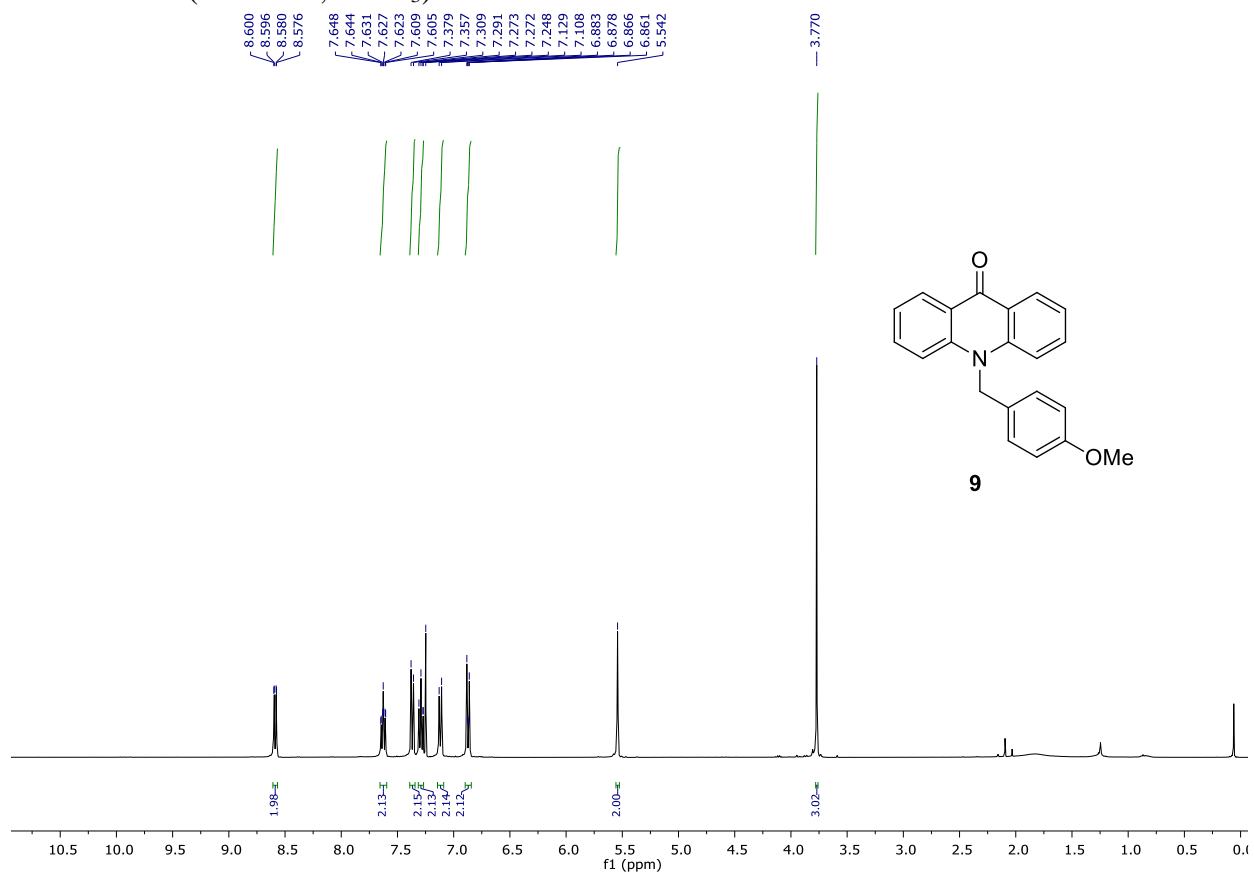

$^{13}\text{C}$  { $^1\text{H}$ } NMR of **9** (100 MHz,  $\text{CDCl}_3$ ):

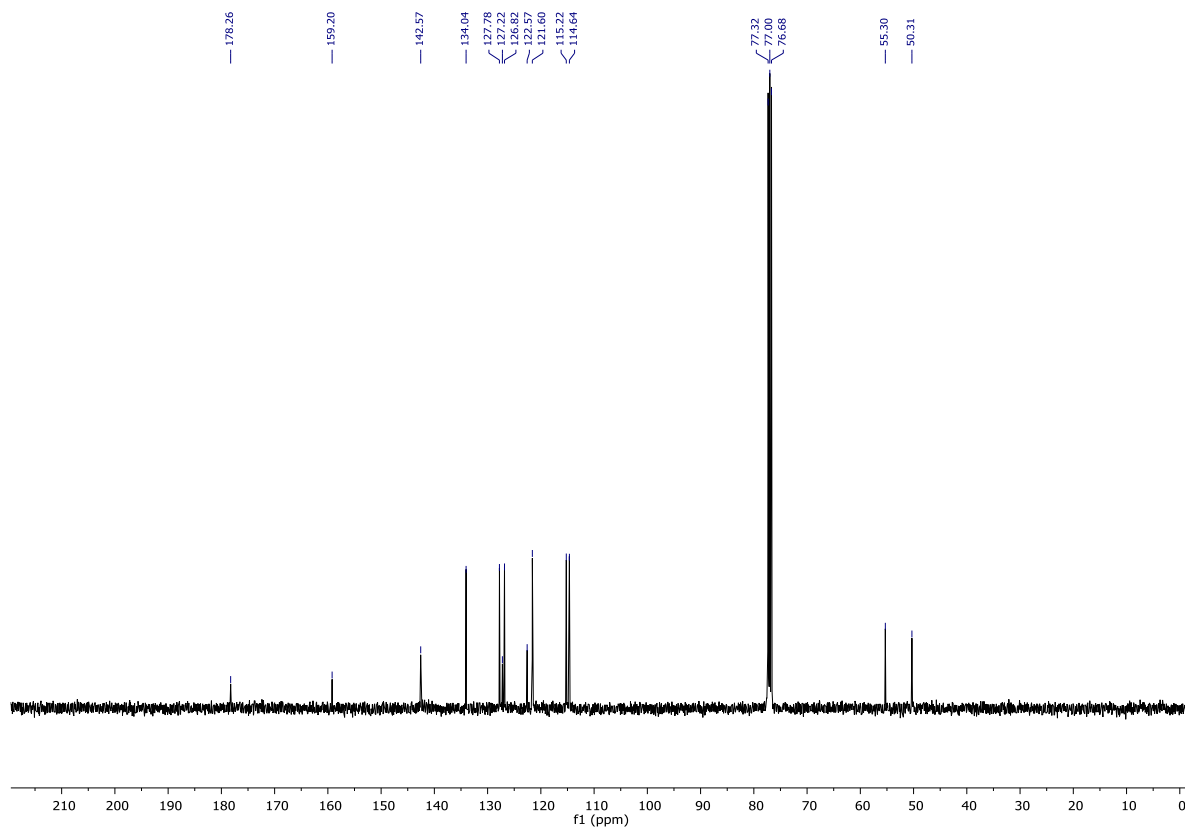

$^1\text{H}$  NMR of **10** (400 MHz,  $\text{CDCl}_3$ ):

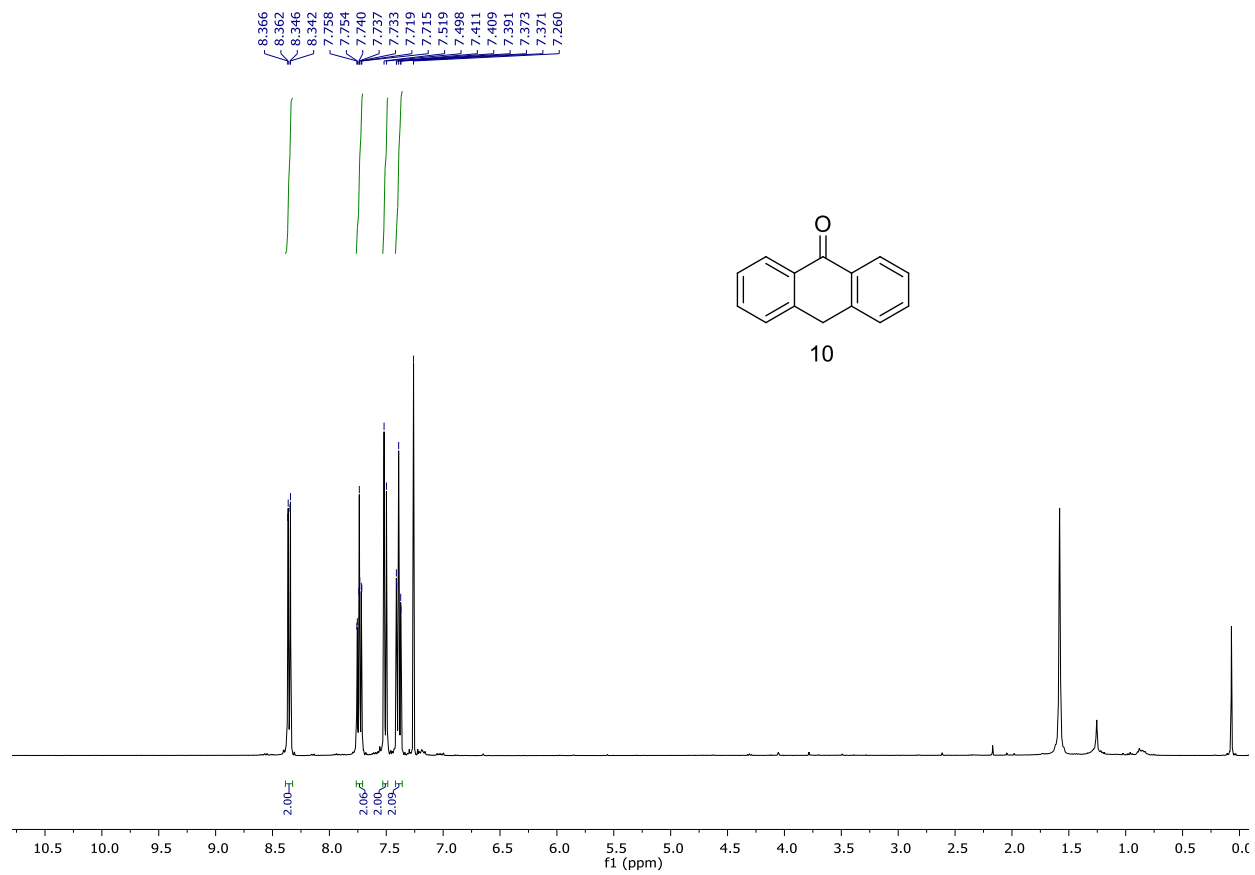

Supplement: d3cc02127k1.pdf [file d3cc02127k1.pdf]
